# Supplementary material for: Predicting evolutionary change at the DNA level in a natural Mimulus population
Source: PLoS Genet. 2021 Jan 13;17(1):e1008945. doi: 10.1371/journal.pgen.1008945 (PMC7837469; doi:10.1371/journal.pgen.1008945)
Supplement: S5 Table — The chosen for each test are reported on a separate sheet. Statistics from all model fits are reported for each SNP. (XLSX) [file pgen.1008945.s005.xlsx]

## Sheet: male2013
LRT	P-value	gene	pos	qLines	Q0 2013	LL0 2013	q adult 2013	q male 2013	LL1 2013	pos again	qLines	Q0 2014	LL0 2014	q adult 2014	q male 2014	LL1 2014	q loser 2014	q winner 2014	LL2 2014	q loser 2014	q winner 2014	q male	LL3 2014	gene	pos	qLines	Qa 13	Qm 13	LL0	Qa13	qm13	qz14	LL1
70.1716	0	N02984	24409596	0.4385	0.70262	-1665.25	0.52763	0.98436	-1630.17	24409596	0.4385	0.66041	-2131.38	0.64232	0.70087	-2131	0.73549	0.63628	-2129.86	0.73549	0.57702	0.72154	-2128.07	N02984	24409596	0.4385	0.61541	0.98094	-3766.15	0.52735	0.98427	0.66048	-3761.54
66.057	4.44089e-16	A00904	5534113	0.52941	0.61253	-755.429	0.45505	0.9641	-722.4	5534113	0.52941	0.50264	-1608.47	0.50318	0.50088	-1608.47	0.648	0.46877	-1604.71	0.648	0.41827	0.54461	-1603.67	A00904	5534113	0.52941	0.48541	0.96075	-2331.5	0.45507	0.96366	0.50262	-2330.88
64.9128	7.77156e-16	A00914	5613672	0.42781	0.54698	-320.272	0.36479	1	-287.815	5613672	0.42781	0.50511	-590.346	0.56337	0.39188	-588.504	0.89048	0.42453	-569.888	0.89033	0.37927	0.48779	-569.288	A00914	5613672	0.42781	0.45947	1	-881.922	0.36468	1	0.50505	-878.161
64.158	1.11022e-15	G00324	2029774	0.88235	0.57871	-1573.65	0.85583	0	-1541.57	2029774	0.88235	0.74737	-2540.48	0.75405	0.72739	-2540.44	0.67308	0.76225	-2540.11	0.67306	0.79493	0.70925	-2539.85	G00324	2029774	0.88235	0.78418	1e-05	-4083.46	0.85552	1e-05	0.74728	-4082.05
58.4774	2.05391e-14	H00963.H00964	7132485	0.61497	0.3354	-1490.59	0.48574	0.06166	-1461.35	7132485	0.61497	0.35355	-2400.15	0.36829	0.32588	-2399.87	0.20672	0.39279	-2393.9	0.20716	0.46423	0.30141	-2390.7	H00963.H00964	7132485	0.61497	0.39582	0.07248	-3866.89	0.48606	0.06134	0.35382	-3861.5
57.1836	3.9746e-14	I00214	2590205	0.23529	0.18109	-2306.17	0.27891	0.03723	-2277.58	2590205	0.23529	0.21122	-3422.9	0.19323	0.24473	-3422.03	0.19324	0.21654	-3422.7	0.19277	0.19351	0.24446	-3422.03	I00214	2590205	0.23529	0.2338	0.03915	-5671.49	0.27872	0.03748	0.2112	-5668.64
53.1418	3.10307e-13	F01984	18547084	0.51872	0.49253	-253.929	0.25407	0.98841	-227.358	18547084	0.51872	0.39063	-618.598	0.39567	0.37738	-618.57	0.55994	0.35616	-615.695	0.56025	0.3282	0.39918	-615.401	F01984	18547084	0.51872	0.3532	0.97359	-848.469	0.25422	0.98809	0.39054	-845.957
51.871	5.92748e-13	K01092	16738303	0.68984	0.706	-2081.12	0.52603	0.99878	-2055.19	16738303	0.68984	0.69756	-2431.7	0.66204	0.77236	-2430.8	0.87791	0.66266	-2427.72	0.8779	0.56233	0.81394	-2423.99	K01092	16738303	0.68984	0.64098	0.99408	-4162.25	0.52567	0.99989	0.6974	-4156.6
48.732	2.93443e-12	B00940	6619091	0.63636	0.468	-758.796	0.29237	0.88416	-734.43	6619091	0.63636	0.49145	-1596.42	0.49626	0.47841	-1596.38	0.41854	0.50952	-1595.42	0.41859	0.54117	0.46112	-1594.9	B00940	6619091	0.63636	0.43231	0.83527	-2340.09	0.2925	0.88438	0.49151	-2330.85
47.5938	5.24336e-12	C00004	221226	0.70588	0.4952	-2276.23	0.66978	0.17304	-2252.43	221226	0.70588	0.49284	-2957.24	0.56484	0.34047	-2952.75	0.55235	0.47414	-2956.47	0.55235	0.57739	0.33583	-2952.69	C00004	221226	0.70588	0.54995	0.19718	-5216.51	0.66974	0.17367	0.4932	-5209.67
47.182	6.46916e-12	N03158	25214892	0.68449	0.50101	-771.611	0.37402	0.87873	-748.02	25214892	0.68449	0.59026	-1114.01	0.59214	0.58307	-1114	0.56868	0.59594	-1113.92	0.56867	0.60947	0.57511	-1113.83	N03158	25214892	0.68449	0.50976	0.85231	-1874.94	0.37425	0.87813	0.58997	-1862.03
46.6178	8.62732e-12	J00500	2657611	0.94118	0.88883	-151	1	0.39528	-127.691	2657611	0.94118	0.90944	-304.776	0.94995	0.81627	-302.512	0.98087	0.88662	-302.854	0.98091	0.92619	0.82679	-301.96	J00500	2657611	0.94118	0.94437	0.4183	-437.984	1	0.39531	0.90936	-432.467
44.6112	2.40313e-11	C00058	1771285	0.2246	0.42404	-886.818	0.2614	0.84585	-864.512	1771285	0.2246	0.27818	-1540.34	0.25768	0.32313	-1540	0.30693	0.27169	-1540.23	0.30753	0.23343	0.33263	-1539.57	C00058	1771285	0.2246	0.27339	0.84516	-2404.91	0.26152	0.84502	0.2783	-2404.86
44.052	3.19766e-11	I00504	10709612	0.86096	0.75307	-675.685	0.92026	0.10689	-653.659	10709612	0.86096	0.84599	-796.582	0.85381	0.82388	-796.513	0.96514	0.82722	-795.372	0.96534	0.81846	0.84065	-795.349	I00504	10709612	0.86096	0.87412	0.12602	-1421.83	0.91994	0.11365	0.84596	-1420.69
43.9958	3.29081e-11	D01759	15073044	0.14439	0.36285	-418.877	0.21879	0.94853	-396.88	15073044	0.14439	0.28508	-660.706	0.28079	0.29608	-660.676	0.31992	0.27917	-660.552	0.31992	0.25925	0.30613	-660.39	D01759	15073044	0.14439	0.26444	0.93035	-1058.7	0.2188	0.94863	0.28527	-1057.59
43.9818	3.31444e-11	D00076.D00077.D00078	353934	0.95187	0.73927	-3547.27	0.53691	0.94695	-3525.28	353934	0.95187	0.66533	-3456.25	0.70161	0.5981	-3455.5	0.82823	0.62623	-3453.02	0.82894	0.63318	0.61808	-3453	D00076.D00077.D00078	353934	0.95187	0.62339	0.94274	-6812.43	0.53498	0.94449	0.66527	-6810.08
43.7304	3.76872e-11	B00550	2638679	0.39572	0.62748	-2473.44	0.51503	0.91384	-2451.57	2638679	0.39572	0.56148	-3011.64	0.57267	0.53048	-3011.35	0.64473	0.53857	-3009.77	0.64473	0.53433	0.54459	-3009.76	B00550	2638679	0.39572	0.5456	0.90814	-5431.68	0.51457	0.91242	0.56148	-5430.96
43.3572	4.56055e-11	F00157	710904	0.91444	0.76115	-1524.46	0.88384	0.31109	-1502.78	710904	0.91444	0.84369	-2243.86	0.83626	0.86157	-2243.78	0.58317	0.88216	-2236.69	0.58329	0.91189	0.83148	-2236.08	F00157	710904	0.91444	0.85887	0.29904	-3710.13	0.88429	0.29481	0.84311	-3709.65
42.9068	5.74107e-11	C00933	16441552	0.52406	0.7155	-257.598	0.99419	0.03577	-236.144	16441552	0.52406	0.9202	-380.209	1	0.72921	-377.428	1	0.88388	-379.035	1	0.98408	0.73456	-377.404	C00933	16441552	0.52406	0.94518	0.04774	-616.784	0.9942	0.03561	0.92023	-616.354
42.197	8.25265e-11	L00123	872236	0.29947	0.28754	-1447.84	0.41098	0.03459	-1426.74	872236	0.29947	0.33084	-1855.94	0.34956	0.29249	-1855.64	0.30514	0.33701	-1855.83	0.30544	0.37542	0.28154	-1855.2	L00123	872236	0.29947	0.35964	0.03766	-3284.34	0.41077	0.03456	0.33096	-3282.69
42.1454	8.4733e-11	J00309	1400559	0.33155	0.42977	-517.97	0.6922	0	-496.897	1400559	0.33155	0.49275	-851.269	0.5163	0.44843	-851.08	0.44562	0.50123	-851.148	0.44551	0.54514	0.43856	-850.76	J00309	1400559	0.33155	0.55178	0	-1351.47	0.69231	0	0.49269	-1348.17
42.082	8.75251e-11	F02057	19032411	0.79679	0.71137	-1326.16	0.54261	1	-1305.12	19032411	0.79679	0.67913	-1708.8	0.61393	0.80298	-1706.17	0.67489	0.6801	-1708.8	0.67491	0.57136	0.81431	-1705.48	F02057	19032411	0.79679	0.63094	0.99993	-3017.04	0.54255	1	0.67886	-3013.92
41.7356	1.04489e-10	A01049	7850197	0.54545	0.37942	-763.711	0.54317	0	-742.843	7850197	0.54545	0.42992	-1473.15	0.38354	0.52089	-1471.94	0.25089	0.46262	-1469.56	0.25022	0.4432	0.48997	-1469.46	A01049	7850197	0.54545	0.46563	0.00014	-2218.34	0.54336	0	0.42999	-2216
41.4286	1.22256e-10	K00334	1546083	0.42781	0.51764	-2609.05	0.38412	0.78649	-2588.34	1546083	0.42781	0.48928	-3209.45	0.48859	0.492	-3209.45	0.47468	0.49369	-3209.39	0.47468	0.4958	0.48999	-3209.39	K00334	1546083	0.42781	0.45442	0.7736	-5801.09	0.38411	0.78612	0.4896	-5797.78
41.4156	1.23071e-10	L01374	23204948	0.95722	0.67764	-364.421	0.87986	0.01808	-343.713	23204948	0.95722	0.95487	-724.419	0.96727	0.91761	-723.916	0.96939	0.95435	-724.404	0.96875	0.9672	0.91761	-723.915	L01374	23204948	0.95722	0.93883	3e-05	-1069.56	0.88027	0.01725	0.95483	-1068.13
41.2998	1.30582e-10	C00829	15882098	0.7861	0.47794	-2028.13	0.30987	0.78031	-2007.48	15882098	0.7861	0.40735	-2961.14	0.20891	0.79343	-2922.58	0.38318	0.41465	-2961.01	0.38318	0.10161	0.81078	-2914.01	C00829	15882098	0.7861	0.37638	0.76619	-4970.63	0.3098	0.78008	0.40692	-4968.62
40.4168	2.05169e-10	I00605	11660693	0.39037	0.4129	-263.709	0.17462	1	-243.5	11660693	0.39037	0.42996	-588.969	0.3561	0.5862	-587.819	0.39643	0.43628	-588.904	0.3964	0.3343	0.60246	-587.698	I00605	11660693	0.39037	0.36141	0.97811	-838.234	0.17465	0.99999	0.43026	-832.47
39.7004	2.96065e-10	N03338	25961972	0.47059	0.49141	-688.188	0.33283	0.94241	-668.338	25961972	0.47059	0.43255	-1183.55	0.40003	0.50576	-1182.56	0.35949	0.44935	-1182.65	0.3598	0.41947	0.49732	-1182.23	N03338	25961972	0.47059	0.40205	0.91344	-1854.15	0.33283	0.94256	0.43241	-1851.89
38.953	4.34133e-10	C01119	17538419	0.71123	0.52176	-865.442	0.34513	1	-845.966	17538419	0.71123	0.53803	-1568.54	0.5348	0.54581	-1568.53	0.55714	0.53369	-1568.5	0.55736	0.52344	0.54982	-1568.46	C01119	17538419	0.71123	0.47757	0.99996	-2419.95	0.34464	0.99998	0.53779	-2414.5
38.7098	4.91734e-10	L01899	25869330	0.39037	0.45414	-587.392	0.61189	0	-568.037	25869330	0.39037	0.47121	-747.293	0.41459	0.58515	-745.598	0.41925	0.48212	-747.021	0.41925	0.41236	0.58624	-745.596	L01899	25869330	0.39037	0.51846	0	-1318.56	0.61158	0	0.4712	-1315.33
38.5402	5.36374e-10	J01546	17235317	0.8984	0.78998	-845.112	0.91615	0.50014	-825.842	17235317	0.8984	0.91968	-1372.56	0.95955	0.83061	-1364.68	0.95349	0.90833	-1371.11	0.95358	0.96409	0.82903	-1364.58	J01546	17235317	0.8984	0.91884	0.49928	-2198.41	0.91626	0.49928	0.91943	-2198.41
38.4504	5.61631e-10	N00642	3352069	0.44385	0.57363	-1313.99	0.44241	0.89887	-1294.77	3352069	0.44385	0.54071	-2771.55	0.53341	0.56301	-2771.45	0.5891	0.53043	-2771.18	0.58912	0.50196	0.57572	-2770.76	N00642	3352069	0.44385	0.5108	0.88961	-3979.12	0.44127	0.89645	0.54076	-3976.93
38.4182	5.70974e-10	K00613	3277342	0.41176	0.72523	-441.736	0.59329	1	-422.527	3277342	0.41176	0.61559	-915.552	0.53345	0.7785	-909.22	0.54996	0.62972	-914.909	0.54996	0.52583	0.78054	-909.17	K00613	3277342	0.41176	0.60843	1	-1338.19	0.59359	1	0.61562	-1338.08
38.2442	6.24223e-10	L00463	6103297	0.69519	0.78616	-2478.23	0.89369	0.57894	-2459.11	6103297	0.69519	0.8939	-3407.18	0.92144	0.83411	-3405.02	0.94644	0.87378	-3404.88	0.94644	0.899	0.84075	-3404.21	L00463	6103297	0.69519	0.89382	0.57521	-5824.11	0.89382	0.57521	0.89382	-5824.11
37.5648	8.84259e-10	F01443	12163793	0.75936	0.87895	-1834.52	0.7966	0.98976	-1815.73	12163793	0.75936	0.88781	-2364.98	0.84194	0.95943	-2359.99	0.91478	0.88062	-2364.47	0.91471	0.79167	0.97206	-2356	F01443	12163793	0.75936	0.85862	0.98499	-4186.39	0.79655	0.98955	0.88766	-4180.72
37.194	1.06942e-09	M00790	15265925	0.3262	0.47522	-1167.11	0.6306	0.11018	-1148.51	15265925	0.3262	0.41563	-2064.33	0.42981	0.38355	-2064.06	0.38045	0.42691	-2063.96	0.38048	0.46137	0.37381	-2063.18	M00790	15265925	0.3262	0.47463	0.18554	-3224.64	0.62992	0.11086	0.41568	-3212.84
37.1688	1.08333e-09	M01497.M01498	18681837	0.94652	0.79975	-2021.43	0.92501	0.40346	-2002.85	18681837	0.94652	0.891	-2141.55	0.91445	0.84145	-2141.02	0.84936	0.90128	-2141.26	0.84969	0.952	0.82935	-2140.05	M01497.M01498	18681837	0.94652	0.90224	0.40669	-4103.99	0.9237	0.40347	0.89069	-4103.73
36.9506	1.2116e-09	J00071	322083	0.37433	0.32884	-615.474	0.47271	0	-596.999	322083	0.37433	0.37454	-1073.72	0.39054	0.34259	-1073.52	0.30724	0.39029	-1072.98	0.30762	0.43614	0.32567	-1072.12	J00071	322083	0.37433	0.40829	1e-05	-1672.86	0.47272	0	0.3746	-1670.72
36.5904	1.45748e-09	E00155	861105	0.62567	0.66157	-2281.06	0.55411	0.90325	-2262.76	861105	0.62567	0.6256	-3259.21	0.59242	0.69383	-3257.42	0.52485	0.65358	-3256.29	0.52485	0.63059	0.6853	-3255.85	E00155	861105	0.62567	0.60235	0.8972	-5523.69	0.55385	0.90351	0.6256	-5521.97
36.5504	1.48769e-09	A01036	7692976	0.54545	0.64404	-1322.34	0.52739	0.93344	-1304.06	7692976	0.54545	0.54062	-1588.65	0.52347	0.58194	-1588.25	0.47427	0.5641	-1587.28	0.47451	0.56147	0.56778	-1587.27	A01036	7692976	0.54545	0.53645	0.93179	-2892.76	0.52762	0.93179	0.54064	-2892.71
36.5174	1.5131e-09	J01018	6411305	0.4492	0.81735	-499.134	0.97718	0.18251	-480.876	6411305	0.4492	0.73621	-844.717	0.78317	0.63318	-843.594	0.90942	0.71281	-842.805	0.90891	0.74811	0.65073	-842.404	J01018	6411305	0.4492	0.81099	0.26444	-1335.81	0.977	0.18283	0.7362	-1325.59
36.2932	1.69755e-09	D00320.D00321	1451035	0.34225	0.40966	-1463.72	0.53996	0.14432	-1445.57	1451035	0.34225	0.43838	-2297.41	0.44125	0.42987	-2297.39	0.26991	0.47074	-2292.83	0.27037	0.51957	0.39716	-2291.58	D00320.D00321	1451035	0.34225	0.47275	0.15667	-3745.76	0.54008	0.14408	0.4383	-3742.98
36.2902	1.70017e-09	F01627	16101334	0.78075	0.68372	-560.276	0.84068	0	-542.131	16101334	0.78075	0.79528	-945.127	0.81162	0.76094	-944.911	0.60705	0.82499	-942.028	0.60705	0.87773	0.73662	-940.437	F01627	16101334	0.78075	0.80972	0.00011	-1487.7	0.84063	0	0.79505	-1487.26
36.2756	1.71295e-09	K00073.K00074.K00075	354731	0.38503	0.41233	-1804.3	0.5702	0.07437	-1786.16	354731	0.38503	0.39854	-2372.73	0.40149	0.38953	-2372.72	0.30754	0.42163	-2371.38	0.30754	0.47319	0.35018	-2370.64	K00073.K00074.K00075	354731	0.38503	0.45206	0.09899	-4131.51	0.57109	0.07611	0.3987	-4125.79
36.067	1.90648e-09	N00048	207026	0.75401	0.39922	-432.694	0.56842	0	-414.66	207026	0.75401	0.57419	-846.64	0.57035	0.58316	-846.624	0.38211	0.60308	-843.259	0.38207	0.63511	0.55846	-842.839	N00048	207026	0.75401	0.57225	0	-1261.31	0.56843	0	0.57395	-1261.3
36.0068	1.9663e-09	N01593	13973478	0.7754	0.80852	-2283.5	0.72893	0.95698	-2265.5	13973478	0.7754	0.80229	-2791.49	0.78107	0.84438	-2790.51	0.82329	0.79731	-2791.3	0.82293	0.75961	0.85015	-2789.68	N01593	13973478	0.7754	0.77631	0.95515	-5059.83	0.72851	0.95733	0.80232	-5056.98
35.8262	2.15727e-09	D02019	17545237	0.70588	0.45789	-3799.64	0.57288	0.20914	-3781.73	17545237	0.70588	0.48018	-4920.68	0.51092	0.41929	-4919.49	0.52667	0.46708	-4920.15	0.52667	0.50144	0.42156	-4919.41	D02019	17545237	0.70588	0.51238	0.20301	-8534.61	0.56987	0.19509	0.48026	-8532.08
35.7402	2.25463e-09	H00146	715111	0.82888	0.72553	-2788.37	0.85385	0.42936	-2770.5	715111	0.82888	0.74947	-3498.42	0.74803	0.75223	-3498.42	0.66363	0.76929	-3496.95	0.66364	0.78683	0.74215	-3496.71	H00146	715111	0.82888	0.78228	0.44372	-6272.14	0.85422	0.42947	0.74914	-6268.92
35.6674	2.34048e-09	B00664.B00665	3335560	0.6631	0.48893	-684.915	0.62529	0.1401	-667.082	3335560	0.6631	0.6414	-1382.19	0.65414	0.61414	-1382.03	0.54403	0.66262	-1380.45	0.5446	0.70995	0.58816	-1379.2	B00664.B00665	3335560	0.6631	0.63688	0.13764	-2049.33	0.62548	0.14006	0.64146	-2049.27
35.5944	2.42985e-09	M01447	18454219	0.72727	0.68821	-1481.83	0.57094	0.95816	-1464.04	18454219	0.72727	0.60046	-2422.04	0.59397	0.61872	-2421.94	0.55334	0.61561	-2421.38	0.55321	0.6179	0.61224	-2421.38	M01447	18454219	0.72727	0.59122	0.95417	-3886.33	0.57151	0.95735	0.60094	-3886.08
35.5788	2.44939e-09	A00568	3014273	0.54011	0.54557	-578.492	0.42408	0.96201	-560.703	3014273	0.54011	0.63653	-1321.98	0.61098	0.69753	-1321.2	0.57599	0.65047	-1321.35	0.57598	0.62662	0.69262	-1320.96	A00568	3014273	0.54011	0.57436	0.94772	-1892.05	0.42417	0.96196	0.63636	-1882.68
35.5024	2.54737e-09	M01978.M01979	21014944	0.79144	0.71148	-1344.5	0.56991	1	-1326.75	21014944	0.79144	0.73622	-1767.65	0.67561	0.8573	-1764.76	0.70189	0.74492	-1767.45	0.70189	0.65656	0.86395	-1764.59	M01978.M01979	21014944	0.79144	0.68241	1	-3099.64	0.57026	1	0.73578	-3094.39
34.9974	3.30146e-09	H02111	20600822	0.80214	0.64317	-1472.31	0.75893	0.32654	-1454.81	20600822	0.80214	0.69051	-2219.82	0.72855	0.61287	-2218.13	0.65628	0.69767	-2219.6	0.65624	0.76191	0.60052	-2216.85	H02111	20600822	0.80214	0.71363	0.3376	-3676.18	0.75849	0.32707	0.69053	-3674.63
34.772	3.70666e-09	F01268	6732296	0.50802	0.38617	-1163.75	0.49491	0.14276	-1146.37	6732296	0.50802	0.50797	-2218.87	0.54116	0.43797	-2217.26	0.55798	0.49477	-2218.17	0.55816	0.53245	0.44052	-2217.16	F01268	6732296	0.50802	0.50374	0.14104	-3365.3	0.49512	0.1427	0.50799	-3365.24
34.471	4.3265e-09	N01417	11854556	0.65775	0.64613	-674.064	0.4949	0.97048	-656.829	11854556	0.65775	0.56155	-1230.67	0.52296	0.63987	-1229.33	0.56934	0.55955	-1230.66	0.56927	0.49911	0.64846	-1228.89	N01417	11854556	0.65775	0.54186	0.96023	-1888.45	0.49504	0.97019	0.56133	-1887.5
34.456	4.35997e-09	N03073	24827514	0.20856	0.18203	-838.717	0.12985	0.7715	-821.489	24827514	0.20856	0.15719	-1457.94	0.17251	0.10545	-1457.51	0.20183	0.1469	-1457.51	0.20137	0.16081	0.11166	-1457.31	N03073	24827514	0.20856	0.14547	0.76756	-2279.77	0.12977	0.77109	0.15705	-2279.43
34.418	4.44593e-09	J01132	8657606	0.18182	0.25478	-1528.79	0.14511	0.57521	-1511.58	8657606	0.18182	0.17342	-1829.34	0.13765	0.24098	-1827.66	0.18837	0.17089	-1829.3	0.18867	0.11634	0.24898	-1826.94	J01132	8657606	0.18182	0.16352	0.56915	-3341.28	0.14477	0.57505	0.17343	-3340.92
34.2442	4.86122e-09	K01460.K01461.K01462	24050470	0.5508	0.38728	-2931.62	0.5015	0.15947	-2914.49	24050470	0.5508	0.46586	-3669.77	0.48399	0.4289	-3669.32	0.45881	0.46823	-3669.76	0.45881	0.4981	0.42565	-3669.11	K01460.K01461.K01462	24050470	0.5508	0.47756	0.15257	-6494.06	0.50061	0.14996	0.4662	-6493.69
34.2382	4.87623e-09	H00108	509536	0.4492	0.39742	-1862.51	0.27434	0.70461	-1845.39	509536	0.4492	0.33742	-2353.11	0.38302	0.25118	-2350.34	0.38569	0.32534	-2352.56	0.38561	0.38132	0.25115	-2350.34	H00108	509536	0.4492	0.31711	0.69019	-4023.89	0.27303	0.70232	0.33735	-4022.6
34.1734	5.04134e-09	B00456.B00457	2165515	0.28877	0.55011	-1140.78	0.39045	0.94532	-1123.69	2165515	0.28877	0.44137	-2007.99	0.38023	0.56735	-2004.94	0.42429	0.44573	-2007.95	0.42405	0.35951	0.57206	-2004.63	B00456.B00457	2165515	0.28877	0.42648	0.93982	-3132.09	0.39003	0.94557	0.44146	-3131.68
34.0396	5.40018e-09	N01147	8233335	0.54011	0.32945	-887.572	0.44349	0.10276	-870.552	8233335	0.54011	0.29021	-1334	0.2798	0.31176	-1333.82	0.26751	0.29602	-1333.84	0.26754	0.28601	0.30955	-1333.77	N01147	8233335	0.54011	0.34003	0.12989	-2212.82	0.4433	0.10376	0.29036	-2204.55
33.9914	5.53562e-09	B01597	17423662	0.54545	0.57729	-936.689	0.45445	0.83131	-919.694	17423662	0.54545	0.58416	-1600.96	0.54526	0.66611	-1599.34	0.57737	0.586	-1600.95	0.57737	0.52309	0.67494	-1599.01	B01597	17423662	0.54545	0.54047	0.81311	-2525.52	0.45443	0.83073	0.58416	-2520.65
33.9536	5.64422e-09	C01141	17669289	0.31016	0.62123	-384.52	0.80712	0.12662	-367.543	17669289	0.31016	0.59493	-730.113	0.59369	0.59911	-730.11	0.71287	0.56809	-728.45	0.7126	0.52671	0.63293	-727.939	C01141	17669289	0.31016	0.65188	0.18754	-1104.48	0.80705	0.127	0.59501	-1097.66
33.832	6.00824e-09	G00549	3665459	0.48663	0.70239	-1206.69	0.88423	0.31227	-1189.77	3665459	0.48663	0.68116	-1394.08	0.64039	0.76673	-1393.3	0.38243	0.73838	-1387.59	0.38228	0.74739	0.72269	-1387.56	G00549	3665459	0.48663	0.75196	0.34887	-2552	0.88397	0.31387	0.68119	-2545.9
33.7718	6.19707e-09	M01534	18859873	0.48128	0.48044	-996.141	0.60346	0.15181	-979.256	18859873	0.48128	0.54255	-1203.61	0.54547	0.53332	-1203.6	0.5894	0.53348	-1203.33	0.5894	0.52638	0.54484	-1203.31	M01534	18859873	0.48128	0.56517	0.16104	-2183.8	0.60334	0.15229	0.54255	-2182.87
33.763	6.22517e-09	L01410	23488820	0.36364	0.46964	-1422.8	0.36144	0.72474	-1405.92	23488820	0.36364	0.44185	-2663.85	0.39185	0.54349	-2660.32	0.4315	0.44422	-2663.82	0.43157	0.37125	0.54951	-2659.82	L01410	23488820	0.36364	0.41627	0.71547	-4072.04	0.36163	0.72448	0.44171	-4069.77
33.7302	6.33102e-09	D01960	17150406	0.22995	0.38977	-1665.79	0.27704	0.67474	-1648.93	17150406	0.22995	0.31858	-2275.31	0.28052	0.3879	-2273.96	0.32463	0.31758	-2275.31	0.3247	0.25885	0.39443	-2273.54	D01960	17150406	0.22995	0.30368	0.66915	-3924.79	0.27754	0.67448	0.31876	-3924.24
33.518	7.06075e-09	H00392	2410656	0.62567	0.63183	-550.398	0.80945	0.16944	-533.639	2410656	0.62567	0.70173	-1032.7	0.69615	0.71953	-1032.66	0.4146	0.75679	-1024.97	0.41504	0.80448	0.67222	-1024.03	H00392	2410656	0.62567	0.73493	0.1975	-1568.12	0.80922	0.16945	0.70173	-1566.34
33.4972	7.13667e-09	F00333	1575381	0.8984	0.81954	-621.35	0.92372	0.40733	-604.601	1575381	0.8984	0.82433	-1230	0.82407	0.82369	-1230	0.84304	0.82188	-1229.96	0.842	0.81971	0.82559	-1229.95	F00333	1575381	0.8984	0.85341	0.42886	-1838.31	0.92358	0.40777	0.82409	-1834.6
33.4574	7.28421e-09	F00587	2736245	0.57754	0.49762	-1056.19	0.59957	0.22421	-1039.46	2736245	0.57754	0.61853	-1480.42	0.6445	0.55618	-1479.59	0.61568	0.61943	-1480.42	0.61568	0.66767	0.54275	-1479.19	F00587	2736245	0.57754	0.61225	0.22268	-2520.01	0.59958	0.22422	0.61862	-2519.88
33.2592	8.06573e-09	F00480	2222716	0.77005	0.74842	-2076.08	0.86621	0.47212	-2059.45	2222716	0.77005	0.81326	-3127.56	0.84371	0.76103	-3126.36	0.89589	0.79512	-3125.52	0.89581	0.81482	0.77175	-3125.28	F00480	2222716	0.77005	0.82949	0.48662	-5188.23	0.86621	0.47213	0.81339	-5187.01
33.1672	8.4565e-09	E01519	17884265	0.85561	0.5867	-2020.55	0.4287	0.93917	-2003.97	17884265	0.85561	0.61977	-2535.57	0.58184	0.6955	-2534.53	0.65042	0.6108	-2535.43	0.6496	0.53843	0.70578	-2533.66	E01519	17884265	0.85561	0.55834	0.91599	-4545.3	0.42806	0.93894	0.61945	-4539.54
33.0048	9.19316e-09	H01261.H01262	14905779	0.49198	0.49962	-2100.45	0.37345	0.75415	-2083.95	14905779	0.49198	0.42233	-2270.31	0.40204	0.46038	-2269.89	0.43803	0.41889	-2270.26	0.43809	0.38332	0.46623	-2269.59	H01261.H01262	14905779	0.49198	0.40612	0.74673	-4354.95	0.37398	0.75384	0.42221	-4354.26
32.7182	1.06535e-08	B00274	1228995	0.68449	0.40657	-1943.59	0.26292	0.73069	-1927.23	1228995	0.68449	0.41579	-2599.42	0.35445	0.53888	-2596.34	0.49551	0.39454	-2598.46	0.49487	0.27574	0.55587	-2592.69	B00274	1228995	0.68449	0.36481	0.7084	-4500.45	0.26269	0.72561	0.41558	-4496.12
32.4446	1.22639e-08	J01804	18835590	0.56684	0.69841	-1487.67	0.60882	0.93876	-1471.45	18835590	0.56684	0.70787	-2164.47	0.70392	0.71932	-2164.43	0.79178	0.68256	-2161.94	0.79197	0.64179	0.74027	-2160.81	J01804	18835590	0.56684	0.67407	0.93118	-3639.5	0.60859	0.93854	0.70805	-3635.92
32.415	1.24522e-08	H01853	18347794	0.64171	0.41851	-786.212	0.52982	0.08085	-770.005	18347794	0.64171	0.4652	-1375.4	0.4134	0.59499	-1372.18	0.39366	0.48883	-1373.97	0.39378	0.42745	0.58897	-1372.04	H01853	18347794	0.64171	0.48631	0.09192	-2146.53	0.52973	0.08065	0.46531	-2145.41
32.4106	1.24804e-08	N02348	20970655	0.8984	0.79625	-2545.28	0.93324	0.52161	-2529.07	20970655	0.8984	0.84847	-3031.96	0.87776	0.79072	-3031.27	0.77718	0.86888	-3031.05	0.77802	0.9467	0.76779	-3028.8	N02348	20970655	0.8984	0.87802	0.52963	-5562.69	0.93267	0.52197	0.84837	-5561.04
32.3308	1.30036e-08	D02495	20697451	0.27273	0.40209	-1101.09	0.30897	0.75462	-1084.93	20697451	0.27273	0.29716	-1632.59	0.23978	0.42089	-1627.51	0.22029	0.32057	-1630.49	0.22029	0.25279	0.41663	-1627.32	D02495	20697451	0.27273	0.30103	0.75504	-2717.57	0.30892	0.75439	0.29715	-2717.52
32.298	1.32249e-08	F00727.F00728	3443731	0.52941	0.63914	-500.567	0.83559	0	-484.418	3443731	0.52941	0.60876	-910.894	0.61324	0.59565	-910.877	0.51353	0.62886	-910.25	0.51353	0.67645	0.55944	-909.866	F00727.F00728	3443731	0.52941	0.67669	0.05481	-1401.84	0.83509	1e-05	0.60903	-1395.31
32.204	1.38805e-08	H01824	18195793	0.7754	0.43257	-596.995	0.63864	0.05719	-580.893	18195793	0.7754	0.61904	-1310.93	0.61491	0.62955	-1310.92	0.4456	0.65256	-1308.78	0.44561	0.69164	0.60049	-1308.46	H01824	18195793	0.7754	0.62415	0.05933	-1891.86	0.63794	0.05702	0.61898	-1891.82
32.1854	1.4014e-08	N00144.N00145	664698	0.82353	0.44086	-719.891	0.26709	1	-703.799	664698	0.82353	0.45758	-937.588	0.45797	0.45741	-937.588	0.50549	0.45087	-937.513	0.50593	0.44452	0.46368	-937.502	N00144.N00145	664698	0.82353	0.38568	0.99999	-1644.57	0.26702	1	0.45767	-1641.39
32.1664	1.41517e-08	J00366	1635409	0.95722	0.82778	-2165.48	0.89045	0.4733	-2149.4	1635409	0.95722	0.85579	-3048.55	0.87778	0.79677	-3047.78	0.81046	0.8662	-3048.13	0.81084	0.90613	0.78398	-3046.59	J00366	1635409	0.95722	0.87194	0.47584	-5093.26	0.88988	0.47359	0.85555	-5092.71
31.9914	1.54857e-08	H02116	20678715	0.73797	0.82202	-1432.7	0.74683	0.95696	-1416.7	20678715	0.73797	0.83019	-2117.75	0.80072	0.88594	-2115.03	0.79916	0.83905	-2117.12	0.79918	0.80152	0.88591	-2115.03	H02116	20678715	0.73797	0.80477	0.95252	-3538.85	0.74632	0.95701	0.83027	-3534.46
31.8612	1.65592e-08	N03181	25308603	0.64171	0.22653	-2172.09	0.15625	0.56895	-2156.16	25308603	0.64171	0.29626	-3836.02	0.23936	0.48285	-3826.4	0.26893	0.30833	-3835.64	0.26884	0.21909	0.48624	-3825.82	N03181	25308603	0.64171	0.24989	0.5597	-6001.18	0.1561	0.56926	0.29646	-5992.18
31.8236	1.68829e-08	I01068	14452353	0.79144	0.52698	-1587.27	0.42207	0.81092	-1571.36	14452353	0.79144	0.54849	-2116.96	0.41214	0.81872	-2095.85	0.36132	0.59706	-2108.78	0.36131	0.44093	0.8108	-2095.11	I01068	14452353	0.79144	0.50648	0.79547	-3693.06	0.42178	0.81046	0.54822	-3688.32
31.6802	1.81766e-08	H00246	1363304	0.4385	0.45677	-1714.62	0.31163	0.73594	-1698.78	1363304	0.4385	0.4961	-2183.67	0.44529	0.6036	-2181.51	0.46164	0.50546	-2183.43	0.46162	0.432	0.61027	-2181.42	H00246	1363304	0.4385	0.43685	0.70451	-3857.05	0.31175	0.73616	0.4961	-3849.63
31.6648	1.83213e-08	H01653	17204103	0.60428	0.68757	-721.527	0.82274	0.34997	-705.694	17204103	0.60428	0.69518	-1242.85	0.67227	0.74643	-1242.41	0.6753	0.70012	-1242.77	0.67524	0.66999	0.7475	-1242.41	H01653	17204103	0.60428	0.73314	0.38624	-1953.17	0.82272	0.34958	0.69516	-1948.55
31.6604	1.83629e-08	J01541	17186046	0.5615	0.23157	-449.086	0.03306	0.73498	-433.256	17186046	0.5615	0.38444	-930.252	0.33646	0.48217	-929.489	0.16689	0.41931	-927.911	0.16602	0.39584	0.45477	-927.813	J01541	17186046	0.5615	0.28225	0.65322	-1377.41	0.03309	0.7349	0.38443	-1363.51
31.613	1.88166e-08	I01089	14579693	0.63636	0.52191	-623.335	0.298	0.97085	-607.529	14579693	0.63636	0.50643	-994.542	0.47082	0.5818	-994.145	0.6111	0.48345	-993.728	0.61088	0.39551	0.62124	-992.356	I01089	14579693	0.63636	0.44955	0.95823	-1605.84	0.29812	0.97082	0.50627	-1602.07
31.5552	1.93851e-08	L00353	4691163	0.34225	0.18811	-335.451	0.0616	0.79847	-319.674	4691163	0.34225	0.11618	-952.056	0.11765	0.11036	-952.049	0.28902	0.0816	-947.672	0.28905	0.05184	0.14339	-946.927	L00353	4691163	0.34225	0.09993	0.78283	-1272.55	0.06154	0.79858	0.11613	-1271.73
31.3906	2.11e-08	H01049	8384023	0.26203	0.18472	-2063.88	0.08407	0.37531	-2048.18	8384023	0.26203	0.16869	-2414.28	0.14588	0.21219	-2413.18	0.07266	0.18803	-2410.72	0.07265	0.17775	0.20238	-2410.61	H01049	8384023	0.26203	0.14507	0.35965	-4466.51	0.08524	0.375	0.16859	-4462.47
31.347	2.15792e-08	K00482	2409547	0.72727	0.63773	-1291.8	0.74904	0.34845	-1276.12	2409547	0.72727	0.65057	-1738.31	0.65134	0.64802	-1738.31	0.59854	0.6659	-1737.6	0.59854	0.69481	0.62494	-1737.25	K00482	2409547	0.72727	0.68423	0.36766	-3017.68	0.74864	0.34863	0.65046	-3014.43
31.3466	2.15836e-08	N00098.N00099	432310	0.80749	0.56136	-1406.52	0.73108	0.17702	-1390.84	432310	0.80749	0.64627	-2815.47	0.67619	0.58766	-2814.86	0.52461	0.67112	-2813.62	0.52383	0.74761	0.55907	-2811.29	N00098.N00099	432310	0.80749	0.66925	0.1979	-4207.54	0.73093	0.17762	0.6459	-4206.31
31.3358	2.1704e-08	D00564.D00565	2669978	0.48128	0.54078	-2344.67	0.6528	0.3434	-2329.01	2669978	0.48128	0.55341	-2672.55	0.55639	0.54564	-2672.52	0.53269	0.5597	-2672.4	0.53267	0.57615	0.53841	-2672.24	D00564.D00565	2669978	0.48128	0.58523	0.3562	-5005.26	0.65297	0.34362	0.55341	-5001.55
31.3308	2.176e-08	C00618	14112436	0.83957	0.65559	-1872.31	0.76267	0.15748	-1856.65	14112436	0.83957	0.75686	-2736.01	0.78179	0.70758	-2735.67	0.69454	0.76791	-2735.67	0.69417	0.82285	0.68897	-2734.76	C00618	14112436	0.83957	0.75891	0.15942	-4557.6	0.76252	0.1594	0.75613	-4557.6
31.195	2.33366e-08	M01491	18646668	0.52406	0.32201	-285.976	0.15373	0.73826	-270.379	18646668	0.52406	0.299	-500.668	0.32072	0.24564	-500.205	0.41623	0.26177	-497.623	0.41623	0.24916	0.28188	-497.557	M01491	18646668	0.52406	0.26197	0.6891	-775.537	0.15362	0.7383	0.29889	-771.047
31.051	2.51337e-08	J00540	2855419	0.90374	0.75422	-1908.31	0.97075	0.30638	-1892.79	2855419	0.90374	0.75602	-2803.95	0.94367	0.41287	-2791.43	0.99999	0.67704	-2796.74	1	0.86614	0.43124	-2789.97	J00540	2855419	0.90374	0.81855	0.3338	-4700.72	0.97042	0.30677	0.75538	-4696.74
30.9994	2.58108e-08	N01101	7915227	0.76471	0.86687	-3206.12	0.92914	0.55145	-3190.62	7915227	0.76471	0.86295	-3478.88	0.90215	0.74781	-3476.89	0.81878	0.87061	-3478.57	0.81842	0.9265	0.73329	-3475.6	N01101	7915227	0.76471	0.89469	0.54973	-6630.02	0.92907	0.54636	0.86277	-6627.86
30.977	2.61104e-08	B01346	15613541	0.25668	0.18931	-1685.96	0.27241	0.03408	-1670.47	15613541	0.25668	0.23926	-2487.82	0.25666	0.20405	-2487.27	0.13956	0.26558	-2483.93	0.13946	0.32223	0.18768	-2481.04	B01346	15613541	0.25668	0.24998	0.0356	-4158.76	0.27273	0.03405	0.23912	-4158.29
30.967	2.62453e-08	H01862	18401154	0.72727	0.71077	-1862.18	0.59826	0.95013	-1846.7	18401154	0.72727	0.75328	-2559.5	0.73486	0.78622	-2559.02	0.66732	0.77446	-2557.48	0.66732	0.77269	0.77758	-2557.48	H01862	18401154	0.72727	0.70372	0.92285	-4414.14	0.5983	0.94923	0.75287	-4406.2
30.8144	2.83923e-08	J01084	7418280	0.70588	0.61744	-2523.47	0.52897	0.83426	-2508.06	7418280	0.70588	0.60936	-3292.59	0.62444	0.5763	-3292.14	0.5989	0.61185	-3292.55	0.59889	0.63862	0.57229	-3291.86	J01084	7418280	0.70588	0.58278	0.82322	-5706.99	0.52938	0.83126	0.60922	-5704.36
30.7954	2.86717e-08	N02512	21880064	0.58824	0.61429	-430.18	0.40836	1	-414.783	21880064	0.58824	0.46846	-663.39	0.44581	0.51397	-663.23	0.57664	0.44708	-662.739	0.57674	0.38538	0.53939	-662.068	N02512	21880064	0.58824	0.45042	1	-1078.47	0.40806	1	0.46828	-1078.17
30.7792	2.8912e-08	C01241	18149570	0.84492	0.69978	-2276.78	0.82396	0.43794	-2261.39	18149570	0.84492	0.71406	-3093	0.7264	0.68317	-3092.75	0.73589	0.70765	-3092.9	0.73549	0.72614	0.68317	-3092.73	C01241	18149570	0.84492	0.75048	0.44757	-5304.47	0.82359	0.43191	0.71388	-5301.29
30.7438	2.94443e-08	D02177.D02178.D02179.D02180	18420852	0.49198	0.11831	-3056.9	0.03915	0.45003	-3041.52	18420852	0.49198	0.09203	-4553.32	0.07982	0.12349	-4552.93	0.14205	0.07646	-4552.53	0.14313	0.04205	0.13071	-4551.22	D02177.D02178.D02179.D02180	18420852	0.49198	0.06943	0.45172	-7500.79	0.03832	0.46138	0.09154	-7499.28
30.7172	2.98507e-08	B01629.B01630	17602836	0.7754	0.82311	-1198.09	0.93553	0.42875	-1182.74	17602836	0.7754	0.78442	-2124.93	0.81021	0.72023	-2124.3	0.74986	0.79104	-2124.76	0.74979	0.83507	0.70717	-2123.63	B01629.B01630	17602836	0.7754	0.83347	0.47076	-3314.67	0.93554	0.42902	0.78436	-3307.67
30.707	3.00081e-08	L00438	5913765	0.46524	0.79147	-1590.31	0.64213	0.97313	-1574.95	5913765	0.46524	0.59709	-2535.02	0.60033	0.58975	-2535.01	0.77566	0.54754	-2529.88	0.77568	0.48128	0.63092	-2528.59	L00438	5913765	0.46524	0.61123	0.97637	-4110.31	0.64092	0.97355	0.59736	-4109.97
30.6844	3.03596e-08	L00510	6573240	0.34759	0.5402	-329.192	0.37376	1	-313.85	6573240	0.34759	0.52604	-458.109	0.52154	0.53657	-458.095	0.49686	0.53013	-458.069	0.49699	0.52631	0.53509	-458.067	L00510	6573240	0.34759	0.47136	1	-774.751	0.37383	1	0.52604	-771.959
30.6576	3.07819e-08	I01080	14533662	0.56684	0.68581	-457.326	0.57668	0.98594	-441.997	14533662	0.56684	0.61844	-1075.39	0.62026	0.61117	-1075.38	0.72901	0.58794	-1072.74	0.72901	0.5476	0.65885	-1072.1	I01080	14533662	0.56684	0.60367	0.9793	-1517.85	0.57663	0.98571	0.61845	-1517.38
30.6386	3.10848e-08	C01102	17423661	0.82353	0.85101	-730.295	0.99275	0.4137	-714.976	17423661	0.82353	0.76989	-1004.73	0.8032	0.70813	-1004.36	0.87004	0.75038	-1003.93	0.87004	0.7675	0.72785	-1003.88	C01102	17423661	0.82353	0.85263	0.48267	-1729.21	0.99267	0.41352	0.77031	-1719.71
30.5682	3.22334e-08	M00238	4117830	0.52406	0.34855	-929.732	0.47632	0	-914.448	4117830	0.52406	0.41585	-1483.8	0.41072	0.43072	-1483.77	0.40849	0.41885	-1483.79	0.40835	0.40928	0.43138	-1483.77	M00238	4117830	0.52406	0.43587	1e-05	-2398.86	0.47625	0	0.41622	-2398.25
30.5506	3.25271e-08	J01504	16651283	0.8984	0.68294	-316.006	0.46714	1	-300.731	16651283	0.8984	0.83877	-649.274	0.83403	0.85184	-649.253	0.99584	0.81849	-647.966	0.99569	0.78438	0.87184	-647.641	J01504	16651283	0.8984	0.73338	1	-963.136	0.46713	1	0.83863	-950.005
30.5422	3.26683e-08	G00266	1529690	0.25134	0.37324	-1111.68	0.27369	0.66303	-1096.41	1529690	0.25134	0.38951	-1799.79	0.40449	0.36151	-1799.55	0.36607	0.39485	-1799.67	0.36606	0.42521	0.35497	-1799.16	G00266	1529690	0.25134	0.34893	0.64579	-2900.64	0.27358	0.66268	0.38944	-2896.2
30.4874	3.36042e-08	L01225	22396415	0.95187	0.90166	-1775.54	0.95854	0.67273	-1760.29	22396415	0.95187	0.95408	-1947.01	0.95631	0.94648	-1946.97	0.95583	0.95356	-1947.01	0.95549	0.95812	0.94574	-1946.96	L01225	22396415	0.95187	0.95618	0.67378	-3707.33	0.95864	0.67252	0.9539	-3707.31
30.478	3.37674e-08	N01362.N01363	9757317	0.87701	0.88338	-1796.65	0.99999	0.40324	-1781.41	9757317	0.87701	0.89457	-2855.94	0.89598	0.89024	-2855.94	0.83922	0.9052	-2855.51	0.83942	0.915	0.88379	-2855.42	N01362.N01363	9757317	0.87701	0.92394	0.42928	-4640.95	0.99999	0.40237	0.89467	-4637.35
30.4698	3.39105e-08	F01211	6187458	0.37968	0.32929	-1435.13	0.47661	0.09298	-1419.9	6187458	0.37968	0.3427	-2444.82	0.35148	0.32032	-2444.63	0.32943	0.34579	-2444.78	0.32943	0.36741	0.31529	-2444.42	F01211	6187458	0.37968	0.37563	0.12677	-3869.5	0.47593	0.09368	0.34272	-3864.72
30.4552	3.41666e-08	E01048	12890332	0.88235	0.81529	-1857.63	0.91866	0.53885	-1842.41	12890332	0.88235	0.85701	-2765.69	0.85258	0.87081	-2765.62	0.71996	0.87762	-2762.48	0.71995	0.89581	0.84549	-2762.16	E01048	12890332	0.88235	0.87598	0.55373	-4609.94	0.91834	0.53894	0.85657	-4608.09
30.4524	3.4216e-08	L00157	1104344	0.70053	0.8123	-939.21	0.73449	0.99995	-923.983	1104344	0.70053	0.7932	-1352.69	0.76873	0.85352	-1351.3	0.76402	0.80468	-1352.21	0.76407	0.77191	0.85244	-1351.28	L00157	1104344	0.70053	0.774	0.99373	-2278.2	0.73448	0.99984	0.79311	-2276.67
30.4168	3.48497e-08	F00864.F00865	4173574	0.78075	0.85854	-1651.51	0.78444	1	-1636.3	4173574	0.78075	0.81661	-2529.22	0.80796	0.8416	-2528.98	0.87398	0.79944	-2527.94	0.87385	0.75443	0.86111	-2526.62	F00864.F00865	4173574	0.78075	0.8057	1	-4075.9	0.78331	1	0.81685	-4075.47
30.4032	3.50949e-08	B01042	10733424	0.29947	0.59452	-1467.54	0.77694	0.30075	-1452.34	10733424	0.29947	0.61938	-1852.06	0.68014	0.48819	-1849.81	0.72679	0.58611	-1849.9	0.72679	0.6391	0.51175	-1849.21	B01042	10733424	0.29947	0.66434	0.30284	-3125.67	0.77787	0.26399	0.61948	-3121.17
30.3932	3.52763e-08	F01594	15794827	0.48663	0.22415	-558.546	0.10927	0.70971	-543.35	15794827	0.48663	0.26143	-932.9	0.28987	0.20742	-932.361	0.30339	0.25373	-932.696	0.30339	0.28435	0.20954	-932.338	F01594	15794827	0.48663	0.21089	0.65945	-1482.34	0.10928	0.70943	0.26158	-1476.25
30.38	3.55171e-08	I00920	13634151	0.94652	0.66614	-795.068	0.95822	0.1046	-779.878	13634151	0.94652	0.71924	-1483.87	0.7774	0.5973	-1482.9	0.45243	0.76127	-1480.64	0.45243	0.90585	0.51837	-1476.62	I00920	13634151	0.94652	0.77612	0.18821	-2268.78	0.9577	0.1054	0.7187	-2263.74
30.3782	3.55501e-08	D01992	17399119	0.60428	0.52247	-1186.02	0.63704	0.22122	-1170.83	17399119	0.60428	0.56223	-1914.12	0.54342	0.59723	-1913.78	0.4641	0.57915	-1912.78	0.46416	0.57307	0.58792	-1912.76	D01992	17399119	0.60428	0.58663	0.23155	-3086.45	0.63686	0.22155	0.56198	-3084.94
30.0918	4.1207e-08	J01756.J01757.J01758	18572722	0.94118	0.93286	-8645.59	0.9831	0.85992	-8630.54	18572722	0.94118	0.96502	-8226.7	0.96429	0.96655	-8226.69	0.93911	0.97263	-8225.09	0.93919	0.9785	0.96466	-8224.75	J01756.J01757.J01758	18572722	0.94118	0.97077	0.87307	-16046.9	0.98277	0.87307	0.96459	-16045.6
29.9978	4.32537e-08	H00961	7117951	0.52941	0.76239	-976.151	0.61895	1	-961.152	7117951	0.52941	0.71447	-1513.51	0.63979	0.8757	-1509.89	0.68257	0.72256	-1513.36	0.68257	0.61094	0.8893	-1509.53	H00961	7117951	0.52941	0.68419	0.99447	-2476.28	0.6188	0.99999	0.71417	-2474.66
29.8824	4.59061e-08	F00084	421405	0.68984	0.52755	-362.236	0.33017	0.97239	-347.295	421405	0.68984	0.6735	-925.56	0.67137	0.68008	-925.553	0.58978	0.68907	-924.807	0.58991	0.69885	0.67044	-924.749	F00084	421405	0.68984	0.59479	0.88543	-1287.33	0.33093	0.97154	0.67334	-1272.86
29.8524	4.66219e-08	A00089	407805	0.44385	0.27288	-861.257	0.13663	0.5816	-846.331	407805	0.44385	0.19942	-1352.56	0.18558	0.22525	-1352.36	0.18568	0.20266	-1352.52	0.18544	0.18571	0.22517	-1352.36	A00089	407805	0.44385	0.18099	0.56088	-2200.15	0.13664	0.58163	0.19949	-2198.89
29.7974	4.79635e-08	H01950	18924003	0.6631	0.6091	-2484.89	0.69771	0.40689	-2469.99	18924003	0.6631	0.60676	-3096.73	0.60318	0.61631	-3096.7	0.56077	0.62035	-3095.97	0.56093	0.63019	0.60627	-3095.9	H01950	18924003	0.6631	0.63801	0.41356	-5570.36	0.69718	0.40702	0.60646	-5566.72
29.7322	4.9604e-08	C00090	3201252	0.8984	0.4488	-940.157	0.27089	0.85187	-925.291	3201252	0.8984	0.54867	-1541.84	0.41711	0.83317	-1531.39	0.3292	0.60029	-1535.72	0.32884	0.46435	0.81658	-1530.08	C00090	3201252	0.8984	0.46606	0.74838	-2479.75	0.27182	0.85135	0.54844	-2467.13
29.6202	5.25544e-08	D01931	16949550	0.94118	0.75341	-1221.93	0.91014	0.39819	-1207.12	16949550	0.94118	0.81428	-2362.01	0.82923	0.7744	-2361.75	0.82908	0.80891	-2361.95	0.82909	0.82923	0.7744	-2361.75	D01931	16949550	0.94118	0.83736	0.42026	-3571.01	0.91012	0.39833	0.81384	-3569.13
29.6146	5.27064e-08	J01702	18268428	0.42781	0.5649	-567.666	0.68647	0.23122	-552.858	18268428	0.42781	0.56468	-778.606	0.56386	0.56729	-778.605	0.50213	0.57764	-778.052	0.50213	0.59608	0.55044	-777.929	J01702	18268428	0.42781	0.6072	0.25807	-1335.16	0.68628	0.23154	0.56463	-1331.46
29.604	5.29955e-08	A00239	1137700	0.48128	0.48892	-494.076	0.33036	0.93035	-479.274	1137700	0.48128	0.4926	-1049.82	0.52778	0.41868	-1048.88	0.5829	0.47194	-1048.66	0.5829	0.50035	0.43021	-1048.36	A00239	1137700	0.48128	0.44851	0.89376	-1533.62	0.33034	0.93032	0.49243	-1529.1
29.4992	5.59398e-08	H01095	9822623	0.26203	0.41272	-1299.12	0.28469	0.71859	-1284.37	9822623	0.26203	0.39028	-2012.2	0.3817	0.40901	-2012.08	0.50847	0.36937	-2010.2	0.50847	0.32672	0.42432	-2009.2	H01095	9822623	0.26203	0.35952	0.70045	-3299.25	0.28462	0.71825	0.39033	-3296.57
29.49	5.6206e-08	A00901	5520238	0.67914	0.66739	-903.995	0.83206	0.19938	-889.25	5520238	0.67914	0.68528	-1614.21	0.69267	0.66173	-1614.13	0.44845	0.72153	-1609.79	0.44845	0.79791	0.59953	-1607.87	A00901	5520238	0.67914	0.72807	0.25015	-2507.43	0.83187	0.19989	0.68515	-2503.46
29.4822	5.64326e-08	F00913	4385359	0.14973	0.48041	-974.805	0.34364	0.79835	-960.064	4385359	0.14973	0.322	-1694.92	0.31587	0.34074	-1694.84	0.41139	0.30259	-1693.62	0.4115	0.26883	0.35712	-1692.94	F00913	4385359	0.14973	0.32847	0.80078	-2655.08	0.34326	0.79833	0.32234	-2654.98
29.4424	5.76035e-08	M00942.M00943.M00944	16159156	0.86096	0.70785	-2282.58	0.79862	0.45367	-2267.86	16159156	0.86096	0.73977	-2806.84	0.7369	0.7448	-2806.83	0.73345	0.74034	-2806.83	0.73344	0.73754	0.74452	-2806.83	M00942.M00943.M00944	16159156	0.86096	0.75991	0.46005	-5076.13	0.79833	0.45363	0.73911	-5074.7
29.366	5.99197e-08	F01346	8161585	0.64171	0.4786	-346.759	0.32978	0.99999	-332.076	8161585	0.64171	0.40276	-589.951	0.38154	0.44267	-589.759	0.48369	0.39192	-589.591	0.48414	0.34836	0.45507	-589.079	F01346	8161585	0.64171	0.37788	0.99997	-922.774	0.32982	0.99999	0.40302	-922.027
29.3506	6.03978e-08	K00513	2598347	0.90374	0.90223	-614.671	0.9734	0.68513	-599.995	2598347	0.90374	0.91334	-1267.12	0.91253	0.91512	-1267.11	0.8874	0.91851	-1266.82	0.88739	0.92367	0.91182	-1266.78	K00513	2598347	0.90374	0.93258	0.70356	-1871.13	0.97337	0.68487	0.91343	-1867.11
29.3078	6.17466e-08	H01150	11313529	0.10695	0.15141	-2058.48	0.07403	0.31938	-2043.83	11313529	0.10695	0.17035	-2983.66	0.15338	0.20447	-2982.99	0.17294	0.16959	-2983.66	0.17294	0.14323	0.20816	-2982.78	H01150	11313529	0.10695	0.13852	0.30768	-4971.65	0.0736	0.32156	0.1705	-4965.06
29.3064	6.17913e-08	J01666	18085894	0.63636	0.68706	-1658.1	0.83291	0.31367	-1643.44	18085894	0.63636	0.7417	-2639.42	0.73445	0.76507	-2639.33	0.73161	0.74435	-2639.4	0.73156	0.73052	0.76668	-2639.32	J01666	18085894	0.63636	0.76795	0.32497	-4284.37	0.83232	0.31391	0.74168	-4282.86
29.1634	6.65241e-08	G00959	9100117	0.90374	0.77922	-2303.45	0.59929	1	-2288.87	9100117	0.90374	0.83849	-2571.1	0.80605	0.90976	-2570.74	0.83454	0.83849	-2571.1	0.83453	0.79395	0.9163	-2570.68	G00959	9100117	0.90374	0.75562	0.99999	-4774.45	0.59942	0.99999	0.83834	-4768.38
29.1032	6.86235e-08	M01256	17659960	0.07487	0.19756	-574.178	0.30691	0	-559.627	17659960	0.07487	0.26571	-959.384	0.27221	0.24911	-959.337	0.1814	0.28306	-958.631	0.18173	0.31803	0.23431	-958.237	M01256	17659960	0.07487	0.28059	0	-1519.31	0.30718	0	0.26557	-1519.01
29.0664	6.99395e-08	N02594	22365182	0.13369	0.19569	-3261.72	0.10085	0.39129	-3247.19	22365182	0.13369	0.0803	-4381.98	0.07818	0.08594	-4381.96	0.09782	0.07665	-4381.86	0.09729	0.06936	0.08971	-4381.77	N02594	22365182	0.13369	0.08698	0.39406	-7577.13	0.09941	0.39129	0.07995	-7576.88
29.041	7.08625e-08	N02673	22825748	0.41176	0.38503	-1394.16	0.47622	0.14994	-1379.64	22825748	0.41176	0.41293	-1896.27	0.41925	0.39454	-1896.16	0.51478	0.39071	-1894.04	0.51491	0.37848	0.40998	-1893.93	N02673	22825748	0.41176	0.43547	0.15749	-3277.31	0.4765	0.14939	0.41295	-3275.91
29.0408	7.08699e-08	F01869	17956970	0.87701	0.72968	-2029.84	0.91938	0.28014	-2015.32	17956970	0.87701	0.91795	-3636.14	0.94361	0.86556	-3635.56	0.99998	0.89282	-3634.24	0.99999	0.90734	0.87169	-3634.15	F01869	17956970	0.87701	0.91858	0.28085	-5651.46	0.91886	0.28083	0.91823	-5651.46
29.0082	7.20726e-08	E00486.E00487	2732419	0.80214	0.8247	-2826.48	0.75677	0.9518	-2811.98	2732419	0.80214	0.81481	-3360.6	0.80404	0.83544	-3360.22	0.85289	0.80345	-3359.66	0.85308	0.77503	0.84019	-3358.41	E00486.E00487	2732419	0.80214	0.79565	0.94877	-6174.74	0.75707	0.95207	0.81473	-6172.58
28.9618	7.38198e-08	H00201	1063103	0.95187	0.93048	-929.313	0.87545	1	-914.832	1063103	0.95187	0.93507	-1263.89	0.92314	0.95621	-1263.2	0.92349	0.93846	-1263.72	0.92347	0.92222	0.95619	-1263.2	H00201	1063103	0.95187	0.91554	1	-2182.71	0.87536	1	0.93505	-2178.72
28.9492	7.43015e-08	J00582	3266940	0.60963	0.5796	-538.337	0.47867	0.87015	-523.862	3266940	0.60963	0.53902	-1045.59	0.5417	0.53052	-1045.57	0.59634	0.52597	-1044.96	0.59634	0.51611	0.54206	-1044.91	J00582	3266940	0.60963	0.51845	0.86122	-1570.49	0.47872	0.86996	0.53898	-1569.45
28.903	7.6095e-08	J01826	18996438	0.36898	0.31842	-134.085	0.14583	0.8927	-119.633	18996438	0.36898	0.42328	-215.499	0.47456	0.31856	-214.94	0.5685	0.39885	-214.401	0.56849	0.42237	0.361	-214.335	J01826	18996438	0.36898	0.33438	0.81303	-344.286	0.14576	0.89244	0.42313	-335.133
28.8938	7.64573e-08	H02446	24296049	0.48663	0.40675	-1438.66	0.53013	0.19402	-1424.21	24296049	0.48663	0.4273	-2093.45	0.44986	0.38366	-2092.77	0.3851	0.43929	-2092.97	0.38492	0.48871	0.37509	-2091.36	H02446	24296049	0.48663	0.45809	0.20801	-3520.6	0.53026	0.19326	0.42719	-3517.67
28.8222	7.93365e-08	N01176	8438223	0.31016	0.45425	-2718.53	0.35794	0.63605	-2704.12	8438223	0.31016	0.38991	-3947.24	0.36784	0.43575	-3946.28	0.40429	0.38537	-3947.15	0.40429	0.34407	0.44126	-3945.58	N01176	8438223	0.31016	0.37957	0.63396	-6651.79	0.3582	0.63644	0.38992	-6651.35
28.6626	8.61516e-08	H00137	661236	0.94652	0.73757	-1533.92	0.87402	0.43746	-1519.59	661236	0.94652	0.82083	-2302.94	0.89718	0.65832	-2298.71	0.92821	0.78918	-2301.07	0.92809	0.8801	0.66441	-2298.52	H00137	661236	0.94652	0.83784	0.44193	-3823.05	0.87383	0.43742	0.82027	-3822.53
28.6374	8.72801e-08	H00269	1465110	0.46524	0.78995	-629.236	0.96798	0.43441	-614.917	1465110	0.46524	0.84665	-930.697	0.81744	0.90412	-929.992	0.82177	0.85205	-930.593	0.8218	0.81343	0.90594	-929.985	H00269	1465110	0.46524	0.87652	0.48153	-1549.88	0.96875	0.43364	0.84668	-1545.61
28.627	8.77501e-08	K00515	2624891	0.26738	0.28485	-1147.24	0.37357	0.02476	-1132.92	2624891	0.26738	0.25139	-1893.19	0.25601	0.23881	-1893.13	0.26732	0.24764	-1893.12	0.2677	0.25329	0.23958	-1893.1	K00515	2624891	0.26738	0.29205	0.04003	-3031.35	0.37377	0.02492	0.2514	-3026.11
28.6164	8.82317e-08	I00857	13206402	0.18182	0.637	-207.312	0.7939	0.06231	-193.004	13206402	0.18182	0.63079	-304.984	0.71628	0.46077	-302.795	0.70329	0.61669	-304.616	0.7033	0.7236	0.45687	-302.778	I00857	13206402	0.18182	0.68651	0.10331	-501.58	0.7939	0.06281	0.63071	-497.988
28.5752	9.01292e-08	G00447	2865458	0.96791	0.89905	-2133.3	0.96865	0.68337	-2119.02	2865458	0.96791	0.95325	-2899.9	0.95443	0.94938	-2899.89	0.91364	0.96744	-2898.89	0.91364	0.98735	0.93858	-2898.35	G00447	2865458	0.96791	0.96101	0.68608	-4952.65	0.97419	0.68204	0.953	-4952.26
28.545	9.15459e-08	D01302	7308351	0.93048	0.77888	-1053.34	0.91725	0.20165	-1039.07	7308351	0.93048	0.873	-1697.36	0.83012	0.93381	-1696.53	0.64417	0.89412	-1695.16	0.64417	0.8721	0.923	-1694.97	D01302	7308351	0.93048	0.8887	0.21206	-2736.81	0.91708	0.2018	0.87221	-2736.44
28.5438	9.16027e-08	D00886	4309063	0.51872	0.42898	-1556.93	0.28102	0.89144	-1542.66	4309063	0.51872	0.3636	-2625.83	0.36061	0.37253	-2625.82	0.55508	0.32703	-2621.96	0.55505	0.27668	0.41057	-2620.89	D00886	4309063	0.51872	0.33975	0.86382	-4169.67	0.28092	0.89076	0.36297	-4168.5
28.542	9.16879e-08	E01331	16649995	0.95722	0.84357	-3577.73	0.95395	0.66716	-3563.46	16649995	0.95722	0.82979	-4790.06	0.86671	0.75047	-4787.3	0.8398	0.82651	-4790.02	0.83932	0.88135	0.74566	-4786.92	E01331	16649995	0.95722	0.86324	0.68972	-8213.42	0.95643	0.67007	0.82878	-8205.72
28.5156	9.29466e-08	D02517	20788806	0.95187	0.90797	-968.119	1	0.30702	-953.861	20788806	0.95187	0.906	-1915.09	0.90843	0.89768	-1915.08	0.7023	0.93517	-1911.15	0.70225	0.9668	0.87379	-1910.31	D02517	20788806	0.95187	0.93598	0.33574	-2872.46	0.99999	0.30728	0.90594	-2868.95
28.5098	9.32254e-08	N00795	4713661	0.65775	0.75942	-2810.26	0.68931	0.91025	-2796	4713661	0.65775	0.76286	-3426.57	0.75809	0.77323	-3426.49	0.75593	0.76462	-3426.55	0.75656	0.75784	0.77289	-3426.49	N00795	4713661	0.65775	0.73776	0.90753	-6187.54	0.68933	0.9096	0.76284	-6184.59
28.3882	9.92685e-08	C00262	5748344	0.69519	0.41191	-1100.7	0.54276	0.12588	-1086.5	5748344	0.69519	0.47969	-1711	0.47156	0.50019	-1710.89	0.43287	0.49313	-1710.52	0.43286	0.49324	0.49299	-1710.52	C00262	5748344	0.69519	0.49872	0.13812	-2798.44	0.54266	0.12627	0.47935	-2797.5
28.3808	9.96487e-08	F01108.F01109	5375443	0.34759	0.4146	-4335.05	0.32398	0.60001	-4320.86	5375443	0.34759	0.38317	-5433.57	0.38135	0.38792	-5433.56	0.38295	0.38317	-5433.57	0.38282	0.3799	0.38792	-5433.56	F01108.F01109	5375443	0.34759	0.36212	0.58993	-9561.07	0.3209	0.59223	0.38286	-9559.47
28.2578	1.06186e-07	M01525	18809087	0.96257	0.84481	-2985.84	0.91431	0.65385	-2971.72	18809087	0.96257	0.88301	-4158.98	0.86803	0.91902	-4158.18	0.80324	0.90845	-4154.89	0.8032	0.91061	0.90494	-4154.88	M01525	18809087	0.96257	0.8936	0.65728	-7131.49	0.91423	0.65377	0.8832	-7130.7
28.225	1.08001e-07	F00322.F00323	1512631	0.95722	0.67682	-504.357	0.9151	0.1398	-490.245	1512631	0.95722	0.89869	-898.98	0.96999	0.80371	-898.463	0.83621	0.90537	-898.895	0.83621	0.99998	0.79008	-898	F00322.F00323	1512631	0.95722	0.90368	0.14087	-1389.24	0.91504	0.14067	0.89833	-1389.22
28.2144	1.08594e-07	A00468	2454704	0.87701	0.88294	-3748.38	0.81808	0.99865	-3734.27	2454704	0.87701	0.88322	-4185.13	0.90013	0.85171	-4184.08	0.92356	0.87326	-4184.02	0.92371	0.88834	0.85314	-4183.6	A00468	2454704	0.87701	0.86197	0.99344	-7790.15	0.81607	0.99852	0.88323	-7786.97
28.167	1.11286e-07	M01197.M01198	17403542	0.94118	0.90766	-4841.43	0.96489	0.68664	-4827.34	17403542	0.94118	0.87357	-4574.43	0.86667	0.89371	-4574.23	0.80199	0.88944	-4572.59	0.80283	0.8942	0.88159	-4572.56	M01197.M01198	17403542	0.94118	0.90703	0.68454	-8954.66	0.96426	0.66468	0.87363	-8947.31
28.149	1.12326e-07	J01641	17920545	0.06952	0.26324	-1322.33	0.12523	0.56465	-1308.25	17920545	0.06952	0.23539	-1751.05	0.21959	0.26972	-1750.85	0.39932	0.1993	-1747.45	0.39931	0.13681	0.30179	-1745.53	J01641	17920545	0.06952	0.20029	0.54825	-3061.79	0.12516	0.56454	0.23571	-3059.3
28.0736	1.16788e-07	C00398	9725417	0.85027	0.28673	-351.959	0.39951	0	-337.922	9725417	0.85027	0.46759	-1030.57	0.48948	0.42225	-1030.15	0.33168	0.50117	-1027.39	0.33156	0.57886	0.39054	-1024.8	C00398	9725417	0.85027	0.44597	0	-1369.5	0.39962	0	0.4673	-1368.5
28.0652	1.17296e-07	N03126	25081891	0.6631	0.57502	-1466.91	0.6848	0.30032	-1452.87	25081891	0.6631	0.69106	-2511.91	0.73952	0.57944	-2508.65	0.7139	0.68324	-2511.75	0.71349	0.75931	0.5738	-2508.35	N03126	25081891	0.6631	0.68903	0.29991	-3964.79	0.68485	0.29991	0.69108	-3964.78
28.018	1.20192e-07	A01164	11587559	0.6631	0.66985	-2702.61	0.5313	0.96086	-2688.6	11587559	0.6631	0.71312	-4082.76	0.68782	0.76178	-4082.09	0.66542	0.72826	-4082.27	0.66546	0.70221	0.75904	-4081.96	A01164	11587559	0.6631	0.65958	0.93279	-6686.84	0.53347	0.9574	0.71336	-6680.49
28.0132	1.20491e-07	J00024	131772	0.73797	0.61094	-771.344	0.6879	0.23391	-757.338	131772	0.73797	0.64257	-1133.97	0.63084	0.67154	-1133.79	0.5555	0.66787	-1132.14	0.5555	0.6747	0.65518	-1132.11	J00024	131772	0.73797	0.65908	0.24194	-1858.73	0.68689	0.23778	0.64232	-1858.08
27.9822	1.22437e-07	D01485	9085719	0.87166	0.39116	-685.93	0.57797	0.00693	-671.938	9085719	0.87166	0.6283	-1279.65	0.63402	0.61428	-1279.62	0.5173	0.64593	-1278.8	0.5173	0.67624	0.60357	-1278.49	D01485	9085719	0.87166	0.61361	8e-05	-1951.89	0.57866	0.00636	0.62783	-1951.59
27.922	1.26305e-07	B00857	5281054	0.6738	0.69813	-1278.26	0.53562	0.95494	-1264.3	5281054	0.6738	0.60348	-2365.32	0.48395	0.84475	-2358.72	0.5033	0.63076	-2363.97	0.50327	0.47012	0.85145	-2358.66	B00857	5281054	0.6738	0.58277	0.94047	-3585.79	0.53406	0.95299	0.6029	-3585.07
27.9092	1.27144e-07	B01670	17834205	0.87166	0.89447	-1683.92	0.96247	0.70513	-1669.97	17834205	0.87166	0.8726	-1947.68	0.88388	0.84894	-1947.41	0.83414	0.88229	-1946.97	0.83417	0.92097	0.82777	-1945.51	B01670	17834205	0.87166	0.90205	0.73493	-3470.69	0.96232	0.70346	0.87244	-3463.02
27.7072	1.41136e-07	C00864	16073888	0.79679	0.63708	-855.347	0.46492	1	-841.493	16073888	0.79679	0.64294	-1182.5	0.64628	0.63321	-1182.49	0.66205	0.63878	-1182.46	0.66182	0.64172	0.63524	-1182.46	C00864	16073888	0.79679	0.59267	0.99998	-1988.4	0.46853	0.99999	0.64269	-1984.4
27.6184	1.47766e-07	K00499	2515876	0.63636	0.59336	-2011.06	0.73242	0.29679	-1997.25	2515876	0.63636	0.67514	-3126.39	0.68747	0.64292	-3126.19	0.6255	0.68998	-3126	0.62541	0.73232	0.63132	-3125.33	K00499	2515876	0.63636	0.69349	0.29681	-5088.74	0.73233	0.29217	0.6752	-5088.18
27.5638	1.51997e-07	L01839.L01840	25595574	0.95722	0.72719	-988.252	0.8602	0.23708	-974.47	25595574	0.95722	0.802	-1959.54	0.83115	0.7423	-1959	0.83805	0.79666	-1959.45	0.8379	0.83029	0.7423	-1959	L01839.L01840	25595574	0.95722	0.81992	0.24875	-2934.57	0.85987	0.2375	0.80146	-2934.01
27.5624	1.52107e-07	B00888	5834246	0.82888	0.7248	-1457.23	0.85031	0.36366	-1443.45	5834246	0.82888	0.70447	-2356.44	0.69701	0.72951	-2356.34	0.57052	0.74353	-2353.28	0.57052	0.76721	0.7016	-2353	B00888	5834246	0.82888	0.7499	0.39262	-3804.34	0.84991	0.36396	0.70423	-3799.89
27.513	1.56042e-07	M01576	19135441	0.60428	0.37463	-781.05	0.53745	0	-767.293	19135441	0.60428	0.56489	-1196.17	0.59168	0.50981	-1195.92	0.42559	0.59744	-1195.01	0.42558	0.67537	0.48543	-1193.91	M01576	19135441	0.60428	0.55581	0	-1963.52	0.53753	0	0.56485	-1963.46
27.4968	1.57355e-07	F01677.F01678	16616304	0.43316	0.40212	-573.557	0.26978	0.8368	-559.809	16616304	0.43316	0.3263	-1326.87	0.34409	0.28683	-1326.65	0.33931	0.32275	-1326.84	0.33931	0.34722	0.28545	-1326.65	F01677.F01678	16616304	0.43316	0.30857	0.82614	-1887.28	0.26974	0.83689	0.32596	-1886.68
27.4908	1.57844e-07	F00566	2634426	0.75401	0.79782	-1719.26	0.71174	0.95457	-1705.52	2634426	0.75401	0.81129	-2347.06	0.80496	0.82886	-2346.89	0.80125	0.81362	-2347.02	0.80197	0.80201	0.82979	-2346.88	F00566	2634426	0.75401	0.77821	0.94415	-4057.12	0.71179	0.95431	0.8115	-4052.57
27.4812	1.58629e-07	F01522	14475709	0.87701	0.67355	-1093.43	0.86579	0.12517	-1079.69	14475709	0.87701	0.58331	-1805.18	0.58206	0.5867	-1805.18	0.48618	0.61239	-1804.04	0.48618	0.64505	0.56572	-1803.77	F01522	14475709	0.87701	0.65838	0.21927	-2893.08	0.86511	0.12566	0.58317	-2884.87
27.4348	1.62481e-07	M00431	6757798	0.93583	0.74947	-1360.72	0.89833	0.4459	-1347	6757798	0.93583	0.83935	-1589.23	0.88477	0.73774	-1586.9	0.85845	0.83306	-1589.13	0.85711	0.91419	0.7258	-1586.42	M00431	6757798	0.93583	0.85479	0.47003	-2899.6	0.89751	0.45387	0.83901	-2898.71
27.3694	1.6807e-07	F01902.F01903	18112679	0.65775	0.6586	-1181.48	0.51859	0.92984	-1167.8	18112679	0.65775	0.6436	-1419.84	0.60146	0.73367	-1418.75	0.64929	0.64187	-1419.83	0.64921	0.56325	0.75256	-1418.2	F01902.F01903	18112679	0.65775	0.60399	0.91387	-2590.57	0.51806	0.92979	0.64352	-2587.64
27.3614	1.68767e-07	J01833	19039088	0.5615	0.67676	-911.02	0.52552	1	-897.339	19039088	0.5615	0.69724	-1480.34	0.73932	0.61546	-1479.41	0.8451	0.67399	-1478.05	0.84437	0.69622	0.64128	-1477.92	J01833	19039088	0.5615	0.64206	0.97219	-2383.18	0.52548	0.99999	0.69723	-2377.68
27.3316	1.71388e-07	L01510.L01511.L01512.L01513	24111788	0.3369	0.29998	-2339.27	0.19681	0.5874	-2325.61	24111788	0.3369	0.30504	-3365	0.29818	0.32414	-3364.89	0.24776	0.31699	-3364.41	0.24776	0.31536	0.32056	-3364.41	L01510.L01511.L01512.L01513	24111788	0.3369	0.27072	0.56658	-5654.42	0.19852	0.58121	0.30498	-5651.07
27.2256	1.81046e-07	C00926	16424574	0.70588	0.5397	-2472.14	0.65798	0.21929	-2458.52	16424574	0.70588	0.59132	-4101.57	0.60323	0.55987	-4101.35	0.49981	0.61657	-4100.05	0.49981	0.66909	0.53937	-4098.73	C00926	16424574	0.70588	0.61441	0.23253	-6516.12	0.65981	0.22336	0.59162	-6515.06
27.2074	1.82758e-07	G00164	970549	0.58289	0.72316	-3747.45	0.64105	0.88227	-3733.84	970549	0.58289	0.66561	-4270.94	0.72304	0.54575	-4265.23	0.72287	0.64956	-4269.74	0.72287	0.72336	0.54566	-4265.22	G00164	970549	0.58289	0.65716	0.88017	-7695.62	0.64156	0.88195	0.66581	-7695.36
27.1982	1.8363e-07	M00708	14775957	0.41176	0.33275	-3435.8	0.41137	0.14037	-3422.2	14775957	0.41176	0.38588	-4227.22	0.3824	0.39433	-4227.19	0.31162	0.40345	-4225.58	0.3116	0.41575	0.38687	-4225.44	M00708	14775957	0.41176	0.39462	0.14409	-7561.18	0.41097	0.14409	0.38597	-7560.92
27.194	1.84029e-07	G00663	4607362	0.55615	0.6409	-657.678	0.89296	0.16615	-644.081	4607362	0.55615	0.73272	-851.297	0.81744	0.55442	-849.792	0.74459	0.72964	-851.288	0.74447	0.88198	0.51482	-849.249	G00663	4607362	0.55615	0.78195	0.2043	-1497.27	0.8926	0.16673	0.73298	-1495.38
27.1692	1.86405e-07	N00260	1211994	0.92513	0.94975	-1135.59	1	0.77755	-1122	1211994	0.92513	0.92502	-1877.61	0.91417	0.94939	-1877.24	0.8905	0.93181	-1877.05	0.89055	0.92419	0.94477	-1876.95	N00260	1211994	0.92513	0.95002	0.79288	-3007.39	1	0.77716	0.92501	-2999.61
27.146	1.88655e-07	E01771	23938842	0.86631	0.9382	-1665.8	1	0.74779	-1652.23	23938842	0.86631	0.86737	-2311.57	0.86188	0.88382	-2311.48	0.87847	0.86524	-2311.54	0.87836	0.84848	0.89099	-2311.34	E01771	23938842	0.86631	0.91268	0.77693	-3976.79	1	0.74759	0.86749	-3963.8
27.0876	1.94441e-07	L01509	24102569	0.7861	0.68572	-1138.95	0.57483	0.99999	-1125.41	24102569	0.7861	0.77641	-1771.37	0.78937	0.74551	-1771.13	0.81944	0.76333	-1770.78	0.8194	0.76995	0.75366	-1770.76	L01509	24102569	0.7861	0.71938	0.97689	-2906.88	0.57511	1	0.77642	-2896.78
27.0778	1.95429e-07	K01131	18223321	0.92513	0.88419	-1795.17	0.96125	0.63091	-1781.63	18223321	0.92513	0.88983	-2344.1	0.89705	0.87177	-2343.94	0.82075	0.89936	-2343.17	0.82074	0.9233	0.86278	-2342.44	K01131	18223321	0.92513	0.91524	0.6523	-4129.37	0.96131	0.63086	0.88978	-4125.74
27.0718	1.96037e-07	F00298.F00299.F00300	1415170	0.94118	0.83951	-2369.12	0.91119	0.64572	-2355.58	1415170	0.94118	0.8831	-3964.06	0.90635	0.82986	-3961.77	0.9102	0.87403	-3963.44	0.9102	0.90365	0.8308	-3961.75	F00298.F00299.F00300	1415170	0.94118	0.89123	0.64885	-6320.29	0.91108	0.64569	0.88247	-6319.64
26.9938	2.04109e-07	L00961	19555496	0.63102	0.6441	-1987.02	0.55406	0.87645	-1973.52	19555496	0.63102	0.65777	-2818.91	0.65659	0.66065	-2818.91	0.7118	0.6431	-2818.1	0.7118	0.62488	0.66688	-2817.86	L00961	19555496	0.63102	0.62312	0.86858	-4795.93	0.55402	0.87626	0.65777	-4792.43
26.9528	2.08485e-07	K00701	5304292	0.98396	0.72169	-795.352	0.90117	0.3024	-781.875	5304292	0.98396	0.95481	-1178.69	0.91447	0.99999	-1177.42	0.80454	0.99318	-1175.64	0.80454	0.97393	0.99999	-1175.51	K00701	5304292	0.98396	0.93908	0.28811	-1961.03	0.90104	0.30152	0.95476	-1960.57
26.9452	2.09306e-07	N03017.N03018	24561714	0.74332	0.90346	-3541.24	0.83844	0.98143	-3527.76	24561714	0.74332	0.89878	-4085.66	0.90776	0.87764	-4085.26	0.97117	0.87869	-4081.45	0.97117	0.87009	0.88852	-4081.36	N03017.N03018	24561714	0.74332	0.87778	0.98007	-7441.55	0.83772	0.98124	0.89877	-7438.91
26.9246	2.11549e-07	B01639.B01640	17649876	0.88235	0.83672	-834.341	0.95864	0.56103	-820.878	17649876	0.88235	0.88465	-1506.16	0.90637	0.84174	-1505.55	0.85244	0.89242	-1505.91	0.85283	0.93676	0.83165	-1504.58	B01639.B01640	17649876	0.88235	0.90702	0.58264	-2329.04	0.95869	0.56082	0.8845	-2327.04
26.8834	2.16107e-07	H01612	16991252	0.89305	0.85058	-1771.21	0.92449	0.63287	-1757.77	16991252	0.89305	0.89099	-2178.26	0.88525	0.90954	-2178.08	0.86246	0.89782	-2177.89	0.86215	0.89231	0.90597	-2177.86	H01612	16991252	0.89305	0.90283	0.64271	-3936.92	0.92434	0.63276	0.89089	-3936.03
26.8534	2.19488e-07	F00252	1192660	0.92513	0.65471	-654.442	0.81095	0.1418	-641.015	1192660	0.92513	0.8773	-1436.85	0.86086	0.9088	-1436.59	0.61664	0.90132	-1432.25	0.61681	0.91095	0.88357	-1432.16	F00252	1192660	0.92513	0.86092	0.13058	-2078.71	0.81101	0.14135	0.8771	-2077.86
26.8432	2.20649e-07	N02544	22071004	0.3262	0.32822	-1447.32	0.41522	0.02431	-1433.89	22071004	0.3262	0.36162	-2524.79	0.39317	0.2798	-2523.34	0.24484	0.39138	-2521.61	0.24513	0.46643	0.25737	-2517.43	N02544	22071004	0.3262	0.37871	0.02912	-3959.47	0.415	0.0244	0.36168	-3958.69
26.8376	2.2129e-07	K00861.K00862	10406551	0.5508	0.81281	-1199.48	0.91328	0.53254	-1186.06	10406551	0.5508	0.79445	-1757.98	0.8029	0.77002	-1757.8	0.76041	0.80321	-1757.7	0.75977	0.83311	0.75916	-1757.13	K00861.K00862	10406551	0.5508	0.83175	0.55532	-2949.05	0.9123	0.53284	0.79396	-2944.04
26.782	2.27749e-07	M01411.M01412	18260604	0.54545	0.6072	-902.992	0.51641	1	-889.601	18260604	0.54545	0.5916	-1394.67	0.61493	0.54284	-1394.34	0.74353	0.55855	-1391.8	0.74353	0.55006	0.57202	-1391.77	M01411.M01412	18260604	0.54545	0.56232	0.99999	-2285.44	0.51636	0.99999	0.59164	-2284.28
26.7434	2.32344e-07	N03266	25674307	0.73797	0.63646	-491.291	0.44926	1	-477.92	25674307	0.73797	0.76644	-841.812	0.74851	0.80327	-841.602	0.70467	0.77503	-841.473	0.70459	0.76265	0.79506	-841.41	N03266	25674307	0.73797	0.69058	0.96239	-1332.64	0.44922	0.99999	0.76651	-1319.73
26.7402	2.32729e-07	F00024	136786	0.07487	0.22924	-560.923	0.09621	0.67933	-547.553	136786	0.07487	0.1519	-922.747	0.18446	0.07294	-922.243	0.2527	0.13695	-922.122	0.2527	0.16135	0.0863	-921.913	F00024	136786	0.07487	0.12837	0.66733	-1470.89	0.0963	0.67925	0.1521	-1470.3
26.6662	2.41815e-07	D02574	21077567	0.58824	0.66306	-1075.53	0.55155	0.93641	-1062.2	21077567	0.58824	0.59815	-1895.76	0.59151	0.6168	-1895.66	0.6143	0.5935	-1895.69	0.61417	0.57232	0.62362	-1895.43	D02574	21077567	0.58824	0.58465	0.9249	-2958.56	0.55157	0.93608	0.59812	-2957.96
26.6662	2.41815e-07	C00579	13762611	0.90374	0.65724	-1159.26	0.79428	0.23459	-1145.93	13762611	0.90374	0.71636	-2142.71	0.78026	0.56809	-2139.82	0.61969	0.73753	-2141.7	0.61967	0.84902	0.5402	-2136.15	C00579	13762611	0.90374	0.74186	0.25128	-3289.72	0.79377	0.23517	0.71651	-3288.64
26.6126	2.48617e-07	D02062	17774772	0.91979	0.82706	-848.373	1	0.42477	-835.067	17774772	0.91979	0.99302	-1171.9	1	0.96047	-1171.42	1	0.99122	-1171.8	1	0.99997	0.96053	-1171.42	D02062	17774772	0.91979	0.99515	0.42613	-2007.08	1	0.42504	0.99301	-2006.96
26.6014	2.50062e-07	N01675	14507700	0.60963	0.41509	-1029.58	0.52674	0.18651	-1016.28	14507700	0.60963	0.5306	-1872.79	0.49684	0.6023	-1871.36	0.52602	0.53201	-1872.78	0.52596	0.47352	0.61086	-1870.99	N01675	14507700	0.60963	0.5293	0.18564	-2889.07	0.52687	0.18668	0.53054	-2889.07
26.5948	2.50918e-07	L00091	625460	0.71123	0.8428	-1376.31	0.91746	0.60248	-1363.01	625460	0.71123	0.86164	-2136.56	0.86009	0.86521	-2136.55	0.88027	0.85756	-2136.42	0.88034	0.84838	0.86934	-2136.34	L00091	625460	0.71123	0.88088	0.6155	-3501.72	0.91761	0.60228	0.86177	-3499.57
26.4562	2.69582e-07	E00683.E00684	4271856	0.57219	0.56043	-1677.48	0.66927	0.28012	-1664.25	4271856	0.57219	0.61	-2372.12	0.61097	0.60756	-2372.11	0.60828	0.61043	-2372.12	0.60829	0.61297	0.60683	-2372.11	E00683.E00684	4271856	0.57219	0.62873	0.29183	-4037.4	0.66906	0.28034	0.61005	-4036.37
26.4212	2.74511e-07	M00661	14298970	0.95187	0.86557	-2616.38	0.93894	0.72283	-2603.17	14298970	0.95187	0.87125	-2352.54	0.88787	0.83541	-2351.9	0.83075	0.88151	-2351.73	0.83116	0.9289	0.81273	-2349.23	M00661	14298970	0.95187	0.89494	0.74812	-4734.84	0.94243	0.73619	0.87119	-4730.22
26.3346	2.87099e-07	F00653	3046010	0.63636	0.70897	-1868.38	0.61715	0.87664	-1855.21	3046010	0.63636	0.70306	-2648.71	0.65956	0.78482	-2645.29	0.70548	0.70269	-2648.71	0.70542	0.63853	0.7881	-2644.58	F00653	3046010	0.63636	0.67358	0.87761	-4460.1	0.61302	0.88811	0.70319	-4456.8
26.2954	2.92986e-07	L01092	21343912	0.27807	0.43983	-748.112	0.54735	0.09015	-734.965	21343912	0.27807	0.40475	-935.454	0.43045	0.35829	-935.13	0.43315	0.4006	-935.387	0.43315	0.42986	0.35882	-935.13	L01092	21343912	0.27807	0.45757	0.11409	-1674.75	0.54724	0.09087	0.40461	-1670.42
26.2916	2.93563e-07	C00402	9784501	0.50802	0.72459	-378.867	0.61054	1	-365.721	9784501	0.50802	0.43828	-638.46	0.40748	0.49157	-638.042	0.63798	0.41621	-636.165	0.63798	0.33742	0.52655	-634.352	C00402	9784501	0.50802	0.49343	1	-1009.09	0.61045	1	0.43832	-1004.18
26.2692	2.96987e-07	B01053	10830690	0.37433	0.53547	-879.788	0.72855	0.14167	-866.653	10830690	0.37433	0.64558	-1515.43	0.70062	0.51796	-1513.75	0.63686	0.64754	-1515.42	0.63686	0.73408	0.50086	-1513.21	B01053	10830690	0.37433	0.66592	0.16144	-2382.89	0.72837	0.14257	0.64558	-2382.09
26.1822	3.10673e-07	I01121.I01122	14728916	0.78075	0.79817	-2288.25	0.91334	0.52424	-2275.15	14728916	0.78075	0.84051	-3608.45	0.84215	0.8358	-3608.44	0.80926	0.8468	-3608.23	0.80929	0.85541	0.83153	-3608.15	I01121.I01122	14728916	0.78075	0.85935	0.52813	-5807.91	0.91331	0.51282	0.84014	-5806.14
26.1084	3.22777e-07	C01109	17465875	0.73797	0.60419	-1511.35	0.71341	0.2326	-1498.3	17465875	0.73797	0.59795	-2448.6	0.55495	0.68771	-2446.98	0.4654	0.62214	-2446.64	0.46538	0.5877	0.67789	-2445.99	C01109	17465875	0.73797	0.63695	0.25253	-3949.96	0.71309	0.23277	0.59787	-3946.9
26.089	3.26036e-07	N01060	7698553	0.70588	0.637	-1631.91	0.7471	0.41844	-1618.86	7698553	0.70588	0.65582	-2335.49	0.61742	0.72408	-2333.9	0.50197	0.69664	-2330.29	0.50229	0.68657	0.70846	-2330.24	N01060	7698553	0.70588	0.68604	0.42928	-3915.35	0.74564	0.41936	0.65581	-3912.99
26.048	3.33034e-07	B01006	8737184	0.78075	0.77124	-1045.52	0.89866	0.41609	-1032.5	8737184	0.78075	0.77071	-1564.91	0.79398	0.71815	-1564.53	0.75578	0.77445	-1564.88	0.75566	0.81687	0.70807	-1564.26	B01006	8737184	0.78075	0.8133	0.44419	-2600.76	0.89865	0.41613	0.77071	-2597.41
26.0438	3.33759e-07	J00771	4555642	0.56684	0.4371	-383.012	0.60027	0.05553	-369.99	4555642	0.56684	0.61826	-1287.09	0.59704	0.67167	-1286.77	0.4692	0.64469	-1285.14	0.46936	0.6398	0.65429	-1285.13	J00771	4555642	0.56684	0.61327	0.05324	-1657.12	0.60082	0.05538	0.61828	-1657.08
25.9336	3.53365e-07	J01542	17190896	0.61497	0.76212	-4554.92	0.68777	0.96939	-4541.96	17190896	0.61497	0.71518	-4597.14	0.72301	0.69354	-4596.96	0.78182	0.69524	-4595.43	0.78182	0.69229	0.7006	-4595.42	J01542	17190896	0.61497	0.70578	0.96071	-8899.78	0.68815	0.96401	0.71525	-8899.46
25.8938	3.60726e-07	J00703	4153174	0.35294	0.12901	-1010.14	0.19449	0	-997.194	4153174	0.35294	0.17306	-1398.95	0.15397	0.20494	-1398.41	0.09373	0.19066	-1396.7	0.09373	0.18914	0.1931	-1396.7	J00703	4153174	0.35294	0.17998	0	-2396.34	0.1946	0	0.1731	-2396.14
25.8438	3.70192e-07	N00689	3663627	0.93048	0.59758	-3064.12	0.75984	0.30332	-3051.2	3663627	0.93048	0.70498	-3354.86	0.81215	0.49438	-3349.79	0.60346	0.73005	-3353.97	0.60346	0.93672	0.45565	-3344.8	N00689	3663627	0.93048	0.72388	0.28224	-6311.36	0.76069	0.27956	0.70472	-6310.97
25.83	3.72848e-07	M01172	17272201	0.46524	0.41143	-989.616	0.27631	0.68228	-976.701	17272201	0.46524	0.5292	-1670.73	0.56726	0.44669	-1668.92	0.55431	0.52103	-1670.55	0.55464	0.57696	0.44357	-1668.86	M01172	17272201	0.46524	0.4602	0.60259	-2663.08	0.27725	0.6818	0.52919	-2647.44
25.8092	3.76888e-07	A00669.A00670	3716768	0.25134	0.3073	-1158.74	0.41647	0.10925	-1145.83	3716768	0.25134	0.27993	-1511.08	0.27446	0.29151	-1511.03	0.28864	0.27852	-1511.07	0.28835	0.26728	0.29381	-1510.99	A00669.A00670	3716768	0.25134	0.32597	0.12485	-2662.2	0.41643	0.10999	0.28009	-2656.92
25.797	3.79278e-07	C00174	4049801	0.59893	0.56847	-254.761	0.33977	1	-241.863	4049801	0.59893	0.57126	-473.997	0.57849	0.54632	-473.951	0.74722	0.52955	-471.722	0.74722	0.49155	0.59053	-471.468	C00174	4049801	0.59893	0.5201	1	-719.273	0.33943	1	0.571	-715.86
25.7376	3.91132e-07	C00541	13381393	0.5508	0.67019	-951.962	0.77055	0.34015	-939.093	13381393	0.5508	0.70634	-1533.65	0.70053	0.723	-1533.57	0.78631	0.68594	-1531.94	0.78631	0.63912	0.75207	-1530.85	C00541	13381393	0.5508	0.72668	0.35922	-2474.16	0.77048	0.3402	0.70609	-2472.74
25.722	3.94306e-07	D01150	5777864	0.19251	0.20328	-1435.35	0.29822	0.02981	-1422.49	5777864	0.19251	0.20833	-2341.14	0.25486	0.12391	-2337.94	0.24169	0.20108	-2340.82	0.24234	0.26219	0.12207	-2337.88	D01150	5777864	0.19251	0.23632	0.03696	-3766.63	0.29814	0.03005	0.20831	-3763.62
25.6952	3.9982e-07	N02652	22701140	0.37968	0.43431	-345.041	0.29918	1	-332.194	22701140	0.37968	0.38697	-596.399	0.44866	0.25824	-594.414	0.56577	0.35693	-593.752	0.56576	0.40235	0.28202	-593.087	N02652	22701140	0.37968	0.35929	0.99913	-929.875	0.2991	0.99997	0.38661	-928.593
25.6734	4.04362e-07	J01144	8979302	0.70053	0.75515	-3490.31	0.68141	0.89702	-3477.47	8979302	0.70053	0.74973	-3641.21	0.74655	0.75749	-3641.17	0.71061	0.75957	-3640.54	0.71071	0.76373	0.7535	-3640.51	J01144	8979302	0.70053	0.72755	0.89075	-7042.66	0.681	0.89614	0.74949	-7040.03
25.6616	4.06843e-07	G00088	617563	0.14973	0.15585	-2371.73	0.02834	0.53158	-2358.9	617563	0.14973	0.09633	-2921.38	0.10491	0.06332	-2921.2	0.1516	0.08048	-2920.78	0.1524	0.08524	0.07118	-2920.77	G00088	617563	0.14973	0.07648	0.51379	-5199.58	0.02863	0.52482	0.09559	-5198.28
25.6436	4.10655e-07	N01465	12165867	0.82353	0.81394	-680.512	0.93168	0.57931	-667.69	12165867	0.82353	0.89649	-1078.01	0.89464	0.90177	-1077.99	0.89828	0.89614	-1078	0.89818	0.89056	0.90379	-1077.98	N01465	12165867	0.82353	0.9061	0.59131	-1746.31	0.93178	0.57912	0.89651	-1745.7
25.6056	4.18822e-07	N02591	22342725	0.29947	0.25059	-530.539	0.1499	0.58988	-517.736	22342725	0.29947	0.22908	-1520.97	0.25012	0.1749	-1520.16	0.23993	0.22589	-1520.93	0.23981	0.25599	0.1728	-1520.12	N02591	22342725	0.29947	0.20642	0.56545	-2041.02	0.14981	0.58954	0.22898	-2038.71
25.5088	4.4037e-07	H00572.H00573	3339126	0.46524	0.60835	-5658.32	0.52339	0.74079	-5645.57	3339126	0.46524	0.63347	-5917.82	0.62859	0.64368	-5917.75	0.59764	0.64307	-5917.31	0.59756	0.64395	0.64135	-5917.31	H00572.H00573	3339126	0.46524	0.59743	0.73807	-11034.2	0.52494	0.74206	0.63343	-11028.7
25.4768	4.47735e-07	J00395	1762002	0.45989	0.33564	-1755.93	0.42821	0.15463	-1743.19	1762002	0.45989	0.35896	-1946.97	0.40628	0.25306	-1943.43	0.34142	0.36498	-1946.85	0.3412	0.45341	0.23859	-1941.48	J00395	1762002	0.45989	0.38263	0.16677	-3622.93	0.42784	0.15833	0.35947	-3621.17
25.4658	4.50295e-07	M00236	4045510	0.54011	0.44349	-2455.42	0.54519	0.23583	-2442.69	4045510	0.54011	0.4865	-3205.62	0.46388	0.52735	-3204.92	0.54819	0.47247	-3204.76	0.54819	0.4247	0.53415	-3203.01	M00236	4045510	0.54011	0.50516	0.23713	-5614.37	0.54501	0.23086	0.48647	-5613.29
25.4516	4.53621e-07	G00637	4262117	0.78075	0.69272	-603.745	0.55024	0.99999	-591.02	4262117	0.78075	0.70406	-788.306	0.64802	0.8131	-786.552	0.65659	0.71421	-788.053	0.65659	0.64345	0.8153	-786.542	G00637	4262117	0.78075	0.65329	0.97549	-1383.25	0.55015	0.99999	0.70423	-1379.33
25.448	4.54469e-07	N00337	1594631	0.89305	0.8879	-609.796	1	0.42195	-597.072	1594631	0.89305	0.95223	-1504.59	0.94896	0.9601	-1504.54	0.99999	0.94773	-1503.95	1	0.93564	0.96472	-1503.74	N00337	1594631	0.89305	0.96155	0.441	-2103.59	1	0.422	0.95225	-2101.66
25.4376	4.56925e-07	M00038.M00039	228602	0.81283	0.83438	-4825.32	0.77479	0.96015	-4812.6	228602	0.81283	0.89035	-5258.5	0.86564	0.93809	-5255.88	0.91237	0.884	-5258.05	0.91233	0.83618	0.9448	-5253.69	M00038.M00039	228602	0.81283	0.85118	0.95415	-9962.7	0.7758	0.96043	0.89025	-9952.31
25.421	4.60874e-07	B01115	12814535	0.9893	0.85782	-427.86	1	0.24212	-415.15	12814535	0.9893	1	-912.786	1	1	-912.786	1	1	-912.786	1	1	1	-912.786	B01115	12814535	0.9893	1	0.24239	-1327.94	1	0.24238	1	-1327.94
25.377	4.71506e-07	L00119	843244	0.37433	0.21018	-363.231	0.0893	0.60386	-350.543	843244	0.37433	0.1741	-698.758	0.15382	0.21157	-698.419	0.11808	0.18501	-698.262	0.11808	0.17064	0.20472	-698.166	L00119	843244	0.37433	0.14833	0.57783	-1051.23	0.08934	0.60431	0.17413	-1049.3
25.374	4.7224e-07	K00539.K00540	2793772	0.2139	0.27019	-2368.59	0.17893	0.50503	-2355.9	2793772	0.2139	0.16641	-3307.53	0.18766	0.12021	-3306.81	0.25035	0.1484	-3306.09	0.25018	0.16327	0.12594	-3305.91	K00539.K00540	2793772	0.2139	0.17117	0.51002	-5594.69	0.17963	0.50939	0.16635	-5594.62
25.3662	4.74154e-07	C00686	14767961	0.85027	0.772	-1000.31	0.85998	0.48396	-987.631	14767961	0.85027	0.80579	-1790.92	0.8444	0.72447	-1788.52	0.84156	0.79364	-1790.31	0.84162	0.84929	0.72398	-1788.5	C00686	14767961	0.85027	0.82223	0.4983	-2779.94	0.85984	0.484	0.8057	-2778.55
25.3622	4.75138e-07	D00901	4370207	0.75936	0.26592	-106.557	0.05472	1	-93.8762	4370207	0.75936	0.24171	-157.842	0.18925	0.3304	-157.348	0.12869	0.25823	-157.172	0.12862	0.22426	0.30534	-157.052	D00901	4370207	0.75936	0.19277	0.93749	-255.827	0.05471	1	0.24171	-251.718
25.2872	4.93976e-07	B01686.B01687.B01688	17911390	0.63636	0.72703	-2468.06	0.62002	0.99999	-2455.41	17911390	0.63636	0.72621	-3021.53	0.67398	0.82681	-3019.67	0.78404	0.71566	-3021.18	0.784	0.62825	0.83963	-3018.22	B01686.B01687.B01688	17911390	0.63636	0.69135	1	-5478.89	0.6198	0.99999	0.72621	-5476.95
25.277	4.96595e-07	H01537.H01538	16590316	0.62567	0.40843	-1011.86	0.52771	0.0879	-999.222	16590316	0.62567	0.32821	-1321.1	0.3249	0.33685	-1321.08	0.22758	0.35061	-1319.7	0.22758	0.3752	0.31515	-1319.49	H01537.H01538	16590316	0.62567	0.39496	0.11408	-2327.57	0.52768	0.0873	0.32802	-2320.32
25.2256	5.10007e-07	F00994	4764244	0.09091	0.16936	-1388.8	0	0.613	-1376.19	4764244	0.09091	0.14965	-2358.92	0.07447	0.27732	-2357.45	0.20784	0.13844	-2358.73	0.20776	0.00027	0.30958	-2356.1	F00994	4764244	0.09091	0.09407	0.59098	-3737.98	0	0.61284	0.15015	-3735.1
25.22	5.1149e-07	M00781	15238111	0.6631	0.6154	-1048.38	0.49522	0.87149	-1035.77	15238111	0.6631	0.56587	-1548.6	0.54287	0.60752	-1548.19	0.56739	0.56524	-1548.6	0.56738	0.52999	0.61242	-1548.07	M00781	15238111	0.6631	0.54328	0.85752	-2585.53	0.49535	0.87067	0.56573	-2584.37
25.1782	5.22697e-07	N00053	237015	0.65241	0.68478	-1317.93	0.59219	0.89252	-1305.34	237015	0.65241	0.6142	-1539.5	0.56021	0.73174	-1536.11	0.47151	0.66222	-1532.6	0.47151	0.6415	0.69176	-1532.4	N00053	237015	0.65241	0.60701	0.88766	-2751.01	0.59303	0.89018	0.6142	-2750.85
25.174	5.23837e-07	L01734	25134235	0.65775	0.51175	-1540.53	0.63144	0.19368	-1527.95	25134235	0.65775	0.56099	-2126	0.5414	0.60473	-2125.66	0.43532	0.59651	-2123.19	0.43633	0.60667	0.58094	-2123.15	L01734	25134235	0.65775	0.58419	0.20679	-3655.02	0.63115	0.19423	0.56065	-3653.95
25.1722	5.24326e-07	J00240	1152604	0.90909	0.79268	-348.856	0.87682	0.30906	-336.27	1152604	0.90909	0.87908	-658.231	0.87593	0.88956	-658.205	0.87619	0.87953	-658.23	0.87593	0.87331	0.89087	-658.202	J00240	1152604	0.90909	0.8783	0.30866	-994.503	0.87699	0.30866	0.87905	-994.502
25.1692	5.25142e-07	J00721	4273254	0.90374	0.77589	-1287.27	0.86487	0.50212	-1274.68	4273254	0.90374	0.82842	-1900.59	0.84861	0.7888	-1900	0.79753	0.83498	-1900.32	0.79725	0.87754	0.77647	-1898.98	J00721	4273254	0.90374	0.84012	0.51049	-3175.87	0.86457	0.50212	0.82829	-3175.27
25.169	5.25197e-07	N01743	14929556	0.96257	0.804	-2332.75	0.89175	0.5754	-2320.16	14929556	0.96257	0.89579	-3192.02	0.91738	0.83651	-3190.56	0.90744	0.89193	-3191.93	0.90744	0.92396	0.83407	-3190.47	N01743	14929556	0.96257	0.89416	0.57929	-5433.01	0.89054	0.57929	0.89581	-5432.99
25.1152	5.40055e-07	N00939	6357866	0.12299	0.17546	-2282.13	0.23795	0.05744	-2269.57	6357866	0.12299	0.18141	-3163.94	0.18501	0.17381	-3163.88	0.16905	0.18493	-3163.84	0.16904	0.19523	0.17228	-3163.67	N00939	6357866	0.12299	0.19973	0.05966	-5404.44	0.23779	0.05666	0.18128	-5402.33
25.0876	5.4784e-07	F01528	14576424	0.31551	0.38746	-740.297	0.243	0.89927	-727.753	14576424	0.31551	0.36046	-1720.44	0.3336	0.43131	-1719.83	0.40816	0.34397	-1720.01	0.4082	0.27728	0.45487	-1718.38	F01528	14576424	0.31551	0.3271	0.85778	-2450.51	0.24312	0.89893	0.36045	-2448.2
25.0658	5.54069e-07	N02028	17591103	0.39572	0.54325	-2559.41	0.44523	0.75053	-2546.88	17591103	0.39572	0.514	-3407.03	0.5208	0.49532	-3406.91	0.4764	0.52369	-3406.65	0.4764	0.5484	0.48782	-3406.18	N02028	17591103	0.39572	0.49134	0.73972	-5909.75	0.44495	0.74777	0.51366	-5908.2
25.0488	5.58975e-07	D00149.D00150	666673	0.81818	0.69799	-3698.47	0.60721	0.96625	-3685.95	666673	0.81818	0.71376	-3845.54	0.71675	0.70447	-3845.52	0.79219	0.69359	-3844.08	0.79218	0.67833	0.71674	-3843.94	D00149.D00150	666673	0.81818	0.67773	0.95124	-7362.76	0.60639	0.96096	0.71372	-7359.6
25.0486	5.59033e-07	G00106	713924	0.22995	0.50169	-236.256	0.21057	1	-223.732	713924	0.22995	0.43679	-579.894	0.40944	0.49067	-579.75	0.52213	0.41874	-579.582	0.52212	0.34695	0.52211	-579.064	G00106	713924	0.22995	0.37215	1	-806.379	0.21062	1	0.43679	-803.626
25.0208	5.67152e-07	M00069.M00070	369725	0.6631	0.56231	-3729.93	0.65232	0.36331	-3717.42	369725	0.6631	0.64946	-4931.51	0.66751	0.61126	-4930.92	0.65304	0.64829	-4931.5	0.65302	0.67577	0.60927	-4930.83	M00069.M00070	369725	0.6631	0.64897	0.3557	-8553.27	0.64803	0.3557	0.64897	-8553.27
25.0172	5.68212e-07	M01212	17461079	0.65775	0.56028	-3600.29	0.6683	0.32013	-3587.78	17461079	0.65775	0.65909	-4961.09	0.69256	0.58339	-4959.58	0.67819	0.65291	-4960.98	0.67819	0.70152	0.58085	-4959.51	M01212	17461079	0.65775	0.66201	0.31259	-8307.26	0.66791	0.31175	0.65905	-8307.24
25.0008	5.73065e-07	H02363	23752481	0.95722	0.94048	-1876.46	0.98172	0.67684	-1863.96	23752481	0.95722	0.92611	-2426.41	0.91219	0.94514	-2426.13	0.74685	0.94833	-2420.46	0.74678	0.95881	0.93443	-2420.28	H02363	23752481	0.95722	0.95001	0.68452	-4293.21	0.98184	0.67683	0.92572	-4290.38
24.99	5.76284e-07	H01899	18570252	0.55615	0.35313	-382.378	0.21815	0.65934	-369.884	18570252	0.55615	0.27731	-677.222	0.21358	0.39232	-673.758	0.22618	0.2889	-676.633	0.22618	0.20504	0.39632	-673.7	H01899	18570252	0.55615	0.26161	0.63971	-1048.05	0.2181	0.65932	0.27738	-1047.11
24.9734	5.81267e-07	D00181.D00182	808915	0.63636	0.90008	-1593.4	0.97788	0.66941	-1580.92	808915	0.63636	0.94246	-2456.67	0.93725	0.95787	-2456.48	1	0.93214	-2454.36	0.99999	0.90645	0.96997	-2453.35	D00181.D00182	808915	0.63636	0.9524	0.68638	-3964.47	0.9777	0.67439	0.94245	-3963.27
24.9532	5.8739e-07	G00994	9846433	0.57219	0.77987	-1071.69	0.66986	1	-1059.22	9846433	0.57219	0.75139	-1916.19	0.69628	0.88629	-1913.33	0.87375	0.70699	-1912.01	0.87319	0.55298	0.93899	-1902.5	G00994	9846433	0.57219	0.72461	0.99999	-2976.94	0.66976	1	0.75151	-2975.41
24.9326	5.93699e-07	M00457	6934279	0.76471	0.77946	-4728.08	0.69775	0.91583	-4715.62	6934279	0.76471	0.74345	-5025.46	0.74017	0.75074	-5025.43	0.65197	0.76844	-5022.52	0.6523	0.78619	0.74485	-5022.15	M00457	6934279	0.76471	0.7284	0.91004	-9422.51	0.69938	0.91095	0.74364	-9421.64
24.882	6.09489e-07	D02338	19582519	0.13904	0.5227	-654.944	0.68021	0.0685	-642.503	19582519	0.13904	0.61961	-1017.99	0.61944	0.61911	-1017.99	0.62817	0.61698	-1017.98	0.62818	0.61455	0.62146	-1017.98	D02338	19582519	0.13904	0.63774	0.08521	-1661.05	0.68	0.06873	0.61931	-1660.5
24.8594	6.16676e-07	I00418	8646660	0.59893	0.4499	-1508.44	0.54535	0.1921	-1496.01	8646660	0.59893	0.49887	-2200.92	0.49045	0.52207	-2200.77	0.35516	0.53171	-2196.91	0.35516	0.55185	0.50126	-2196.66	I00418	8646660	0.59893	0.51454	0.19795	-3697.56	0.54542	0.19193	0.49877	-3696.93
24.8504	6.19562e-07	E00145	791784	0.45989	0.43621	-1396.68	0.56489	0.19153	-1384.26	791784	0.45989	0.40476	-2006.54	0.42559	0.37116	-2006.26	0.28429	0.43273	-2004.49	0.28504	0.50372	0.35359	-2002.84	E00145	791784	0.45989	0.45797	0.20409	-3395.4	0.56515	0.1915	0.40469	-3390.79
24.8018	6.35381e-07	L01429	23644653	0.50267	0.69939	-564.084	0.62054	0.99508	-551.683	23644653	0.50267	0.69749	-822.265	0.69359	0.71016	-822.232	0.69469	0.69814	-822.263	0.6946	0.68953	0.71187	-822.227	L01429	23644653	0.50267	0.67029	0.99151	-1375.41	0.62059	0.99499	0.69763	-1373.95
24.7466	6.5384e-07	L01714	25020664	0.28877	0.33486	-958.933	0.44181	0.09492	-946.56	25020664	0.28877	0.3632	-1584.88	0.42027	0.24403	-1581.25	0.45881	0.33889	-1582.87	0.45852	0.39861	0.25177	-1580.86	L01714	25020664	0.28877	0.38701	0.10447	-2533.02	0.4419	0.09465	0.36353	-2531.44
24.7442	6.54655e-07	I00396	8149764	0.40642	0.25117	-3469.4	0.33064	0.11893	-3457.03	8149764	0.40642	0.34071	-4191.26	0.35706	0.30847	-4190.74	0.3865	0.3277	-4190.49	0.38603	0.34028	0.31153	-4190.35	I00396	8149764	0.40642	0.33754	0.12116	-7490.28	0.33089	0.12177	0.34069	-7490.24
24.7286	6.59975e-07	C01198	18012371	0.4492	0.12749	-859.483	0.03151	0.32349	-847.119	18012371	0.4492	0.13325	-1293.4	0.13854	0.11797	-1293.3	0.13325	0.1329	-1293.4	0.13347	0.14467	0.11538	-1293.27	C01198	18012371	0.4492	0.1033	0.29503	-2146.02	0.03158	0.32333	0.13288	-2140.52
24.6648	6.82188e-07	F00482	2241445	0.72193	0.63195	-1991.03	0.74746	0.33211	-1978.7	2241445	0.72193	0.60646	-2556.25	0.65295	0.52212	-2554.8	0.58188	0.61153	-2556.17	0.58095	0.68872	0.51059	-2554	F00482	2241445	0.72193	0.65502	0.3538	-4539.17	0.74774	0.33223	0.60632	-4534.95
24.6478	6.88233e-07	L00452	6025395	0.93583	0.40111	-569.747	0.5868	0	-557.423	6025395	0.93583	0.58483	-1060.74	0.56215	0.63207	-1060.59	0.34578	0.65191	-1056.79	0.34589	0.70275	0.57933	-1056.44	L00452	6025395	0.93583	0.58572	0	-1618.16	0.58718	0	0.58466	-1618.16
24.5938	7.07791e-07	I00172	1877358	0.86096	0.76022	-1033.65	0.67108	0.97227	-1021.35	1877358	0.86096	0.74092	-1675.71	0.7406	0.74278	-1675.71	0.78558	0.73089	-1675.18	0.78559	0.71501	0.75373	-1675.02	I00172	1877358	0.86096	0.71891	0.96242	-2698.73	0.67085	0.97231	0.74116	-2697.06
24.5696	7.16736e-07	L01054	20980088	0.72727	0.7522	-656.592	0.90994	0.31783	-644.307	20980088	0.72727	0.79476	-1149.95	0.79476	0.7959	-1149.95	0.7292	0.80834	-1149.47	0.7292	0.82528	0.78223	-1149.36	L01054	20980088	0.72727	0.82673	0.36153	-1796.62	0.90976	0.31787	0.79476	-1794.26
24.5454	7.25794e-07	L01822	25517053	0.88235	0.7708	-734.097	0.9294	0.42115	-721.825	25517053	0.88235	0.87651	-1519.14	0.85551	0.92555	-1518.5	0.79128	0.8951	-1517.55	0.7916	0.88486	0.91206	-1517.47	L01822	25517053	0.88235	0.88623	0.44097	-2241.56	0.92941	0.42141	0.87642	-2240.97
24.5362	7.29268e-07	A00392	2023028	0.8984	0.80215	-1807.03	0.88998	0.49413	-1794.76	2023028	0.8984	0.89339	-2502.19	0.89544	0.88658	-2502.18	0.82782	0.91491	-2500.41	0.82782	0.93994	0.86872	-2499.62	A00392	2023028	0.8984	0.89445	0.47401	-4189.12	0.89663	0.47367	0.8936	-4189.12
24.494	7.45416e-07	M00822	15466845	0.31551	0.78387	-281.779	0.71063	1	-269.532	15466845	0.31551	0.71376	-643.393	0.72873	0.68466	-643.206	0.84258	0.68015	-639.916	0.84247	0.65443	0.71422	-639.66	M00822	15466845	0.31551	0.71263	1	-912.928	0.71071	1	0.71365	-912.926
24.481	7.50463e-07	G00788	6515384	0.65241	0.74076	-606.624	0.86528	0.37041	-594.384	6515384	0.65241	0.78241	-956.796	0.77505	0.80355	-956.7	0.84505	0.77118	-956.273	0.84505	0.73624	0.8223	-955.796	G00788	6515384	0.65241	0.8092	0.40442	-1552.96	0.86529	0.37044	0.78261	-1551.18
24.4678	7.55622e-07	A00634	3455876	0.46524	0.67819	-2645.29	0.53912	0.92122	-2633.05	3455876	0.46524	0.6013	-3511.18	0.4907	0.82717	-3500.22	0.49832	0.6332	-3509.14	0.49837	0.48414	0.82832	-3500.21	A00634	3455876	0.46524	0.58342	0.91105	-6020.13	0.54121	0.91951	0.60132	-6019.46
24.4506	7.62398e-07	N02585	22295237	0.29412	0.30377	-1536.71	0.16955	0.6223	-1524.49	22295237	0.29412	0.34292	-2027.25	0.31023	0.39797	-2026.74	0.23294	0.36647	-2025.93	0.23323	0.35453	0.38097	-2025.9	N02585	22295237	0.29412	0.28719	0.59658	-3556.81	0.16951	0.62177	0.34292	-3551.73
24.4	7.82687e-07	D02099	17967211	0.79144	0.47967	-177.453	0.28605	1	-165.253	17967211	0.79144	0.59223	-571.922	0.62348	0.52231	-571.521	0.61133	0.58978	-571.907	0.61095	0.6273	0.52114	-571.512	D02099	17967211	0.79144	0.52082	1	-743.782	0.28623	1	0.59224	-737.175
24.3796	7.91019e-07	L00022	194901	0.62567	0.68221	-1876.04	0.5956	0.84653	-1863.85	194901	0.62567	0.68542	-2862.33	0.64599	0.76371	-2859.61	0.67936	0.6874	-2862.32	0.67938	0.62062	0.77003	-2859.01	L00022	194901	0.62567	0.65625	0.84096	-4695.91	0.59585	0.84859	0.68542	-4692.73
24.3762	7.92416e-07	N02626	22537701	0.67914	0.59058	-928.007	0.68146	0.21278	-915.819	22537701	0.67914	0.60311	-1781.18	0.6026	0.60433	-1781.18	0.60441	0.60267	-1781.18	0.60449	0.60149	0.60492	-1781.18	N02626	22537701	0.67914	0.62785	0.23371	-2698.8	0.68119	0.21333	0.60296	-2697
24.3056	8.21997e-07	E01406	17155704	0.60963	0.61423	-619.913	0.46253	1	-607.76	17155704	0.60963	0.4768	-1144.05	0.51372	0.39913	-1143.27	0.71367	0.43835	-1139.86	0.71368	0.44725	0.42431	-1139.84	E01406	17155704	0.60963	0.47315	0.99999	-1751.84	0.46266	0.99999	0.47687	-1751.81
24.2806	8.32736e-07	N02943	24209168	0.25668	0.32494	-1169.91	0.44681	0.06996	-1157.77	24209168	0.25668	0.38063	-1633.82	0.41093	0.31638	-1632.91	0.41564	0.37039	-1633.51	0.41573	0.40932	0.31719	-1632.91	N02943	24209168	0.25668	0.40021	0.08674	-2759.66	0.44632	0.07039	0.38089	-2758.6
24.2624	8.40641e-07	B00827	4907736	0.68449	0.8401	-1220.16	0.76115	0.96522	-1208.02	4907736	0.68449	0.81021	-1720.75	0.77662	0.87671	-1717.99	0.79595	0.8141	-1720.65	0.79631	0.76443	0.87969	-1717.76	B00827	4907736	0.68449	0.79531	0.95841	-2930	0.76122	0.96504	0.81022	-2928.77
24.2446	8.48446e-07	D01677	14046888	0.59893	0.57285	-963.088	0.48377	0.81378	-950.965	14046888	0.59893	0.58303	-1479.13	0.60861	0.52616	-1478.33	0.67849	0.5571	-1476.78	0.6785	0.56647	0.54367	-1476.73	D01677	14046888	0.59893	0.5486	0.80061	-2433.17	0.4835	0.81323	0.58265	-2430.09
24.2402	8.50387e-07	I01045	14351966	0.8984	0.87938	-1473.86	0.95669	0.7207	-1461.74	14351966	0.8984	0.9293	-1874.44	0.92946	0.92916	-1874.44	0.86513	0.94074	-1872.84	0.86512	0.96205	0.90981	-1872.24	I01045	14351966	0.8984	0.93845	0.72786	-3336.87	0.95672	0.72076	0.92931	-3336.18
24.2024	8.67241e-07	B01745	18172189	0.32086	0.49486	-1042.94	0.39892	0.74918	-1030.84	18172189	0.32086	0.41216	-1932.77	0.41499	0.40504	-1932.75	0.44724	0.4042	-1932.53	0.44715	0.40052	0.40958	-1932.52	B01745	18172189	0.32086	0.40772	0.7466	-2963.66	0.39926	0.74875	0.41236	-2963.61
24.1612	8.85994e-07	C00761.C00762	15325245	0.68984	0.68107	-5550.09	0.7625	0.52525	-5538.01	15325245	0.68984	0.71825	-5631.96	0.72201	0.70981	-5631.92	0.71204	0.72052	-5631.95	0.71211	0.72905	0.70876	-5631.86	C00761.C00762	15325245	0.68984	0.73374	0.52099	-10853.6	0.76218	0.51774	0.71901	-10852.6
24.145	8.93478e-07	G00376	2337372	0.37968	0.4821	-2801.71	0.37916	0.82409	-2789.64	2337372	0.37968	0.47843	-3754.9	0.47467	0.49098	-3754.87	0.5981	0.44568	-3752.66	0.5981	0.40501	0.50995	-3751.9	G00376	2337372	0.37968	0.44439	0.80642	-6434.51	0.38146	0.81795	0.47853	-6432.63
24.1244	9.03087e-07	C00719	14984432	0.90374	0.60197	-611.134	0.82651	0.05406	-599.072	14984432	0.90374	0.77306	-934.14	0.80296	0.69603	-933.722	0.87758	0.74129	-933.03	0.87717	0.75459	0.72017	-933	C00719	14984432	0.90374	0.78621	0.07035	-1533.46	0.82639	0.05497	0.77255	-1533.21
24.094	9.17457e-07	J01086	7460797	0.71658	0.6088	-1125.05	0.53395	0.87915	-1113	7460797	0.71658	0.59248	-2019.63	0.59287	0.58966	-2019.63	0.55718	0.60359	-2019.2	0.55718	0.62074	0.57882	-2019.01	J01086	7460797	0.71658	0.5729	0.87133	-3133.83	0.53391	0.87848	0.59222	-3132.64
24.0662	9.30799e-07	B01564	17192698	0.57754	0.4797	-1330.11	0.59773	0.25595	-1318.08	17192698	0.57754	0.45124	-1649.59	0.41427	0.52081	-1648.19	0.35471	0.4796	-1647.08	0.35467	0.45853	0.50448	-1646.9	B01564	17192698	0.57754	0.49496	0.28641	-2973.51	0.59751	0.25632	0.45133	-2967.67
24.0366	9.45218e-07	G01277	16683915	0.33155	0.18585	-1313.82	0.30781	0.0191	-1301.8	16683915	0.33155	0.40083	-2068.83	0.43276	0.33434	-2068.27	0.27262	0.43436	-2066.65	0.27262	0.53566	0.2923	-2064.04	G01277	16683915	0.33155	0.37329	0.0166	-3371.92	0.30867	0.01884	0.40077	-3370.63
24.0276	9.49646e-07	F00135	623186	0.79144	0.55016	-1387.25	0.67905	0.24989	-1375.24	623186	0.79144	0.70202	-2459.74	0.74647	0.61112	-2457.75	0.69221	0.70362	-2459.72	0.6922	0.76997	0.60211	-2457.15	F00135	623186	0.79144	0.69639	0.23698	-3787.61	0.6832	0.24109	0.70185	-3787.52
23.9966	9.6506e-07	F02036	18899113	0.34759	0.27082	-3567.21	0.36098	0.13053	-3555.22	18899113	0.34759	0.30958	-4308.15	0.31811	0.28753	-4307.92	0.36921	0.29213	-4306.73	0.36909	0.2884	0.29619	-4306.72	F02036	18899113	0.34759	0.32492	0.13772	-7718.39	0.35894	0.13203	0.30952	-7717.36
23.913	1.00789e-06	L02011	26455399	0.70053	0.60637	-3040.85	0.69492	0.42996	-3028.89	26455399	0.70053	0.67831	-4034.19	0.68781	0.65474	-4033.94	0.73416	0.66026	-4032.86	0.73416	0.65871	0.66302	-4032.86	L02011	26455399	0.70053	0.68411	0.43016	-6971.71	0.69619	0.42875	0.67828	-6971.58
23.911	1.00894e-06	F00087	438021	0.68449	0.75171	-863.591	0.84156	0.3834	-851.635	438021	0.68449	0.76332	-931.748	0.76397	0.76128	-931.747	0.65718	0.78108	-930.387	0.65698	0.81869	0.73079	-929.874	F00087	438021	0.68449	0.79213	0.40408	-1785.37	0.84143	0.38379	0.76338	-1783.38
23.9024	1.01345e-06	N01789	15179835	0.6738	0.77565	-665.162	0.88507	0.46069	-653.21	15179835	0.6738	0.80475	-1474.72	0.80489	0.80341	-1474.72	0.83759	0.79366	-1474.3	0.83774	0.78202	0.81315	-1474.2	N01789	15179835	0.6738	0.82641	0.48982	-2130.19	0.88497	0.46073	0.80454	-2127.93
23.9	1.01472e-06	K00162	713955	0.62032	0.78095	-519.046	0.87366	0.34482	-507.096	713955	0.62032	0.83231	-768.966	0.83633	0.81881	-768.924	0.84546	0.8293	-768.928	0.84537	0.83629	0.81881	-768.909	K00162	713955	0.62032	0.84676	0.35895	-1276.66	0.87371	0.34512	0.83197	-1276.06
23.8754	1.02777e-06	J00576	3225830	0.66845	0.46482	-503.346	0.57246	0.13729	-491.408	3225830	0.66845	0.66518	-840.789	0.71183	0.56206	-838.517	0.70938	0.65182	-840.305	0.70923	0.7134	0.56144	-838.516	J00576	3225830	0.66845	0.63708	0.12065	-1334.22	0.57246	0.1376	0.66521	-1332.2
23.8534	1.03958e-06	K01401	23797975	0.91979	0.87894	-267.258	0.96278	0.55733	-255.331	23797975	0.91979	0.9517	-384.945	0.92233	1	-383.066	0.87766	0.96312	-383.301	0.8777	0.9392	0.99428	-382.505	K01401	23797975	0.91979	0.9552	0.561	-640.388	0.96273	0.55735	0.9517	-640.277
23.7988	1.06949e-06	B01257	14758895	0.74332	0.57473	-318.882	0.81332	0	-306.983	14758895	0.74332	0.33979	-567.365	0.39208	0.23459	-566.518	0.32494	0.34271	-567.351	0.32511	0.42154	0.22028	-566.198	B01257	14758895	0.74332	0.4515	0.17701	-890.504	0.81332	0	0.33969	-874.347
23.7862	1.07652e-06	A00307	1555829	0.59358	0.53907	-2285.59	0.62695	0.35332	-2273.7	1555829	0.59358	0.61788	-3106.57	0.61047	0.63852	-3106.4	0.5876	0.62603	-3106.27	0.58761	0.61901	0.63597	-3106.23	A00307	1555829	0.59358	0.62209	0.35061	-5304.97	0.63049	0.34942	0.61786	-5304.91
23.7748	1.08291e-06	E00224	1154003	0.5615	0.55795	-1072.33	0.42637	0.85614	-1060.45	1154003	0.5615	0.55464	-1970.34	0.52724	0.60979	-1969.68	0.64301	0.53428	-1969.15	0.64275	0.46915	0.62728	-1967.15	E00224	1154003	0.5615	0.51629	0.82685	-3034.16	0.42638	0.85647	0.55465	-3030.79
23.7532	1.09513e-06	K00632	3403105	0.77005	0.6467	-1140.9	0.80701	0.3258	-1129.03	3403105	0.77005	0.59571	-1541.01	0.60597	0.5705	-1540.91	0.40799	0.63789	-1537.08	0.4081	0.73489	0.51395	-1534.83	K00632	3403105	0.77005	0.65856	0.3727	-2676.53	0.80667	0.32611	0.59586	-2670.04
23.7428	1.10107e-06	F00551	2574850	0.59893	0.70653	-1664.3	0.60964	0.88672	-1652.43	2574850	0.59893	0.62896	-2493.35	0.62264	0.64742	-2493.24	0.64001	0.62602	-2493.31	0.6399	0.60862	0.6524	-2493.09	F00551	2574850	0.59893	0.62307	0.88406	-4145.9	0.60995	0.8867	0.62905	-4145.78
23.6916	1.13075e-06	H01564.H01565	16731569	0.44385	0.34834	-1330.66	0.48154	0.00935	-1318.82	16731569	0.44385	0.42141	-1921.06	0.41726	0.43227	-1921.04	0.42141	0.42134	-1921.06	0.42181	0.41339	0.43346	-1921.04	H01564.H01565	16731569	0.44385	0.44169	0.01944	-3240.44	0.4815	0.00956	0.4214	-3239.88
23.6904	1.13146e-06	M00143	948408	0.54545	0.25609	-1836.69	0.34292	0.08404	-1824.84	948408	0.54545	0.36138	-2948.78	0.3176	0.45912	-2945.89	0.23318	0.39972	-2942.95	0.23304	0.37395	0.43677	-2942.55	M00143	948408	0.54545	0.35505	0.08174	-4773.75	0.34322	0.08429	0.36142	-4773.63
23.6754	1.14031e-06	H00469.H00470	2858066	0.48663	0.34072	-1973.29	0.2309	0.60423	-1961.45	2858066	0.48663	0.3846	-2282.47	0.38018	0.39612	-2282.44	0.47116	0.3615	-2281.17	0.47032	0.31465	0.42394	-2280.41	H00469.H00470	2858066	0.48663	0.32944	0.57082	-4193.12	0.22981	0.60173	0.38445	-4187.06
23.6744	1.1409e-06	L02028	26511014	0.73262	0.8285	-764.3	0.74966	1	-752.462	26511014	0.73262	0.68685	-1090.23	0.67192	0.71934	-1090.09	0.91504	0.63458	-1081.45	0.91494	0.5387	0.7853	-1078.43	L02028	26511014	0.73262	0.70838	1	-1843.57	0.74959	1	0.68632	-1842.69
23.6698	1.14363e-06	A00620	3334465	0.85561	0.81678	-1154.41	0.74099	1	-1142.58	3334465	0.85561	0.83033	-1546.04	0.80269	0.8878	-1544.71	0.82815	0.83086	-1546.04	0.82795	0.79045	0.89124	-1544.5	A00620	3334465	0.85561	0.79974	1	-2691.76	0.74057	0.99999	0.83041	-2688.62
23.6676	1.14494e-06	D02341	19618015	0.3369	0.6299	-1752.61	0.51172	0.94971	-1740.77	19618015	0.3369	0.51659	-2696.37	0.53775	0.47062	-2695.98	0.67171	0.48126	-2692.96	0.67111	0.47486	0.49263	-2692.94	D02341	19618015	0.3369	0.51503	0.94908	-4437.15	0.51141	0.94908	0.51631	-4437.14
23.6662	1.14577e-06	B00719	3910593	0.3369	0.50817	-1297.52	0.41176	0.7462	-1285.69	3910593	0.3369	0.35999	-2114.51	0.39065	0.29879	-2113.36	0.3346	0.36616	-2114.35	0.33427	0.42233	0.28809	-2112.38	B00719	3910593	0.3369	0.37652	0.75385	-3401.04	0.4116	0.74594	0.3601	-3400.19
23.6462	1.15774e-06	F01419	11561773	0.60428	0.59872	-593.912	0.42639	0.99995	-582.088	11561773	0.60428	0.4489	-1170.25	0.45337	0.43554	-1170.23	0.36889	0.47416	-1169.42	0.36889	0.52729	0.40173	-1168.87	F01419	11561773	0.60428	0.44222	0.9984	-1752.4	0.42666	0.99973	0.44888	-1752.34
23.6382	1.16257e-06	N02011	17370141	0.22995	0.40085	-583.938	0.57654	0.06268	-572.119	17370141	0.22995	0.48476	-1013.61	0.49061	0.46672	-1013.56	0.48476	0.48476	-1013.61	0.48511	0.49873	0.46298	-1013.54	N02011	17370141	0.22995	0.5075	0.08722	-1586.97	0.57624	0.06245	0.48495	-1585.73
23.6302	1.16741e-06	J00662	3800078	0.90374	0.76839	-553.223	0.84928	0.36511	-541.408	3800078	0.90374	0.84516	-1291.55	0.84597	0.84286	-1291.55	0.84082	0.84516	-1291.55	0.84067	0.84831	0.84232	-1291.54	J00662	3800078	0.90374	0.84651	0.3662	-1832.97	0.84928	0.36506	0.84519	-1832.96
23.6168	1.17557e-06	E01517	17881827	0.67914	0.64367	-430.296	0.54605	1	-418.488	17881827	0.67914	0.67311	-1109.5	0.63972	0.73823	-1108.62	0.61049	0.68322	-1109.06	0.61045	0.64861	0.7346	-1108.51	E01517	17881827	0.67914	0.63447	1	-1531.19	0.54598	1	0.67313	-1527.99
23.5996	1.18612e-06	D00306	1382048	0.51337	0.6618	-3853.44	0.57805	0.83956	-3841.64	1382048	0.51337	0.60642	-5395.56	0.57629	0.6781	-5393.84	0.62192	0.60111	-5395.46	0.62183	0.54439	0.68729	-5392.79	D00306	1382048	0.51337	0.59791	0.83322	-9070.16	0.5802	0.83593	0.60652	-9069.9
23.5656	1.20727e-06	N00781	4534460	0.54545	0.32738	-623.625	0.22852	0.72345	-611.842	4534460	0.54545	0.33699	-983.272	0.38707	0.23789	-981.526	0.43651	0.31601	-981.891	0.43651	0.36091	0.24995	-981.111	N00781	4534460	0.54545	0.30016	0.69429	-1598.08	0.22854	0.72332	0.33706	-1595.11
23.5642	1.20815e-06	L01813	25485137	0.24599	0.20637	-737.617	0.09964	0.44907	-725.835	25485137	0.24599	0.24665	-1648.29	0.25338	0.22494	-1648.14	0.27361	0.24021	-1648.1	0.27348	0.24897	0.2267	-1648.05	L01813	25485137	0.24599	0.20817	0.40883	-2381.79	0.09943	0.44937	0.24664	-2374.12
23.5534	1.21495e-06	N01904	16054780	0.85561	0.94423	-2023.41	0.8926	1	-2011.63	16054780	0.85561	0.8217	-2808.95	0.75721	0.92709	-2799.49	0.92373	0.79561	-2803.29	0.92373	0.6608	0.9396	-2784.45	N01904	16054780	0.85561	0.84272	1	-4823.79	0.89273	1	0.82145	-4820.59
23.5288	1.23058e-06	C01101	17415737	0.63102	0.51891	-2338.17	0.61866	0.31143	-2326.41	17415737	0.63102	0.51234	-3109.16	0.53428	0.47147	-3108.62	0.47832	0.52012	-3108.91	0.47833	0.56441	0.46251	-3107.77	C01101	17415737	0.63102	0.54783	0.31815	-5407.89	0.6195	0.30396	0.51223	-5404.32
23.522	1.23494e-06	F00328	1544655	0.20856	0.21972	-1142.26	0.3063	0	-1130.5	1544655	0.20856	0.27389	-1691.08	0.24221	0.34694	-1690.22	0.20545	0.293	-1690.1	0.20483	0.26613	0.33433	-1689.84	F00328	1544655	0.20856	0.28653	0	-2821.85	0.30554	0	0.27434	-2821.58
23.4836	1.25983e-06	K00140	626101	0.29947	0.18538	-644.746	0.08294	0.46656	-633.004	626101	0.29947	0.17717	-1150.26	0.15876	0.21677	-1149.82	0.17693	0.17755	-1150.26	0.17607	0.14754	0.2224	-1149.7	K00140	626101	0.29947	0.15	0.42705	-1787.12	0.08192	0.46456	0.17723	-1783.27
23.4544	1.2791e-06	N01638	14266263	0.41711	0.25917	-436.056	0.0494	0.7554	-424.329	14266263	0.41711	0.23663	-744.643	0.19973	0.32447	-743.871	0.15666	0.25998	-743.909	0.15651	0.22508	0.31463	-743.606	N01638	14266263	0.41711	0.19312	0.68137	-1172.68	0.04934	0.75532	0.23679	-1168.97
23.4496	1.28229e-06	N01544	13627294	0.36898	0.41332	-706.327	0.54462	0.09968	-694.602	13627294	0.36898	0.43452	-1567.6	0.46957	0.35276	-1566.12	0.54678	0.40159	-1564.7	0.54678	0.42326	0.36783	-1564.43	N01544	13627294	0.36898	0.46386	0.13119	-2264.73	0.54455	0.1003	0.43481	-2262.2
23.401	1.3151e-06	B01633	17620191	0.64171	0.64919	-2312.98	0.55742	0.82916	-2301.28	17620191	0.64171	0.6362	-3285.51	0.6104	0.6873	-3284.34	0.66153	0.62945	-3285.31	0.66123	0.58361	0.69298	-3283.37	B01633	17620191	0.64171	0.61104	0.82668	-5548.44	0.55626	0.83754	0.63598	-5546.1
23.3384	1.3586e-06	E00565	3263665	0.91979	0.82429	-1689.36	0.74576	0.9565	-1677.7	3263665	0.91979	0.78915	-2666.35	0.75044	0.85872	-2663.76	0.74426	0.8012	-2665.57	0.74411	0.75322	0.85809	-2663.75	E00565	3263665	0.91979	0.77562	0.95281	-4301.35	0.74522	0.95672	0.78923	-4300.5
23.2992	1.38658e-06	K00975	13990619	0.40107	0.64801	-947.144	0.56478	0.88367	-935.495	13990619	0.40107	0.591	-1904.82	0.57178	0.62964	-1904.27	0.61011	0.58568	-1904.72	0.6101	0.55013	0.63457	-1903.77	K00975	13990619	0.40107	0.58254	0.8803	-2840.54	0.56487	0.88294	0.59101	-2840.32
23.289	1.39395e-06	F01183	5931657	0.36364	0.28722	-191.235	0.0486	0.99996	-179.59	5931657	0.36364	0.19663	-583.545	0.23156	0.12098	-583.249	0.36542	0.17249	-582.214	0.36542	0.17343	0.16851	-582.213	F01183	5931657	0.36364	0.15858	0.90485	-765.329	0.04862	0.9999	0.19662	-763.136
23.2638	1.41233e-06	D01231	6485789	0.16578	0.09379	-629.291	0.02432	0.57526	-617.659	6485789	0.16578	0.03211	-1260.95	0	0.0886	-1259.49	0.01809	0.03269	-1260.93	0.01764	0	0.0886	-1259.46	D01231	6485789	0.16578	0.02909	0.57182	-1878.66	0.02419	0.57538	0.03188	-1878.61
23.261	1.41439e-06	J01728	18392654	0.87166	0.90061	-900.364	0.98256	0.40996	-888.733	18392654	0.87166	0.86776	-1535.54	0.87212	0.84769	-1535.47	0.98375	0.82953	-1530.33	0.98397	0.79714	0.88722	-1529.78	J01728	18392654	0.87166	0.89633	0.44194	-2428.72	0.98218	0.41025	0.86763	-2424.27
23.2506	1.42206e-06	H02408	24016002	0.48128	0.56865	-2302.2	0.44939	0.82715	-2290.58	24016002	0.48128	0.54235	-3222.51	0.53808	0.55567	-3222.47	0.46724	0.56341	-3221.45	0.46672	0.57715	0.54302	-3221.36	H02408	24016002	0.48128	0.51336	0.81513	-5514.93	0.44942	0.82699	0.54264	-5513.08
23.2154	1.44833e-06	G00548	3659762	0.8984	0.92711	-1402.79	0.9777	0.75842	-1391.18	3659762	0.8984	0.95882	-2184.87	0.96779	0.93969	-2184.3	0.95872	0.95882	-2184.87	0.95845	0.97371	0.93753	-2184.08	G00548	3659762	0.8984	0.96441	0.76313	-3576.78	0.97773	0.75804	0.95869	-3576.05
23.1874	1.46957e-06	F00165.F00166	747358	0.75936	0.48295	-1049.01	0.37848	0.80343	-1037.42	747358	0.75936	0.62045	-1762.17	0.63648	0.58526	-1761.9	0.62477	0.61935	-1762.17	0.62471	0.64232	0.5832	-1761.87	F00165.F00166	747358	0.75936	0.54354	0.75376	-2813.25	0.37863	0.80335	0.6204	-2799.59
23.1776	1.47708e-06	J00301	1380788	0.62567	0.4702	-963.458	0.5841	0.21883	-951.869	1380788	0.62567	0.44593	-1248.95	0.4721	0.39744	-1248.45	0.46555	0.44243	-1248.9	0.46573	0.47524	0.39653	-1248.44	J00301	1380788	0.62567	0.49137	0.2437	-2205.42	0.58394	0.21937	0.44598	-2200.82
23.1662	1.48586e-06	H01347	15651498	0.56684	0.41405	-660.539	0.51604	0.11912	-648.956	15651498	0.56684	0.61299	-1054.5	0.64248	0.55976	-1053.81	0.5779	0.61879	-1054.36	0.57788	0.66621	0.55147	-1053.22	H01347	15651498	0.56684	0.58071	0.10858	-1669.5	0.51539	0.12114	0.61299	-1667.27
23.0962	1.54095e-06	M00230	3891188	0.52406	0.42601	-225.804	0.62039	0	-214.256	3891188	0.52406	0.6059	-440.572	0.60087	0.62217	-440.548	0.6105	0.60478	-440.57	0.61065	0.59081	0.62752	-440.527	M00230	3891188	0.52406	0.60964	0	-654.848	0.6204	0	0.60562	-654.828
23.0928	1.54368e-06	M00418	6677454	0.47594	0.40861	-1277.48	0.52182	0.17033	-1265.93	6677454	0.47594	0.35652	-1323.54	0.38157	0.30089	-1323.07	0.26195	0.38634	-1321.52	0.26195	0.47825	0.25559	-1318.79	M00418	6677454	0.47594	0.41435	0.18499	-2439.27	0.52103	0.1615	0.35653	-2433.09
23.0698	1.56225e-06	D02309	19353362	0.29412	0.43169	-1339.21	0.53981	0.21614	-1327.67	19353362	0.29412	0.54823	-1944.57	0.62241	0.41297	-1939.11	0.62327	0.52735	-1943.1	0.62327	0.62165	0.41328	-1939.1	D02309	19353362	0.29412	0.54559	0.21506	-3272.26	0.53996	0.21506	0.54822	-3272.24
23.0368	1.5893e-06	K00555	2888167	0.73797	0.56241	-431.503	0.37443	0.97412	-419.985	2888167	0.73797	0.58789	-962.637	0.5833	0.60112	-962.615	0.48153	0.61142	-961.593	0.4811	0.62885	0.58287	-961.496	K00555	2888167	0.73797	0.53571	0.92081	-1387.1	0.37518	0.97333	0.58761	-1382.62
23.031	1.5941e-06	G00340.G00341	2160494	0.57219	0.73534	-1418.98	0.84669	0.50854	-1407.46	2160494	0.57219	0.77139	-2183.68	0.78691	0.74045	-2183.35	0.77886	0.76879	-2183.66	0.77893	0.79233	0.73863	-2183.31	G00340.G00341	2160494	0.57219	0.7936	0.52519	-3559.72	0.8515	0.50557	0.77138	-3557.53
22.9908	1.62779e-06	N02151	19350801	0.68449	0.66235	-1534.69	0.75439	0.40524	-1523.19	19350801	0.68449	0.64346	-2134.58	0.68503	0.56264	-2132.8	0.71869	0.62463	-2133.31	0.71871	0.66584	0.56913	-2132.47	N02151	19350801	0.68449	0.68045	0.42283	-3661.59	0.75456	0.40532	0.64333	-3657.77
22.9884	1.62982e-06	N01734	14884655	0.80749	0.87471	-2677.78	0.94995	0.6979	-2666.28	14884655	0.80749	0.84071	-3250.51	0.86343	0.7945	-3249.65	0.8002	0.84999	-3250.09	0.79997	0.89252	0.78735	-3248.34	N01734	14884655	0.80749	0.88099	0.71329	-5922.97	0.95013	0.69769	0.84025	-5916.79
22.9784	1.63832e-06	B01605	17480615	0.43316	0.77911	-736.129	0.67312	0.96832	-724.64	17480615	0.43316	0.73507	-1078.14	0.73213	0.74279	-1078.13	0.83046	0.71253	-1076.36	0.83048	0.67777	0.76365	-1075.78	B01605	17480615	0.43316	0.71479	0.96207	-1803.73	0.67311	0.96839	0.73505	-1802.78
22.9772	1.63934e-06	L01600	24540273	0.78075	0.78469	-896.168	0.67351	1	-884.679	24540273	0.78075	0.74864	-1567.81	0.68627	0.86931	-1563.19	0.64218	0.78198	-1564.55	0.64214	0.71909	0.85988	-1562.5	L01600	24540273	0.78075	0.72639	1	-2453.97	0.67326	1	0.74855	-2452.49
22.9756	1.64071e-06	C00731	15033899	0.74332	0.83493	-2636.35	0.76734	0.93614	-2624.86	15033899	0.74332	0.87696	-3080.62	0.86704	0.89836	-3080.19	0.89156	0.87197	-3080.41	0.89147	0.84919	0.90213	-3079.46	C00731	15033899	0.74332	0.84203	0.92785	-5668.88	0.7668	0.93534	0.87699	-5660.23
22.9358	1.67503e-06	N00361	1726973	0.62567	0.75282	-817.671	0.85195	0.49902	-806.203	1726973	0.62567	0.81018	-1496.78	0.81135	0.80602	-1496.77	0.82255	0.80748	-1496.74	0.82255	0.8071	0.80832	-1496.74	N00361	1726973	0.62567	0.82283	0.51003	-2303.66	0.85118	0.4993	0.80974	-2302.98
22.9256	1.68394e-06	F00251	1189341	0.57219	0.72179	-965.007	0.61695	0.99543	-953.544	1189341	0.57219	0.70349	-1459.97	0.66727	0.775	-1459.07	0.74716	0.69486	-1459.7	0.74716	0.62914	0.79435	-1457.99	F00251	1189341	0.57219	0.67444	0.97879	-2415.28	0.61692	0.9952	0.70312	-2413.51
22.9188	1.68991e-06	C01237	18140378	0.80214	0.76162	-1020.97	0.68361	1	-1009.51	18140378	0.80214	0.79452	-1906.41	0.79896	0.78027	-1906.35	0.86537	0.77644	-1904.74	0.8655	0.76329	0.79727	-1904.61	C01237	18140378	0.80214	0.76257	0.99998	-2919.67	0.68336	0.99999	0.79473	-2915.92
22.9162	1.6922e-06	A00799	4591752	0.85027	0.78791	-824.288	0.95888	0.3496	-812.83	4591752	0.85027	0.8034	-1066.01	0.75988	0.88507	-1065.46	0.5743	0.85341	-1062.25	0.57465	0.87371	0.82339	-1062.17	A00799	4591752	0.85027	0.85386	0.39064	-1881.51	0.95853	0.35006	0.80332	-1878.84
22.9102	1.69749e-06	G00542	3591510	0.62567	0.62095	-2383.87	0.71957	0.46658	-2372.42	3591510	0.62567	0.64374	-3068.1	0.68528	0.56522	-3065.53	0.67909	0.63361	-3067.61	0.67933	0.6906	0.56308	-3065.51	G00542	3591510	0.62567	0.66616	0.48037	-5411.74	0.71901	0.46852	0.64376	-5409.3
22.8358	1.76448e-06	M00241	4145854	0.68984	0.35763	-345.62	0.21998	0.70041	-334.202	4145854	0.68984	0.41378	-671.134	0.38492	0.46954	-670.654	0.20941	0.46082	-665.63	0.20941	0.48588	0.42556	-665.441	M00241	4145854	0.68984	0.3535	0.64175	-1012.2	0.22022	0.70023	0.41372	-1005.34
22.7994	1.79822e-06	A00531	2787017	0.79679	0.76381	-1735.26	0.89219	0.52597	-1723.86	2787017	0.79679	0.82903	-2255.8	0.88038	0.72182	-2253.6	0.81614	0.83265	-2255.77	0.81607	0.9302	0.69917	-2252.26	A00531	2787017	0.79679	0.84801	0.53543	-3863.66	0.89221	0.52367	0.82894	-3862.71
22.7656	1.83012e-06	N00138.N00139	638344	0.70053	0.61484	-6891.94	0.53441	0.74131	-6880.56	638344	0.70053	0.59895	-6658.6	0.60804	0.57679	-6658.33	0.5908	0.60087	-6658.58	0.59087	0.62269	0.57368	-6658.11	N00138.N00139	638344	0.70053	0.57872	0.73403	-13120.7	0.53665	0.73674	0.59782	-13118.9
22.7646	1.83108e-06	H01255.H01256	14813365	0.47594	0.46082	-2137.13	0.59326	0.23058	-2125.74	14813365	0.47594	0.45183	-2888.04	0.48258	0.39142	-2887.22	0.44058	0.45418	-2888.03	0.44058	0.50155	0.38586	-2886.92	H01255.H01256	14813365	0.47594	0.49373	0.24316	-4932.93	0.59468	0.22605	0.45187	-4929.11
22.6788	1.91469e-06	I00121.I00122	1052865	0.37968	0.52705	-5080.58	0.64009	0.2889	-5069.24	1052865	0.37968	0.52675	-6354	0.56192	0.4474	-6352.58	0.50812	0.53337	-6353.93	0.50812	0.5954	0.43916	-6351.77	I00121.I00122	1052865	0.37968	0.56351	0.31103	-11093.1	0.64301	0.29672	0.52684	-11090
22.659	1.93452e-06	I01144	14827168	0.96791	0.95238	-1849.31	0.98351	0.67424	-1837.98	14827168	0.96791	0.88674	-2845.95	0.91133	0.82986	-2845.01	0.84662	0.89573	-2845.59	0.84661	0.93777	0.82126	-2843.84	I01144	14827168	0.96791	0.93465	0.68064	-4649.89	0.98325	0.66757	0.88632	-4643.56
22.6546	1.93895e-06	F00572	2662915	0.91979	0.55901	-810.762	0.40765	1	-799.434	2662915	0.91979	0.45232	-1364.05	0.42389	0.52191	-1363.84	0.36513	0.46739	-1363.7	0.3647	0.44787	0.50378	-1363.65	F00572	2662915	0.91979	0.43642	0.99999	-2163.67	0.40774	0.99999	0.45228	-2163.48
22.6178	1.97645e-06	H00310.H00311	1831521	0.80214	0.54446	-1170.05	0.675	0.20447	-1158.74	1831521	0.80214	0.76343	-1628.67	0.72896	0.8343	-1628.05	0.4664	0.81794	-1619.88	0.4664	0.84642	0.76983	-1619.57	H00310.H00311	1831521	0.80214	0.73628	0.19233	-2788.6	0.67571	0.20459	0.76347	-2787.41
22.5384	2.05985e-06	D02088	17927143	0.62032	0.3479	-1202.1	0.25752	0.74489	-1190.83	17927143	0.62032	0.43308	-1980.96	0.44909	0.39696	-1980.72	0.35995	0.44499	-1980.37	0.35995	0.47722	0.38636	-1979.74	D02088	17927143	0.62032	0.37667	0.71176	-3178.86	0.25755	0.74468	0.43322	-3171.79
22.5288	2.07017e-06	D01289	7145886	0.54545	0.79364	-997.232	0.9382	0.44423	-985.967	7145886	0.54545	0.76351	-1528.34	0.77093	0.74457	-1528.28	0.61966	0.78913	-1526.76	0.61963	0.86877	0.68802	-1525.59	D01289	7145886	0.54545	0.81964	0.4971	-2519.69	0.93754	0.44445	0.76333	-2514.3
22.526	2.07318e-06	M00154	1151307	0.20856	0.10694	-2184.17	0.01151	0.33025	-2172.91	1151307	0.20856	0.05002	-3483.45	0.03626	0.08874	-3482.52	0.0204	0.05829	-3482.76	0.0204	0.0437	0.08675	-3482.26	M00154	1151307	0.20856	0.04266	0.31226	-5620.08	0.01169	0.31877	0.04983	-5619.2
22.5168	2.08314e-06	D00657.D00658	3212376	0.83957	0.62081	-1289.18	0.72099	0.39083	-1277.92	3212376	0.83957	0.67582	-1833.4	0.66836	0.69416	-1833.29	0.6464	0.68246	-1833.22	0.64656	0.67527	0.69193	-1833.19	D00657.D00658	3212376	0.83957	0.69048	0.39845	-3111.96	0.72032	0.39102	0.67546	-3111.32
22.4912	2.11109e-06	N03197	25375661	0.83957	0.91321	-1674.11	0.86615	1	-1662.86	25375661	0.83957	0.88374	-2332.08	0.8771	0.90048	-2331.87	0.92102	0.87528	-2331.36	0.92105	0.85253	0.90613	-2330.59	N03197	25375661	0.83957	0.87812	0.99999	-3957.35	0.86634	1	0.8837	-3957.14
22.4508	2.15596e-06	N03054	24744647	0.77005	0.62418	-579.178	0.45575	1	-567.953	24744647	0.77005	0.57757	-1229.11	0.58689	0.5551	-1229.04	0.52445	0.58509	-1228.96	0.52446	0.61449	0.54389	-1228.77	N03054	24744647	0.77005	0.54548	1	-1798.41	0.45565	0.99999	0.57728	-1797.06
22.4478	2.15933e-06	C00752	15232999	0.49198	0.25212	-172.514	0.07975	0.99456	-161.29	15232999	0.49198	0.13769	-475.74	0.05925	0.26627	-473.442	0.11471	0.13968	-475.715	0.11515	0.04152	0.27633	-473.183	C00752	15232999	0.49198	0.1244	0.96765	-637.475	0.07953	0.99466	0.13754	-637.03
22.4374	2.17105e-06	D01075.D01076	5328446	0.56684	0.48505	-2996.62	0.58052	0.29483	-2985.4	5328446	0.56684	0.50012	-4244.35	0.53097	0.43868	-4242.94	0.52378	0.49312	-4244.18	0.52378	0.53535	0.43769	-4242.92	D01075.D01076	5328446	0.56684	0.52519	0.29897	-7051.69	0.58112	0.2911	0.50004	-7049.58
22.435	2.17376e-06	J01286	13947377	0.29947	0.56287	-153.477	0.3567	1	-142.26	13947377	0.29947	0.6138	-380.27	0.54565	0.78997	-378.168	0.62729	0.61025	-380.253	0.62711	0.49815	0.81167	-377.395	J01286	13947377	0.29947	0.55106	0.99997	-527.863	0.35637	1	0.61384	-522.53
22.432	2.17716e-06	K00651	4231578	0.94118	0.87697	-2039.89	0.94942	0.65198	-2028.67	4231578	0.94118	0.88925	-3439.39	0.92312	0.81839	-3437.21	0.90821	0.88482	-3439.27	0.90821	0.93032	0.81619	-3437.09	K00651	4231578	0.94118	0.91016	0.66672	-5424.1	0.94926	0.65253	0.88925	-5421.83
22.431	2.1783e-06	H02167	21412790	0.68449	0.62293	-1895.12	0.71579	0.30467	-1883.9	21412790	0.68449	0.70959	-2605.29	0.71957	0.6838	-2605.12	0.70633	0.71053	-2605.29	0.70646	0.73444	0.67843	-2605.02	H02167	21412790	0.68449	0.71186	0.30578	-4489.2	0.71553	0.30495	0.70957	-4489.19
22.429	2.18057e-06	F01777.F01778	17353856	0.40107	0.70219	-887.897	0.81626	0.43337	-876.683	17353856	0.40107	0.69463	-1557.02	0.72035	0.63856	-1556.48	0.80581	0.66826	-1554.52	0.80581	0.66758	0.66893	-1554.52	F01777.F01778	17353856	0.40107	0.73334	0.46572	-2437.87	0.81619	0.43339	0.69466	-2433.7
22.417	2.19423e-06	D02364	19779945	0.54011	0.56843	-2134.73	0.7042	0.29145	-2123.52	19779945	0.54011	0.55651	-2447.05	0.60203	0.46134	-2445.96	0.49584	0.56999	-2446.7	0.49636	0.65466	0.44077	-2444.65	D02364	19779945	0.54011	0.60705	0.30377	-4573.71	0.70342	0.29163	0.55663	-4570.56
22.4048	2.20821e-06	M00994	16421347	0.87166	0.82515	-1762.83	0.93478	0.53835	-1751.63	16421347	0.87166	0.88787	-2959.53	0.90588	0.84337	-2958.8	0.90139	0.88398	-2959.46	0.90139	0.90833	0.84362	-2958.79	M00994	16421347	0.87166	0.8995	0.54647	-4653.8	0.93503	0.53362	0.88786	-4652.95
22.3868	2.22901e-06	D02536	20878435	0.37433	0.35601	-5000.67	0.43209	0.22867	-4989.47	20878435	0.37433	0.38718	-5609.4	0.36881	0.42172	-5608.65	0.31259	0.40887	-5606.85	0.31166	0.40396	0.416	-5606.82	D02536	20878435	0.37433	0.40197	0.23	-10324.7	0.43212	0.22792	0.38732	-10323.8
22.3738	2.24415e-06	C01223	18100100	0.71123	0.36769	-703.412	0.50789	0.09662	-692.225	18100100	0.71123	0.44132	-1237.88	0.43228	0.46456	-1237.79	0.20604	0.49915	-1229.89	0.20592	0.59217	0.38535	-1228.15	C01223	18100100	0.71123	0.46223	0.10286	-1893.91	0.51029	0.09069	0.44116	-1893.16
22.3662	2.25304e-06	I00788.I00789	12798176	0.93048	0.92712	-3879.5	0.99745	0.78466	-3868.32	12798176	0.93048	0.9507	-4535.9	0.95394	0.94354	-4535.84	0.98545	0.94023	-4534.51	0.98559	0.93311	0.94769	-4534.43	I00788.I00789	12798176	0.93048	0.96156	0.78742	-8307.68	0.99651	0.78207	0.95044	-8305.49
22.3336	2.29162e-06	K00137	615330	0.93583	0.91076	-2426.08	1	0.72894	-2414.91	615330	0.93583	0.89027	-2872.71	0.85289	0.95989	-2870.85	0.84749	0.90112	-2872.23	0.84791	0.85404	0.95977	-2870.85	K00137	615330	0.93583	0.92265	0.77156	-5166.94	0.99997	0.73723	0.89028	-5160.31
22.308	2.32237e-06	N01908	16098599	0.85561	0.74477	-1137.08	0.60763	1	-1125.93	16098599	0.85561	0.7905	-1546.13	0.78484	0.80605	-1546.08	0.76128	0.8005	-1545.95	0.76128	0.80097	0.79813	-1545.95	N01908	16098599	0.85561	0.73223	0.99821	-2677.82	0.60744	0.99998	0.78981	-2672.06
22.2886	2.34595e-06	B01546	17073864	0.92513	0.89838	-1087.71	0.99999	0.50735	-1076.57	17073864	0.92513	0.93019	-1976.01	0.96885	0.84559	-1973.71	0.84542	0.94206	-1975.01	0.84541	1	0.83503	-1969.86	B01546	17073864	0.92513	0.94649	0.53462	-3054.43	0.99999	0.50749	0.92999	-3052.58
22.285	2.35035e-06	M01161	17221838	0.65241	0.55528	-2151.3	0.63884	0.3435	-2140.16	17221838	0.65241	0.58908	-3522.64	0.58539	0.59877	-3522.61	0.46291	0.62681	-3517.69	0.4624	0.66404	0.57588	-3516.72	M01161	17221838	0.65241	0.60544	0.35168	-5623.87	0.6386	0.34716	0.58896	-5623
22.2768	2.36041e-06	N02763.N02764	23233029	0.86631	0.87395	-2399.67	0.96308	0.65092	-2388.54	23233029	0.86631	0.89558	-3695.28	0.90453	0.86697	-3695.03	0.8383	0.91205	-3694.32	0.83857	0.94406	0.85524	-3693.23	N02763.N02764	23233029	0.86631	0.91827	0.66252	-6085.81	0.96297	0.651	0.8953	-6083.81
22.2004	2.45623e-06	M00655	14174492	0.74866	0.75383	-1896.99	0.68046	0.91005	-1885.89	14174492	0.74866	0.69911	-2552.34	0.70293	0.68841	-2552.3	0.65392	0.71103	-2551.71	0.65391	0.73267	0.67718	-2551.3	M00655	14174492	0.74866	0.6927	0.90719	-4398.54	0.68042	0.90881	0.69926	-4398.4
22.169	2.49673e-06	D01942	17017620	0.88235	0.68757	-250.625	0.95354	0	-239.54	17017620	0.88235	0.83561	-441.727	0.85961	0.78044	-441.634	1	0.78604	-439.7	1	0.74775	0.85518	-439.556	D01942	17017620	0.88235	0.88254	0.0001	-682.336	0.95341	0	0.83543	-681.268
22.1568	2.51264e-06	L00857	15234316	0.86096	0.8646	-2041.73	0.9199	0.69715	-2030.65	15234316	0.86096	0.87979	-3102.96	0.87704	0.88852	-3102.9	0.90807	0.87075	-3102.28	0.908	0.85427	0.89571	-3101.82	L00857	15234316	0.86096	0.89311	0.70395	-5135.14	0.91956	0.697	0.87981	-5133.61
22.1542	2.51605e-06	B01581	17316276	0.51872	0.5459	-1446.26	0.43052	0.79576	-1435.19	17316276	0.51872	0.57413	-1816.8	0.57306	0.57786	-1816.79	0.59453	0.56862	-1816.72	0.5944	0.55934	0.58501	-1816.67	B01581	17316276	0.51872	0.5274	0.77246	-3256.49	0.43062	0.79545	0.57413	-3251.98
22.1412	2.53314e-06	E00183.E00184	984529	0.87166	0.88805	-2879.73	0.83434	0.98856	-2868.66	984529	0.87166	0.87709	-3775.28	0.87592	0.88038	-3775.28	0.93661	0.85749	-3772.22	0.93681	0.83063	0.89464	-3771.29	E00183.E00184	984529	0.87166	0.8629	0.98736	-6546.18	0.83413	0.98827	0.87692	-6544.91
22.0996	2.58864e-06	C01310.C01311.C01312	18461399	0.75401	0.90967	-1481.52	0.97868	0.75737	-1470.47	18461399	0.75401	0.91609	-2260	0.93961	0.87227	-2258.34	0.97475	0.90207	-2257.49	0.97467	0.92038	0.87896	-2257.06	C01310.C01311.C01312	18461399	0.75401	0.9328	0.77234	-3734.19	0.97868	0.75707	0.91623	-3730.48
22.0554	2.64893e-06	A01081	8660323	0.74332	0.72408	-939.236	0.79517	0.39596	-928.209	8660323	0.74332	0.81661	-1563.09	0.80334	0.84128	-1562.9	0.72599	0.82961	-1561.91	0.72598	0.82924	0.83053	-1561.91	A01081	8660323	0.74332	0.80857	0.39322	-2491.47	0.79506	0.39601	0.81657	-2491.3
22.0522	2.65335e-06	F02083	19167898	0.39572	0.58525	-1683.37	0.48418	0.825	-1672.35	19167898	0.39572	0.55212	-2473.6	0.54414	0.57445	-2473.46	0.60179	0.54125	-2473.13	0.60179	0.51086	0.58567	-2472.58	F02083	19167898	0.39572	0.53076	0.81136	-4147.2	0.4841	0.82465	0.55251	-4145.94
22.0484	2.65861e-06	B01766	18297928	0.68984	0.88489	-994.183	0.96084	0.72317	-983.158	18297928	0.68984	0.93502	-1260.06	0.97115	0.87277	-1255.93	0.94939	0.93331	-1259.98	0.94904	0.9766	0.87017	-1255.6	B01766	18297928	0.68984	0.94215	0.72953	-2243.9	0.96069	0.72292	0.93508	-2243.22
22.035	2.67724e-06	H01481	16271342	0.68984	0.86771	-500.79	0.79	1	-489.773	16271342	0.68984	0.83035	-1030.85	0.82747	0.83809	-1030.82	0.86952	0.82194	-1030.39	0.86952	0.80493	0.84709	-1030.15	H01481	16271342	0.68984	0.81748	1	-1521.27	0.79012	1	0.83019	-1520.62
22.026	2.68982e-06	F02122	19320826	0.92513	0.55219	-362.767	0.27281	1	-351.754	19320826	0.92513	0.71519	-959.036	0.6644	0.8292	-958.721	0.75867	0.70375	-958.971	0.75863	0.59477	0.87536	-958.298	F02122	19320826	0.92513	0.59075	0.99998	-1318.54	0.27247	1	0.71456	-1310.79
21.9748	2.76254e-06	H01323	15470306	0.48128	0.45938	-1649.3	0.37148	0.70517	-1638.31	15470306	0.48128	0.53033	-2531.88	0.52937	0.53298	-2531.87	0.52269	0.53213	-2531.86	0.52269	0.53213	0.53196	-2531.86	H01323	15470306	0.48128	0.47801	0.68242	-4177.86	0.3714	0.70496	0.53034	-4170.19
21.9376	2.81661e-06	E01350	16761961	0.86096	0.86983	-831.965	0.82413	1	-820.997	16761961	0.86096	0.82451	-1051.32	0.82424	0.8245	-1051.32	0.86649	0.81315	-1050.58	0.86649	0.79821	0.83352	-1050.39	E01350	16761961	0.86096	0.82431	1	-1872.31	0.82425	1	0.82431	-1872.31
21.9308	2.82661e-06	L01379.L01380.L01381	23250457	0.79679	0.66702	-1951.08	0.56326	0.8954	-1940.11	23250457	0.79679	0.74575	-3046.25	0.73663	0.76617	-3046.11	0.71071	0.75437	-3045.97	0.71061	0.74711	0.7632	-3045.95	L01379.L01380.L01381	23250457	0.79679	0.68601	0.86726	-4914.5	0.56138	0.89382	0.74496	-4905.77
21.9072	2.86158e-06	A00580	3085491	0.35829	0.35544	-445.677	0.16983	0.99998	-434.724	3085491	0.35829	0.26534	-840.577	0.22141	0.35516	-840.017	0.22421	0.27471	-840.452	0.22421	0.21852	0.35616	-840.015	A00580	3085491	0.35829	0.2379	0.98374	-1276.23	0.17041	0.9999	0.26544	-1275.3
21.9042	2.86606e-06	H00828	6167057	0.48663	0.52994	-2810.5	0.44487	0.68786	-2799.54	6167057	0.48663	0.48857	-3860.8	0.44558	0.56554	-3857.92	0.44558	0.50007	-3860.21	0.44558	0.44567	0.56553	-3857.92	H00828	6167057	0.48663	0.47417	0.6841	-6615.68	0.44535	0.688	0.48863	-6614.94
21.8894	2.88825e-06	I00628	11846067	0.36364	0.59794	-1769.79	0.49445	0.84415	-1758.84	11846067	0.36364	0.58532	-2363.2	0.5581	0.63732	-2362.69	0.58899	0.58472	-2363.2	0.58896	0.54553	0.64308	-2362.56	I00628	11846067	0.36364	0.5537	0.83011	-4124.01	0.49451	0.84358	0.58533	-4122.05
21.8818	2.89971e-06	N00159.N00160.N00161	725703	0.79144	0.83457	-2251.52	0.93533	0.50621	-2240.58	725703	0.79144	0.83729	-3166.95	0.82464	0.86567	-3166.68	0.80041	0.8433	-3166.76	0.80045	0.82616	0.86534	-3166.61	N00159.N00160.N00161	725703	0.79144	0.86451	0.53567	-5410.39	0.93518	0.50711	0.83733	-5407.53
21.879	2.90395e-06	G01173.G01174	15478878	0.68984	0.79209	-4901.09	0.89338	0.64363	-4890.15	15478878	0.68984	0.81035	-5607.97	0.81397	0.80032	-5607.93	0.80508	0.81241	-5607.95	0.80545	0.82139	0.79895	-5607.89	G01173.G01174	15478878	0.68984	0.83581	0.63231	-10152.8	0.89095	0.6283	0.81032	-10150.5
21.875	2.91e-06	C00352	9121344	0.38503	0.46808	-986.284	0.5708	0.1116	-975.346	9121344	0.38503	0.48365	-1420.02	0.4798	0.49639	-1420	0.41678	0.49896	-1419.4	0.4169	0.51041	0.48071	-1419.35	C00352	9121344	0.38503	0.51294	0.1305	-2396.99	0.57089	0.11169	0.48365	-2395.37
21.8502	2.94786e-06	L00504	6439243	0.68449	0.60471	-1294.21	0.49745	0.88005	-1283.28	6439243	0.68449	0.50773	-1986.06	0.47245	0.57992	-1985	0.46831	0.51919	-1985.76	0.46829	0.4742	0.57992	-1984.99	L00504	6439243	0.68449	0.50486	0.87767	-3269.36	0.49778	0.8793	0.50783	-3269.34
21.833	2.9744e-06	J00727	4315997	0.94118	0.88485	-1665.36	0.96766	0.64678	-1654.44	4315997	0.94118	0.93385	-2244.73	0.94616	0.90463	-2244.42	0.91415	0.93609	-2244.66	0.91383	0.95355	0.90232	-2244.2	J00727	4315997	0.94118	0.94491	0.65543	-3899.85	0.96751	0.64664	0.9338	-3899.17
21.8136	3.00463e-06	E00434	2382620	0.75936	0.67714	-1477.42	0.77607	0.35569	-1466.51	2382620	0.75936	0.84106	-1898.98	0.84487	0.82907	-1898.94	0.76035	0.85729	-1897.84	0.76034	0.88575	0.8097	-1897.28	E00434	2382620	0.75936	0.81863	0.34319	-3366.75	0.77574	0.35545	0.84107	-3365.49
21.793	3.03706e-06	D01139	5684399	0.8877	0.88482	-2528.54	0.96154	0.77981	-2517.64	5684399	0.8877	0.89069	-3309.53	0.89771	0.87172	-3309.23	0.9462	0.87424	-3307.03	0.94606	0.87045	0.87944	-3307.01	D01139	5684399	0.8877	0.90997	0.7927	-5831.34	0.96183	0.78006	0.89072	-5827.17
21.7876	3.04562e-06	G00913.G00914	8438119	0.83422	0.87637	-2703.08	0.81758	1	-2692.19	8438119	0.83422	0.88904	-3184.69	0.86954	0.92862	-3183.5	0.89894	0.88688	-3184.64	0.89916	0.85582	0.93202	-3183.01	G00913.G00914	8438119	0.83422	0.86612	1	-5749.96	0.81657	0.99999	0.88903	-5746.8
21.7434	3.1166e-06	B01004.B01005	8711134	0.74866	0.68681	-1577.68	0.76881	0.49376	-1566.81	8711134	0.74866	0.81156	-2778.47	0.80558	0.82658	-2778.36	0.81573	0.81012	-2778.47	0.81609	0.7954	0.82959	-2778.27	B01004.B01005	8711134	0.74866	0.79719	0.48939	-4346.14	0.76856	0.49315	0.81154	-4345.29
21.7046	3.18028e-06	L01794.L01795	25413145	0.19786	0.42229	-2415.37	0.29377	0.70314	-2404.52	25413145	0.19786	0.42913	-3244.75	0.31069	0.71821	-3234.86	0.41865	0.43189	-3244.73	0.41863	0.24015	0.74633	-3232.27	L01794.L01795	25413145	0.19786	0.38676	0.6837	-5652.41	0.29353	0.7028	0.42876	-5649.26
21.6978	3.19157e-06	F01057	5106416	0.69519	0.77905	-567.257	0.87273	0.48387	-556.408	5106416	0.69519	0.81754	-1119.97	0.81133	0.83285	-1119.88	0.77667	0.82405	-1119.7	0.77676	0.82005	0.8297	-1119.69	F01057	5106416	0.69519	0.83507	0.4984	-1677.53	0.87281	0.48376	0.8172	-1676.38
21.6606	3.25407e-06	F00618.F00619.F00620	2882806	0.6738	0.60486	-3850.24	0.51145	0.77151	-3839.41	2882806	0.6738	0.56307	-4181.64	0.56978	0.54595	-4181.53	0.60373	0.55161	-4181.18	0.60373	0.55274	0.54956	-4181.18	F00618.F00619.F00620	2882806	0.6738	0.54612	0.76316	-7699.64	0.5115	0.76772	0.5629	-7698.78
21.6514	3.26971e-06	K00958	13661842	0.59358	0.72263	-1633.89	0.63993	0.95662	-1623.06	13661842	0.59358	0.70974	-2558.32	0.70974	0.70974	-2558.32	0.80511	0.68854	-2556.18	0.8051	0.658	0.74439	-2555.65	K00958	13661842	0.59358	0.68755	0.94954	-4146.07	0.63842	0.95543	0.70979	-4144.51
21.5964	3.36483e-06	K00305	1408306	0.80214	0.74605	-1671.64	0.84055	0.47554	-1660.84	1408306	0.80214	0.72212	-2053.65	0.76483	0.64343	-2052.39	0.70459	0.72542	-2053.61	0.70453	0.79397	0.63199	-2051.78	K00305	1408306	0.80214	0.7676	0.50063	-3718.34	0.84053	0.47538	0.72177	-3714.49
21.546	3.45442e-06	F00032	171748	0.52406	0.74823	-1485.57	0.87805	0.47359	-1474.8	171748	0.52406	0.78604	-1822.07	0.85714	0.63107	-1817.31	0.8766	0.75991	-1820.45	0.87624	0.84716	0.63434	-1817.21	F00032	171748	0.52406	0.8136	0.49525	-3298.68	0.87755	0.47384	0.78565	-3296.87
21.5132	3.51401e-06	I00631.I00632	11862668	0.40107	0.33763	-2299.52	0.23982	0.60761	-2288.76	11862668	0.40107	0.23556	-3779.66	0.25634	0.18818	-3779.13	0.28619	0.22071	-3779.04	0.28626	0.23922	0.19364	-3778.87	I00631.I00632	11862668	0.40107	0.23745	0.60814	-5988.03	0.24133	0.60747	0.23568	-5988.03
21.5058	3.5276e-06	J00019.J00020.J00021	109731	0.41176	0.52079	-3360.23	0.42411	0.70817	-3349.47	109731	0.41176	0.51052	-4540.95	0.49666	0.54453	-4540.58	0.56019	0.49776	-4540.39	0.56022	0.45568	0.55417	-4539.31	J00019.J00020.J00021	109731	0.41176	0.48257	0.70875	-7759.85	0.42699	0.71607	0.51055	-7757.83
21.4956	3.54641e-06	E00153	841535	0.50802	0.42124	-2041.45	0.53372	0.1879	-2030.7	841535	0.50802	0.45407	-2305.55	0.43474	0.49196	-2305.23	0.43202	0.45901	-2305.47	0.43201	0.43568	0.49163	-2305.23	E00153	841535	0.50802	0.47873	0.20503	-4171.42	0.53114	0.19324	0.45415	-4170.07
21.4712	3.59183e-06	G00118.G00119	773776	0.7861	0.67464	-2151.2	0.76344	0.48455	-2140.47	773776	0.7861	0.57464	-2837.83	0.59236	0.53815	-2837.5	0.56536	0.57715	-2837.81	0.56536	0.61258	0.52823	-2837.22	G00118.G00119	773776	0.7861	0.63862	0.51411	-4990.77	0.76346	0.48467	0.57456	-4978.3
21.451	3.62987e-06	N01270	9077428	0.2246	0.14432	-721.456	0.06709	0.49963	-710.73	9077428	0.2246	0.12731	-1305.05	0.13383	0.1112	-1304.93	0.14714	0.12392	-1304.97	0.14754	0.13378	0.11066	-1304.9	N01270	9077428	0.2246	0.10838	0.4789	-2017.54	0.06726	0.49947	0.12726	-2015.78
21.437	3.65647e-06	I00196	2258218	0.35829	0.41126	-3112.01	0.31841	0.63146	-3101.29	2258218	0.35829	0.41524	-3757.18	0.35868	0.54454	-3753.11	0.35878	0.43154	-3756.37	0.35868	0.35694	0.54454	-3753.11	I00196	2258218	0.35829	0.38283	0.60757	-6705.16	0.32113	0.62474	0.41505	-6702.39
21.4242	3.68096e-06	K00332	1537017	0.63102	0.28128	-232.683	0.41622	0	-221.971	1537017	0.63102	0.54987	-485.783	0.50143	0.64908	-484.558	0.19193	0.61614	-472.775	0.19193	0.64094	0.57744	-472.573	K00332	1537017	0.63102	0.51544	0	-710.109	0.41637	0	0.54981	-707.753
21.3986	3.73043e-06	M00676	14400263	0.4385	0.14106	-199.976	0.06069	0.50582	-189.277	14400263	0.4385	0.2132	-548.707	0.23021	0.17402	-548.375	0.18986	0.21827	-548.605	0.18957	0.24921	0.16707	-548.02	M00676	14400263	0.4385	0.16449	0.45043	-746.235	0.05998	0.50291	0.21322	-737.983
21.388	3.75112e-06	F01276	6848207	0.29947	0.25604	-1062.68	0.38724	0.0174	-1051.99	6848207	0.29947	0.31005	-1824.45	0.31299	0.30246	-1824.44	0.42504	0.27974	-1822.7	0.42484	0.25245	0.3199	-1822.41	F01276	6848207	0.29947	0.33165	0.02441	-2877.28	0.38789	0.01664	0.31017	-2876.44
21.3828	3.7613e-06	C00614	14091527	0.60963	0.82392	-2521.59	0.74846	0.94349	-2510.9	14091527	0.60963	0.81677	-3310.22	0.78331	0.88434	-3307.51	0.79538	0.82291	-3310.01	0.79583	0.7751	0.88612	-3307.42	C00614	14091527	0.60963	0.79501	0.93827	-5683.38	0.7497	0.94338	0.81675	-5681.21
21.3762	3.77427e-06	D02197	18508678	0.8984	0.81219	-1722.47	0.7085	0.99147	-1711.78	18508678	0.8984	0.85161	-2930.34	0.83602	0.87875	-2929.99	0.80263	0.86095	-2929.84	0.80267	0.84921	0.87587	-2929.73	D02197	18508678	0.8984	0.80735	0.97138	-4648.01	0.70851	0.99122	0.8517	-4642.12
21.37	3.7865e-06	M00757.M00758.M00759	15070286	0.68449	0.80773	-2363.84	0.71836	0.99311	-2353.15	15070286	0.68449	0.86424	-2874.44	0.84691	0.8955	-2874.09	0.92214	0.84836	-2873	0.92204	0.78744	0.9218	-2871.05	M00757.M00758.M00759	15070286	0.68449	0.81615	0.96771	-5091.24	0.71838	0.99255	0.86436	-5083.59
21.3678	3.79085e-06	N00487	2419262	0.50802	0.58651	-292.274	0.72473	0.08225	-281.59	2419262	0.50802	0.58726	-638.836	0.61834	0.52755	-638.481	0.46419	0.60997	-637.806	0.46419	0.69166	0.4944	-636.415	N00487	2419262	0.50802	0.62844	0.10699	-922.624	0.72452	0.08187	0.58726	-920.425
21.319	3.88858e-06	F00433	2007921	0.50802	0.5567	-1106.12	0.65044	0.28553	-1095.46	2007921	0.50802	0.55509	-1744.23	0.6107	0.44716	-1741.1	0.59239	0.54705	-1743.98	0.5924	0.62003	0.44414	-1741.02	F00433	2007921	0.50802	0.58736	0.30715	-2842.25	0.65044	0.28553	0.55508	-2839.69
21.2852	3.95775e-06	H01649	17174425	0.8877	0.92225	-1416.58	1	0.65672	-1405.94	17174425	0.8877	0.92522	-2175.4	0.92235	0.93392	-2175.37	0.89644	0.92975	-2175.21	0.89644	0.92934	0.93132	-2175.21	H01649	17174425	0.8877	0.94501	0.67449	-3537.43	0.99999	0.6489	0.9254	-3533.7
21.2798	3.96892e-06	M01776	20108981	0.6738	0.80183	-779.002	0.88876	0.51102	-768.362	20108981	0.6738	0.77566	-1174.22	0.80515	0.71144	-1173.36	0.81842	0.76677	-1173.84	0.81807	0.79827	0.71555	-1173.31	M01776	20108981	0.6738	0.81251	0.55058	-1947.36	0.88897	0.51175	0.7753	-1942.58
21.2772	3.97431e-06	K00999	14488717	0.46524	0.69956	-456.523	0.57522	1	-445.885	14488717	0.46524	0.58732	-1094.64	0.4591	0.83715	-1087.71	0.62354	0.58096	-1094.53	0.62334	0.39166	0.8637	-1085.11	K00999	14488717	0.46524	0.58406	1	-1540.54	0.5751	1	0.58745	-1540.52
21.269	3.99134e-06	L00575	7606938	0.70053	0.76651	-3714.53	0.69754	0.89046	-3703.9	7606938	0.70053	0.79095	-3971.06	0.78208	0.81075	-3970.76	0.83289	0.77941	-3970.12	0.83289	0.74914	0.81711	-3968.96	L00575	7606938	0.70053	0.76064	0.88381	-7646.7	0.69733	0.88949	0.79094	-7641.92
21.2634	4.00302e-06	B01912	18997129	0.3262	0.78079	-184.086	0.9685	0.32575	-173.454	18997129	0.3262	0.78629	-195.032	0.80841	0.74394	-194.936	0.92458	0.75708	-193.872	0.92458	0.73235	0.79138	-193.816	B01912	18997129	0.3262	0.84817	0.38777	-372.448	0.9685	0.32559	0.78622	-368.486
21.2624	4.00511e-06	J01622	17786854	0.6631	0.57416	-423.13	0.431	0.87919	-412.498	17786854	0.6631	0.49946	-728.307	0.47153	0.56354	-727.73	0.51421	0.49446	-728.259	0.51419	0.42786	0.58556	-727.098	J01622	17786854	0.6631	0.48119	0.86069	-1141.63	0.43122	0.87897	0.49968	-1140.81
21.2158	4.10368e-06	I00096	784218	0.91444	0.62106	-873.73	0.76536	0.29609	-863.122	784218	0.91444	0.73458	-1464.52	0.82469	0.54175	-1459.28	0.68501	0.74896	-1464.16	0.685	0.90217	0.51469	-1455.74	I00096	784218	0.91444	0.7436	0.30329	-2327.78	0.7642	0.29667	0.73448	-2327.64
21.1504	4.24613e-06	H02447	24296957	0.52941	0.68945	-1025.55	0.80262	0.38884	-1014.97	24296957	0.52941	0.76747	-2146.96	0.82503	0.64169	-2142.9	0.75184	0.77225	-2146.89	0.75161	0.87517	0.62339	-2140.82	H02447	24296957	0.52941	0.77753	0.39886	-3162.25	0.80224	0.38919	0.76748	-3161.93
21.1488	4.24967e-06	D01040.D01041	5179873	0.62032	0.66584	-1547.89	0.76344	0.34058	-1537.31	5179873	0.62032	0.63719	-2222.31	0.64285	0.62097	-2222.25	0.63282	0.63793	-2222.31	0.63284	0.65328	0.61589	-2222.21	D01040.D01041	5179873	0.62032	0.67872	0.37829	-3763.92	0.76344	0.34062	0.63669	-3759.63
21.1006	4.35792e-06	D00444	2083626	0.63102	0.75168	-1439.02	0.66396	1	-1428.47	2083626	0.63102	0.64813	-2264.07	0.6265	0.69682	-2263.57	0.77605	0.62035	-2261.62	0.77594	0.56428	0.7133	-2259.7	D00444	2083626	0.63102	0.65331	0.99995	-3692.6	0.66397	0.99998	0.64803	-3692.54
21.0948	4.37113e-06	D00687	3350970	0.8877	0.9054	-1701.91	0.84979	1	-1691.37	3350970	0.8877	0.90287	-2264.38	0.88015	0.9479	-2263.27	0.92162	0.89767	-2264.2	0.92162	0.85378	0.95454	-2262.33	D00687	3350970	0.8877	0.88358	1	-3957.24	0.84992	1	0.90268	-3955.75
21.0864	4.39033e-06	J00560	3082653	0.87701	0.94955	-948.177	0.90533	1	-937.634	3082653	0.87701	0.91771	-1540.15	0.92532	0.90271	-1539.93	0.97201	0.90068	-1536.8	0.97201	0.89217	0.91163	-1536.68	J00560	3082653	0.87701	0.91398	1	-2477.91	0.90521	1	0.91776	-2477.78
21.0626	4.4452e-06	H00060	272695	0.95187	0.72388	-2559.48	0.83813	0.44882	-2548.95	272695	0.95187	0.83213	-3182.52	0.84431	0.80454	-3182.31	0.73643	0.85279	-3181.14	0.73701	0.90486	0.78547	-3179.83	H00060	272695	0.95187	0.83288	0.44841	-5375.77	0.83398	0.44811	0.83189	-5375.77
21.056	4.46054e-06	F01642	16287063	0.40642	0.43309	-1224.53	0.31879	0.92041	-1214	16287063	0.40642	0.25979	-1830.01	0.25221	0.27656	-1829.95	0.3996	0.24366	-1828.8	0.39954	0.20698	0.29705	-1828.28	F01642	16287063	0.40642	0.27932	0.93884	-3044.63	0.31864	0.92079	0.25974	-3044.01
21.0464	4.48294e-06	F02069	19086393	0.86096	0.76686	-1322.18	0.85295	0.42372	-1311.65	19086393	0.86096	0.87042	-2283.42	0.86602	0.88214	-2283.36	0.77342	0.89247	-2281.03	0.77424	0.90435	0.87276	-2280.82	F02069	19086393	0.86096	0.86465	0.42002	-3595.2	0.85286	0.42374	0.87044	-3595.08
21.036	4.50734e-06	N02956	24278735	0.6738	0.66648	-788.619	0.82294	0.37102	-778.101	24278735	0.6738	0.63369	-1066.04	0.6059	0.68616	-1065.66	0.48974	0.66995	-1063.45	0.48943	0.68568	0.6486	-1063.38	N02956	24278735	0.6738	0.69082	0.43346	-1849.86	0.82203	0.37156	0.6336	-1844.14
21.0346	4.51064e-06	H01833	18249594	0.52941	0.80623	-3130.18	0.88824	0.61549	-3119.66	18249594	0.52941	0.8072	-4300.19	0.83524	0.74412	-4298.69	0.77333	0.81861	-4299.77	0.77333	0.87545	0.73487	-4296.79	H01833	18249594	0.52941	0.83394	0.62315	-7422.56	0.88808	0.61545	0.80721	-7419.85
20.986	4.62652e-06	E00907	9703912	0.66845	0.53422	-1001.87	0.65123	0.22674	-991.382	9703912	0.66845	0.67591	-1396.14	0.74642	0.53762	-1391.85	0.74026	0.66038	-1395.41	0.74026	0.74966	0.53646	-1391.84	E00907	9703912	0.66845	0.66793	0.21474	-2337.99	0.65125	0.22028	0.67592	-2337.85
20.9644	4.67898e-06	G00645	4349091	0.59358	0.76171	-2333.54	0.6816	0.969	-2323.06	4349091	0.59358	0.79822	-3730.07	0.79161	0.81428	-3729.95	0.8114	0.79409	-3730	0.81147	0.77676	0.81679	-3729.73	G00645	4349091	0.59358	0.7598	0.96116	-6000.63	0.6803	0.97704	0.79811	-5995.72
20.953	4.7069e-06	F01955	18349936	0.94118	0.85555	-4340.95	0.79806	0.94502	-4330.48	18349936	0.94118	0.84026	-5061.83	0.80558	0.90513	-5057.82	0.88613	0.82866	-5060.49	0.88613	0.76197	0.91244	-5053.33	F01955	18349936	0.94118	0.82684	0.94259	-9229.64	0.79647	0.94383	0.84036	-9228.31
20.9488	4.71723e-06	F01196	6001320	0.7861	0.86874	-1337.57	0.94775	0.52978	-1327.1	6001320	0.7861	0.90862	-2548.59	0.90133	0.92508	-2548.47	0.88474	0.91655	-2548.38	0.88451	0.91052	0.92221	-2548.37	F01196	6001320	0.7861	0.9217	0.53942	-3876.4	0.94766	0.52984	0.90854	-3875.69
20.9354	4.75034e-06	N01325	9579421	0.56684	0.63905	-1119.25	0.73419	0.43215	-1108.79	9579421	0.56684	0.70237	-1757.67	0.72663	0.64766	-1756.68	0.70109	0.70237	-1757.67	0.70111	0.74023	0.64278	-1756.43	N01325	9579421	0.56684	0.71181	0.43822	-2866.84	0.7337	0.43225	0.702	-2866.46
20.9242	4.7782e-06	K00957	13650613	0.41711	0.29846	-1827.13	0.43689	0	-1816.66	13650613	0.41711	0.35219	-2730.72	0.29501	0.46291	-2729.14	0.07195	0.41067	-2721.8	0.07195	0.40943	0.41282	-2721.8	K00957	13650613	0.41711	0.3757	8e-05	-4548.27	0.43689	0	0.35234	-4547.39
20.92	4.78869e-06	D00623	3025539	0.81818	0.80714	-2223.97	0.72715	0.93995	-2213.51	3025539	0.81818	0.83646	-2595.03	0.80879	0.88779	-2593.68	0.80362	0.84474	-2594.59	0.80377	0.81074	0.88719	-2593.67	D00623	3025539	0.81818	0.80201	0.92947	-4717.38	0.72666	0.9397	0.83656	-4712.01
20.8766	4.89842e-06	J01244	13119379	0.45989	0.58981	-786.534	0.68439	0.36358	-776.096	13119379	0.45989	0.54149	-1564.06	0.6109	0.39771	-1557.81	0.66322	0.50671	-1559.77	0.66321	0.57727	0.40844	-1556.76	J01244	13119379	0.45989	0.58554	0.39369	-2346.64	0.68412	0.36356	0.54149	-2340.16
20.8764	4.89893e-06	N03206	25406010	0.63636	0.58371	-1431.52	0.46905	0.9104	-1421.08	25406010	0.63636	0.42167	-2185.46	0.4333	0.38845	-2185.31	0.55759	0.38645	-2183.34	0.55862	0.3751	0.40396	-2183.29	N03206	25406010	0.63636	0.43707	0.91518	-3606.85	0.46798	0.90969	0.42182	-3606.54
20.8488	4.97004e-06	H01770	17915905	0.36364	0.2494	-1056.04	0.14229	0.46337	-1045.61	17915905	0.36364	0.28103	-1564.87	0.26956	0.30433	-1564.7	0.2528	0.28836	-1564.65	0.25329	0.27861	0.30071	-1564.61	H01770	17915905	0.36364	0.24181	0.41885	-2583.78	0.1414	0.46804	0.28096	-2577.03
20.8446	4.98095e-06	M01145	17155525	0.62032	0.6464	-956.444	0.55517	0.87873	-946.022	17155525	0.62032	0.63727	-1642.53	0.64088	0.62872	-1642.51	0.51241	0.65757	-1640.14	0.51278	0.69064	0.60951	-1639.4	M01145	17155525	0.62032	0.61185	0.8648	-2590.56	0.55514	0.87834	0.63727	-2588.56
20.8428	4.98563e-06	K00631	3389002	0.64706	0.79019	-691.946	0.70695	0.9685	-681.525	3389002	0.64706	0.80353	-1003.74	0.79954	0.81544	-1003.68	0.7883	0.808	-1003.65	0.78799	0.8034	0.81362	-1003.64	K00631	3389002	0.64706	0.77208	0.95173	-1688.71	0.70716	0.96844	0.80355	-1685.26
20.8418	4.98823e-06	I01175	14969921	0.77005	0.87173	-2129.11	0.82172	0.99452	-2118.69	14969921	0.77005	0.84568	-2462.99	0.84434	0.84831	-2462.98	0.83066	0.84881	-2462.89	0.83025	0.85006	0.84717	-2462.89	I01175	14969921	0.77005	0.83721	0.99224	-4252.91	0.82104	0.99404	0.8454	-4252.52
20.8404	4.99188e-06	H01973	19161008	0.64171	0.46502	-868.198	0.35325	0.75487	-857.778	19161008	0.64171	0.48179	-1525.68	0.48484	0.4725	-1525.66	0.45968	0.48812	-1525.59	0.45965	0.50089	0.46619	-1525.5	H01973	19161008	0.64171	0.44134	0.72483	-2387.07	0.35327	0.75425	0.482	-2383.46
20.8374	4.99971e-06	N02546	22082351	0.45455	0.53716	-3034.56	0.4552	0.70854	-3024.14	22082351	0.45455	0.51609	-3303.88	0.50491	0.54701	-3303.55	0.50207	0.5198	-3303.82	0.50206	0.50085	0.5482	-3303.54	N02546	22082351	0.45455	0.49517	0.70636	-6170.56	0.45572	0.71091	0.51608	-6169.23
20.834	5.00859e-06	H00028	151822	0.92513	0.9255	-2899.16	1	0.69362	-2888.74	151822	0.92513	0.96763	-3368.77	0.97265	0.956	-3368.68	0.99996	0.96268	-3368.36	1	0.96621	0.95798	-3368.34	H00028	151822	0.92513	0.97671	0.69805	-6258.49	0.99999	0.69393	0.96747	-6257.51
20.8168	5.05377e-06	N01785	15155983	0.50267	0.54674	-2704.44	0.43274	0.76857	-2694.03	15155983	0.50267	0.52542	-3045.95	0.49999	0.57567	-3045.37	0.5063	0.53015	-3045.88	0.50543	0.4973	0.57649	-3045.36	N01785	15155983	0.50267	0.49606	0.75517	-5741.86	0.43167	0.76837	0.52542	-5739.98
20.81	5.07175e-06	J01717	18340573	0.79144	0.76176	-602.325	0.95555	0.08984	-591.92	18340573	0.79144	0.73981	-1240.68	0.7962	0.62883	-1240.01	0.70188	0.74484	-1240.64	0.7007	0.8245	0.61325	-1239.68	J01717	18340573	0.79144	0.80175	0.17866	-1836.02	0.95517	0.08995	0.73971	-1832.61
20.8026	5.09138e-06	I00003	13168	0.90374	0.84196	-6263.42	0.90215	0.74638	-6253.02	13168	0.90374	0.82416	-7613.21	0.82068	0.82963	-7613.17	0.77133	0.83867	-7611.48	0.77091	0.84855	0.82668	-7611.29	I00003	13168	0.90374	0.84887	0.75531	-13247.7	0.90171	0.75056	0.82363	-13242.3
20.7954	5.11056e-06	B01469	16587041	0.39572	0.51903	-2934.37	0.44218	0.7025	-2923.98	16587041	0.39572	0.48034	-3932.71	0.44552	0.55011	-3930.58	0.34683	0.52555	-3925.58	0.34667	0.51718	0.53564	-3925.53	B01469	16587041	0.39572	0.46776	0.69926	-6857.27	0.44227	0.70233	0.48056	-6856.69
20.7838	5.14161e-06	F00272	1298040	0.95722	0.94637	-1147.32	0.99999	0.30914	-1136.92	1298040	0.95722	0.9141	-2049.41	0.97707	0.78291	-2048.07	0.76468	0.92806	-2048.68	0.76458	0.99999	0.77345	-2046.49	F00272	1298040	0.95722	0.95099	0.31272	-3187.95	0.99999	0.30903	0.91375	-3186.34
20.7788	5.15505e-06	H00944	6961967	0.1016	0.13582	-1112.02	0.03614	0.54288	-1101.64	6961967	0.1016	0.06431	-1712.01	0.04589	0.10677	-1711.36	0.03626	0.0704	-1711.72	0.03621	0.04938	0.10378	-1711.32	H00944	6961967	0.1016	0.05704	0.53423	-2814	0.03629	0.54303	0.06416	-2813.65
20.7612	5.20264e-06	N02689	22908455	0.94118	0.8947	-277.932	1	0.33503	-267.551	22908455	0.94118	0.87735	-998.569	0.8763	0.87953	-998.567	0.99999	0.86823	-996.873	0.99999	0.85387	0.89067	-996.741	N02689	22908455	0.94118	0.9004	0.41339	-1271.48	1	0.33504	0.87719	-1266.12
20.7588	5.20917e-06	L01826	25531822	0.75401	0.69399	-911.429	0.89705	0.06585	-901.05	25531822	0.75401	0.64152	-1200.75	0.71027	0.49618	-1200.27	0.81385	0.60572	-1200.24	0.81372	0.66451	0.51486	-1200.06	L01826	25531822	0.75401	0.74221	0.07025	-2103.88	0.89749	0.06428	0.64149	-2101.8
20.7574	5.21297e-06	H00819	6084240	0.48128	0.50378	-574.449	0.67563	0.08023	-564.07	6084240	0.48128	0.5313	-954.99	0.51348	0.56876	-954.843	0.29509	0.5951	-948.799	0.29509	0.66134	0.50055	-947.846	H00819	6084240	0.48128	0.56989	0.12501	-1521.37	0.67538	0.08057	0.53142	-1519.06
20.7546	5.2206e-06	D02368.D02369	19811937	0.13369	0.0708	-1112.15	0	0.28728	-1101.78	19811937	0.13369	0.07228	-2045.76	0.09137	0.04027	-2044.85	0.07391	0.07195	-2045.76	0.07373	0.09884	0.0394	-2044.73	D02368.D02369	19811937	0.13369	0.05229	0.26675	-3151.74	1e-05	0.28586	0.07207	-3147.54
20.751	5.23043e-06	L01112	21562924	0.48663	0.19507	-451.757	0.07919	0.63041	-441.382	21562924	0.48663	0.14839	-776.957	0.14297	0.164	-776.906	0.16818	0.14507	-776.91	0.16818	0.12785	0.17194	-776.779	L01112	21562924	0.48663	0.12863	0.60505	-1219.5	0.07918	0.63017	0.14836	-1218.34
20.732	5.28258e-06	J01618	17750313	0.32086	0.59834	-1457.83	0.51329	0.81907	-1447.47	17750313	0.32086	0.52822	-2447.5	0.48959	0.60601	-2445.26	0.54425	0.5244	-2447.43	0.54425	0.46387	0.61288	-2444.36	J01618	17750313	0.32086	0.52375	0.81345	-3860.12	0.5137	0.8161	0.52824	-3860.05
20.7268	5.29694e-06	B00638	3172415	0.28877	0.49214	-530.131	0.59928	0.07299	-519.767	3172415	0.28877	0.41301	-1029.97	0.43265	0.37818	-1029.72	0.31423	0.42737	-1029.15	0.31423	0.47027	0.36689	-1028.38	B00638	3172415	0.28877	0.47216	0.12661	-1555.85	0.59906	0.07308	0.41324	-1549.74
20.7222	5.30968e-06	F01583	15678040	0.40642	0.34519	-881.284	0.45975	0.03342	-870.923	15678040	0.40642	0.34864	-1760.46	0.35485	0.32939	-1760.39	0.3312	0.35221	-1760.42	0.33116	0.36897	0.32317	-1760.25	F01583	15678040	0.40642	0.37999	0.06046	-2633.78	0.45956	0.03507	0.34889	-2631.38
20.7026	5.36431e-06	K00072	349225	0.42246	0.51042	-918.797	0.62427	0.26397	-908.445	349225	0.42246	0.57226	-1529.53	0.60888	0.49837	-1528.29	0.65814	0.54658	-1528.04	0.65814	0.57602	0.50724	-1527.67	K00072	349225	0.42246	0.58829	0.27068	-2438.53	0.62425	0.26411	0.57226	-2437.97
20.696	5.38283e-06	D01620	12960501	0.70588	0.72692	-1623.45	0.64346	0.89951	-1613.1	12960501	0.70588	0.69846	-2414.31	0.72004	0.65289	-2413.53	0.83684	0.66493	-2408.88	0.83684	0.66493	0.66493	-2408.88	D01620	12960501	0.70588	0.68086	0.89306	-4028.43	0.64301	0.89942	0.69821	-4027.41
20.6934	5.39015e-06	G00122	783544	0.70588	0.76077	-851.984	0.6911	0.9802	-841.638	783544	0.70588	0.66157	-1493.93	0.67869	0.62442	-1493.62	0.68661	0.6557	-1493.8	0.68649	0.67549	0.62605	-1493.6	G00122	783544	0.70588	0.67184	0.98163	-2335.82	0.6905	0.98017	0.66142	-2335.56
20.681	5.42517e-06	J01399	15575617	0.8984	0.8544	-541.728	0.93468	0.50638	-531.387	15575617	0.8984	0.9128	-648.758	0.95086	0.84769	-647.269	1	0.90027	-645.845	1	0.92533	0.86486	-645.441	J01399	15575617	0.8984	0.92004	0.51611	-1180.42	0.93549	0.50794	0.91279	-1180.14
20.6692	5.4587e-06	K01424	23884711	0.78075	0.47456	-618.297	0.62473	0.12906	-607.962	23884711	0.78075	0.61869	-890.971	0.65793	0.53117	-890.023	0.66402	0.60756	-890.713	0.66418	0.65575	0.53295	-890.018	K01424	23884711	0.78075	0.62036	0.13181	-1498.94	0.62437	0.12931	0.61838	-1498.93
20.6646	5.47183e-06	E00886	8850367	0.82353	0.81532	-2313.68	0.70085	1	-2303.35	8850367	0.82353	0.78477	-2934.7	0.78477	0.78477	-2934.7	0.73779	0.80132	-2934.26	0.73779	0.82052	0.77593	-2934.11	E00886	8850367	0.82353	0.75872	0.99994	-5122.41	0.70548	0.99998	0.78496	-5121.29
20.6478	5.52006e-06	I00840	13094349	0.66845	0.40569	-1006.78	0.51278	0.16393	-996.454	13094349	0.66845	0.43661	-1522.98	0.4808	0.34823	-1521.12	0.50645	0.4189	-1522.07	0.50639	0.46769	0.35235	-1520.97	I00840	13094349	0.66845	0.46203	0.18042	-2520.85	0.51255	0.16385	0.43667	-2519.44
20.6412	5.53912e-06	F01768	17273011	0.85027	0.71272	-2405.9	0.80339	0.4952	-2395.58	17273011	0.85027	0.72484	-3043.72	0.70759	0.75733	-3043.37	0.66382	0.73684	-3043	0.66377	0.72654	0.7516	-3042.93	F01768	17273011	0.85027	0.75059	0.49783	-5344.39	0.80497	0.48515	0.72406	-5342.1
20.6136	5.61955e-06	D00491	2298705	0.93048	0.89171	-710.844	0.841	1	-700.538	2298705	0.93048	0.88114	-833.941	0.86498	0.91343	-833.463	0.94462	0.86416	-831.838	0.94462	0.81275	0.93177	-829.702	D00491	2298705	0.93048	0.86716	1	-1535.32	0.84103	1	0.88113	-1534.48
20.6128	5.6219e-06	N01141	8166409	0.41176	0.34182	-2144.16	0.42902	0.15293	-2133.85	8166409	0.41176	0.30632	-3212.65	0.3011	0.31836	-3212.6	0.33718	0.29725	-3212.36	0.33718	0.27264	0.32691	-3212.01	N01141	8166409	0.41176	0.3464	0.16644	-5303.57	0.4292	0.15485	0.3063	-5298.88
20.5986	5.66375e-06	L01162	22034553	0.62032	0.61897	-1480.33	0.54876	0.83695	-1470.03	22034553	0.62032	0.5918	-2543.1	0.60663	0.55633	-2542.72	0.568	0.59902	-2542.9	0.568	0.63431	0.54545	-2541.98	L01162	22034553	0.62032	0.57758	0.8317	-4013.82	0.54862	0.83652	0.59149	-4013.13
20.5926	5.68153e-06	L01043	20872569	0.79679	0.71795	-970.329	0.61518	0.88154	-960.033	20872569	0.79679	0.66381	-1432.36	0.58671	0.79539	-1425.39	0.59675	0.68163	-1431.27	0.59675	0.57998	0.79709	-1425.36	L01043	20872569	0.79679	0.64965	0.87567	-2393.04	0.61508	0.88135	0.66397	-2392.39
20.5752	5.73341e-06	A00520	2713568	0.7754	0.79066	-2826.07	0.71675	0.96555	-2815.78	2713568	0.7754	0.72719	-3478.07	0.70222	0.77952	-3477.12	0.6223	0.75061	-3475.63	0.62199	0.73736	0.77132	-3475.47	A00520	2713568	0.7754	0.72379	0.96159	-6194.5	0.71789	0.96296	0.72709	-6194.47
20.5746	5.7352e-06	E00287	1495164	0.37968	0.28913	-866.67	0.3589	0.0466	-856.382	1495164	0.37968	0.24756	-1669.47	0.21394	0.32172	-1667.97	0.1971	0.26117	-1668.68	0.1971	0.22454	0.31716	-1667.86	E00287	1495164	0.37968	0.28487	0.05598	-2529.92	0.35907	0.04625	0.2474	-2525.85
20.5328	5.86181e-06	I00267.I00268	3408344	0.86631	0.81498	-2965.99	0.88532	0.59091	-2955.73	3408344	0.86631	0.81377	-3724.97	0.8186	0.79968	-3724.9	0.79367	0.81915	-3724.85	0.79356	0.83281	0.79638	-3724.66	I00267.I00268	3408344	0.86631	0.83913	0.6021	-6587.93	0.88389	0.59408	0.81408	-6585.78
20.5208	5.89868e-06	D00372	1736189	0.82353	0.81458	-1275.86	0.89339	0.51728	-1265.6	1736189	0.82353	0.88307	-2339.33	0.9038	0.83552	-2338.12	0.90255	0.87697	-2339.11	0.9022	0.90491	0.8343	-2338.11	D00372	1736189	0.82353	0.88601	0.52046	-3604.99	0.89324	0.51731	0.88312	-3604.93
20.5024	5.95565e-06	I00732	12437919	0.71658	0.50924	-837.973	0.62654	0.26224	-827.722	12437919	0.71658	0.51066	-1148.09	0.54046	0.45147	-1147.61	0.53324	0.50465	-1148.01	0.53324	0.54577	0.44864	-1147.6	I00732	12437919	0.71658	0.54943	0.27926	-1978.4	0.62646	0.26257	0.51055	-1975.81
20.4946	5.97997e-06	K01371	23625967	0.28877	0.40771	-2615.4	0.33082	0.59239	-2605.15	23625967	0.28877	0.36323	-3303.52	0.34382	0.40069	-3302.89	0.39319	0.35531	-3303.24	0.39319	0.31595	0.40729	-3301.93	K01371	23625967	0.28877	0.35195	0.58884	-5909.1	0.33096	0.59224	0.36334	-5908.67
20.4944	5.9806e-06	B00798	4719201	0.6738	0.58152	-657.137	0.67969	0.28082	-646.889	4719201	0.6738	0.67637	-1471.65	0.67896	0.66727	-1471.63	0.69319	0.67054	-1471.56	0.69307	0.67013	0.67054	-1471.56	B00798	4719201	0.6738	0.67694	0.28183	-2118.54	0.67976	0.28097	0.67619	-2118.54
20.4802	6.02513e-06	A00662	3672045	0.64706	0.53978	-682.681	0.68237	0.06455	-672.441	3672045	0.64706	0.56645	-1333.15	0.61573	0.47844	-1332.08	0.54511	0.56946	-1333.12	0.54631	0.64086	0.46855	-1331.71	A00662	3672045	0.64706	0.59886	0.09655	-2007.3	0.68213	0.06509	0.56658	-2005.59
20.4344	6.17105e-06	E01068	13299643	0.19251	0.13907	-1694.58	0.19842	0	-1684.36	13299643	0.19251	0.13226	-2139.98	0.14289	0.10967	-2139.73	0.12035	0.13507	-2139.93	0.12035	0.15426	0.10559	-2139.49	E01068	13299643	0.19251	0.1559	0	-3826.6	0.19842	0	0.13229	-3824.34
20.431	6.18202e-06	B00071	343832	0.84492	0.77144	-425.598	1	0.1591	-415.383	343832	0.84492	0.94588	-739.148	0.9662	0.92617	-739.019	0.52768	0.97027	-734.186	0.52847	1	0.91818	-732.725	B00071	343832	0.84492	0.95702	0.1717	-1155.09	1	0.15921	0.94588	-1154.53
20.414	6.23718e-06	I00524	10842421	0.51872	0.56115	-1872.57	0.46029	0.84654	-1862.36	10842421	0.51872	0.57078	-2368.24	0.61002	0.49336	-2366.95	0.70843	0.53637	-2365.26	0.70841	0.55759	0.50724	-2365.07	I00524	10842421	0.51872	0.53317	0.82525	-4198.86	0.45929	0.84138	0.57077	-4196.22
20.4134	6.23914e-06	B01860	18735963	0.87166	0.31951	-475.567	0.44331	0.04761	-465.361	18735963	0.87166	0.36626	-828.435	0.38257	0.32326	-828.216	0.24194	0.41405	-825.26	0.24194	0.49671	0.28074	-823.072	B01860	18735963	0.87166	0.39118	0.05532	-1294.74	0.44326	0.04726	0.36628	-1293.8
20.4072	6.25939e-06	E00118	676167	0.37968	0.39415	-1878.62	0.29814	0.58799	-1868.42	676167	0.37968	0.40955	-2615.1	0.40739	0.41729	-2615.09	0.49439	0.38823	-2613.43	0.49439	0.34775	0.44853	-2612.66	E00118	676167	0.37968	0.37347	0.57036	-4487.33	0.29757	0.58794	0.40964	-4483.52
20.4014	6.27838e-06	A00550.A00551	2867636	0.59893	0.75365	-3365.89	0.65533	0.94115	-3355.69	2867636	0.59893	0.66556	-4096.83	0.66995	0.65583	-4096.8	0.64508	0.67043	-4096.75	0.64502	0.68361	0.65281	-4096.65	A00550.A00551	2867636	0.59893	0.66285	0.93856	-7365.13	0.6569	0.93991	0.66558	-7365.11
20.4	6.28298e-06	I01010.I01011	14128842	0.81283	0.75195	-3923.87	0.90161	0.50831	-3913.67	14128842	0.81283	0.73439	-5586.1	0.77962	0.63225	-5584.76	0.87592	0.69068	-5583.06	0.87482	0.7148	0.65358	-5582.9	I01010.I01011	14128842	0.81283	0.78202	0.52288	-9353.65	0.89703	0.50587	0.73464	-9349.73
20.3994	6.28495e-06	A00056.A00057.A00058	229758	0.91444	0.88212	-2979.88	0.96076	0.6731	-2969.68	229758	0.91444	0.90326	-4009.83	0.91144	0.87852	-4009.54	0.90663	0.90252	-4009.82	0.90693	0.91782	0.8773	-4009.5	A00056.A00057.A00058	229758	0.91444	0.91963	0.67423	-6817.91	0.96021	0.66381	0.90327	-6816.11
20.3972	6.29218e-06	J01049	6584934	0.73797	0.87305	-831.622	1	0.5043	-821.423	6584934	0.73797	0.75208	-1325.86	0.80576	0.62918	-1324.15	0.70302	0.76004	-1325.68	0.703	0.83935	0.61533	-1323.21	J01049	6584934	0.73797	0.81916	0.56952	-2156.84	1	0.5035	0.75192	-2147.28
20.3838	6.33639e-06	H01753.H01754	17706823	0.76471	0.56389	-1456.72	0.64273	0.35412	-1446.52	17706823	0.76471	0.53785	-2370.07	0.58069	0.44414	-2367.25	0.59104	0.52233	-2369.22	0.59118	0.57503	0.44584	-2367.21	H01753.H01754	17706823	0.76471	0.57321	0.3659	-3820.47	0.64268	0.35425	0.53789	-3816.59
20.378	6.35563e-06	J00580.J00581	3259944	0.55615	0.70796	-1397.18	0.62478	0.88637	-1386.99	3259944	0.55615	0.67654	-2023.88	0.69514	0.63596	-2023.41	0.73157	0.66288	-2023.04	0.73191	0.67493	0.64486	-2022.94	J00580.J00581	3259944	0.55615	0.65936	0.87877	-3411.83	0.62465	0.88573	0.67645	-3410.87
20.3706	6.38025e-06	H01934	18792442	0.27807	0.29568	-2395.05	0.21759	0.52961	-2384.86	18792442	0.27807	0.27797	-3154.48	0.24035	0.37381	-3152.29	0.20421	0.30107	-3152.66	0.20425	0.26282	0.36349	-3151.73	H01934	18792442	0.27807	0.25835	0.5336	-5409.19	0.21752	0.54135	0.27793	-5407.87
20.369	6.38559e-06	F01453	12651321	0.95187	0.81837	-1632.1	0.96495	0.53551	-1621.91	12651321	0.95187	0.89717	-2350.63	0.9263	0.8389	-2350.14	0.87178	0.90301	-2350.55	0.87181	0.95995	0.82346	-2349.63	F01453	12651321	0.95187	0.91748	0.55046	-3973.29	0.96478	0.53535	0.89696	-3972.54
20.3646	6.40029e-06	A00122.A00123	538432	0.17647	0.22565	-633.598	2e-05	0.71506	-623.416	538432	0.17647	0.04008	-929.462	0.04621	0.02067	-929.426	0.38597	0.01872	-925.525	0.38597	0	0.06661	-925.25	A00122.A00123	538432	0.17647	0.03214	0.70201	-1553.03	0.0003	0.71486	0.04033	-1552.88
20.3608	6.41301e-06	C00531	13231804	0.95722	0.87811	-1429.54	0.94619	0.62549	-1419.36	13231804	0.95722	0.94503	-2505.39	0.96296	0.90573	-2504.52	0.93612	0.9468	-2505.36	0.93654	0.97564	0.90006	-2504.03	C00531	13231804	0.95722	0.94531	0.62601	-3924.76	0.94531	0.62601	0.94492	-3924.76
20.3544	6.4345e-06	D00214	970994	0.78075	0.81001	-928.972	0.7347	1	-918.795	970994	0.78075	0.78923	-1602.27	0.80868	0.74601	-1601.73	0.81428	0.78275	-1602.1	0.81384	0.80618	0.74687	-1601.72	D00214	970994	0.78075	0.77206	0.99999	-2521.95	0.73435	1	0.78926	-2521.07
20.3528	6.43988e-06	A01012	7227720	0.62567	0.5649	-1324.05	0.43686	0.85862	-1313.87	7227720	0.62567	0.54374	-1885.42	0.48683	0.64547	-1883.65	0.66906	0.52089	-1883.89	0.66906	0.40729	0.67197	-1879.73	A01012	7227720	0.62567	0.50935	0.83741	-3201.24	0.43689	0.85831	0.54371	-3199.29
20.3416	6.47768e-06	N00123	549805	0.65775	0.77514	-2325.15	0.71354	0.91005	-2314.98	549805	0.65775	0.72791	-3465.45	0.72251	0.74256	-3465.35	0.75357	0.72067	-3465.18	0.7532	0.69998	0.74877	-3464.8	N00123	549805	0.65775	0.72261	0.91224	-5730.84	0.71165	0.9126	0.728	-5730.71
20.3392	6.48581e-06	M00459	6950191	0.34759	0.48591	-1426.1	0.40243	0.73058	-1415.93	6950191	0.34759	0.42144	-2448.94	0.3866	0.49212	-2447.48	0.3726	0.43513	-2448.31	0.3726	0.39589	0.48901	-2447.41	M00459	6950191	0.34759	0.41531	0.7278	-3864.99	0.40244	0.73029	0.42149	-3864.87
20.3392	6.48581e-06	D01200	6196051	0.92513	0.58563	-424.211	0.43192	0.94597	-414.041	6196051	0.92513	0.78042	-841.218	0.77304	0.80229	-841.136	0.63609	0.79344	-840.141	0.63574	0.79386	0.7921	-840.141	D01200	6196051	0.92513	0.68256	0.83752	-1271.76	0.4331	0.94525	0.78029	-1255.26
20.3354	6.49871e-06	B01673.B01674	17856256	0.28877	0.33102	-1605.56	0.41658	0.01977	-1595.39	17856256	0.28877	0.33894	-2722.5	0.31902	0.3803	-2722.13	0.33262	0.34056	-2722.49	0.33262	0.31313	0.38246	-2722.1	B01673.B01674	17856256	0.28877	0.36626	0.03276	-4319.3	0.41669	0.01905	0.33911	-4317.89
20.3332	6.50618e-06	N01240	8838292	0.57219	0.35991	-949.651	0.2187	0.88047	-939.485	8838292	0.57219	0.3447	-1443.64	0.29284	0.45821	-1442.06	0.17319	0.37935	-1440.74	0.17301	0.34276	0.43783	-1440.33	N01240	8838292	0.57219	0.30977	0.82739	-2385.29	0.21875	0.88003	0.34432	-2383.13
20.3278	6.52457e-06	C00697	14852182	0.74866	0.87225	-1100.96	0.97555	0.55324	-1090.8	14852182	0.74866	0.85577	-1365.4	0.85373	0.86056	-1365.4	0.7922	0.87059	-1364.89	0.79226	0.89276	0.84285	-1364.75	C00697	14852182	0.74866	0.89911	0.59345	-2460.37	0.97557	0.55309	0.85504	-2456.2
20.3276	6.52525e-06	C01339	18594850	0.32086	0.21602	-393.592	0.08705	0.87452	-383.428	18594850	0.32086	0.1454	-780.154	0.115	0.19721	-779.855	0.38826	0.13665	-779.409	0.38831	0.09109	0.20972	-778.784	C01339	18594850	0.32086	0.12615	0.86466	-1164.11	0.08691	0.87406	0.14525	-1163.58
20.3234	6.53959e-06	L00314	4194199	0.31551	0.73716	-576.843	0.64417	0.93436	-566.681	4194199	0.31551	0.5942	-1439.06	0.5524	0.67278	-1437.49	0.56697	0.60001	-1438.94	0.56713	0.54503	0.6751	-1437.44	L00314	4194199	0.31551	0.61028	0.94029	-2006.35	0.64414	0.93429	0.59421	-2005.74
20.323	6.54096e-06	H01064	8734493	0.65775	0.19946	-340.498	0.09658	0.50148	-330.337	8734493	0.65775	0.19721	-581.548	0.17202	0.2515	-580.897	0.17764	0.20432	-581.413	0.17764	0.16554	0.25558	-580.876	H01064	8734493	0.65775	0.16901	0.46357	-915.125	0.0959	0.50051	0.19731	-911.885
20.2998	6.62075e-06	F00599.F00600.F00601	2790600	0.74332	0.77018	-7353.48	0.70332	0.87237	-7343.33	2790600	0.74332	0.74503	-6967.34	0.74817	0.73865	-6967.31	0.76915	0.73802	-6967.05	0.76845	0.7353	0.74157	-6967.04	F00599.F00600.F00601	2790600	0.74332	0.73087	0.86785	-13962.5	0.70202	0.86846	0.74537	-13961.5
20.2968	6.63114e-06	M01947	20861938	0.79679	0.78015	-924.582	0.70295	0.9826	-914.433	20861938	0.79679	0.82639	-1422.95	0.82832	0.8207	-1422.94	0.94674	0.7978	-1418.78	0.94673	0.76388	0.84541	-1418.12	M01947	20861938	0.79679	0.78565	0.97797	-2341.78	0.7026	0.98285	0.82644	-2337.38
20.2776	6.69802e-06	D02231	18712719	0.94652	0.82214	-1414.7	0.88429	0.62027	-1404.56	18712719	0.94652	0.88032	-2508.97	0.86951	0.90446	-2508.47	0.8725	0.88294	-2508.92	0.87264	0.86715	0.90486	-2508.46	D02231	18712719	0.94652	0.88153	0.62072	-3913.54	0.88423	0.62011	0.8804	-3913.53
20.2698	6.72538e-06	D00481	2256485	0.94118	0.85809	-536.647	0.99999	0.18186	-526.512	2256485	0.94118	0.72273	-682.652	0.77289	0.62979	-682.457	0.86572	0.69368	-682.31	0.86573	0.72355	0.65446	-682.277	D00481	2256485	0.94118	0.90755	0.2239	-1214.01	1	0.18204	0.72308	-1209.16
20.2612	6.75568e-06	C00493.C00494	12644388	0.70053	0.58464	-1572.26	0.71596	0.25074	-1562.13	12644388	0.70053	0.57481	-2100.87	0.57623	0.56954	-2100.87	0.63335	0.56065	-2100.53	0.63339	0.54669	0.58295	-2100.47	C00493.C00494	12644388	0.70053	0.61871	0.2706	-3538.32	0.71062	0.25208	0.57471	-3535.83
20.2452	6.81242e-06	H00003.H00004.H00005.H00006.H00007	47417	0.12299	0.18325	-3418.76	0.10743	0.3772	-3408.64	47417	0.12299	0.14655	-4807.3	0.12381	0.1914	-4806.41	0.1344	0.14966	-4807.25	0.1344	0.11803	0.19281	-4806.36	H00003.H00004.H00005.H00006.H00007	47417	0.12299	0.13283	0.38033	-8140.31	0.10703	0.38604	0.14579	-8139.57
20.2406	6.82882e-06	H02023	19505963	0.65241	0.73554	-1435.3	0.65852	0.91287	-1425.18	19505963	0.65241	0.65986	-1877.28	0.63821	0.70679	-1876.64	0.63911	0.6653	-1877.16	0.63908	0.63713	0.70717	-1876.64	H02023	19505963	0.65241	0.65914	0.91258	-3302.46	0.65787	0.91258	0.65971	-3302.46
20.234	6.85242e-06	F01996	18609382	0.7861	0.57303	-1189.91	0.77028	0.0558	-1179.79	18609382	0.7861	0.6267	-1824.88	0.63029	0.61203	-1824.86	0.46743	0.66789	-1823.07	0.46743	0.75492	0.53411	-1822.08	F01996	18609382	0.7861	0.66851	0.10387	-3006.47	0.7699	0.05546	0.62607	-3004.67
20.2202	6.90203e-06	E00251	1290084	0.73797	0.86203	-669.503	0.79934	0.96897	-659.393	1290084	0.73797	0.86472	-1021.91	0.84478	0.90209	-1020.84	0.87493	0.86217	-1021.85	0.87507	0.82683	0.90737	-1020.22	E00251	1290084	0.73797	0.84384	0.96191	-1684.02	0.79943	0.96904	0.86473	-1681.31
20.218	6.90997e-06	H01556	16701432	0.90909	0.83216	-1041.6	0.75442	0.95836	-1031.49	16701432	0.90909	0.7309	-1501.04	0.69035	0.80737	-1498.5	0.7222	0.73315	-1501.02	0.72261	0.67239	0.81025	-1498.15	H01556	16701432	0.90909	0.73913	0.95997	-2493.79	0.75601	0.95799	0.73075	-2493.56
20.2152	6.92009e-06	G00572	3812226	0.8984	0.46275	-460.612	0.29241	0.93734	-450.505	3812226	0.8984	0.39853	-791.457	0.30493	0.58483	-788.419	0.17702	0.45421	-787.619	0.17667	0.38143	0.55674	-786.694	G00572	3812226	0.8984	0.36625	0.91101	-1243	0.29248	0.93653	0.39867	-1241.96
20.1728	7.07519e-06	B01172	13732850	0.85027	0.83668	-1556.44	0.89965	0.65848	-1546.36	13732850	0.85027	0.85801	-2135.8	0.87016	0.83229	-2135.44	0.84453	0.86154	-2135.72	0.84453	0.88585	0.82808	-2135.02	B01172	13732850	0.85027	0.87194	0.67071	-3651.24	0.89931	0.66641	0.85795	-3650.08
20.1232	7.26105e-06	D01907.D01908	16750622	0.86096	0.86198	-2470.83	0.96612	0.65169	-2460.76	16750622	0.86096	0.89872	-3520.61	0.89475	0.91196	-3520.57	0.94211	0.88905	-3520.25	0.94211	0.87002	0.91778	-3520.02	D01907.D01908	16750622	0.86096	0.91926	0.65877	-5982.59	0.96589	0.65172	0.89873	-5981.38
20.1162	7.28768e-06	J01109	8045890	0.27807	0.36858	-911.195	0.20075	0.80936	-901.137	8045890	0.27807	0.35851	-1480.6	0.47599	0.09438	-1474.71	0.66785	0.27001	-1471.27	0.66785	0.34921	0.14654	-1470.01	J01109	8045890	0.27807	0.31117	0.76547	-2384.33	0.20088	0.80895	0.35809	-2381.74
20.1026	7.33968e-06	C00896	16259440	0.73797	0.6741	-2027.72	0.77317	0.46992	-2017.67	16259440	0.73797	0.69058	-3199.66	0.68715	0.70029	-3199.62	0.68719	0.69148	-3199.66	0.68679	0.68479	0.70029	-3199.62	C00896	16259440	0.73797	0.71332	0.49955	-5067.34	0.77382	0.47717	0.69038	-5064.89
20.0758	7.44326e-06	H00942	6933952	0.70053	0.36987	-228.786	0.14855	0.83788	-218.749	6933952	0.70053	0.25226	-466.782	0.18774	0.42162	-464.661	0.09039	0.30792	-462.542	0.09039	0.27189	0.37198	-462.273	H00942	6933952	0.70053	0.23001	0.79987	-686.569	0.14857	0.83816	0.25231	-685.53
20.072	7.45806e-06	N01531.N01532	13550274	0.86096	0.86188	-2020.94	0.92512	0.64241	-2010.9	13550274	0.86096	0.8437	-3064.31	0.84636	0.83872	-3064.3	0.7642	0.86215	-3062.61	0.76418	0.88572	0.82739	-3062.04	N01531.N01532	13550274	0.86096	0.87247	0.65182	-5078.54	0.92517	0.64244	0.8441	-5075.21
20.064	7.48933e-06	J00186	875826	0.59358	0.72902	-2497.3	0.64949	0.88221	-2487.26	875826	0.59358	0.67564	-3366.57	0.63867	0.7475	-3364.48	0.63105	0.69039	-3365.89	0.63104	0.64427	0.7463	-3364.46	J00186	875826	0.59358	0.66659	0.87806	-5811.15	0.64862	0.88111	0.67585	-5810.88
20.046	7.56015e-06	L00493	6325190	0.52941	0.52091	-654.646	0.36606	0.8277	-644.623	6325190	0.52941	0.43387	-1113.94	0.39472	0.51209	-1112.82	0.45781	0.42821	-1113.85	0.45781	0.35551	0.52811	-1111.95	L00493	6325190	0.52941	0.41669	0.80024	-1759.36	0.36662	0.82698	0.43374	-1758.56
20.043	7.57202e-06	L01156	21991680	0.93583	0.84828	-4148.96	0.78276	0.94107	-4138.94	21991680	0.93583	0.80025	-4159.85	0.74278	0.9019	-4153.11	0.86388	0.78253	-4157.87	0.86348	0.66861	0.91661	-4145.34	L01156	21991680	0.93583	0.79302	0.94891	-8144.4	0.77886	0.94968	0.79965	-8144.16
20.0346	7.60535e-06	J00495	2593923	0.85561	0.89729	-1420.93	0.94709	0.48156	-1410.91	2593923	0.85561	0.77581	-2285.89	0.81332	0.67078	-2284.25	0.83586	0.75346	-2284.9	0.83627	0.79835	0.67878	-2284.06	J00495	2593923	0.85561	0.84254	0.52701	-3708.22	0.94729	0.48159	0.7759	-3696.8
20.0256	7.64123e-06	K00250	1137440	0.76471	0.79815	-1231.82	0.70771	0.99773	-1221.8	1137440	0.76471	0.7736	-2307.26	0.8005	0.70747	-2306.32	0.78537	0.76868	-2307.21	0.78493	0.81553	0.70033	-2306.18	K00250	1137440	0.76471	0.75344	0.98977	-3530.27	0.70753	0.99748	0.77329	-3529.07
19.9862	7.80031e-06	D01748	14998831	0.60428	0.6874	-7523.81	0.77013	0.54775	-7513.82	14998831	0.60428	0.69941	-7519.75	0.70481	0.68456	-7519.65	0.66785	0.70865	-7519.37	0.66792	0.72878	0.6781	-7518.92	D01748	14998831	0.60428	0.72198	0.56297	-13317.4	0.7704	0.55523	0.69937	-13315.1
19.9752	7.84531e-06	J00953	5684580	0.57754	0.63785	-628.463	0.46468	1	-618.476	5684580	0.57754	0.69007	-1435.81	0.77246	0.50689	-1433.13	0.82029	0.66246	-1434.37	0.82029	0.74791	0.52164	-1432.87	J00953	5684580	0.57754	0.63448	0.99995	-2058.83	0.46461	0.99998	0.69006	-2054.28
19.9618	7.90049e-06	L01224	22395517	0.80214	0.83298	-1338.24	0.92807	0.52175	-1328.26	22395517	0.80214	0.82934	-1864.81	0.80851	0.86609	-1864.52	0.78334	0.84029	-1864.44	0.78333	0.82313	0.85889	-1864.37	L01224	22395517	0.80214	0.86117	0.54831	-3195.97	0.92793	0.52209	0.82881	-3193.07
19.9594	7.91041e-06	L00036.L00037	290905	0.17647	0.15151	-2797.68	0.07126	0.30671	-2787.7	290905	0.17647	0.10259	-4310.01	0.1087	0.07863	-4309.76	0.08962	0.10665	-4309.92	0.08962	0.12357	0.07326	-4309.44	L00036.L00037	290905	0.17647	0.09376	0.30173	-7098.26	0.07161	0.30658	0.10282	-7097.71
19.9302	8.03215e-06	L01137	21741579	0.8984	0.86079	-3316.24	0.93463	0.70615	-3306.27	21741579	0.8984	0.89382	-4451.56	0.88774	0.91123	-4451.36	0.91719	0.88558	-4451.15	0.91716	0.86457	0.91678	-4450.49	L01137	21741579	0.8984	0.90566	0.71735	-7759.01	0.93484	0.70585	0.8934	-7757.83
19.921	8.07089e-06	J00257.J00258.J00259	1219198	0.90909	0.62004	-706.854	0.7498	0.20086	-696.894	1219198	0.90909	0.74006	-1258.15	0.70441	0.81365	-1257.35	0.6121	0.7628	-1256.8	0.61209	0.7389	0.80126	-1256.57	J00257.J00258.J00259	1219198	0.90909	0.74306	0.20356	-1955.06	0.74947	0.20083	0.74035	-1955.04
19.9102	8.11661e-06	A00753.A00754	4254878	0.74332	0.74863	-2968.96	0.8346	0.57929	-2959	4254878	0.74332	0.8259	-3629.79	0.82858	0.81805	-3629.76	0.85474	0.81704	-3629.41	0.8549	0.8119	0.82335	-3629.39	A00753.A00754	4254878	0.74332	0.82956	0.57473	-6508.79	0.83709	0.57269	0.82589	-6508.73
19.9088	8.12256e-06	L00741	11533934	0.84492	0.69691	-1720.48	0.83144	0.37972	-1710.52	11533934	0.84492	0.68632	-2421.25	0.72916	0.59486	-2420.24	0.66298	0.6932	-2421.18	0.66289	0.77889	0.57456	-2419.44	L00741	11533934	0.84492	0.73218	0.40657	-4134.73	0.83129	0.38011	0.68642	-4131.78
19.8862	8.21915e-06	N02523.N02524	21962830	0.90909	0.89759	-1580.21	0.96495	0.69658	-1570.27	21962830	0.90909	0.92408	-2594.96	0.94811	0.86949	-2593.58	0.96187	0.91549	-2594.39	0.96193	0.94293	0.87193	-2593.49	N02523.N02524	21962830	0.90909	0.9378	0.70582	-4166.38	0.96513	0.69639	0.92421	-4165.22
19.8716	8.28216e-06	C01242	18154543	0.52941	0.64121	-1577.78	0.73245	0.31869	-1567.84	18154543	0.52941	0.56174	-2598.93	0.5617	0.56174	-2598.93	0.48679	0.58144	-2598.1	0.48678	0.60197	0.55329	-2597.92	C01242	18154543	0.52941	0.62146	0.33936	-4172.67	0.73222	0.31894	0.56173	-4166.77
19.8476	8.3868e-06	L00294	3950379	0.53476	0.39597	-1398.67	0.4757	0.18563	-1388.75	3950379	0.53476	0.34959	-1828.57	0.32925	0.39324	-1828.06	0.37307	0.34379	-1828.42	0.37309	0.30138	0.40608	-1827.34	L00294	3950379	0.53476	0.39251	0.20707	-3222.9	0.47569	0.18556	0.34962	-3217.32
19.8234	8.49365e-06	H01204	14224033	0.83422	0.58315	-1684.52	0.67624	0.38452	-1674.6	14224033	0.83422	0.65635	-2356.75	0.66448	0.6364	-2356.61	0.61719	0.6661	-2356.37	0.6172	0.69637	0.62656	-2355.81	H01204	14224033	0.83422	0.66256	0.39067	-3993.16	0.6758	0.38797	0.65637	-3993.04
19.8162	8.5257e-06	E01521	17900488	0.47059	0.57496	-1685.9	0.70209	0.30152	-1675.99	17900488	0.47059	0.69524	-2757.09	0.78592	0.4953	-2749.72	0.91011	0.62028	-2744.96	0.90997	0.68337	0.53365	-2743.62	E01521	17900488	0.47059	0.69758	0.30298	-4433.09	0.70186	0.30047	0.69522	-4433.08
19.8074	8.56504e-06	E01352	16785694	0.50802	0.56728	-1629.37	0.48594	0.76161	-1619.47	16785694	0.50802	0.57734	-2309.01	0.60472	0.52037	-2308.04	0.63718	0.56361	-2308.14	0.63717	0.5887	0.5261	-2307.72	E01352	16785694	0.50802	0.54599	0.74808	-3879.84	0.48427	0.76088	0.57691	-3876.82
19.7776	8.69963e-06	K01430	23920833	0.22995	0.69697	-1052.99	0.59959	0.99034	-1043.1	23920833	0.22995	0.56972	-1764.58	0.59136	0.52599	-1764.23	0.73137	0.52957	-1760.96	0.73176	0.51875	0.54524	-1760.92	K01430	23920833	0.22995	0.57997	0.99416	-2807.83	0.59908	0.99043	0.56983	-2807.68
19.771	8.72972e-06	L00328	4301445	0.36364	0.40719	-2206.95	0.32558	0.57479	-2197.06	4301445	0.36364	0.39995	-3080.65	0.39473	0.41517	-3080.57	0.41856	0.39467	-3080.54	0.41806	0.37712	0.42172	-3080.29	L00328	4301445	0.36364	0.37501	0.56325	-5243.51	0.32591	0.57141	0.39974	-5241.36
19.7672	8.74709e-06	C00755	15296151	0.39572	0.31957	-1962.7	0.21426	0.56167	-1952.82	15296151	0.39572	0.33165	-3366.57	0.30443	0.40559	-3365.64	0.27968	0.34783	-3365.88	0.28006	0.32054	0.3979	-3365.45	C00755	15296151	0.39572	0.29712	0.53679	-5322.96	0.21426	0.56129	0.33168	-5319.39
19.7612	8.7746e-06	L00074	511362	0.6631	0.63977	-2705.51	0.56718	0.78191	-2695.63	511362	0.6631	0.68163	-3193.03	0.6895	0.66326	-3192.84	0.69541	0.67847	-3192.96	0.69529	0.6895	0.66318	-3192.83	L00074	511362	0.6631	0.64455	0.77475	-5668.38	0.56939	0.78132	0.68163	-5662.66
19.7494	8.82894e-06	M00356	6083946	0.94652	0.86663	-1809.98	0.95265	0.57175	-1800.11	6083946	0.94652	0.88531	-2568.35	0.90929	0.83084	-2567.58	0.92121	0.88137	-2568.22	0.92099	0.90706	0.83157	-2567.56	M00356	6083946	0.94652	0.90496	0.58636	-4304.7	0.95241	0.5776	0.88532	-4303.38
19.7418	8.86412e-06	G01210	15884873	0.75936	0.79799	-2616.92	0.72632	0.99999	-2607.05	15884873	0.75936	0.78463	-3609.61	0.74514	0.87845	-3607.42	0.79805	0.7805	-3609.56	0.79766	0.71285	0.88903	-3606.48	G01210	15884873	0.75936	0.76473	0.99992	-6138.03	0.72636	0.99996	0.78461	-6136.93
19.7354	8.89385e-06	L00447	5990818	0.48663	0.44333	-1130.73	0.60232	0.1252	-1120.86	5990818	0.48663	0.45231	-2079.32	0.48687	0.38461	-2078.66	0.43352	0.45667	-2079.28	0.43352	0.51859	0.37175	-2078.23	L00447	5990818	0.48663	0.49295	0.17178	-3203.19	0.60138	0.12562	0.45234	-3200.18
19.7048	9.03741e-06	K00445	2173706	0.95187	0.694	-219.14	1	1e-05	-209.288	2173706	0.95187	0.58377	-332.87	0.66126	0.41804	-331.998	0.65098	0.57154	-332.716	0.65097	0.66659	0.41399	-331.993	K00445	2173706	0.95187	0.67306	0.25921	-550.57	0.99999	2e-05	0.58353	-542.158
19.6992	9.06393e-06	N02238	20121458	0.63102	0.56267	-3178.07	0.47171	0.71946	-3168.22	20121458	0.63102	0.55963	-4146.5	0.55094	0.58075	-4146.31	0.48721	0.58147	-4144.73	0.48774	0.58995	0.57074	-4144.68	N02238	20121458	0.63102	0.53411	0.70357	-6791.37	0.475	0.7124	0.55943	-6788.96
19.698	9.06962e-06	A00340	1717682	0.36364	0.46452	-902.417	0.58177	0.13063	-892.568	1717682	0.36364	0.37517	-1869.71	0.35797	0.41584	-1869.39	0.36654	0.37736	-1869.7	0.36649	0.35392	0.41737	-1869.38	A00340	1717682	0.36364	0.43292	0.19244	-2770.47	0.58144	0.13035	0.37505	-2762.28
19.6916	9.10005e-06	I00337	5905616	0.49733	0.60811	-3796.47	0.52844	0.80162	-3786.62	5905616	0.49733	0.54587	-4811.47	0.54852	0.53751	-4811.45	0.43095	0.57678	-4807.78	0.43095	0.61623	0.5118	-4806.57	I00337	5905616	0.49733	0.53986	0.80032	-8486.93	0.52809	0.80313	0.54586	-8486.82
19.684	9.13631e-06	A01023	7381507	0.4385	0.28968	-761.532	0.38008	0.06274	-751.69	7381507	0.4385	0.31032	-1137.02	0.30885	0.3136	-1137.02	0.2329	0.32854	-1135.94	0.23286	0.35315	0.2957	-1135.7	A01023	7381507	0.4385	0.3337	0.07116	-1889.89	0.38014	0.06258	0.31032	-1888.71
19.6682	9.21217e-06	N02131	19161047	0.41711	0.54472	-1164.56	0.46928	0.87636	-1154.72	19161047	0.41711	0.49622	-1863.88	0.40175	0.71006	-1854.74	0.4297	0.51071	-1863.19	0.4297	0.38943	0.71386	-1854.59	N02131	19161047	0.41711	0.48641	0.87134	-3018.8	0.46934	0.87623	0.49626	-3018.6
19.6654	9.22568e-06	L00476	6181380	0.6738	0.56126	-773.603	0.43473	0.80024	-763.771	6181380	0.6738	0.59995	-1372.83	0.60353	0.58875	-1372.8	0.67899	0.57897	-1371.34	0.67938	0.56542	0.60078	-1371.21	L00476	6181380	0.6738	0.55689	0.75402	-2142.72	0.43526	0.79962	0.59976	-2136.6
19.664	9.23244e-06	G00709	4943320	0.86631	0.91621	-854.289	0.98607	0.69798	-844.457	4943320	0.86631	0.96759	-1399.16	0.96027	0.98205	-1398.8	0.91833	0.98182	-1396.56	0.91833	0.98754	0.97434	-1396.41	G00709	4943320	0.86631	0.97221	0.70752	-2244.12	0.98572	0.69801	0.96759	-2243.61
19.6424	9.3374e-06	J00200	937670	0.73262	0.54225	-265.841	0.33082	1	-256.02	937670	0.73262	0.61387	-617.39	0.60587	0.6381	-617.341	0.84372	0.57682	-614.41	0.84372	0.49985	0.6994	-613.397	J00200	937670	0.73262	0.54776	0.99994	-878.866	0.3303	1	0.61342	-873.41
19.6292	9.40213e-06	B01088	12116125	0.72727	0.58995	-1575.97	0.67821	0.35597	-1566.16	12116125	0.72727	0.65106	-2348.2	0.6428	0.67439	-2348.04	0.63757	0.65403	-2348.16	0.63747	0.64048	0.67439	-2348.03	B01088	12116125	0.72727	0.6594	0.36105	-3914.61	0.67801	0.35611	0.65064	-3914.36
19.578	9.65749e-06	E01281	16082628	0.41711	0.64929	-422.563	0.75805	0.37402	-412.774	16082628	0.41711	0.67231	-632.585	0.70206	0.60216	-631.861	0.68751	0.66654	-632.52	0.68725	0.71904	0.59238	-631.759	E01281	16082628	0.41711	0.7002	0.40049	-1047.22	0.75788	0.3742	0.67228	-1045.36
19.5654	9.72139e-06	M00071	386106	0.41711	0.43726	-1257.34	0.33832	0.73755	-1247.56	386106	0.41711	0.42477	-2625.14	0.42	0.44327	-2625.06	0.45224	0.41592	-2624.91	0.45224	0.39335	0.45667	-2624.57	M00071	386106	0.41711	0.40084	0.7145	-3840.83	0.33841	0.74108	0.42471	-3838.78
19.553	9.7847e-06	N02944.N02945	24215504	0.61497	0.79783	-860.526	0.93965	0.2561	-850.749	24215504	0.61497	0.69796	-2417.89	0.79711	0.47781	-2411.61	0.84116	0.6685	-2415.82	0.84116	0.77854	0.48473	-2411.36	N02944.N02945	24215504	0.61497	0.7514	0.32869	-3275.48	0.9392	0.25706	0.6975	-3268.64
19.547	9.81548e-06	B01616.B01617	17547862	0.61497	0.61893	-891.76	0.52168	0.86426	-881.987	17547862	0.61497	0.58631	-1661.58	0.57819	0.60768	-1661.45	0.56893	0.59093	-1661.51	0.56898	0.57819	0.60768	-1661.44	B01616.B01617	17547862	0.61497	0.56736	0.85005	-2544.62	0.52167	0.86364	0.58646	-2543.57
19.54	9.85151e-06	I00633	11867835	0.52406	0.51789	-2399.02	0.60596	0.33858	-2389.25	11867835	0.52406	0.61696	-3053.76	0.62153	0.60556	-3053.72	0.59218	0.6231	-3053.61	0.59216	0.64228	0.59763	-3053.39	I00633	11867835	0.52406	0.61441	0.34814	-5328.03	0.60919	0.34814	0.61699	-5328
19.5282	9.91255e-06	K00084	397089	0.93048	0.88006	-3311.14	0.99998	0.64405	-3301.37	397089	0.93048	0.97889	-4176.19	0.9853	0.97133	-4176.16	0.99403	0.97635	-4176.16	0.99398	0.9822	0.97163	-4176.15	K00084	397089	0.93048	0.98915	0.6418	-7435.05	0.99996	0.6418	0.97876	-7434.87
19.5184	9.96353e-06	H01414	15968927	0.51872	0.69351	-651.975	0.82388	0.23422	-642.216	15968927	0.51872	0.80275	-816.687	0.81723	0.76739	-816.496	0.783	0.80773	-816.628	0.78266	0.83646	0.76042	-816.261	H01414	15968927	0.51872	0.8122	0.26576	-1350.05	0.83466	0.2536	0.80262	-1349.86
19.4954	1.00842e-05	M01034.M01035	16607787	0.73262	0.76621	-1924.99	0.83662	0.61658	-1915.24	16607787	0.73262	0.79575	-2618.3	0.78882	0.81533	-2618.09	0.81061	0.79169	-2618.2	0.80997	0.77097	0.82156	-2617.73	M01034.M01035	16607787	0.73262	0.80912	0.62258	-4534.58	0.83662	0.61643	0.79529	-4533.54
19.492	1.01022e-05	N00169	768738	0.78075	0.84363	-1796.12	0.78751	0.94668	-1786.37	768738	0.78075	0.8089	-2633.28	0.81153	0.80259	-2633.25	0.81134	0.80824	-2633.27	0.81134	0.81261	0.80252	-2633.24	N00169	768738	0.78075	0.80198	0.94506	-4419.93	0.78736	0.94639	0.80853	-4419.65
19.4854	1.01372e-05	A00233.A00234	1095908	0.90909	0.8649	-2710.14	0.92746	0.68192	-2700.4	1095908	0.90909	0.83094	-4010.47	0.83974	0.80744	-4010.17	0.75517	0.8491	-4008.39	0.75558	0.8858	0.79384	-4006.57	A00233.A00234	1095908	0.90909	0.86083	0.69945	-6612.7	0.92812	0.67587	0.83078	-6606.82
19.4792	1.01701e-05	J01374	15277229	0.38503	0.48014	-355.159	0.65533	0.10343	-345.419	15277229	0.38503	0.52116	-651.565	0.53843	0.48248	-651.387	0.47409	0.53139	-651.34	0.47417	0.57016	0.46929	-650.866	J01374	15277229	0.38503	0.55436	0.14833	-999.037	0.6545	0.10399	0.52098	-996.984
19.452	1.0316e-05	H01599.H01600	16917911	0.68449	0.58508	-548.479	0.70888	0.26665	-538.753	16917911	0.68449	0.6372	-1056.37	0.6611	0.58817	-1055.94	0.74898	0.60891	-1053.99	0.74933	0.60527	0.61565	-1053.98	H01599.H01600	16917911	0.68449	0.65691	0.28664	-1596.15	0.7088	0.26665	0.63719	-1595.12
19.4486	1.03344e-05	H01318.H01319.H01320	15456437	0.68984	0.72196	-1514.16	0.63744	0.86534	-1504.44	15456437	0.68984	0.74679	-2061.23	0.72958	0.78198	-2060.74	0.76878	0.7414	-2061.08	0.76789	0.70591	0.78968	-2060.12	H01318.H01319.H01320	15456437	0.68984	0.71162	0.85326	-3570.13	0.63692	0.86504	0.74684	-3565.67
19.4456	1.03506e-05	D01116	5530096	0.70053	0.59001	-1869.41	0.67012	0.41142	-1859.68	5530096	0.70053	0.64681	-2514.32	0.69549	0.54023	-2509.97	0.69346	0.63327	-2513.52	0.69343	0.69681	0.53964	-2509.97	D01116	5530096	0.70053	0.65446	0.41493	-4374.23	0.67013	0.41142	0.64665	-4374
19.4414	1.03734e-05	I00102	849855	0.12299	0.15058	-843.168	0	0.5946	-833.447	849855	0.12299	0	-1479.09	0	0	-1479.09	0	0	-1479.09	0	0	0	-1479.09	I00102	849855	0.12299	0	0.59451	-2312.54	0	0.59449	0	-2312.54
19.437	1.03973e-05	D02061	17770642	0.75936	0.79546	-3053.8	0.87761	0.60238	-3044.08	17770642	0.75936	0.79332	-3843.18	0.82155	0.7302	-3842.01	0.76689	0.80144	-3842.96	0.76693	0.86056	0.71631	-3840.67	D02061	17770642	0.75936	0.82284	0.62162	-6836.16	0.87614	0.60703	0.79326	-6833.36
19.4206	1.0487e-05	K01104	17145818	0.68984	0.82761	-1760.21	0.76036	0.97299	-1750.5	17145818	0.68984	0.80532	-2449.66	0.7707	0.87521	-2447.11	0.80625	0.80529	-2449.66	0.80654	0.74949	0.87979	-2446.51	K01104	17145818	0.68984	0.7908	0.96716	-4165.82	0.75959	0.97274	0.80539	-4164.85
19.4058	1.05686e-05	N00624	3242667	0.7754	0.82174	-1553.03	0.75046	0.97534	-1543.33	3242667	0.7754	0.76074	-2336.2	0.72027	0.83444	-2333.34	0.67039	0.78508	-2333.39	0.67038	0.75047	0.82749	-2332.32	N00624	3242667	0.7754	0.75762	0.97408	-3879.57	0.75067	0.97515	0.7609	-3879.53
19.3912	1.06497e-05	D01065	5294035	0.90909	0.92004	-653.909	0.99724	0.72199	-644.213	5294035	0.90909	0.92674	-1351.34	0.94492	0.88909	-1350.64	0.96622	0.91696	-1350.62	0.96622	0.93241	0.89515	-1350.37	D01065	5294035	0.90909	0.94603	0.74865	-1998.51	0.99716	0.72185	0.92671	-1995.56
19.372	1.07573e-05	C00645	14394006	0.53476	0.72738	-1077.91	0.83634	0.56204	-1068.23	14394006	0.53476	0.74726	-1347.48	0.77238	0.69753	-1346.77	0.76369	0.74211	-1347.38	0.76369	0.78028	0.6935	-1346.73	C00645	14394006	0.53476	0.77318	0.58474	-2418.5	0.83616	0.56203	0.74715	-2415.7
19.3604	1.08228e-05	B01407.B01408.B01409	16153662	0.38503	0.47562	-3691.88	0.39752	0.62201	-3682.2	16153662	0.38503	0.39329	-5036.13	0.40487	0.3661	-5035.75	0.40074	0.39096	-5036.11	0.40049	0.41106	0.36481	-5035.72	B01407.B01408.B01409	16153662	0.38503	0.39484	0.62217	-8682.18	0.39819	0.62188	0.39335	-8682.17
19.3378	1.09517e-05	H02150	21166867	0.86096	0.93597	-3380.13	0.9763	0.73146	-3370.46	21166867	0.86096	0.84062	-4645.68	0.84851	0.8204	-4645.5	0.88701	0.83141	-4645.12	0.88769	0.83696	0.82292	-4645.08	H02150	21166867	0.86096	0.887	0.73725	-7881.66	0.9762	0.72339	0.84103	-7870.63
19.3338	1.09746e-05	H01804	18088556	0.31551	0.29339	-1181.69	0.20476	0.47556	-1172.03	18088556	0.31551	0.23687	-1612.97	0.19929	0.31722	-1610.75	0.19379	0.24843	-1612.26	0.19379	0.20112	0.31547	-1610.73	H01804	18088556	0.31551	0.22695	0.46783	-2785.45	0.20483	0.47566	0.2368	-2784.99
19.3292	1.10011e-05	M00440	6815048	0.89305	0.85015	-5324.52	0.78644	0.98285	-5314.86	6815048	0.89305	0.89018	-6406.18	0.87964	0.92076	-6405.63	0.8807	0.89239	-6406.14	0.87964	0.87474	0.92132	-6405.62	M00440	6815048	0.89305	0.85655	0.97976	-11394.4	0.78783	0.98121	0.89019	-11389.5
19.31	1.11123e-05	K01082	16521433	0.51337	0.85085	-540.359	0.79068	1	-530.704	16521433	0.51337	0.81858	-1129.16	0.79408	0.86574	-1128.29	0.88106	0.80759	-1128.27	0.88106	0.76099	0.87466	-1126.42	K01082	16521433	0.51337	0.80921	1	-1660.16	0.79076	1	0.81883	-1659.86
19.2926	1.1214e-05	M01372.M01373	18113159	0.04813	0.09598	-3261.49	0.03923	0.2546	-3251.85	18113159	0.04813	0.03139	-4147.83	0.04243	0.00565	-4146.88	0.06704	0.02179	-4146.38	0.06703	0.02928	0.00954	-4146.14	M01372.M01373	18113159	0.04813	0.03383	0.25665	-7399.76	0.03909	0.25446	0.03134	-7399.67
19.2886	1.12375e-05	H01497	16353814	0.61497	0.64207	-1430.93	0.55745	0.8359	-1421.28	16353814	0.61497	0.70657	-2207.64	0.71347	0.68952	-2207.52	0.72437	0.70262	-2207.55	0.72458	0.71197	0.68952	-2207.49	H01497	16353814	0.61497	0.65952	0.81242	-3636.47	0.55721	0.83544	0.7067	-3628.93
19.2818	1.12776e-05	N02216	19955866	0.83422	0.7671	-1576.54	0.6838	0.96389	-1566.89	19955866	0.83422	0.79655	-2193.75	0.75424	0.88048	-2191.16	0.69984	0.82746	-2190.92	0.69984	0.79272	0.87122	-2190.1	N02216	19955866	0.83422	0.75824	0.94758	-3764.53	0.68357	0.96399	0.79679	-3760.64
19.2762	1.13108e-05	D01626	13167570	0.46524	0.56081	-684.817	0.43007	0.84679	-675.179	13167570	0.46524	0.53049	-999.033	0.47718	0.62786	-997.4	0.39556	0.55415	-996.912	0.39547	0.51642	0.60826	-996.429	D01626	13167570	0.46524	0.50176	0.81206	-1676.12	0.43083	0.84642	0.53049	-1674.21
19.2694	1.13511e-05	E00462	2547799	0.27807	0.24374	-1230.58	0.11976	0.567	-1220.94	2547799	0.27807	0.24022	-2097.52	0.20972	0.29852	-2096.96	0.21355	0.24631	-2097.44	0.21342	0.20797	0.2991	-2096.96	E00462	2547799	0.27807	0.20102	0.53825	-3321.01	0.11985	0.56591	0.24018	-3318.46
19.2684	1.13571e-05	I00753.I00754	12591521	0.96257	0.91444	-5324.2	0.96955	0.76096	-5314.57	12591521	0.96257	0.9327	-5100.4	0.94084	0.90223	-5100	0.92347	0.93499	-5100.36	0.92342	0.95639	0.89699	-5099.67	I00753.I00754	12591521	0.96257	0.94642	0.76318	-9900.69	0.96834	0.75759	0.93178	-9899.56
19.2616	1.13976e-05	F01450	12595316	0.21925	0.40594	-2178.96	0.31866	0.58659	-2169.33	12595316	0.21925	0.3674	-3105.65	0.33937	0.42339	-3104.61	0.33899	0.37532	-3105.41	0.33928	0.33892	0.42339	-3104.61	F01450	12595316	0.21925	0.35169	0.58163	-5201.36	0.31871	0.58759	0.36721	-5200.52
19.2542	1.14418e-05	F00339	1601079	0.72193	0.67209	-685.93	0.79157	0.40219	-676.303	1601079	0.72193	0.65016	-1538.13	0.62762	0.70735	-1537.5	0.51854	0.67995	-1534.94	0.51853	0.67644	0.68639	-1534.93	F00339	1601079	0.72193	0.68741	0.45392	-2219.28	0.79102	0.4024	0.64999	-2214.44
19.2438	1.15043e-05	A00628	3400250	0.95722	0.74819	-820.97	0.85916	0.41964	-811.348	3400250	0.95722	0.71599	-1303.9	0.73412	0.67012	-1303.61	0.7131	0.71615	-1303.9	0.7131	0.74558	0.66414	-1303.51	A00628	3400250	0.95722	0.75631	0.47921	-2079.53	0.8581	0.42926	0.71554	-2075.05
19.2378	1.15406e-05	H01633.H01634	17093904	0.91444	0.79177	-2411.59	0.86046	0.60797	-2401.98	17093904	0.91444	0.83372	-2896.88	0.83234	0.83888	-2896.87	0.84486	0.83095	-2896.83	0.84487	0.8249	0.84101	-2896.78	H01633.H01634	17093904	0.91444	0.84334	0.61855	-5223.46	0.86043	0.61687	0.8338	-5223.09
19.2222	1.16352e-05	H01307	15421637	0.73262	0.55761	-3001.4	0.6568	0.34637	-2991.79	15421637	0.73262	0.61074	-3487.12	0.5988	0.64057	-3486.89	0.59502	0.61409	-3487.08	0.59495	0.59356	0.64185	-3486.88	H01307	15421637	0.73262	0.62545	0.35237	-6479.48	0.6567	0.34637	0.61053	-6478.91
19.2198	1.16499e-05	J00514	2711390	0.61497	0.59141	-631.592	0.50139	0.85785	-621.982	2711390	0.61497	0.5708	-868.084	0.54922	0.62794	-867.603	0.5449	0.58037	-867.913	0.5449	0.55274	0.62643	-867.597	J00514	2711390	0.61497	0.54686	0.84687	-1491.21	0.50107	0.85758	0.57076	-1490.07
19.2094	1.17135e-05	M00892	15893565	0.54011	0.24004	-1030.87	0.12252	0.59317	-1021.26	15893565	0.54011	0.36512	-1559.49	0.33496	0.44161	-1558.82	0.29421	0.38422	-1558.87	0.29421	0.35669	0.43399	-1558.58	M00892	15893565	0.54011	0.28733	0.53939	-2589.84	0.12272	0.59296	0.36502	-2580.75
19.207	1.17283e-05	B00905	6077745	0.8877	0.72482	-1419.02	0.54479	0.99999	-1409.42	6077745	0.8877	0.74994	-1916.19	0.68719	0.8696	-1914.29	0.72541	0.75817	-1916.12	0.72577	0.65724	0.87532	-1914.08	B00905	6077745	0.8877	0.69148	0.9935	-3329.28	0.54474	0.99999	0.74965	-3325.61
19.2038	1.17479e-05	J01428	15899618	0.62567	0.73122	-695.673	0.63113	0.94238	-686.072	15899618	0.62567	0.75057	-988.138	0.76812	0.71242	-987.792	0.74021	0.75317	-988.115	0.7408	0.78575	0.70434	-987.54	J01428	15899618	0.62567	0.71304	0.91749	-1677.98	0.63113	0.94212	0.75059	-1674.21
19.1758	1.19215e-05	J00005	29539	0.93583	0.84828	-1362.01	0.96725	0.42948	-1352.42	29539	0.93583	1	-2461.61	1	0.96598	-2461.5	0.98527	1	-2461.6	0.98527	1	0.96599	-2461.49	J00005	29539	0.93583	0.99999	0.42069	-3814.27	0.96762	0.42937	0.99999	-3814.04
19.1624	1.20055e-05	H01020	7859148	0.91979	0.67561	-1916.42	0.81125	0.40478	-1906.84	7859148	0.91979	0.70463	-2880.8	0.75264	0.61077	-2879.53	0.63096	0.72468	-2880.15	0.6313	0.83067	0.58515	-2877.22	H01020	7859148	0.91979	0.73908	0.41418	-4750.04	0.8115	0.39806	0.70468	-4748.39
19.1484	1.20939e-05	D01152	5795019	0.4385	0.3879	-2977.75	0.46413	0.22063	-2968.18	5795019	0.4385	0.39233	-4056.09	0.39783	0.37878	-4056.01	0.35961	0.4026	-4055.69	0.35975	0.42601	0.37272	-4055.26	D01152	5795019	0.4385	0.4159	0.22594	-6941.77	0.4651	0.22016	0.39232	-6939.77
19.1448	1.21167e-05	H01914	18679033	0.25668	0.43324	-1428.05	0.30028	0.7985	-1418.48	18679033	0.25668	0.33604	-2111.42	0.28824	0.45459	-2110	0.28315	0.35059	-2111.11	0.28292	0.2895	0.45415	-2110	H01914	18679033	0.25668	0.32482	0.78998	-3496.92	0.3031	0.79802	0.33604	-3496.76
19.127	1.22302e-05	B01322.B01323	15361142	0.89305	0.79446	-3519.78	0.88023	0.63418	-3510.22	15361142	0.89305	0.8459	-4553.24	0.8624	0.81151	-4552.73	0.82687	0.84999	-4553.14	0.82669	0.87836	0.80738	-4552.27	B01322.B01323	15361142	0.89305	0.85634	0.63836	-7930.27	0.87912	0.63523	0.84577	-7929.76
19.107	1.23591e-05	G00758	5732683	0.70588	0.78516	-3894.95	0.87209	0.55799	-3885.39	5732683	0.70588	0.89737	-4158.24	0.90539	0.86843	-4157.97	0.88526	0.90158	-4158.18	0.88637	0.93505	0.85418	-4157.48	G00758	5732683	0.70588	0.88859	0.54375	-7815.56	0.87211	0.5494	0.89712	-7815.29
19.1056	1.23681e-05	H00896	6718856	0.5615	0.5059	-1383.36	0.42766	0.76047	-1373.81	6718856	0.5615	0.50662	-2233.47	0.45968	0.61416	-2230.28	0.42457	0.53624	-2230.86	0.42449	0.48855	0.60212	-2229.65	H00896	6718856	0.5615	0.48225	0.74367	-3609.34	0.42779	0.7602	0.50654	-3607.28
19.0918	1.24579e-05	D00330.D00331.D00332.D00333	1495029	0.91979	0.88572	-12672.9	0.93496	0.81584	-12663.3	1495029	0.91979	0.90109	-10558.6	0.92034	0.85985	-10556.4	0.92755	0.89223	-10557.8	0.92755	0.91587	0.86001	-10556.3	D00330.D00331.D00332.D00333	1495029	0.91979	0.91055	0.81677	-19406.3	0.9278	0.81516	0.90138	-19405.4
19.0866	1.24919e-05	F00334.F00335.F00336	1580410	0.29412	0.456	-1462.89	0.32813	0.74544	-1453.35	1580410	0.29412	0.2802	-2145.46	0.27094	0.30638	-2145.3	0.27897	0.28064	-2145.46	0.27864	0.25838	0.31207	-2145.25	F00334.F00335.F00336	1580410	0.29412	0.2943	0.75721	-3599.29	0.32814	0.7458	0.27996	-3598.81
19.0428	1.27819e-05	H01930	18770009	0.82888	0.81315	-1117.31	0.8853	0.53517	-1107.79	18770009	0.82888	0.80282	-1200	0.77699	0.86444	-1199.31	0.83998	0.79375	-1199.73	0.83961	0.74303	0.87825	-1198.41	H01930	18770009	0.82888	0.83537	0.54997	-2310.17	0.88477	0.53534	0.80287	-2307.78
19.0298	1.28693e-05	H02112	20611102	0.86631	0.82074	-2638.3	0.74846	0.9235	-2628.78	20611102	0.86631	0.81945	-3002.22	0.8137	0.83132	-3002.13	0.81663	0.82027	-3002.22	0.81656	0.80939	0.83237	-3002.11	H02112	20611102	0.86631	0.79693	0.91892	-5503.4	0.7504	0.9218	0.81951	-5501.24
19.014	1.29763e-05	M01102	16915792	0.19786	0.08613	-259.949	0.02947	0.26127	-250.442	16915792	0.19786	0.06616	-341.215	0.05313	0.09064	-340.766	0.06061	0.06703	-341.201	0.06069	0.04931	0.09206	-340.722	M01102	16915792	0.19786	0.05427	0.25058	-593.325	0.02942	0.26126	0.06615	-591.657
19.0122	1.29885e-05	K00572	2978107	0.54011	0.71316	-1463.29	0.62472	0.90176	-1453.78	2978107	0.54011	0.69368	-2438.45	0.69817	0.6805	-2438.39	0.7226	0.68543	-2438.18	0.7226	0.68501	0.68674	-2438.18	K00572	2978107	0.54011	0.67418	0.887	-3860.59	0.62651	0.89755	0.69374	-3859.19
18.9852	1.31736e-05	D00693	3392295	0.63102	0.61664	-1581.21	0.7474	0.38564	-1571.71	3392295	0.63102	0.66234	-2726.23	0.6937	0.60068	-2725.42	0.60461	0.67788	-2725.64	0.6046	0.75004	0.58284	-2723.59	D00693	3392295	0.63102	0.68623	0.40275	-4299.29	0.74733	0.38589	0.66234	-4297.94
18.978	1.32234e-05	D01196	6131993	0.5508	0.6697	-3107.22	0.74379	0.51999	-3097.73	6131993	0.5508	0.66455	-3859.44	0.69721	0.60033	-3857.32	0.6979	0.65598	-3859.04	0.6979	0.69698	0.60041	-3857.32	D01196	6131993	0.5508	0.69051	0.52618	-6929.94	0.74359	0.51816	0.66453	-6927
18.9658	1.33083e-05	N00178	820250	0.93583	0.60098	-449.624	0.93356	0	-440.141	820250	0.93583	0.73441	-818.681	0.77014	0.65097	-818.524	0.44705	0.80427	-816.664	0.44654	0.94	0.56969	-815.412	N00178	820250	0.93583	0.78652	0	-1259.83	0.9337	0	0.73513	-1258.82
18.951	1.34119e-05	E00358	1950901	0.30481	0.2182	-684.974	0.2975	0	-675.498	1950901	0.30481	0.23827	-1320.31	0.24647	0.21671	-1320.19	0.19332	0.24486	-1320.07	0.19356	0.26924	0.20772	-1319.75	E00358	1950901	0.30481	0.25701	0	-1996.63	0.29729	0	0.23825	-1995.81
18.8842	1.38898e-05	N00320	1527907	0.71123	0.49833	-1496.84	0.61184	0.29282	-1487.4	1527907	0.71123	0.58445	-2769.21	0.58976	0.56999	-2769.14	0.65568	0.56084	-2767.54	0.65568	0.54444	0.58362	-2767.38	N00320	1527907	0.71123	0.59142	0.29841	-4256.8	0.61052	0.2932	0.58438	-4256.61
18.8838	1.38927e-05	H01467	16202081	0.40107	0.14023	-1579.15	0.20248	0.01032	-1569.7	16202081	0.40107	0.24385	-2224.42	0.27595	0.17417	-2222.2	0.2312	0.24694	-2224.37	0.2312	0.30038	0.16965	-2221.37	H01467	16202081	0.40107	0.22965	0.00692	-3709.84	0.2032	0.01076	0.24328	-3709.08
18.8808	1.39146e-05	L01362.L01363	23151403	0.87166	0.83825	-3434.79	0.89493	0.64937	-3425.35	23151403	0.87166	0.84982	-3872.06	0.84647	0.85947	-3872.01	0.86432	0.84577	-3871.96	0.86557	0.83418	0.86288	-3871.8	L01362.L01363	23151403	0.87166	0.86584	0.6638	-7264.38	0.89453	0.65762	0.84938	-7263.07
18.8684	1.40054e-05	H01022	7919281	0.6738	0.79285	-2009.36	0.69238	0.97367	-1999.93	7919281	0.6738	0.75713	-2451.67	0.76587	0.73805	-2451.54	0.77606	0.75182	-2451.59	0.7765	0.76373	0.73853	-2451.52	H01022	7919281	0.6738	0.73831	0.96506	-4452.65	0.6918	0.97349	0.75726	-4451.6
18.8612	1.40583e-05	L01810	25470699	0.44385	0.31506	-292.133	0.19073	0.76966	-282.703	25470699	0.44385	0.26574	-636.059	0.25157	0.2937	-635.973	0.40263	0.24798	-634.922	0.40261	0.19878	0.32565	-634.255	L01810	25470699	0.44385	0.24326	0.7465	-919.673	0.19083	0.76899	0.26582	-918.762
18.8588	1.4076e-05	J00263	1245242	0.79679	0.6776	-2242.37	0.78025	0.42028	-2232.94	1245242	0.79679	0.72226	-2857.6	0.69331	0.78258	-2856.92	0.62112	0.74586	-2856.01	0.62109	0.73173	0.76658	-2855.93	J00263	1245242	0.79679	0.74129	0.43044	-5091.3	0.77937	0.42053	0.72204	-5090.54
18.8048	1.44802e-05	L01299.L01300	22802777	0.50267	0.51852	-2775.12	0.43776	0.69322	-2765.72	22802777	0.50267	0.5106	-3548.33	0.5033	0.52695	-3548.22	0.5297	0.50502	-3548.22	0.53008	0.4845	0.5314	-3547.92	L01299.L01300	22802777	0.50267	0.48568	0.69225	-6225.62	0.43598	0.70114	0.51034	-6223.67
18.804	1.44863e-05	E01092	13531960	0.92513	0.87924	-711.958	0.94832	0.40836	-702.556	13531960	0.92513	0.85724	-1221.14	0.78385	0.98076	-1217.77	0.50955	0.90465	-1211.64	0.50951	0.87699	0.94679	-1211.17	E01092	13531960	0.92513	0.89183	0.43785	-1926.2	0.94799	0.40856	0.8573	-1923.69
18.8016	1.45045e-05	E01814.E01815	24221969	0.75936	0.47509	-617.597	0.70286	0	-608.197	24221969	0.75936	0.54098	-960.781	0.44937	0.71241	-958.1	0.22419	0.60997	-953.381	0.2241	0.58004	0.65186	-953.227	E01814.E01815	24221969	0.75936	0.57893	0.0393	-1571.18	0.70272	1e-05	0.54082	-1568.98
18.8002	1.45152e-05	M01725	19807097	0.53476	0.6044	-628.463	0.42945	0.91034	-619.063	19807097	0.53476	0.49728	-1253.13	0.47205	0.55589	-1252.66	0.45045	0.51348	-1252.71	0.45045	0.48981	0.54866	-1252.55	M01725	19807097	0.53476	0.48159	0.88417	-1872.78	0.43083	0.90933	0.4971	-1872.2
18.7992	1.45228e-05	E01103.E01104	13617848	0.91979	0.89522	-1153.14	0.96299	0.45708	-1143.74	13617848	0.91979	0.86188	-1838.11	0.88706	0.8102	-1837.7	0.84114	0.86498	-1838.07	0.84111	0.90262	0.80398	-1837.49	E01103.E01104	13617848	0.91979	0.90313	0.47885	-2984.49	0.96245	0.45731	0.86155	-2981.85
18.7928	1.45716e-05	M00395	6427230	0.80214	0.72194	-2402.21	0.61395	0.94963	-2392.82	6427230	0.80214	0.67152	-3038.22	0.66985	0.67584	-3038.22	0.53753	0.71408	-3034.7	0.53815	0.75677	0.64691	-3033.86	M00395	6427230	0.80214	0.6524	0.94086	-5431.72	0.61288	0.94937	0.6713	-5431.04
18.7832	1.46452e-05	B01545	17072404	0.72193	0.79796	-833.193	0.71678	0.96371	-823.801	17072404	0.72193	0.74363	-1638.68	0.75021	0.7285	-1638.59	0.82973	0.72334	-1636.7	0.8299	0.70652	0.74245	-1636.55	B01545	17072404	0.72193	0.73496	0.96125	-2462.71	0.71699	0.96382	0.74349	-2462.48
18.7682	1.47608e-05	C01397.C01398	18805862	0.62032	0.61201	-2198.65	0.71232	0.38793	-2189.27	18805862	0.62032	0.59373	-3017.65	0.59713	0.5848	-3017.63	0.63564	0.58408	-3017.38	0.63558	0.58157	0.58864	-3017.37	C01397.C01398	18805862	0.62032	0.63312	0.4021	-5210.16	0.7123	0.38825	0.59363	-5206.92
18.7568	1.48493e-05	G00555	3709393	0.87166	0.91827	-3823.48	0.97334	0.81639	-3814.1	3709393	0.87166	0.94416	-4527.44	0.94896	0.93175	-4527.28	0.94774	0.94332	-4527.43	0.9479	0.95266	0.93065	-4527.26	G00555	3709393	0.87166	0.95351	0.81733	-8177.99	0.97327	0.81347	0.94416	-8176.98
18.7508	1.48961e-05	D01811	15646563	0.7861	0.65882	-3099.07	0.74832	0.48123	-3089.7	15646563	0.7861	0.68305	-4053.59	0.7012	0.6381	-4053.04	0.69789	0.67728	-4053.51	0.69764	0.70368	0.6372	-4053.04	D01811	15646563	0.7861	0.70349	0.48974	-7144.77	0.74861	0.48079	0.68241	-7143.29
18.7486	1.49133e-05	H00737	4888493	0.52941	0.5017	-599.443	0.41301	0.88467	-590.068	4888493	0.52941	0.44656	-1340.49	0.44656	0.44656	-1340.49	0.40772	0.4536	-1340.3	0.40837	0.4603	0.44042	-1340.27	H00737	4888493	0.52941	0.43631	0.87504	-1930.81	0.41286	0.8844	0.44676	-1930.55
18.7346	1.50232e-05	G00320	2012513	0.92513	0.44878	-209.311	0.684	0	-199.944	2012513	0.92513	0.64605	-564.419	0.66788	0.60123	-564.266	0.41949	0.68833	-561.213	0.41949	0.78132	0.54353	-559.526	G00320	2012513	0.92513	0.6561	0	-764.491	0.68398	0	0.64577	-764.363
18.7032	1.52726e-05	L01226	22398613	0.38503	0.21382	-2132.54	0.28785	0.05559	-2123.19	22398613	0.38503	0.36611	-3659.96	0.36457	0.37011	-3659.96	0.3947	0.35707	-3659.71	0.39428	0.34577	0.37402	-3659.6	L01226	22398613	0.38503	0.34049	0.04868	-5785.19	0.28853	0.05533	0.36571	-5783.15
18.6962	1.53288e-05	C00640	14320823	0.16578	0.36255	-776.906	0.49833	0.0345	-767.558	14320823	0.16578	0.43014	-1599.21	0.43176	0.42566	-1599.21	0.5491	0.39554	-1597.26	0.5491	0.34958	0.47304	-1596.7	C00640	14320823	0.16578	0.45031	0.05111	-2367.4	0.49797	0.03572	0.43057	-2366.77
18.6886	1.539e-05	M01664.M01665	19543434	0.96791	0.8039	-2907.51	0.8813	0.66658	-2898.16	19543434	0.96791	0.80355	-3813.38	0.79582	0.82412	-3813.14	0.76882	0.81342	-3812.82	0.76924	0.80768	0.81985	-3812.8	M01664.M01665	19543434	0.96791	0.82488	0.69867	-6550.62	0.88101	0.6722	0.80293	-6547.1
18.6762	1.54904e-05	I00533	10929209	0.94652	0.89151	-542.68	1	0.58598	-533.342	10929209	0.94652	0.88726	-1333.38	0.86717	0.92767	-1332.92	0.78691	0.89952	-1332.18	0.78628	0.88874	0.91842	-1332.09	I00533	10929209	0.94652	0.90883	0.62806	-1871.18	1	0.58602	0.88707	-1866.72
18.6696	1.55441e-05	G00682	4744105	0.68984	0.60777	-473.503	0.3566	1	-464.168	4744105	0.68984	0.61099	-848.223	0.63131	0.56938	-848.113	0.47238	0.62887	-847.583	0.47238	0.67766	0.54479	-847.139	G00682	4744105	0.68984	0.55733	0.99999	-1315.94	0.35609	0.99999	0.61106	-1312.39
18.6622	1.56046e-05	J01171	9656760	0.95187	0.9112	-2004.86	0.96609	0.72087	-1995.53	9656760	0.95187	0.86418	-2852.26	0.85461	0.89033	-2852.04	0.80543	0.87859	-2851.38	0.80568	0.87536	0.88253	-2851.38	J01171	9656760	0.95187	0.90468	0.7337	-4799.98	0.96608	0.71669	0.8641	-4794.1
18.6618	1.56078e-05	C00665	14612880	0.91979	0.80008	-1651.89	0.8859	0.44363	-1642.56	14612880	0.91979	0.81592	-2266.93	0.82559	0.78451	-2266.72	0.75004	0.83095	-2266.2	0.75034	0.86925	0.76761	-2265.32	C00665	14612880	0.91979	0.83849	0.46155	-3910.89	0.88597	0.4427	0.8148	-3909.5
18.6318	1.58554e-05	D00308	1398887	0.63636	0.72837	-2210.69	0.64793	0.90324	-2201.38	1398887	0.63636	0.72612	-2704.95	0.71836	0.74765	-2704.79	0.74797	0.7209	-2704.83	0.74752	0.69845	0.75375	-2704.47	D00308	1398887	0.63636	0.70095	0.89354	-4816.94	0.64838	0.90001	0.72612	-4814.99
18.6074	1.60596e-05	M01143	17142710	0.86631	0.68936	-263.983	0.77869	0.15515	-254.68	17142710	0.86631	0.74938	-588.955	0.77236	0.69247	-588.584	0.66986	0.76499	-588.295	0.66985	0.81814	0.6676	-587.161	M01143	17142710	0.86631	0.76001	0.16628	-843.816	0.7781	0.15553	0.74906	-843.635
18.5984	1.61356e-05	C00660	14568474	0.52941	0.81324	-422.736	1	0.1727	-413.437	14568474	0.52941	0.622	-914.013	0.64733	0.56231	-913.862	0.71355	0.59286	-913.441	0.71355	0.59195	0.59516	-913.44	C00660	14568474	0.52941	0.72745	0.39038	-1338.27	0.99998	0.17225	0.62209	-1327.45
18.5812	1.62818e-05	D01544	10042111	0.59358	0.64328	-1291.61	0.54536	0.88031	-1282.32	10042111	0.59358	0.7177	-2257.97	0.69995	0.75571	-2257.54	0.69478	0.72515	-2257.81	0.69478	0.70392	0.75455	-2257.53	D01544	10042111	0.59358	0.66807	0.85059	-3547.73	0.54482	0.88072	0.71792	-3540.29
18.566	1.64122e-05	M01207.M01208	17442005	0.91444	0.8746	-3761.24	0.82479	0.9497	-3751.96	17442005	0.91444	0.91515	-3978.93	0.92674	0.89431	-3978.24	0.91597	0.91496	-3978.93	0.91596	0.93431	0.89254	-3978.04	M01207.M01208	17442005	0.91444	0.8854	0.95084	-7503.17	0.8267	0.95398	0.91521	-7495.25
18.562	1.64467e-05	A00979	6526915	0.85561	0.9179	-2304.36	0.86572	0.99042	-2295.08	6526915	0.85561	0.95536	-3280.4	0.93976	0.98306	-3278.9	0.94717	0.95723	-3280.34	0.94697	0.93646	0.98343	-3278.84	A00979	6526915	0.85561	0.92849	0.99008	-5548.84	0.86756	0.99082	0.95534	-5542.04
18.5512	1.65401e-05	G00620.G00621	4113674	0.29412	0.29667	-2734.87	0.37442	0.13192	-2725.6	4113674	0.29412	0.32374	-3159.58	0.31576	0.34332	-3159.42	0.32358	0.32432	-3159.58	0.32333	0.30788	0.34589	-3159.38	G00620.G00621	4113674	0.29412	0.34127	0.13835	-5886.09	0.37383	0.13191	0.32418	-5885.18
18.5402	1.66358e-05	N02614	22492061	0.24599	0.20098	-1157.84	0.28724	0.00182	-1148.57	22492061	0.24599	0.21815	-2017.1	0.22618	0.19438	-2016.93	0.19814	0.222	-2017.02	0.19766	0.24599	0.18464	-2016.65	N02614	22492061	0.24599	0.2388	0.01189	-3167.09	0.28738	0.00159	0.21809	-3165.67
18.5264	1.67567e-05	L00030	245484	0.88235	0.63064	-1034.96	0.74409	0.31876	-1025.7	245484	0.88235	0.70649	-1862.4	0.72553	0.66494	-1862.11	0.61819	0.72284	-1861.46	0.61821	0.76937	0.64649	-1860.41	L00030	245484	0.88235	0.71748	0.3276	-2888.39	0.74307	0.31925	0.70639	-2888.1
18.5236	1.67813e-05	K00383.K00384	1808225	0.81818	0.85766	-3994.36	0.80364	0.94645	-3985.1	1808225	0.81818	0.82242	-4647.54	0.80917	0.8475	-4647	0.79834	0.82902	-4647.19	0.79797	0.81505	0.84702	-4646.92	K00383.K00384	1808225	0.81818	0.81641	0.94471	-8488.38	0.80346	0.94545	0.8224	-8488.14
18.52	1.68131e-05	M00404	6520635	0.47059	0.74414	-1297.75	0.67517	0.93004	-1288.49	6520635	0.47059	0.67004	-3248.69	0.62091	0.7771	-3244.89	0.65596	0.6744	-3248.63	0.65584	0.60073	0.78181	-3244.46	M00404	6520635	0.47059	0.67172	0.9291	-4537.18	0.67527	0.93003	0.67003	-4537.17
18.5134	1.68714e-05	F00261	1243920	0.73262	0.86213	-613.006	0.78743	1	-603.75	1243920	0.73262	0.78316	-868.202	0.73682	0.88118	-866.359	0.78726	0.78198	-868.197	0.78722	0.69816	0.90136	-865.535	F00261	1243920	0.73262	0.78448	1	-1471.96	0.78747	1	0.78316	-1471.95
18.509	1.69104e-05	F01066	5159076	0.6631	0.58654	-695.615	0.40473	0.98662	-686.36	5159076	0.6631	0.51769	-1228.72	0.55395	0.44001	-1228.03	0.66081	0.4854	-1226.62	0.66083	0.49898	0.46568	-1226.57	F01066	5159076	0.6631	0.49093	0.93829	-1916.52	0.40489	0.98672	0.51781	-1915.08
18.5064	1.69335e-05	C01279.C01280	18289237	0.34225	0.54066	-915.098	0.41753	0.95077	-905.845	18289237	0.34225	0.49118	-1793.45	0.49118	0.49294	-1793.45	0.50416	0.48656	-1793.41	0.50418	0.48183	0.49597	-1793.4	C01279.C01280	18289237	0.34225	0.47333	0.92647	-2700.15	0.41762	0.95147	0.49139	-2699.3
18.4916	1.70655e-05	J01167	9633208	0.3262	0.36113	-992.941	0.49289	0.09963	-983.695	9633208	0.3262	0.52959	-1769.13	0.57727	0.44337	-1768.05	0.69599	0.50112	-1766.74	0.69674	0.52693	0.46723	-1766.58	J01167	9633208	0.3262	0.51841	0.09364	-2753.03	0.49413	0.09954	0.52987	-2752.82
18.4878	1.70995e-05	M00042	234026	0.78075	0.46281	-841.882	0.34871	0.75903	-832.638	234026	0.78075	0.53076	-1405.63	0.50311	0.58836	-1405.06	0.52104	0.53295	-1405.62	0.52113	0.49344	0.59191	-1405	M00042	234026	0.78075	0.47479	0.71922	-2244.22	0.34886	0.75783	0.5306	-2238.27
18.4644	1.73108e-05	L01996.L01997	26386651	0.72193	0.62011	-2706.8	0.70348	0.42337	-2697.57	26386651	0.72193	0.66732	-3932.93	0.66457	0.676	-3932.91	0.6851	0.66091	-3932.8	0.68528	0.64772	0.68241	-3932.65	L01996.L01997	26386651	0.72193	0.67907	0.41967	-6551.39	0.70503	0.4127	0.66719	-6550.86
18.4546	1.74e-05	F00782	3757327	0.51872	0.47542	-914.986	0.58849	0.11934	-905.759	3757327	0.51872	0.48147	-1248.04	0.4885	0.46045	-1247.97	0.4496	0.48862	-1247.92	0.44891	0.51703	0.44639	-1247.68	F00782	3757327	0.51872	0.51641	0.15218	-2155.87	0.58828	0.11896	0.48142	-2153.8
18.4534	1.7411e-05	N02492	21764114	0.78075	0.76645	-1393.78	0.90051	0.49635	-1384.56	21764114	0.78075	0.76672	-1886.78	0.73471	0.82375	-1886.25	0.69032	0.78462	-1886.07	0.69002	0.76134	0.81275	-1885.95	N02492	21764114	0.78075	0.80669	0.52565	-3274.34	0.89997	0.49665	0.76665	-3271.34
18.4448	1.74897e-05	E01411	17195269	0.70588	0.6747	-3796.56	0.74053	0.54617	-3787.34	17195269	0.70588	0.70936	-4374.49	0.71108	0.7049	-4374.48	0.66881	0.7215	-4373.72	0.669	0.73608	0.6997	-4373.42	E01411	17195269	0.70588	0.7201	0.54544	-8130.96	0.74049	0.5437	0.70932	-8130.42
18.442	1.75155e-05	J01392	15521744	0.41711	0.38473	-2924.28	0.28118	0.57232	-2915.06	15521744	0.41711	0.32844	-3535.64	0.28491	0.42302	-3533.78	0.29114	0.34105	-3535.3	0.29118	0.27936	0.42499	-3533.76	J01392	15521744	0.41711	0.3132	0.56655	-6415.24	0.28231	0.57165	0.32835	-6414.73
18.4366	1.75652e-05	N02239	20136254	0.70588	0.65746	-5785.38	0.55481	0.81452	-5776.16	20136254	0.70588	0.61325	-6445.35	0.59964	0.6517	-6444.98	0.5313	0.63545	-6444.03	0.5313	0.63048	0.645	-6444	N02239	20136254	0.70588	0.59559	0.82014	-11610.7	0.55894	0.82345	0.61351	-11610
18.4338	1.7591e-05	G00422	2743223	0.20321	0.11895	-654.012	0.03474	0.42126	-644.795	2743223	0.20321	0.16321	-928.618	0.14682	0.20182	-928.383	0.11668	0.16956	-928.369	0.11635	0.15566	0.1958	-928.261	G00422	2743223	0.20321	0.12464	0.3739	-1579.01	0.03475	0.4216	0.16322	-1573.41
18.4308	1.76187e-05	J00465.J00466	2248317	0.53476	0.29953	-1144.94	0.42278	0.05678	-1135.73	2248317	0.53476	0.37713	-2212.52	0.42932	0.27035	-2210.66	0.22259	0.42019	-2208.9	0.22235	0.55604	0.23659	-2203.07	J00465.J00466	2248317	0.53476	0.3905	0.06303	-3348.55	0.42141	0.05695	0.37709	-3348.24
18.4266	1.76576e-05	C00912	16345204	0.75401	0.72914	-2549.7	0.66201	0.85398	-2540.49	16345204	0.75401	0.70603	-3431.36	0.69821	0.72653	-3431.14	0.70668	0.70603	-3431.36	0.70694	0.6876	0.72958	-3431.05	C00912	16345204	0.75401	0.69204	0.84948	-5972.84	0.66167	0.8538	0.70625	-5971.85
18.424	1.76817e-05	C00523	13093993	0.25668	0.34595	-1760.06	0.4465	0.16491	-1750.85	13093993	0.25668	0.38091	-2415.41	0.37688	0.39115	-2415.38	0.50352	0.35447	-2412.58	0.50355	0.31576	0.40913	-2411.58	C00523	13093993	0.25668	0.40118	0.17663	-4167.4	0.44635	0.16559	0.38098	-4166.26
18.4038	1.78701e-05	A00913	5601937	0.64706	0.67785	-1363.64	0.55886	0.8412	-1354.43	5601937	0.64706	0.63913	-2446.82	0.56797	0.77476	-2442.83	0.60262	0.64839	-2446.57	0.60251	0.54756	0.78278	-2442.57	A00913	5601937	0.64706	0.61663	0.83595	-3765.06	0.55967	0.84466	0.63913	-3763.77
18.3866	1.80322e-05	D00295	1342159	0.35829	0.38964	-2868.7	0.48181	0.19594	-2859.51	1342159	0.35829	0.46309	-3736.68	0.46569	0.45551	-3736.66	0.49266	0.45518	-3736.51	0.49266	0.4529	0.45953	-3736.5	D00295	1342159	0.35829	0.4689	0.18926	-6523.9	0.48062	0.18926	0.46303	-6523.83
18.3852	1.80454e-05	B00725	4028924	0.91444	0.73202	-1262.38	0.85521	0.36226	-1253.19	4028924	0.91444	0.73313	-2002.39	0.82984	0.51703	-1997.06	0.73909	0.73148	-2002.38	0.73997	0.87807	0.49524	-1995.79	B00725	4028924	0.91444	0.77063	0.39876	-3257.88	0.85494	0.3624	0.73318	-3255.58
18.3688	1.82014e-05	B01019	9091208	0.98396	0.84476	-430.202	0.96357	0.31433	-421.018	9091208	0.98396	0.92045	-1167.46	0.92045	0.91744	-1167.46	0.87969	0.92668	-1167.34	0.87969	0.93819	0.90672	-1167.3	B01019	9091208	0.98396	0.933	0.32549	-1588.73	0.96294	0.31458	0.92004	-1588.48
18.368	1.82091e-05	D01299	7272293	0.94118	0.89746	-5871.38	0.93516	0.73587	-5862.2	7272293	0.94118	0.89003	-5425.21	0.88241	0.91178	-5425	0.88245	0.89138	-5425.2	0.88241	0.87716	0.91347	-5424.99	D01299	7272293	0.94118	0.91141	0.7302	-10909.8	0.93701	0.72853	0.88941	-10908
18.3628	1.82588e-05	H02428.H02429	24177356	0.5615	0.55541	-2439.07	0.47987	0.70224	-2429.89	24177356	0.5615	0.46212	-3299.7	0.48527	0.41581	-3298.72	0.49395	0.45337	-3299.35	0.49395	0.48028	0.41686	-3298.69	H02428.H02429	24177356	0.5615	0.46813	0.70356	-5729.72	0.47989	0.70181	0.46223	-5729.59
18.357	1.83145e-05	N01736.N01737	14902746	0.23529	0.30835	-2097.55	0.21429	0.5262	-2088.37	14902746	0.23529	0.24801	-2784.19	0.28675	0.1682	-2782.55	0.32141	0.23181	-2783.21	0.32141	0.26987	0.17348	-2782.3	N01736.N01737	14902746	0.23529	0.23758	0.51632	-4819.19	0.21573	0.5216	0.24815	-4818.89
18.3536	1.83472e-05	B00171	694204	0.91979	0.74133	-2851.16	0.87638	0.49017	-2841.99	694204	0.91979	0.82484	-3483.01	0.83328	0.79395	-3482.89	0.76318	0.84447	-3482.41	0.76319	0.87775	0.77838	-3481.83	B00171	694204	0.91979	0.84174	0.5057	-6281.85	0.8767	0.4994	0.82495	-6281.36
18.3486	1.83954e-05	D01472	8811456	0.88235	0.78983	-3187.68	0.86125	0.62537	-3178.5	8811456	0.88235	0.82679	-3651.66	0.80974	0.86147	-3651.16	0.66304	0.86179	-3645.41	0.66306	0.87298	0.84443	-3645.27	D01472	8811456	0.88235	0.83892	0.62444	-6776.8	0.86116	0.62201	0.82643	-6776.24
18.3298	1.85778e-05	M01773.M01774	20103150	0.6631	0.55315	-1882.89	0.64855	0.35727	-1873.73	20103150	0.6631	0.65768	-2893.22	0.68512	0.58988	-2892.23	0.67665	0.65092	-2893.11	0.67635	0.69218	0.58724	-2892.19	M01773.M01774	20103150	0.6631	0.65486	0.35638	-4766.97	0.64872	0.35638	0.65772	-4766.94
18.3218	1.8656e-05	E00176.E00177.E00178	965063	0.80749	0.77699	-3542.18	0.70629	0.8853	-3533.02	965063	0.80749	0.77233	-3709.44	0.76523	0.7878	-3709.3	0.75646	0.77617	-3709.35	0.75616	0.76642	0.7878	-3709.27	E00176.E00177.E00178	965063	0.80749	0.74963	0.88272	-6911.79	0.7039	0.88571	0.77149	-6909.71
18.3106	1.8766e-05	F00144.F00145	664803	0.79144	0.84089	-3752.69	0.76604	0.94198	-3743.53	664803	0.79144	0.82654	-5011.25	0.81596	0.85232	-5010.85	0.7672	0.8437	-5009.54	0.76757	0.84483	0.84206	-5009.54	F00144.F00145	664803	0.79144	0.80827	0.93407	-8473.31	0.76689	0.94111	0.82651	-8471.6
18.2954	1.89163e-05	C01051	17149471	0.6631	0.76482	-558.361	0.89717	0.44681	-549.214	17149471	0.6631	0.79075	-1390.8	0.78515	0.8057	-1390.72	0.74907	0.79792	-1390.49	0.74909	0.79439	0.803	-1390.48	C01051	17149471	0.6631	0.81165	0.50323	-1942.87	0.89727	0.44757	0.79057	-1940.01
18.293	1.89402e-05	J00875.J00876	5256534	0.88235	0.90446	-1530.79	0.85426	0.99999	-1521.65	5256534	0.88235	0.92732	-1922.85	0.90848	0.96169	-1921.31	0.87002	0.94101	-1920.59	0.87002	0.92845	0.95773	-1920.17	J00875.J00876	5256534	0.88235	0.90381	0.99676	-3448.72	0.85442	0.99997	0.92715	-3444.5
18.292	1.89501e-05	H01370	15768041	0.48128	0.94361	-261.646	1	0.70331	-252.5	15768041	0.48128	0.89461	-387.649	0.87511	0.94263	-387.296	0.90712	0.89177	-387.61	0.90712	0.85404	0.96208	-386.99	H01370	15768041	0.48128	0.9313	0.74944	-647.88	1	0.70323	0.89462	-640.149
18.2892	1.8978e-05	J00685	3976299	0.71123	0.49242	-753.208	0.61834	0.16713	-744.063	3976299	0.71123	0.62399	-1533.43	0.68623	0.47768	-1530.85	0.69766	0.59959	-1532.47	0.69795	0.67915	0.48192	-1530.82	J00685	3976299	0.71123	0.62212	0.16591	-2277.5	0.61835	0.1675	0.62375	-2277.5
18.283	1.90399e-05	M01878	20545315	0.87701	0.6982	-889.381	0.59564	0.93587	-880.239	20545315	0.87701	0.84219	-1370.31	0.82958	0.86611	-1370.13	0.82093	0.84671	-1370.22	0.8215	0.83311	0.86544	-1370.12	M01878	20545315	0.87701	0.76443	0.91077	-2263.58	0.59514	0.93567	0.8421	-2250.54
18.2606	1.92651e-05	M00813	15410713	0.78075	0.85314	-1878.3	0.79507	0.96133	-1869.17	15410713	0.78075	0.82087	-2644.7	0.82331	0.81253	-2644.67	0.82899	0.81807	-2644.65	0.82876	0.82126	0.81395	-2644.65	M00813	15410713	0.78075	0.81234	0.95811	-4475.1	0.79519	0.96031	0.82071	-4474.71
18.255	1.93218e-05	J00145.J00146.J00147	662067	0.73797	0.69618	-6974.46	0.76536	0.57708	-6965.34	662067	0.73797	0.68666	-6643.35	0.69429	0.66638	-6643.15	0.68095	0.68801	-6643.34	0.68107	0.70436	0.66389	-6643.03	J00145.J00146.J00147	662067	0.73797	0.71281	0.57396	-12778	0.7622	0.56906	0.68646	-12774.9
18.2538	1.9334e-05	J01014	6377954	0.65241	0.67646	-1021.69	0.57747	0.94672	-1012.57	6377954	0.65241	0.61225	-1812.3	0.60592	0.62917	-1812.25	0.69127	0.5979	-1811.7	0.69126	0.56471	0.64711	-1811.33	J01014	6377954	0.65241	0.60024	0.94146	-2825.08	0.57821	0.94611	0.6123	-2824.87
18.2484	1.93889e-05	I01005	14089821	0.11765	0.66363	-161.001	0.43643	1	-151.877	14089821	0.11765	0.31641	-347.429	0.31544	0.32018	-347.428	0.68001	0.21599	-342.357	0.67967	0.06882	0.44168	-340.923	I01005	14089821	0.11765	0.34663	1	-499.786	0.43626	1	0.31644	-499.306
18.2432	1.94419e-05	D00013.D00014.D00015.D00016.D00017	93515	0.94652	0.79528	-5093.66	0.85825	0.6395	-5084.54	93515	0.94652	0.8425	-5212.53	0.85253	0.81378	-5212.12	0.8351	0.8443	-5212.51	0.8351	0.86489	0.81128	-5211.91	D00013.D00014.D00015.D00016.D00017	93515	0.94652	0.84746	0.63189	-10018.3	0.85759	0.63095	0.84241	-10018.1
18.2258	1.96203e-05	H00787	5769865	0.34759	0.33015	-752.023	0.19556	0.63727	-742.91	5769865	0.34759	0.34246	-1077	0.33864	0.35617	-1076.98	0.34791	0.34112	-1077	0.34797	0.32823	0.36429	-1076.95	H00787	5769865	0.34759	0.29654	0.5939	-1823.47	0.19563	0.63701	0.34248	-1819.91
18.225	1.96285e-05	J00007	52910	0.39037	0.4968	-736.822	0.37163	0.84342	-727.709	52910	0.39037	0.45958	-1120.17	0.43396	0.5092	-1119.82	0.45749	0.46034	-1120.17	0.45749	0.4226	0.51438	-1119.74	J00007	52910	0.39037	0.43335	0.81819	-1849.1	0.37172	0.84303	0.45988	-1847.88
18.2206	1.96739e-05	E01251	15583312	0.65775	0.64638	-930.388	0.54622	0.83172	-921.278	15583312	0.65775	0.5597	-1622.7	0.52611	0.62344	-1621.72	0.53138	0.56577	-1622.54	0.53141	0.52272	0.62455	-1621.71	E01251	15583312	0.65775	0.55566	0.82895	-2544.03	0.54662	0.83123	0.55962	-2543.98
18.2052	1.98337e-05	A00504.A00505	2619869	0.76471	0.83332	-2328.5	0.90876	0.70042	-2319.4	2619869	0.76471	0.81564	-2734.48	0.82359	0.79238	-2734.24	0.80876	0.81749	-2734.46	0.80823	0.8391	0.7868	-2734.04	A00504.A00505	2619869	0.76471	0.8446	0.72224	-4777.09	0.90822	0.70604	0.81571	-4772.49
18.1928	1.99632e-05	H00216	1198964	0.93583	0.84486	-4036.42	0.92184	0.71182	-4027.32	1198964	0.93583	0.83355	-5521.65	0.87807	0.76149	-5518.71	0.82353	0.83592	-5521.62	0.82349	0.90818	0.7547	-5517.39	H00216	1198964	0.93583	0.86155	0.71857	-9340.79	0.92162	0.71084	0.833	-9337.19
18.1808	2.00894e-05	E00131	746665	0.85561	0.94057	-2119.38	0.99998	0.82635	-2110.29	746665	0.85561	0.94545	-2546	0.9477	0.94034	-2545.98	0.96487	0.93972	-2545.68	0.96491	0.93611	0.94393	-2545.66	E00131	746665	0.85561	0.96079	0.8373	-4659.67	1	0.82575	0.94553	-4656.29
18.1782	2.01168e-05	C00779	15454868	0.58289	0.52381	-852.193	0.42144	0.75857	-843.104	15454868	0.58289	0.43325	-1592.29	0.40968	0.48089	-1591.82	0.53171	0.40499	-1589.65	0.53171	0.29841	0.54393	-1585.59	C00779	15454868	0.58289	0.43004	0.75477	-2435.43	0.42215	0.75809	0.4334	-2435.39
18.167	2.02355e-05	J00127	562709	0.95722	0.96124	-2462.62	0.99369	0.86215	-2453.53	562709	0.95722	0.93813	-3214.73	0.92669	0.96212	-3214	0.94639	0.93552	-3214.65	0.94623	0.91503	0.964	-3213.56	J00127	562709	0.95722	0.95742	0.86604	-5634.44	0.99368	0.86089	0.93783	-5628.12
18.161	2.02993e-05	B00165.B00166	663581	0.25668	0.30983	-1483.5	0.4079	0.09775	-1474.42	663581	0.25668	0.30844	-2404.65	0.33143	0.26749	-2404.15	0.23216	0.32517	-2403.59	0.23238	0.38292	0.25317	-2401.95	B00165.B00166	663581	0.25668	0.34002	0.11351	-3881.55	0.40807	0.09743	0.3083	-3879.08
18.16	2.031e-05	N02489.N02490	21757108	0.91444	0.83069	-3862.69	0.94288	0.64523	-3853.61	21757108	0.91444	0.78579	-4076.62	0.75762	0.84373	-4075.95	0.72201	0.8056	-4075.78	0.72205	0.78149	0.83544	-4075.61	N02489.N02490	21757108	0.91444	0.83456	0.65655	-7814.92	0.94083	0.63595	0.78562	-7809.5
18.1348	2.05806e-05	L00262	3460692	0.71123	0.7097	-4321.72	0.63628	0.8478	-4312.65	3460692	0.71123	0.7025	-4516.69	0.68163	0.74788	-4515.92	0.69524	0.70451	-4516.68	0.69524	0.67258	0.75051	-4515.83	L00262	3460692	0.71123	0.68045	0.84048	-8660.83	0.63747	0.84478	0.70225	-8659.18
18.1346	2.05827e-05	E00344	1872594	0.3369	0.36738	-1005.49	0.55712	0.0021	-996.421	1872594	0.3369	0.35996	-1601.22	0.35595	0.37348	-1601.21	0.35638	0.36143	-1601.22	0.35595	0.35128	0.37593	-1601.2	E00344	1872594	0.3369	0.41147	0.06231	-2601.28	0.5566	0.0017	0.36039	-2597.64
18.1246	2.06911e-05	J00236	1132005	0.85027	0.7623	-1509.03	0.83843	0.57364	-1499.97	1132005	0.85027	0.81121	-2113.19	0.83502	0.75922	-2112.29	0.83215	0.80653	-2113.06	0.83221	0.83785	0.75863	-2112.28	J00236	1132005	0.85027	0.82051	0.57859	-3613.5	0.83801	0.57371	0.81107	-3613.16
18.1246	2.06911e-05	A00149	708368	0.94652	0.84432	-985.737	0.91216	0.38359	-976.674	708368	0.94652	0.86875	-1358.43	0.84777	0.90261	-1358.1	0.6743	0.88625	-1355.83	0.67388	0.8832	0.89061	-1355.82	A00149	708368	0.94652	0.88126	0.38885	-2335.58	0.91217	0.3835	0.86802	-2335.1
18.123	2.07085e-05	E00312	1687681	0.81283	0.67371	-1262.4	0.77872	0.41384	-1253.34	1687681	0.81283	0.67633	-1845.97	0.66935	0.6967	-1845.89	0.53529	0.71842	-1841.85	0.53529	0.76009	0.65605	-1841.14	E00312	1687681	0.81283	0.70811	0.43937	-3101.76	0.77841	0.41343	0.67591	-3099.31
18.1076	2.08767e-05	B01799	18458893	0.55615	0.39111	-490.417	0.51633	0.07099	-481.364	18458893	0.55615	0.64815	-1016.46	0.67303	0.5971	-1015.93	0.35631	0.6969	-1008.05	0.35631	0.77727	0.56678	-1004.28	B01799	18458893	0.55615	0.61454	0.04647	-1500.44	0.51651	0.07115	0.64815	-1497.83
18.0928	2.10396e-05	N01668	14469279	0.93583	0.61599	-387.633	0.38012	1	-378.586	14469279	0.93583	0.71083	-723.532	0.71885	0.68589	-723.503	0.82295	0.68552	-723.064	0.82296	0.67505	0.70158	-723.051	N01668	14469279	0.93583	0.61831	0.99999	-1106.9	0.38027	0.99999	0.71052	-1102.12
18.0924	2.1044e-05	E01515	17865704	0.95722	0.94061	-963.89	0.98597	0.77024	-954.844	17865704	0.95722	0.9028	-1957.08	0.87652	0.95431	-1954.73	0.873	0.90903	-1956.69	0.87303	0.878	0.95406	-1954.72	E01515	17865704	0.95722	0.92736	0.79085	-2919.07	0.98596	0.7698	0.90276	-2911.93
18.087	2.11037e-05	N01024	7401602	0.60428	0.57652	-337.799	0.66467	0.11557	-328.755	7401602	0.60428	0.55516	-590.126	0.55562	0.55325	-590.125	0.48483	0.56587	-589.721	0.48483	0.58352	0.53978	-589.624	N01024	7401602	0.60428	0.59276	0.15144	-921.139	0.66446	0.1152	0.55498	-918.881
18.0404	2.16266e-05	J01306	14386718	0.58289	0.85858	-490.654	0.99999	0.51149	-481.634	14386718	0.58289	0.75379	-917.114	0.76031	0.72998	-917.051	0.99999	0.66528	-904.924	0.99999	0.54983	0.84039	-901.947	J01306	14386718	0.58289	0.81794	0.60782	-1407.92	0.99997	0.5115	0.75379	-1398.75
18.0376	2.16585e-05	K00854	10323818	0.50267	0.8308	-471.803	0.92723	0.43806	-462.784	10323818	0.50267	0.84391	-886.536	0.84252	0.84708	-886.534	0.77747	0.85135	-886.202	0.77748	0.86055	0.8388	-886.168	K00854	10323818	0.50267	0.87011	0.46216	-1351.06	0.92711	0.43792	0.84385	-1349.32
18.0286	2.17611e-05	I00606	11678327	0.5508	0.71659	-1438.76	0.61964	0.99998	-1429.75	11678327	0.5508	0.65035	-2737.45	0.61861	0.71337	-2736.71	0.75335	0.62418	-2735.97	0.75332	0.54553	0.73208	-2733.65	I00606	11678327	0.5508	0.64038	0.99994	-4167.36	0.6196	0.99994	0.65043	-4167.19
18.0276	2.17725e-05	D00957	4690648	0.3262	0.40155	-754.215	0.48245	0.14666	-745.201	4690648	0.3262	0.48189	-1199.36	0.48954	0.45954	-1199.26	0.34529	0.51097	-1196.51	0.34545	0.56546	0.42731	-1195.15	D00957	4690648	0.3262	0.48285	0.15003	-1911.78	0.48447	0.14938	0.48202	-1911.78
18.0076	2.20025e-05	M00470	7028017	0.50267	0.709	-1969.69	0.63134	0.86732	-1960.69	7028017	0.50267	0.62043	-2502.12	0.59341	0.67247	-2501.19	0.52409	0.64639	-2499.59	0.52384	0.63669	0.65866	-2499.53	M00470	7028017	0.50267	0.62395	0.868	-4462.84	0.63053	0.86764	0.62048	-4462.8
18	2.20905e-05	F00341	1614812	0.80749	0.83861	-582.526	0.92035	0.58304	-573.526	1614812	0.80749	0.8461	-1280.5	0.84986	0.83559	-1280.47	0.78294	0.85642	-1279.93	0.78295	0.87528	0.82568	-1279.67	F00341	1614812	0.80749	0.87091	0.59928	-1855.97	0.92034	0.58295	0.84623	-1854.03
17.9986	2.21067e-05	E00501	2795674	0.63636	0.71962	-1233.55	0.65506	0.92539	-1224.55	2795674	0.63636	0.74765	-1817.79	0.7534	0.73145	-1817.7	0.84383	0.72091	-1814.73	0.84371	0.69766	0.75283	-1814.41	E00501	2795674	0.63636	0.71549	0.9164	-3045.35	0.65469	0.92544	0.74765	-3042.35
17.9854	2.22606e-05	A00083	373438	0.42246	0.34267	-3959.01	0.41874	0.18108	-3950.02	373438	0.42246	0.372	-4742.2	0.36825	0.38344	-4742.16	0.34827	0.37924	-4742.02	0.34827	0.37924	0.37924	-4742.02	A00083	373438	0.42246	0.38773	0.17734	-8515.93	0.41765	0.17257	0.37145	-8515.18
17.985	2.22653e-05	C00561	13576863	0.20321	0.23748	-429.724	0.10211	0.6437	-420.731	13576863	0.20321	0.15224	-1019.46	0.20725	0.02449	-1017.72	0.16328	0.15014	-1019.44	0.16352	0.2282	0.00471	-1017.4	C00561	13576863	0.20321	0.14027	0.61746	-1440.77	0.10173	0.64341	0.15229	-1440.19
17.977	2.2359e-05	N00390.N00391	1857894	0.88235	0.89246	-1183.65	0.96425	0.57322	-1174.66	1857894	0.88235	0.91813	-2603.81	0.92303	0.9005	-2603.69	0.82791	0.92574	-2602.71	0.82796	0.9387	0.89495	-2602.29	N00390.N00391	1857894	0.88235	0.9288	0.5851	-3779.44	0.96418	0.57333	0.91809	-3778.47
17.9726	2.24108e-05	H02108	20537947	0.71658	0.59746	-1074.7	0.70392	0.33965	-1065.71	20537947	0.71658	0.6684	-1817.18	0.64359	0.71599	-1816.65	0.49051	0.70721	-1812.14	0.49052	0.72162	0.68594	-1812.03	H02108	20537947	0.71658	0.67937	0.34853	-2883.19	0.70371	0.34003	0.6684	-2882.89
17.9622	2.25335e-05	C00498	12717741	0.86631	0.7686	-899.78	0.99999	0.14966	-890.799	12717741	0.86631	0.97017	-1235.99	0.99998	0.87971	-1235.66	0.90419	0.98314	-1235.85	0.90419	0.99999	0.87975	-1235.4	C00498	12717741	0.86631	0.98387	0.1562	-2126.89	0.99997	0.14978	0.96984	-2126.79
17.9584	2.25786e-05	I00370	7674853	0.74332	0.75046	-821.412	0.88287	0.32409	-812.432	7674853	0.74332	0.75982	-1202.75	0.80904	0.66538	-1202.04	0.72227	0.76564	-1202.66	0.72216	0.8517	0.63628	-1201.35	I00370	7674853	0.74332	0.79996	0.37568	-2017.5	0.88232	0.32458	0.75956	-2015.18
17.9558	2.26094e-05	A00393	2027304	0.36364	0.31038	-1262.66	0.18916	0.5332	-1253.69	2027304	0.36364	0.35497	-2410.33	0.34427	0.38399	-2410.1	0.44014	0.33172	-2408.74	0.44021	0.27404	0.41131	-2407.12	A00393	2027304	0.36364	0.31242	0.48296	-3670.52	0.18904	0.53302	0.35487	-3664.01
17.9556	2.26118e-05	L01016	20650268	0.26203	0.2414	-3589.03	0.30216	0.13829	-3580.05	20650268	0.26203	0.27487	-3720.56	0.31296	0.20357	-3717.18	0.3267	0.26212	-3719.46	0.32658	0.30561	0.20508	-3717.1	L01016	20650268	0.26203	0.28422	0.14066	-7257.91	0.30158	0.14039	0.27519	-7257.5
17.9432	2.27596e-05	M01804	20215023	0.67914	0.66678	-584.989	0.57834	0.97166	-576.017	20215023	0.67914	0.74005	-773.568	0.7095	0.80969	-772.645	0.73505	0.74112	-773.564	0.73446	0.69796	0.81489	-772.529	M01804	20215023	0.67914	0.68497	0.92099	-1355.69	0.57895	0.97149	0.74008	-1349.59
17.939	2.28099e-05	M00331	5772229	0.83422	0.76379	-1808.77	0.68132	0.94004	-1799.8	5772229	0.83422	0.71378	-2241.14	0.69488	0.75342	-2240.72	0.70037	0.71622	-2241.11	0.70029	0.69183	0.7544	-2240.71	M00331	5772229	0.83422	0.70277	0.93746	-4041.24	0.68115	0.93994	0.71342	-4040.94
17.9374	2.28291e-05	C00855	16024896	0.26738	0.25359	-3612.78	0.16387	0.4629	-3603.81	16024896	0.26738	0.23028	-4057.79	0.2255	0.24548	-4057.72	0.17592	0.24636	-4056.92	0.17675	0.25229	0.23835	-4056.9	C00855	16024896	0.26738	0.21026	0.45555	-7662.96	0.16445	0.46282	0.2302	-7661.59
17.935	2.28579e-05	M00953	16208085	0.7861	0.69275	-604.402	0.5942	0.98951	-595.435	16208085	0.7861	0.79598	-1137.44	0.84753	0.68697	-1135.37	0.86044	0.78063	-1136.46	0.86069	0.83699	0.69406	-1135.3	M00953	16208085	0.7861	0.73561	0.93157	-1742.17	0.59459	0.9896	0.79612	-1732.88
17.9246	2.29831e-05	L01762	25271731	0.91444	0.77455	-1903.28	0.70957	0.99999	-1894.32	25271731	0.91444	0.75193	-2237.19	0.731	0.79902	-2236.61	0.71164	0.76069	-2236.88	0.7116	0.73935	0.79635	-2236.53	L01762	25271731	0.91444	0.73665	0.99998	-4074.38	0.70921	0.99998	0.75178	-4073.83
17.915	2.30993e-05	H01249.H01250	14754820	0.81818	0.84295	-2877.06	0.90445	0.72987	-2868.1	14754820	0.81818	0.83772	-3836.15	0.86177	0.78751	-3834.42	0.85455	0.83291	-3835.98	0.85453	0.86635	0.78615	-3834.38	H01249.H01250	14754820	0.81818	0.85848	0.73699	-6707.69	0.90423	0.72989	0.83742	-6704.25
17.914	2.31115e-05	M01039	16636062	0.71123	0.52951	-1385.33	0.41528	0.74553	-1376.38	16636062	0.71123	0.57714	-1997.89	0.57912	0.57001	-1997.88	0.56269	0.58043	-1997.85	0.56305	0.5907	0.56424	-1997.79	M01039	16636062	0.71123	0.53066	0.69695	-3337.28	0.41657	0.74128	0.57684	-3331.19
17.9132	2.31212e-05	D01539	9919073	0.19786	0.22959	-1933.29	0.3045	0.0068	-1924.33	9919073	0.19786	0.20888	-2267.52	0.19765	0.23539	-2267.33	0.14743	0.21867	-2267.08	0.14666	0.20814	0.23184	-2267.04	D01539	9919073	0.19786	0.24644	0.01604	-4194.18	0.30396	0.00657	0.20901	-4191.85
17.9106	2.31528e-05	N03285.N03286	25748968	0.13369	0.60649	-877.717	0.44226	0.92674	-868.762	25748968	0.13369	0.4836	-1560.69	0.41991	0.60071	-1559.1	0.4649	0.48706	-1560.67	0.46486	0.39871	0.6079	-1558.93	N03285.N03286	25748968	0.13369	0.4721	0.91628	-2429.63	0.44486	0.92594	0.48367	-2429.46
17.9018	2.32601e-05	J01712	18314008	0.63102	0.8108	-2909.65	0.75283	0.91521	-2900.7	18314008	0.63102	0.78374	-3543.83	0.78391	0.78339	-3543.83	0.77145	0.78684	-3543.76	0.77146	0.79074	0.78179	-3543.74	J01712	18314008	0.63102	0.77375	0.91341	-6445.09	0.75255	0.91512	0.78367	-6444.53
17.8836	2.34836e-05	G01022	10567950	0.48128	0.57598	-935.566	0.49066	0.87469	-926.625	10567950	0.48128	0.54505	-1322.52	0.54317	0.5525	-1322.51	0.61187	0.53021	-1321.89	0.61187	0.50207	0.57913	-1321.62	G01022	10567950	0.48128	0.52601	0.86564	-2249.79	0.49043	0.87439	0.54509	-2249.14
17.881	2.35157e-05	A00835	4953003	0.53476	0.39059	-238.418	0.53276	0	-229.478	4953003	0.53476	0.37238	-734.803	0.39365	0.32311	-734.646	0.22362	0.40914	-732.913	0.22361	0.50127	0.26039	-731.469	A00835	4953003	0.53476	0.41447	0	-966.48	0.53224	0	0.37242	-964.281
17.8698	2.36545e-05	L02004.L02005	26430324	0.72727	0.74182	-1960.34	0.66085	0.93115	-1951.41	26430324	0.72727	0.82036	-2616.83	0.82036	0.82218	-2616.82	0.84273	0.81664	-2616.72	0.84273	0.8108	0.82528	-2616.69	L02004.L02005	26430324	0.72727	0.76591	0.90797	-4576.59	0.66034	0.93089	0.82051	-4568.23
17.8692	2.3662e-05	F01631	16144724	0.72193	0.86104	-636.921	1	0.45484	-627.986	16144724	0.72193	0.86775	-1113.56	0.86138	0.88967	-1113.5	0.80314	0.8837	-1113.09	0.80342	0.88879	0.87363	-1113.08	F01631	16144724	0.72193	0.90511	0.51698	-1744.87	0.99999	0.45477	0.8675	-1741.54
17.8628	2.37417e-05	I00582.I00583	11459266	0.90909	0.94565	-2974.9	0.99047	0.86651	-2965.96	11459266	0.90909	0.95165	-4370.6	0.94961	0.95548	-4370.57	0.9533	0.95131	-4370.6	0.9533	0.94784	0.9557	-4370.54	I00582.I00583	11459266	0.90909	0.96185	0.87547	-7247.2	0.99052	0.86575	0.95149	-7243.73
17.8564	2.38217e-05	N02952	24258711	0.60428	0.70352	-3919.66	0.63275	0.82441	-3910.73	24258711	0.60428	0.658	-4675.51	0.64987	0.67711	-4675.3	0.60396	0.67427	-4674.26	0.60397	0.6754	0.6729	-4674.26	N02952	24258711	0.60428	0.65027	0.81798	-8310.69	0.63405	0.81991	0.65817	-8310.42
17.8564	2.38217e-05	F00219	1027704	0.47059	0.56196	-2707.66	0.63642	0.43122	-2698.74	1027704	0.47059	0.61686	-2889.83	0.61889	0.61244	-2889.82	0.64712	0.60866	-2889.5	0.64712	0.60236	0.61642	-2889.47	F00219	1027704	0.47059	0.62353	0.43802	-5512.55	0.63776	0.4363	0.61685	-5512.36
17.8502	2.38994e-05	C01134	17619323	0.41176	0.61529	-2258.83	0.71762	0.28568	-2249.91	17619323	0.41176	0.60614	-2973.65	0.60082	0.62135	-2973.61	0.68948	0.58618	-2972.76	0.68949	0.55634	0.63382	-2972.38	C01134	17619323	0.41176	0.64337	0.29576	-5101.79	0.7158	0.27546	0.60619	-5099.58
17.839	2.40405e-05	I00456	9912510	0.58824	0.33732	-822.377	0.19685	0.59074	-813.458	9912510	0.58824	0.39234	-1098.4	0.38649	0.40819	-1098.36	0.37834	0.39575	-1098.38	0.37829	0.38568	0.40819	-1098.35	I00456	9912510	0.58824	0.33945	0.52629	-1918.57	0.19747	0.58983	0.39234	-1911.86
17.839	2.40405e-05	M01362	18056687	0.50802	0.4506	-701.477	0.3476	0.74643	-692.558	18056687	0.50802	0.37435	-1234.12	0.40943	0.30075	-1233.47	0.42094	0.36412	-1233.9	0.42101	0.40596	0.30343	-1233.46	M01362	18056687	0.50802	0.36492	0.74285	-1926.79	0.34692	0.7463	0.37387	-1926.68
17.8378	2.40557e-05	L00173	1243944	0.70053	0.77987	-2669.11	0.70787	0.91144	-2660.19	1243944	0.70053	0.75166	-3872.81	0.76865	0.71529	-3872.1	0.81269	0.73194	-3870.88	0.81288	0.73997	0.72107	-3870.81	L00173	1243944	0.70053	0.73807	0.90384	-6497.69	0.70659	0.90967	0.75167	-6496.78
17.8366	2.40708e-05	H00991	7419790	0.57219	0.74879	-1720.02	0.67188	0.9736	-1711.1	7419790	0.57219	0.72297	-1766.74	0.72956	0.70774	-1766.65	0.75186	0.71653	-1766.54	0.75224	0.72266	0.70951	-1766.53	H00991	7419790	0.57219	0.70614	0.9517	-3333.75	0.67152	0.9663	0.72302	-3332.88
17.8346	2.40961e-05	J00418	1869776	0.38503	0.2336	-977.872	0.31795	0.05529	-968.954	1869776	0.38503	0.2574	-1892.18	0.26461	0.23998	-1892.04	0.10344	0.28874	-1885.79	0.10335	0.33249	0.22456	-1884.03	J00418	1869776	0.38503	0.27503	0.06525	-2862.32	0.31789	0.05523	0.25759	-2861.13
17.8242	2.42282e-05	K00888	10623650	0.54011	0.66409	-1659.14	0.56942	0.87199	-1650.23	10623650	0.54011	0.6007	-2236.48	0.56285	0.68708	-2234.81	0.55409	0.61617	-2235.87	0.55407	0.56773	0.6851	-2234.79	K00888	10623650	0.54011	0.59137	0.86666	-3886.96	0.56965	0.87161	0.60082	-3886.71
17.8134	2.43661e-05	F00028	150425	0.96791	0.85264	-780.627	0.99998	0.414	-771.721	150425	0.96791	0.86953	-1407.2	0.86823	0.87262	-1407.2	0.75891	0.89382	-1406.02	0.7589	0.91502	0.84605	-1405.83	F00028	150425	0.96791	0.90482	0.47532	-2181.24	0.99977	0.41432	0.86907	-2178.92
17.8086	2.44277e-05	I01134.I01135	14794411	0.91444	0.92435	-2425.02	0.97484	0.82863	-2416.12	14794411	0.91444	0.91187	-2888.42	0.91849	0.8967	-2888.17	0.90447	0.91361	-2888.38	0.90447	0.92958	0.89448	-2887.91	I01134.I01135	14794411	0.91444	0.93028	0.83542	-5309.32	0.97486	0.82741	0.91179	-5304.54
17.8046	2.44791e-05	A00312	1578488	0.89305	0.72736	-642.616	0.82107	0.38189	-633.714	1578488	0.89305	0.74774	-1359.24	0.71768	0.79961	-1358.52	0.53221	0.77475	-1355.06	0.53219	0.76834	0.78376	-1355.03	A00312	1578488	0.89305	0.76856	0.39609	-1994.15	0.82044	0.38213	0.74745	-1992.95
17.7928	2.46314e-05	B01443	16379983	0.65241	0.59181	-572.897	0.48677	0.94244	-564.001	16379983	0.65241	0.63988	-1112.63	0.61844	0.68552	-1112.23	0.53365	0.65457	-1111.53	0.53374	0.64276	0.67498	-1111.46	B01443	16379983	0.65241	0.59327	0.89033	-1681.51	0.48725	0.94233	0.63982	-1676.63
17.7924	2.46365e-05	J00267	1264692	0.92513	0.7679	-1558.69	0.8564	0.53488	-1549.8	1264692	0.92513	0.77635	-2274.35	0.7836	0.75052	-2274.21	0.76161	0.78059	-2274.29	0.76145	0.80744	0.74008	-2273.96	J00267	1264692	0.92513	0.80375	0.55007	-3826.08	0.8562	0.53477	0.77571	-3824.14
17.776	2.48498e-05	M01358.M01359	18045548	0.97326	0.8719	-1788.69	0.94737	0.69331	-1779.81	18045548	0.97326	0.89466	-2752.07	0.8887	0.90979	-2751.97	0.85701	0.90215	-2751.7	0.85701	0.90127	0.90481	-2751.7	M01358.M01359	18045548	0.97326	0.91237	0.70489	-4533.25	0.9474	0.69323	0.89424	-4531.87
17.7736	2.48812e-05	J01260	13502138	0.28877	0.65595	-884.42	0.76892	0.3247	-875.533	13502138	0.28877	0.62982	-1775.92	0.62283	0.66073	-1775.81	0.59711	0.63777	-1775.76	0.59649	0.62514	0.65878	-1775.73	J01260	13502138	0.28877	0.66995	0.36551	-2655.03	0.76866	0.32487	0.62981	-2651.46
17.7686	2.49467e-05	M01086	16837747	0.36898	0.51303	-483.18	0.37716	0.79757	-474.296	16837747	0.36898	0.6029	-540.501	0.60581	0.59539	-540.49	0.62001	0.5979	-540.449	0.61989	0.59762	0.59854	-540.449	M01086	16837747	0.36898	0.53915	0.71796	-1023.44	0.37815	0.7971	0.60289	-1014.8
17.7332	2.54152e-05	J00663	3808819	0.93583	0.91529	-1724.66	0.98162	0.75691	-1715.79	3808819	0.93583	0.92247	-2462.05	0.91965	0.93052	-2462.02	0.84797	0.94189	-2459.73	0.84793	0.9617	0.914	-2459.21	J00663	3808819	0.93583	0.94047	0.76892	-4180.53	0.98181	0.75644	0.92247	-4177.84
17.7084	2.57487e-05	M00411	6605939	0.81818	0.84654	-1268.91	0.90011	0.46149	-1260.06	6605939	0.81818	0.80236	-2794.57	0.80993	0.78035	-2794.47	0.74487	0.81674	-2794.05	0.74487	0.84677	0.76761	-2793.57	M00411	6605939	0.81818	0.84492	0.48236	-4057.92	0.90006	0.46152	0.80239	-4054.62
17.7058	2.57839e-05	N02821	23536098	0.82888	0.42171	-1206.04	0.55533	0.10605	-1197.19	23536098	0.82888	0.72263	-2528.01	0.73494	0.68319	-2527.87	0.45057	0.77704	-2523.06	0.45147	0.85453	0.63921	-2521.31	N02821	23536098	0.82888	0.67313	0.09229	-3727.83	0.55599	0.10516	0.72224	-3725.2
17.6976	2.58953e-05	N00261	1215283	0.94118	0.66051	-603.587	0.82871	0.22407	-594.738	1215283	0.94118	0.80119	-1167.16	0.83922	0.74143	-1166.89	0.63075	0.83225	-1165.99	0.63072	0.94753	0.70177	-1164.67	N00261	1215283	0.94118	0.80959	0.22733	-1761.95	0.82819	0.22361	0.80114	-1761.9
17.6916	2.59771e-05	J01292	14200161	0.6738	0.87295	-1901.54	0.944	0.71088	-1892.69	14200161	0.6738	0.85147	-2287.77	0.8824	0.79819	-2286.34	0.87018	0.84694	-2287.64	0.86988	0.89144	0.79459	-2286.24	J01292	14200161	0.6738	0.88021	0.73725	-4185.38	0.94376	0.71078	0.85139	-4180.46
17.6748	2.62076e-05	B01874	18789262	0.5615	0.5815	-2113.75	0.50315	0.74614	-2104.91	18789262	0.5615	0.59122	-3320.82	0.59192	0.58935	-3320.82	0.63803	0.57679	-3319.97	0.63803	0.56325	0.59666	-3319.81	B01874	18789262	0.5615	0.56376	0.73148	-5428.68	0.50307	0.7458	0.5912	-5425.73
17.6722	2.62434e-05	J01709	18296332	0.62567	0.72003	-1379.39	0.98503	0.26347	-1370.56	18296332	0.62567	0.5489	-2143.96	0.68603	0.26937	-2139.82	0.76766	0.47165	-2141.62	0.76787	0.62335	0.28197	-2139.42	J01709	18296332	0.62567	0.67364	0.30063	-3521.31	0.98519	0.26393	0.54809	-3514.51
17.6606	2.6404e-05	J01645	17944407	0.66845	0.32862	-478.935	0.1514	0.75284	-470.105	17944407	0.66845	0.30883	-828.495	0.29083	0.34492	-828.406	0.15864	0.3363	-827.447	0.1587	0.34663	0.3202	-827.428	J01645	17944407	0.66845	0.25809	0.70737	-1300.65	0.15155	0.75275	0.30876	-1298.6
17.6546	2.64874e-05	B01275	14941495	0.50802	0.47178	-1172.72	0.59582	0.251	-1163.89	14941495	0.50802	0.57647	-2243.64	0.57875	0.56959	-2243.63	0.54095	0.5872	-2243.35	0.54092	0.60487	0.56035	-2243.19	B01275	14941495	0.50802	0.58145	0.255	-3407.6	0.59518	0.25091	0.57647	-3407.53
17.65	2.65515e-05	E00507	2847121	0.47059	0.53444	-462.434	0.67741	0.10673	-453.609	2847121	0.47059	0.62645	-1057.47	0.65456	0.56982	-1056.98	0.4998	0.64859	-1055.78	0.4998	0.72805	0.52951	-1053.57	E00507	2847121	0.47059	0.63786	0.12471	-1511.47	0.67711	0.10701	0.62624	-1511.08
17.6446	2.6627e-05	N02819	23530815	0.86631	0.88685	-1553.53	0.94342	0.72758	-1544.71	23530815	0.86631	0.92359	-2205.72	0.94128	0.89284	-2204.76	0.94085	0.9188	-2205.51	0.94065	0.94136	0.89287	-2204.76	N02819	23530815	0.86631	0.93048	0.73161	-3750.79	0.94337	0.72732	0.92363	-3750.43
17.6342	2.6773e-05	M01323	17935983	0.94652	0.46483	-120.755	0.23324	1	-111.938	17935983	0.94652	0.43333	-247.401	0.48338	0.3376	-246.985	0.72373	0.38885	-245.226	0.72372	0.39763	0.37771	-245.221	M01323	17935983	0.94652	0.38047	1	-361.093	0.23341	1	0.43293	-359.339
17.6324	2.67984e-05	D01490	9135047	0.87701	0.87591	-1840.8	0.94907	0.59172	-1831.98	9135047	0.87701	0.95493	-2509.2	0.95448	0.95551	-2509.19	0.91786	0.96123	-2509	0.91749	0.96943	0.94958	-2508.95	D01490	9135047	0.87701	0.9522	0.59103	-4341.19	0.94926	0.59172	0.95471	-4341.18
17.6268	2.68774e-05	C00418	10253001	0.7754	0.61195	-778.113	0.50391	0.79184	-769.3	10253001	0.7754	0.69966	-1179.68	0.6731	0.75059	-1178.76	0.53396	0.74557	-1172.04	0.53446	0.76346	0.72175	-1171.81	C00418	10253001	0.7754	0.64516	0.75546	-1958.98	0.50413	0.79142	0.69937	-1948.98
17.6264	2.6883e-05	L01448.L01449	23735338	0.65241	0.61101	-2112.66	0.52679	0.7307	-2103.84	23735338	0.65241	0.57805	-3095.73	0.57069	0.59521	-3095.57	0.58052	0.57724	-3095.73	0.5804	0.5606	0.59761	-3095.49	L01448.L01449	23735338	0.65241	0.56269	0.72451	-5200.66	0.52653	0.73034	0.578	-5199.57
17.6096	2.71216e-05	B01753	18225267	0.11765	0.19685	-1562.31	0.11388	0.36272	-1553.51	18225267	0.11765	0.19536	-2373.41	0.21639	0.14387	-2372.8	0.18931	0.19737	-2373.4	0.18931	0.24254	0.12358	-2372.3	B01753	18225267	0.11765	0.17269	0.3338	-3930.3	0.1131	0.362	0.19531	-3926.92
17.605	2.71873e-05	M01796	20181098	0.74332	0.84675	-2912.91	0.78343	0.97761	-2904.1	20181098	0.74332	0.76727	-3930.76	0.77458	0.74916	-3930.63	0.852	0.7484	-3928.9	0.85196	0.74252	0.75673	-3928.87	M01796	20181098	0.74332	0.77255	0.97743	-6752.51	0.7841	0.97743	0.7669	-6752.39
17.605	2.71873e-05	N00509	2504755	0.37433	0.24135	-1919.96	0.35613	0.07042	-1911.15	2504755	0.37433	0.40565	-3068.79	0.46251	0.27181	-3064.59	0.44905	0.3944	-3068.39	0.44914	0.47014	0.26964	-3064.54	N00509	2504755	0.37433	0.39373	0.06456	-4902.74	0.35999	0.0712	0.40574	-4902.27
17.604	2.72016e-05	A00894	5469983	0.72727	0.56067	-227.345	0.36304	1	-218.543	5469983	0.72727	0.53841	-376.514	0.49532	0.62785	-376.144	0.53486	0.53961	-376.513	0.53486	0.4619	0.64842	-376.01	A00894	5469983	0.72727	0.48275	0.99998	-597.172	0.36275	1	0.53859	-595.057
17.5732	2.76457e-05	H02526.H02527.H02528.H02529	24766752	0.78075	0.82729	-4452.48	0.8918	0.68235	-4443.69	24766752	0.78075	0.84368	-4801.35	0.84127	0.8512	-4801.32	0.81928	0.84958	-4801.12	0.81933	0.85004	0.84949	-4801.12	H02526.H02527.H02528.H02529	24766752	0.78075	0.86019	0.68121	-8861.81	0.89224	0.67506	0.84358	-8860.42
17.5668	2.77389e-05	A01125	10906812	0.68984	0.71998	-1121.94	0.63583	0.88725	-1113.16	10906812	0.68984	0.71692	-1833.56	0.70447	0.74102	-1833.35	0.64987	0.73176	-1832.4	0.64986	0.73317	0.72903	-1832.4	A01125	10906812	0.68984	0.69257	0.87214	-2948.98	0.63573	0.8864	0.71694	-2946.72
17.5602	2.78354e-05	B01446	16403559	0.03209	0.09615	-1195.14	1e-05	0.39105	-1186.36	16403559	0.03209	0.07878	-1824.16	0.07647	0.08641	-1824.15	0.24074	0.05319	-1820.91	0.24073	0.02671	0.11551	-1820.2	B01446	16403559	0.03209	0.05291	0.35959	-3012.73	0	0.3905	0.07871	-3010.52
17.5544	2.79204e-05	D02150	18203152	0.55615	0.78211	-1266.37	0.65182	0.99977	-1257.59	18203152	0.55615	0.75875	-1710.28	0.69318	0.89244	-1707.33	0.79887	0.74745	-1709.95	0.79834	0.61954	0.92281	-1704.62	D02150	18203152	0.55615	0.73087	0.97445	-2922.34	0.65764	0.99914	0.75898	-2920.4
17.5346	2.82127e-05	A00791	4552618	0.57219	0.83542	-1254.05	0.9196	0.6309	-1245.28	4552618	0.57219	0.85523	-2347.89	0.87736	0.80116	-2346.77	0.93703	0.83241	-2344.2	0.93702	0.84094	0.81859	-2344.14	A00791	4552618	0.57219	0.87088	0.65396	-3553.85	0.91943	0.63487	0.85507	-3551.83
17.5328	2.82394e-05	H01333.H01334	15513557	0.97861	0.60354	-354.763	0.79966	0.15841	-345.997	15513557	0.97861	0.67659	-861.261	0.63634	0.75644	-860.794	0.31915	0.73832	-854.105	0.31915	0.78104	0.6724	-853.797	H01333.H01334	15513557	0.97861	0.708	0.20042	-1208.51	0.79894	0.15862	0.67648	-1207.26
17.5284	2.83048e-05	E01417	17236588	0.60428	0.32358	-411.81	0.20549	0.6959	-403.045	17236588	0.60428	0.32991	-648.398	0.3287	0.3343	-648.396	0.29711	0.34001	-648.216	0.29701	0.35379	0.31924	-648.168	E01417	17236588	0.60428	0.29328	0.65279	-1054.15	0.20544	0.69557	0.33021	-1051.44
17.5092	2.85921e-05	M02031.M02032	21209874	0.79679	0.87243	-468.946	1	0.65969	-460.191	21209874	0.79679	0.8997	-1402.69	0.92083	0.85263	-1402.05	0.92083	0.89445	-1402.54	0.92083	0.92169	0.85222	-1402.05	M02031.M02032	21209874	0.79679	0.91751	0.70903	-1866.87	0.99998	0.65941	0.89965	-1862.88
17.501	2.87157e-05	B00303	1387951	0.62567	0.69704	-4475.83	0.63277	0.86037	-4467.07	1387951	0.62567	0.67083	-5014.84	0.66988	0.67336	-5014.84	0.71476	0.65873	-5014.27	0.71478	0.64612	0.67746	-5014.12	B00303	1387951	0.62567	0.65613	0.84922	-9179.73	0.62953	0.85102	0.67111	-9179.1
17.499	2.87459e-05	F01303	7730132	0.91979	0.88581	-1308.83	0.82349	1	-1300.08	7730132	0.91979	0.95794	-2386.58	0.94272	0.99992	-2386.03	0.95048	0.96087	-2386.54	0.95028	0.93629	0.99998	-2385.98	F01303	7730132	0.91979	0.90979	0.99999	-3694.43	0.8236	1	0.95798	-3686.66
17.4954	2.88004e-05	E00317	1717478	0.67914	0.37225	-707.886	0.24537	0.71163	-699.139	1717478	0.67914	0.47507	-1863.91	0.53517	0.32618	-1860.91	0.50055	0.46697	-1863.79	0.50055	0.5605	0.3166	-1860.63	E00317	1717478	0.67914	0.41768	0.65563	-2571.05	0.24532	0.71011	0.475	-2563.05
17.4928	2.88398e-05	I00681	12138198	0.68449	0.3166	-922.911	0.42742	0.01544	-914.165	12138198	0.68449	0.25405	-1723.01	0.24597	0.27719	-1722.88	0.18515	0.27781	-1721.68	0.18502	0.29443	0.25718	-1721.59	I00681	12138198	0.68449	0.30115	0.06414	-2642.83	0.42709	0.01525	0.25404	-2637.17
17.4882	2.89096e-05	A01158	11456317	0.72193	0.71883	-4899.25	0.63072	0.84977	-4890.5	11456317	0.72193	0.76319	-5581.99	0.75553	0.78013	-5581.86	0.76566	0.76206	-5581.99	0.76586	0.74764	0.78093	-5581.81	A01158	11456317	0.72193	0.72059	0.84164	-10176.3	0.6303	0.84859	0.76311	-10170.7
17.4846	2.89644e-05	B00405	1884264	0.84492	0.74392	-1451.61	0.86618	0.50502	-1442.87	1884264	0.84492	0.78372	-2471.39	0.80745	0.73719	-2470.89	0.75597	0.79097	-2471.24	0.75582	0.84242	0.72464	-2470.15	B00405	1884264	0.84492	0.80662	0.52888	-3915.8	0.86562	0.50522	0.78327	-3914.26
17.481	2.90193e-05	D02387	20044602	0.94118	0.69147	-642.98	0.83951	0.39791	-634.239	20044602	0.94118	0.80062	-843.208	0.84739	0.70806	-841.902	0.86755	0.7866	-842.658	0.86813	0.83979	0.71283	-841.839	D02387	20044602	0.94118	0.81129	0.40969	-1477.7	0.83962	0.39798	0.80045	-1477.45
17.4786	2.9056e-05	M00700	14719695	0.20321	0.30401	-6003.5	0.38623	0.17266	-5994.77	14719695	0.20321	0.29109	-6737.58	0.29257	0.28819	-6737.58	0.30622	0.2859	-6737.48	0.30622	0.28323	0.29084	-6737.47	M00700	14719695	0.20321	0.32177	0.16936	-12279.1	0.38683	0.16198	0.29114	-12275.9
17.472	2.9157e-05	I01129	14767392	0.59893	0.65025	-911.861	0.81211	0.24547	-903.125	14767392	0.59893	0.6672	-1731.2	0.65129	0.70477	-1731.01	0.72676	0.65052	-1730.72	0.72675	0.61003	0.71724	-1730.11	I01129	14767392	0.59893	0.70116	0.29492	-2598.53	0.81066	0.24075	0.66703	-2595.98
17.4586	2.93633e-05	N03345.N03346	25983821	0.86096	0.74346	-739.769	0.64217	0.96464	-731.039	25983821	0.86096	0.69572	-1337.4	0.68755	0.71482	-1337.32	0.51081	0.73111	-1333.68	0.51081	0.75728	0.69286	-1333.36	N03345.N03346	25983821	0.86096	0.67852	0.9608	-2068.96	0.6419	0.9646	0.69556	-2068.44
17.4574	2.93818e-05	H02133	20899045	0.62567	0.29738	-1212.96	0.1851	0.6478	-1204.23	20899045	0.62567	0.20202	-1978.21	0.16215	0.2998	-1976.63	0.18565	0.20813	-1978.14	0.18535	0.14011	0.30798	-1976.41	H02133	20899045	0.62567	0.19688	0.64167	-3182.5	0.18584	0.64741	0.20178	-3182.44
17.449	2.95119e-05	H01418	15983525	0.42781	0.79008	-1264.98	0.93961	0.56041	-1256.26	15983525	0.42781	0.84227	-1755.14	0.84227	0.84227	-1755.14	0.77689	0.85661	-1754.7	0.7769	0.87741	0.83011	-1754.58	H01418	15983525	0.42781	0.86945	0.5751	-3012.67	0.93961	0.56132	0.84226	-3011.4
17.444	2.95897e-05	F01030	4941906	0.12834	0.12436	-521.354	0	0.81179	-512.632	4941906	0.12834	0.16133	-1157.57	0.123	0.21632	-1157.16	0.08347	0.16628	-1157.46	0.08408	0.12674	0.21506	-1157.13	F01030	4941906	0.12834	0.12143	0.75726	-1673.24	0	0.81237	0.16189	-1670.21
17.428	2.98398e-05	E00208.E00209	1098717	0.81283	0.69167	-855.869	0.79051	0.37506	-847.155	1098717	0.81283	0.78693	-1803.05	0.80352	0.74089	-1802.61	0.83533	0.77323	-1802.35	0.8352	0.78613	0.74963	-1802.24	E00208.E00209	1098717	0.81283	0.78742	0.38357	-2599.45	0.78895	0.38338	0.78694	-2599.45
17.4264	2.98649e-05	M00736	14928689	0.75401	0.86651	-234.149	1	0.38226	-225.436	14928689	0.75401	0.98277	-843.189	0.9811	0.98707	-843.173	0.89945	0.98333	-843.038	0.89942	0.9784	0.99014	-843.022	M00736	14928689	0.75401	0.9865	0.39146	-1069.05	1	0.38229	0.98276	-1068.62
17.4208	2.9953e-05	N00103	448324	0.32086	0.32475	-917.077	0.40031	0.03573	-908.367	448324	0.32086	0.31112	-1813.16	0.29402	0.34754	-1812.81	0.2686	0.31986	-1812.8	0.26843	0.30409	0.34353	-1812.65	N00103	448324	0.32086	0.33897	0.05751	-2723.77	0.40024	0.03654	0.31101	-2721.53
17.4158	3.00319e-05	L00698	10234430	0.57219	0.68887	-546.915	0.55647	1	-538.208	10234430	0.57219	0.44518	-839.65	0.46337	0.40963	-839.492	0.52097	0.43141	-839.17	0.52097	0.4386	0.42109	-839.157	L00698	10234430	0.57219	0.47688	1	-1379.44	0.55623	1	0.44523	-1377.86
17.4052	3.01999e-05	D00568	2680423	0.93583	0.92608	-3507.66	0.88064	1	-3498.96	2680423	0.93583	0.94996	-4530.76	0.94987	0.94996	-4530.76	0.93835	0.95297	-4530.62	0.93834	0.95561	0.94908	-4530.59	D00568	2680423	0.93583	0.92862	0.99999	-7954.25	0.88088	0.99999	0.94987	-7949.87
17.4042	3.02158e-05	G00563	3757741	0.79144	0.75907	-5036.48	0.69048	0.89808	-5027.78	3757741	0.79144	0.74753	-5944.11	0.7498	0.73958	-5944.09	0.79326	0.73194	-5943.26	0.79324	0.72186	0.74655	-5943.18	G00563	3757741	0.79144	0.7268	0.89089	-10754.4	0.68872	0.89589	0.74718	-10753.1
17.4022	3.02476e-05	M01199.M01200	17407269	0.44385	0.58589	-375.701	0.43321	0.95539	-367	17407269	0.44385	0.60026	-648.698	0.6695	0.44629	-646.81	0.72158	0.57237	-647.085	0.72158	0.63386	0.47236	-646.392	M01199.M01200	17407269	0.44385	0.55408	0.88391	-1019.33	0.43461	0.95452	0.60027	-1015.7
17.4006	3.0273e-05	D02080	17885172	0.6631	0.51289	-1679.84	0.60353	0.33324	-1671.14	17885172	0.6631	0.56707	-2583.88	0.56208	0.58076	-2583.82	0.5696	0.56641	-2583.87	0.56973	0.55542	0.58298	-2583.79	D02080	17885172	0.6631	0.57844	0.3398	-4255.44	0.60293	0.33347	0.56706	-4255.02
17.4006	3.0273e-05	N02234	20082452	0.40642	0.45558	-1218.44	0.34885	0.73028	-1209.74	20082452	0.40642	0.34139	-2282.12	0.32263	0.37995	-2281.75	0.30118	0.35259	-2281.79	0.30182	0.33438	0.37713	-2281.64	N02234	20082452	0.40642	0.34384	0.7316	-3491.87	0.34899	0.72997	0.34136	-3491.86
17.3966	3.03368e-05	N00278.N00279	1312175	0.20321	0.13441	-3041.44	0.18461	0.02462	-3032.75	1312175	0.20321	0.15618	-3866.3	0.15618	0.15715	-3866.3	0.13944	0.16106	-3866.14	0.13944	0.16542	0.15403	-3866.12	N00278.N00279	1312175	0.20321	0.16568	0.02594	-6813.27	0.18479	0.02518	0.15635	-6812.8
17.3912	3.04231e-05	H02531	24778097	0.7754	0.73429	-1311.84	0.66158	0.89088	-1303.14	24778097	0.7754	0.74721	-2577.95	0.73668	0.77068	-2577.68	0.80277	0.72979	-2576.5	0.80277	0.69554	0.77978	-2575.23	H02531	24778097	0.7754	0.72125	0.88415	-3751.64	0.66024	0.89625	0.74722	-3748.6
17.375	3.06835e-05	N00714	3830074	0.2246	0.47416	-1753.62	0.58127	0.23328	-1744.93	3830074	0.2246	0.53471	-2389.69	0.51526	0.57407	-2389.38	0.47416	0.55014	-2389.14	0.47455	0.53677	0.56823	-2389.07	N00714	3830074	0.2246	0.55031	0.2246	-4102.79	0.58184	0.21854	0.53471	-4102.33
17.3694	3.07741e-05	N00940	6380340	0.74866	0.71947	-1371.99	0.63577	0.92766	-1363.3	6380340	0.74866	0.66435	-2041.46	0.66187	0.6706	-2041.45	0.65468	0.66581	-2041.44	0.65466	0.66292	0.67004	-2041.44	N00940	6380340	0.74866	0.65508	0.92312	-3404.99	0.63624	0.92685	0.66411	-3404.76
17.3668	3.08162e-05	B00843	5006909	0.52406	0.44137	-1888.73	0.50958	0.26785	-1880.05	5006909	0.52406	0.4901	-2594.99	0.53736	0.39129	-2591.8	0.51641	0.48266	-2594.76	0.51639	0.55152	0.3863	-2591.6	B00843	5006909	0.52406	0.49696	0.27142	-4441.44	0.51037	0.26942	0.49024	-4441.3
17.364	3.08616e-05	M00557	10277638	0.74866	0.82743	-868.091	0.88544	0.67848	-859.409	10277638	0.74866	0.85862	-1705.95	0.8721	0.83278	-1705.41	0.8647	0.85728	-1705.93	0.86495	0.87587	0.83161	-1705.37	M00557	10277638	0.74866	0.86591	0.68208	-2565.93	0.88543	0.6782	0.85867	-2565.36
17.3584	3.09527e-05	D01834.D01835	15837091	0.79144	0.68804	-3001.64	0.6112	0.89521	-2992.96	15837091	0.79144	0.59307	-3899.17	0.50632	0.81363	-3886.78	0.52008	0.61321	-3897.86	0.52032	0.49871	0.81522	-3886.72	D01834.D01835	15837091	0.79144	0.59751	0.91866	-6795.32	0.60695	0.91636	0.59283	-6795.26
17.335	3.13362e-05	N01503	12728867	0.06952	0.41248	-454.743	0.25625	0.97633	-446.075	12728867	0.06952	0.34903	-1033.71	0.3916	0.2471	-1033.11	0.50694	0.30527	-1031.68	0.5074	0.31592	0.29142	-1031.67	N01503	12728867	0.06952	0.32262	0.94107	-1480.48	0.25617	0.97585	0.34912	-1479.78
17.3318	3.1389e-05	C00572	13686201	0.57219	0.68646	-905.479	0.586	0.96161	-896.813	13686201	0.57219	0.63956	-1733.53	0.60708	0.72164	-1732.3	0.62985	0.64194	-1733.51	0.62996	0.59548	0.72669	-1732.17	C00572	13686201	0.57219	0.6242	0.94476	-2631.01	0.58614	0.96105	0.63956	-2630.34
17.3276	3.14584e-05	A00040	176184	0.58289	0.58289	-2128.82	0.66907	0.39481	-2120.16	176184	0.58289	0.56055	-3135.01	0.57024	0.53404	-3134.77	0.62077	0.54029	-3133.76	0.62076	0.53861	0.54316	-3133.75	A00040	176184	0.58289	0.59327	0.41512	-5207.84	0.66887	0.39955	0.56056	-5204.13
17.2998	3.1922e-05	L00216	1650849	0.79144	0.85229	-3946.42	0.78796	0.97407	-3937.77	1650849	0.79144	0.84756	-4156.41	0.87157	0.79158	-4155.05	0.95962	0.819	-4151.08	0.95952	0.82821	0.80297	-4150.97	L00216	1650849	0.79144	0.82671	0.96584	-7917.32	0.78776	0.97109	0.84756	-7915.7
17.2988	3.19388e-05	I00020	176320	0.97326	0.91918	-2169.63	0.98351	0.61374	-2160.98	176320	0.97326	0.97932	-3137.98	0.96772	1	-3136.95	0.82438	0.98533	-3134.7	0.82599	0.97938	1	-3134.04	I00020	176320	0.97326	0.98067	0.60499	-5254.63	0.98359	0.6041	0.97944	-5254.61
17.2976	3.1959e-05	B01476	16642086	0.65241	0.79055	-1856.34	0.70672	0.93538	-1847.69	16642086	0.65241	0.70047	-2603.54	0.7073	0.68091	-2603.42	0.77562	0.67583	-2601.61	0.77603	0.66307	0.69409	-2601.5	B01476	16642086	0.65241	0.70394	0.93465	-4407.04	0.71182	0.9336	0.70044	-4407
17.296	3.19859e-05	F01234	6354527	0.35294	0.68808	-1266.37	0.53476	0.99896	-1257.72	6354527	0.35294	0.71715	-1545.65	0.69969	0.75569	-1545.41	0.74264	0.70935	-1545.5	0.74216	0.66146	0.77304	-1544.82	F01234	6354527	0.35294	0.67427	0.9213	-2474.31	0.53525	0.99994	0.71715	-2469.22
17.289	3.2104e-05	D01488	9109573	0.75401	0.8887	-1364.04	0.84138	0.98779	-1355.39	9109573	0.75401	0.85398	-2105.48	0.84838	0.86721	-2105.34	0.90117	0.84184	-2104.17	0.90117	0.81613	0.87526	-2103.29	D01488	9109573	0.75401	0.85004	0.98672	-3424.24	0.84132	0.98768	0.85394	-3424.14
17.2886	3.21108e-05	H00553.H00554	3267750	0.41711	0.18238	-994.071	0.09332	0.37918	-985.427	3267750	0.41711	0.17938	-1654.31	0.19555	0.15066	-1654	0.26242	0.15723	-1652.08	0.26258	0.14185	0.17688	-1651.92	H00553.H00554	3267750	0.41711	0.15567	0.34629	-2643.05	0.09261	0.37754	0.17943	-2639.73
17.2826	3.22123e-05	L01695.L01696	24952009	0.82888	0.83652	-1273.78	0.95327	0.42031	-1265.14	24952009	0.82888	0.72426	-1653.79	0.73976	0.68423	-1653.68	0.47281	0.76902	-1651.2	0.4727	0.86065	0.63215	-1650.01	L01695.L01696	24952009	0.82888	0.81717	0.44581	-2924.08	0.95352	0.42029	0.72467	-2918.93
17.2766	3.23142e-05	I01200.I01201	15063764	0.29947	0.16328	-1676.85	0.082	0.42448	-1668.21	15063764	0.29947	0.14232	-2643.43	0.14795	0.12615	-2643.34	0.16729	0.1335	-2643.19	0.16726	0.13549	0.1303	-2643.19	I01200.I01201	15063764	0.29947	0.12342	0.39797	-4313.19	0.08163	0.42231	0.1424	-4311.65
17.2748	3.23448e-05	I00232	2840733	0.6738	0.40737	-1020.77	0.48361	0.1433	-1012.14	2840733	0.6738	0.51948	-1703.07	0.54577	0.45297	-1702.65	0.47946	0.52889	-1702.74	0.47945	0.60394	0.39624	-1701.19	I00232	2840733	0.6738	0.50667	0.1348	-2715.6	0.48366	0.14309	0.51924	-2715.21
17.2714	3.24027e-05	C01054.C01055	17188741	0.90374	0.89214	-2010.19	0.84471	1	-2001.55	17188741	0.90374	0.85851	-2968.28	0.8549	0.86681	-2968.23	0.85482	0.85851	-2968.27	0.85487	0.85406	0.86681	-2968.23	C01054.C01055	17188741	0.90374	0.85424	1	-4969.92	0.84453	0.99999	0.8583	-4969.83
17.2492	3.27836e-05	K00149	664283	0.91444	0.92045	-1215.1	0.97206	0.65558	-1206.48	664283	0.91444	0.88944	-1752.39	0.88382	0.90288	-1752.31	0.83298	0.89791	-1751.82	0.83298	0.89866	0.89671	-1751.82	K00149	664283	0.91444	0.91639	0.66566	-2925.88	0.9721	0.64677	0.88919	-2922.33
17.2488	3.27905e-05	D01833	15821599	0.8877	0.73128	-374.965	0.60716	1	-366.341	15821599	0.8877	0.59705	-596.548	0.48679	0.837	-592.827	0.48735	0.61982	-595.785	0.48735	0.48645	0.83717	-592.827	D01833	15821599	0.8877	0.6004	1	-962.899	0.60695	1	0.59673	-962.889
17.2448	3.28596e-05	N00532.N00533	2635282	0.49733	0.70363	-1151.25	0.81485	0.45926	-1142.63	2635282	0.49733	0.66142	-1621.71	0.70456	0.57792	-1620.43	0.68302	0.65573	-1621.63	0.68277	0.71986	0.57012	-1620.31	N00532.N00533	2635282	0.49733	0.70633	0.50658	-2769.82	0.81438	0.45925	0.66114	-2764.34
17.243	3.28907e-05	H02138	20982348	0.84492	0.83891	-2142.35	0.75919	0.99999	-2133.73	20982348	0.84492	0.88107	-3167.76	0.86352	0.91553	-3167.19	0.83137	0.90249	-3166.62	0.83138	0.89342	0.91126	-3166.57	H02138	20982348	0.84492	0.84186	0.99997	-5269.58	0.75889	0.99999	0.88105	-5265.08
17.2384	3.29704e-05	J01067	6742742	0.39037	0.74077	-525.264	0.66267	0.97915	-516.645	6742742	0.39037	0.64126	-1049.07	0.64029	0.6445	-1049.07	0.60277	0.65208	-1048.8	0.60278	0.66319	0.6351	-1048.74	J01067	6742742	0.39037	0.6485	0.9822	-1565.82	0.66211	0.97933	0.64125	-1565.72
17.2336	3.30538e-05	L01610	24591260	0.76471	0.85673	-471.698	0.95079	0.58741	-463.081	24591260	0.76471	0.92272	-916.474	0.93104	0.90332	-916.343	0.93792	0.91829	-916.352	0.93823	0.92648	0.90598	-916.307	L01610	24591260	0.76471	0.93006	0.59721	-1379.94	0.95034	0.58741	0.92272	-1379.56
17.2138	3.34001e-05	E00780.E00781	5332938	0.92513	0.89559	-2720.94	0.95062	0.75568	-2712.33	5332938	0.92513	0.95302	-3621.06	0.95295	0.95302	-3621.06	0.89431	0.9688	-3618.6	0.89411	0.99477	0.93167	-3617.06	E00780.E00781	5332938	0.92513	0.95211	0.7512	-6235.43	0.95017	0.7512	0.95296	-6235.43
17.1946	3.37394e-05	G00435	2801739	0.74866	0.68906	-670.226	0.91464	0.2352	-661.629	2801739	0.74866	0.6757	-1192.22	0.70394	0.61224	-1191.91	0.38114	0.73611	-1186.57	0.38113	0.83436	0.56104	-1184.05	G00435	2801739	0.74866	0.72897	0.32984	-1857.67	0.91202	0.23674	0.67573	-1853.85
17.1932	3.37643e-05	D02344	19630655	0.26203	0.50999	-877	0.41692	0.73751	-868.404	19630655	0.26203	0.42616	-2306.84	0.38166	0.53584	-2302.84	0.4661	0.41386	-2306.32	0.46611	0.33236	0.54571	-2299.89	D02344	19630655	0.26203	0.42403	0.73497	-3175.27	0.41723	0.73725	0.4263	-3175.24
17.1928	3.37714e-05	H02269	22852769	0.83422	0.79783	-3039.78	0.87085	0.6283	-3031.18	22852769	0.83422	0.85435	-3818.36	0.86229	0.83433	-3818.15	0.87537	0.8486	-3818.18	0.87481	0.85954	0.83479	-3818.09	H02269	22852769	0.83422	0.85948	0.62982	-6657.85	0.87107	0.62698	0.85421	-6657.7
17.19	3.38212e-05	F01859	17897829	0.63636	0.67387	-1490.08	0.56388	0.86951	-1481.49	17897829	0.63636	0.59546	-3125.51	0.55392	0.67491	-3124.26	0.59253	0.59616	-3125.51	0.59253	0.52653	0.68097	-3123.94	F01859	17897829	0.63636	0.58562	0.86582	-4607.16	0.5635	0.86936	0.59554	-4607
17.184	3.39282e-05	F01421	11601330	0.41711	0.41928	-781.319	0.54355	0.14212	-772.727	11601330	0.41711	0.50073	-1182.14	0.53273	0.43683	-1181.54	0.55162	0.48738	-1181.77	0.55162	0.52058	0.44183	-1181.47	F01421	11601330	0.41711	0.51319	0.15303	-1955.15	0.54336	0.1414	0.50114	-1954.87
17.183	3.39461e-05	F01135	5517454	0.59358	0.45324	-816.373	0.55573	0.20791	-807.782	5517454	0.59358	0.56994	-1080.14	0.5453	0.61802	-1079.74	0.52388	0.58138	-1079.83	0.52389	0.55851	0.61277	-1079.66	F01135	5517454	0.59358	0.56501	0.20542	-1887.96	0.55602	0.20774	0.5698	-1887.92
17.1796	3.40069e-05	B01096	12260200	0.9893	0.81557	-1909.84	0.8913	0.57881	-1901.25	12260200	0.9893	0.81237	-3328.39	0.82921	0.77319	-3328	0.79049	0.81985	-3328.24	0.79048	0.85975	0.76255	-3327.34	B01096	12260200	0.9893	0.83761	0.58945	-5231.58	0.89027	0.57899	0.81208	-5229.64
17.1766	3.40606e-05	J00638	3605506	0.79144	0.90064	-617.268	0.85567	0.98767	-608.679	3605506	0.79144	0.87471	-955.84	0.87114	0.88352	-955.781	0.91983	0.86461	-954.763	0.91986	0.84042	0.89639	-954.133	J00638	3605506	0.79144	0.86823	0.98705	-1564.77	0.85571	0.98757	0.87457	-1564.52
17.1746	3.40965e-05	H00182	948186	0.65241	0.53113	-752.501	0.7866	0.07199	-743.913	948186	0.65241	0.67126	-1140.23	0.66326	0.69859	-1140.19	0.59692	0.68552	-1140.01	0.59711	0.68706	0.68173	-1140.01	H00182	948186	0.65241	0.69976	0.10147	-1884.78	0.78581	0.07154	0.67136	-1884.14
17.1698	3.41828e-05	D01092	5400582	0.58289	0.7107	-906.269	0.62545	0.87683	-897.684	5400582	0.58289	0.58664	-1668.44	0.54638	0.659	-1666.68	0.48359	0.60801	-1666.14	0.48379	0.57791	0.6466	-1665.64	D01092	5400582	0.58289	0.59818	0.88445	-2566.6	0.62518	0.87698	0.58652	-2566.13
17.1688	3.42008e-05	K00548	2827828	0.90909	0.91591	-1980.35	0.95464	0.62597	-1971.77	2827828	0.90909	0.9282	-2545.51	0.9259	0.93501	-2545.48	0.94226	0.92568	-2545.43	0.94226	0.92008	0.93581	-2545.35	K00548	2827828	0.90909	0.93793	0.63102	-4517.83	0.95464	0.62572	0.92828	-4517.27
17.1626	3.43126e-05	F00784	3766402	0.57754	0.43801	-2251.47	0.57393	0.22925	-2242.89	3766402	0.57754	0.47839	-2899.03	0.49576	0.43372	-2898.74	0.47179	0.48015	-2899.02	0.47179	0.51986	0.42675	-2898.61	F00784	3766402	0.57754	0.50995	0.23749	-5143.09	0.57446	0.2296	0.47848	-5141.91
17.1606	3.43487e-05	K00857	10354121	0.68449	0.8609	-2376.68	0.80587	0.9548	-2368.09	10354121	0.68449	0.86953	-2468.27	0.86069	0.88502	-2467.98	0.87489	0.86853	-2468.25	0.87489	0.85269	0.88603	-2467.82	K00857	10354121	0.68449	0.84949	0.95224	-4703.4	0.80577	0.95667	0.86969	-4700.56
17.1576	3.4403e-05	N02275	20398300	0.59358	0.5965	-635.753	0.70815	0.24225	-627.174	20398300	0.59358	0.67937	-1561.58	0.67377	0.69636	-1561.51	0.65958	0.68476	-1561.5	0.65963	0.67791	0.69461	-1561.47	N02275	20398300	0.59358	0.68609	0.25128	-2188.92	0.70738	0.24272	0.67935	-2188.76
17.155	3.44501e-05	K01356	23551638	0.35829	0.80822	-692.216	0.69999	1	-683.639	23551638	0.35829	0.87	-1137.9	0.87	0.86894	-1137.9	0.99999	0.84892	-1135.39	0.99999	0.82344	0.88539	-1135.1	K01356	23551638	0.35829	0.81831	1	-1826.6	0.69987	1	0.87011	-1821.54
17.1514	3.45155e-05	J00022	122638	0.85561	0.88429	-1530.29	0.94032	0.69672	-1521.71	122638	0.85561	0.88111	-2210.75	0.90007	0.8443	-2210.11	0.89423	0.87838	-2210.69	0.89421	0.9031	0.84293	-2210.09	J00022	122638	0.85561	0.90158	0.70846	-3734.83	0.94	0.69661	0.88101	-3732.46
17.1458	3.46174e-05	L00265	3482741	0.93583	0.85921	-1857.66	0.91141	0.70041	-1849.09	3482741	0.93583	0.86018	-2576.96	0.82988	0.9269	-2574.17	0.78243	0.88127	-2574.21	0.78243	0.85496	0.92179	-2573.06	L00265	3482741	0.93583	0.87817	0.70828	-4428.04	0.91154	0.70016	0.8599	-4426.04
17.135	3.48148e-05	H01143	11234806	0.34759	0.62559	-548.624	0.75641	0.2719	-540.056	11234806	0.34759	0.62078	-900.52	0.5579	0.75082	-897.701	0.56966	0.62991	-900.258	0.56966	0.55343	0.75236	-897.685	H01143	11234806	0.34759	0.65818	0.33167	-1443.67	0.75565	0.27247	0.62079	-1440.58
17.1348	3.48185e-05	D01547	10081835	0.45455	0.20543	-287.015	0.08742	0.66117	-278.448	10081835	0.45455	0.24275	-620.671	0.13711	0.42447	-618.006	0.22206	0.24414	-620.66	0.22206	0.11986	0.43656	-617.718	D01547	10081835	0.45455	0.19118	0.5936	-903.349	0.08759	0.66085	0.24277	-899.119
17.134	3.48331e-05	M01641.M01642.M01643	19432123	0.81818	0.59327	-289.89	0.44708	1	-281.323	19432123	0.81818	0.76209	-567.139	0.76383	0.75392	-567.13	0.64883	0.77501	-566.282	0.64841	0.79704	0.73366	-566.057	M01641.M01642.M01643	19432123	0.81818	0.68814	0.89072	-860.156	0.44706	0.99999	0.76167	-848.462
17.1298	3.49102e-05	H00805	5928888	0.49733	0.55163	-1599.45	0.64914	0.38117	-1590.88	5928888	0.49733	0.54954	-2403.29	0.51333	0.61844	-2401.83	0.52508	0.55708	-2403.11	0.52375	0.50519	0.62115	-2401.78	H00805	5928888	0.49733	0.5801	0.40012	-3997.13	0.64888	0.38156	0.54954	-3994.18
17.1256	3.49875e-05	N02918	24105590	0.74332	0.7577	-2399.93	0.81893	0.60218	-2391.37	24105590	0.74332	0.79286	-2671.74	0.80556	0.76802	-2671.41	0.7473	0.80397	-2670.95	0.74769	0.83864	0.7578	-2669.69	N02918	24105590	0.74332	0.80215	0.59683	-4981.7	0.81903	0.59333	0.79264	-4981.28
17.1096	3.52835e-05	C00605	14005777	0.97326	0.89412	-1342.97	0.95991	0.62074	-1334.42	14005777	0.97326	0.90716	-2425.5	0.90957	0.89966	-2425.49	0.84991	0.91812	-2424.84	0.8499	0.93217	0.89137	-2424.63	C00605	14005777	0.97326	0.92414	0.62965	-3760.99	0.95961	0.62081	0.90693	-3759.92
17.108	3.53132e-05	D00067	309531	0.62032	0.53453	-871.031	0.68938	0.19134	-862.477	309531	0.62032	0.5754	-1898.01	0.54225	0.64919	-1897.29	0.62865	0.56059	-1897.63	0.62869	0.48903	0.66635	-1896.06	D00067	309531	0.62032	0.60492	0.22538	-2762.16	0.6891	0.1916	0.57536	-2760.49
17.0912	3.5627e-05	H02135	20931396	0.79679	0.79819	-2240.9	0.73406	0.91401	-2232.35	20931396	0.79679	0.83957	-3217.68	0.8174	0.8824	-3216.26	0.7868	0.85605	-3215.87	0.7868	0.83983	0.87645	-3215.51	H02135	20931396	0.79679	0.8067	0.90057	-5456.51	0.7341	0.91373	0.83965	-5450.04
17.0894	3.56608e-05	L00902	16840112	0.68449	0.91206	-2242.81	0.87302	1	-2234.26	16840112	0.68449	0.89318	-2857.13	0.88551	0.91139	-2856.89	0.80306	0.9188	-2853.28	0.80325	0.93786	0.89553	-2852.81	L00902	16840112	0.68449	0.88597	1	-5091.65	0.87324	1	0.893	-5091.39
17.0822	3.57962e-05	D01649	13548978	0.25668	0.47536	-1915.05	0.56893	0.29477	-1906.51	13548978	0.25668	0.42485	-2608.32	0.39194	0.49988	-2607.01	0.33405	0.45833	-2605.62	0.3339	0.44215	0.48	-2605.51	D01649	13548978	0.25668	0.4697	0.31518	-4441.31	0.56767	0.29725	0.42499	-4435.71
17.082	3.58e-05	D01965	17171571	0.78075	0.82835	-852.424	0.95356	0.45013	-843.883	17171571	0.78075	0.90285	-1599.32	0.87793	0.95753	-1598.92	0.88578	0.90514	-1599.3	0.88584	0.87483	0.95902	-1598.91	D01965	17171571	0.78075	0.91804	0.46129	-2443.67	0.953	0.45024	0.9025	-2443.21
17.0788	3.58604e-05	F00697	3279727	0.52406	0.57987	-761.339	0.67217	0.28192	-752.8	3279727	0.52406	0.53098	-1280.39	0.56577	0.46351	-1279.68	0.56098	0.5255	-1280.29	0.56084	0.56835	0.46219	-1279.68	F00697	3279727	0.52406	0.57864	0.31427	-2037.45	0.67205	0.28205	0.53099	-2033.19
17.0688	3.60497e-05	L01399	23423237	0.78075	0.84486	-1407.16	0.99996	0.3612	-1398.62	23423237	0.78075	0.80723	-2588.91	0.77306	0.89504	-2588.1	0.79586	0.8104	-2588.89	0.79576	0.76186	0.89825	-2588.03	L01399	23423237	0.78075	0.85168	0.42669	-3991.6	0.99996	0.36094	0.80723	-3987.53
17.0688	3.60497e-05	K01017	14758361	0.87166	0.71497	-707.096	0.81727	0.2976	-698.562	14758361	0.87166	0.821	-1124.62	0.80528	0.85111	-1124.4	0.61341	0.84963	-1120.42	0.6134	0.86175	0.82914	-1120.31	K01017	14758361	0.87166	0.81985	0.28881	-1760.86	0.81758	0.28881	0.82093	-1760.86
17.0578	3.62591e-05	I00932	13693354	0.63636	0.73385	-1990.41	0.62174	0.92819	-1981.88	13693354	0.63636	0.66815	-2530.55	0.62713	0.75237	-2529.4	0.74191	0.6489	-2529.72	0.74189	0.55377	0.78059	-2526.83	I00932	13693354	0.63636	0.65293	0.92131	-4512.84	0.62204	0.92785	0.66832	-4512.44
17.0516	3.63777e-05	K00355	1659919	0.84492	0.70032	-1539.99	0.7675	0.51496	-1531.47	1659919	0.84492	0.75115	-2690.59	0.7549	0.74104	-2690.55	0.73677	0.75576	-2690.5	0.73672	0.76806	0.73709	-2690.33	K00355	1659919	0.84492	0.75615	0.51678	-4222.18	0.76717	0.51497	0.75136	-4222.06
17.0484	3.64391e-05	G00445	2852390	0.87166	0.85815	-1154.75	0.78535	1	-1146.22	2852390	0.87166	0.87745	-1569.64	0.85952	0.91106	-1569.23	0.82185	0.88878	-1569	0.82161	0.87649	0.9055	-1568.89	G00445	2852390	0.87166	0.84348	0.99999	-2718.7	0.78539	1	0.87756	-2715.86
17.0484	3.64391e-05	N00878	5508941	0.35829	0.39905	-1475.57	0.50846	0.20029	-1467.05	5508941	0.35829	0.42289	-2334.39	0.43429	0.39328	-2334.16	0.40301	0.42812	-2334.31	0.40301	0.4589	0.38555	-2333.85	N00878	5508941	0.35829	0.44873	0.21745	-3803.08	0.50835	0.20073	0.42287	-3801.44
17.0476	3.64544e-05	F00457	2108273	0.67914	0.83098	-984.499	0.89997	0.64909	-975.975	2108273	0.67914	0.78992	-1723.57	0.77197	0.82915	-1722.97	0.69934	0.81147	-1721.15	0.69938	0.80819	0.8163	-1721.14	F00457	2108273	0.67914	0.82295	0.67531	-2705.58	0.89993	0.64884	0.78998	-2699.55
17.0436	3.65313e-05	J01797	18809973	0.46524	0.18436	-918.423	0.10004	0.51915	-909.901	18809973	0.46524	0.17722	-1161.21	0.21172	0.11116	-1160.51	0.30816	0.15795	-1159.79	0.30816	0.17835	0.12671	-1159.64	J01797	18809973	0.46524	0.14767	0.49615	-2072.63	0.10019	0.51975	0.17725	-2071.12
17.041	3.65813e-05	E00538	3050321	0.08556	0.17061	-551.609	0.03398	0.51584	-543.089	3050321	0.08556	0.10223	-1076.28	0.07076	0.16659	-1075.4	0.24163	0.08414	-1074.51	0.24163	0.02336	0.18871	-1071.67	E00538	3050321	0.08556	0.08631	0.49018	-1620.48	0.03397	0.51622	0.10222	-1619.37
17.0406	3.6589e-05	K01333	23360376	0.69519	0.88351	-2001.55	0.8311	0.96734	-1993.03	23360376	0.69519	0.84451	-2852.88	0.83344	0.86596	-2852.49	0.82351	0.85096	-2852.61	0.82355	0.83903	0.8653	-2852.41	K01333	23360376	0.69519	0.84034	0.96625	-4775.43	0.83023	0.96723	0.84458	-4775.3
17.0406	3.6589e-05	J00333	1500209	0.80749	0.84754	-538.963	0.93769	0.59429	-530.443	1500209	0.80749	0.87231	-1115.09	0.80601	0.99872	-1109.1	0.71384	0.9054	-1109.2	0.71384	0.85214	0.97998	-1107.04	J00333	1500209	0.80749	0.88997	0.62429	-1647.41	0.93872	0.59683	0.87233	-1645.53
17.0354	3.66894e-05	J00862	5176523	0.8877	0.78828	-937.885	0.71096	0.95149	-929.367	5176523	0.8877	0.8106	-1275.12	0.80446	0.82569	-1275.01	0.9134	0.79032	-1271.95	0.91338	0.74706	0.84519	-1270.63	J00862	5176523	0.8877	0.77831	0.93283	-2208.23	0.71082	0.95134	0.81117	-2204.48
17.0306	3.67822e-05	L00623	8854508	0.8877	0.75837	-1057.62	0.66263	0.95719	-1049.11	8854508	0.8877	0.79888	-1444.96	0.78415	0.82716	-1444.76	0.71536	0.81355	-1444.01	0.71535	0.81042	0.81728	-1444	L00623	8854508	0.8877	0.75412	0.94264	-2498.31	0.66218	0.95709	0.79821	-2494.07
17.0254	3.68831e-05	C01219	18091503	0.71658	0.67799	-2159.26	0.78458	0.4894	-2150.75	18091503	0.71658	0.72369	-2261.44	0.77561	0.59674	-2257.6	0.77201	0.70644	-2260.62	0.77152	0.78037	0.59479	-2257.59	C01219	18091503	0.71658	0.74167	0.51652	-4137.22	0.78546	0.50102	0.72349	-4136.08
17.0238	3.69142e-05	H00239	1334102	0.71658	0.56108	-845.806	0.43781	0.79264	-837.294	1334102	0.71658	0.54839	-1606.02	0.56845	0.50483	-1605.69	0.59751	0.533	-1605.42	0.59749	0.54381	0.51885	-1605.39	H00239	1334102	0.71658	0.51894	0.75767	-2445.89	0.43834	0.7922	0.54814	-2443.31
17.0134	3.71169e-05	D02186.D02187.D02188	18458447	0.19786	0.24735	-1799.85	0.18388	0.39894	-1791.35	18458447	0.19786	0.19129	-2211.59	0.21687	0.14028	-2210.02	0.2447	0.17682	-2210.23	0.2447	0.19966	0.14538	-2209.59	D02186.D02187.D02188	18458447	0.19786	0.18908	0.39318	-3960.94	0.18353	0.39318	0.19151	-3960.9
17.0108	3.71678e-05	H01314	15448233	0.58824	0.5785	-2196.01	0.49509	0.75299	-2187.5	15448233	0.58824	0.55716	-2960.46	0.53588	0.59554	-2959.92	0.51164	0.56879	-2959.94	0.51166	0.54954	0.59208	-2959.73	H01314	15448233	0.58824	0.53868	0.75196	-5016.63	0.49888	0.75831	0.55688	-5015.61
17.0078	3.72266e-05	J00483	2433506	0.49733	0.36148	-3183.42	0.44626	0.15464	-3174.92	2433506	0.49733	0.38269	-4160.9	0.40471	0.32922	-4160.26	0.42724	0.36818	-4160.38	0.4268	0.3907	0.33346	-4160.09	J00483	2433506	0.49733	0.4026	0.16541	-7172.28	0.4452	0.15887	0.38278	-7171.28
17.0034	3.73129e-05	H01557	16705941	0.94118	0.95554	-2707.38	0.99887	0.83742	-2698.88	16705941	0.94118	0.91135	-4050.71	0.92875	0.86795	-4049.41	0.93942	0.9037	-4050.12	0.93937	0.92324	0.86982	-4049.3	H01557	16705941	0.94118	0.93546	0.85277	-6676.38	0.99887	0.83318	0.91117	-6667.9
16.9986	3.74074e-05	D00262.D00263.D00264	1203584	0.64171	0.57913	-4019.08	0.50408	0.70706	-4010.58	1203584	0.64171	0.55157	-4784.67	0.52224	0.61241	-4783.47	0.56182	0.54866	-4784.63	0.56176	0.49492	0.62339	-4782.79	D00262.D00263.D00264	1203584	0.64171	0.53603	0.70919	-8466.48	0.50464	0.71205	0.55149	-8465.62
16.9906	3.75653e-05	E00920	10010795	0.28342	0.23466	-3856.78	0.15608	0.41086	-3848.28	10010795	0.28342	0.19352	-4396.47	0.15434	0.27801	-4394.28	0.18794	0.19521	-4396.46	0.18794	0.13401	0.28434	-4393.82	E00920	10010795	0.28342	0.18097	0.40789	-8127.57	0.15757	0.41216	0.19346	-8127.09
16.9868	3.76406e-05	F01417	11539328	0.64706	0.70352	-1977.84	0.61141	0.86878	-1969.34	11539328	0.64706	0.62423	-2581.46	0.62423	0.62392	-2581.46	0.5346	0.65289	-2579.2	0.5345	0.69335	0.60173	-2578.38	F01417	11539328	0.64706	0.61983	0.86505	-4516.23	0.60971	0.8668	0.62428	-4516.17
16.9868	3.76406e-05	B00934	6481593	0.87166	0.8853	-2232.53	0.8363	0.97412	-2224.03	6481593	0.87166	0.91541	-2982.66	0.92373	0.89955	-2982.27	0.95095	0.90682	-2981.37	0.95117	0.91072	0.90168	-2981.33	B00934	6481593	0.87166	0.89127	0.96767	-5212.24	0.83616	0.97391	0.91524	-5206.7
16.9854	3.76684e-05	N01354.N01355	9721150	0.50267	0.67298	-1680.17	0.59743	0.87542	-1671.67	9721150	0.50267	0.56708	-2577.01	0.576	0.54159	-2576.85	0.51975	0.58118	-2576.48	0.51977	0.61828	0.52711	-2575.76	N01354.N01355	9721150	0.50267	0.57742	0.8768	-4248.94	0.59652	0.87579	0.56709	-4248.69
16.9806	3.77637e-05	H01276	15107776	0.57219	0.67797	-527.789	0.49601	0.96509	-519.299	15107776	0.57219	0.42604	-1246.97	0.39088	0.50459	-1246.43	0.41622	0.42966	-1246.95	0.41623	0.36361	0.52081	-1246.28	H01276	15107776	0.57219	0.44245	0.98147	-1766.74	0.49526	0.96538	0.42611	-1766.27
16.9788	3.77995e-05	L00501	6387714	0.6631	0.79464	-1433.11	0.72458	0.99252	-1424.62	6387714	0.6631	0.73083	-2799.64	0.71777	0.76012	-2799.35	0.7232	0.73371	-2799.62	0.72337	0.71261	0.7622	-2799.33	L00501	6387714	0.6631	0.72892	0.99128	-4224.27	0.72494	0.99308	0.7306	-4224.26
16.9754	3.78673e-05	L01553.L01554	24301395	0.80749	0.83438	-425.672	0.93336	3e-05	-417.184	24301395	0.80749	0.93829	-792.782	0.93415	0.94826	-792.745	0.83341	0.94362	-792.316	0.83341	0.94496	0.94057	-792.312	L01553.L01554	24301395	0.80749	0.93722	0.00037	-1209.97	0.93364	0.00037	0.93835	-1209.97
16.9736	3.79032e-05	N00348	1652606	0.5508	0.27237	-1013.17	0.35198	0.10168	-1004.69	1652606	0.5508	0.37884	-1562.06	0.37614	0.38754	-1562.04	0.3254	0.39085	-1561.46	0.32555	0.40075	0.37518	-1561.41	N00348	1652606	0.5508	0.37031	0.09839	-2566.96	0.3525	0.10166	0.37892	-2566.75
16.9664	3.80472e-05	B00224.B00225	955002	0.28877	0.34919	-1734.49	0.24031	0.54837	-1726	955002	0.28877	0.34985	-2131.6	0.32553	0.40343	-2130.98	0.30235	0.36224	-2131.16	0.30235	0.33842	0.39921	-2130.86	B00224.B00225	955002	0.28877	0.3168	0.52741	-3860.35	0.24051	0.54812	0.34981	-3857.6
16.963	3.81154e-05	K00090	424602	0.85027	0.87476	-1601.64	0.946	0.66957	-1593.16	424602	0.85027	0.88516	-2956.68	0.87788	0.90937	-2956.41	0.92535	0.87016	-2955.68	0.92547	0.84275	0.91589	-2954.67	K00090	424602	0.85027	0.90137	0.68295	-4551.7	0.94597	0.66961	0.88511	-4549.84
16.9612	3.81516e-05	I01044	14348525	0.42781	0.3577	-1683.01	0.438	0.16602	-1674.53	14348525	0.42781	0.46277	-2569.12	0.51368	0.36144	-2566.02	0.52299	0.44912	-2568.42	0.52297	0.51016	0.3623	-2566.01	I01044	14348525	0.42781	0.45472	0.1622	-4243.82	0.43832	0.16584	0.46274	-4243.65
16.9596	3.81837e-05	F01863	17926110	0.5508	0.69204	-345.934	0.60422	0.97184	-337.454	17926110	0.5508	0.66327	-573.054	0.56273	0.8499	-568.921	0.53858	0.68121	-571.885	0.53858	0.57209	0.84455	-568.871	F01863	17926110	0.5508	0.6431	0.96619	-911.146	0.60401	0.97194	0.66332	-910.508
16.959	3.81958e-05	G00799	6611883	0.71658	0.71197	-2341.4	0.78321	0.56551	-2332.92	6611883	0.71658	0.69386	-3332.85	0.66581	0.7557	-3331.43	0.66737	0.7028	-3332.56	0.66742	0.66383	0.75629	-3331.43	G00799	6611883	0.71658	0.72335	0.57326	-5595.54	0.78305	0.55986	0.69413	-5591.91
16.9538	3.83006e-05	H02475.H02476	24509464	0.51337	0.65224	-1262.78	0.76695	0.35032	-1254.3	24509464	0.51337	0.6495	-1948.26	0.64948	0.6495	-1948.26	0.60578	0.65938	-1947.98	0.60578	0.67134	0.64059	-1947.91	H02475.H02476	24509464	0.51337	0.6814	0.38444	-3205.19	0.76668	0.35054	0.64951	-3202.56
16.9528	3.83208e-05	A00390	2016317	0.50267	0.45444	-655.95	0.36241	0.82481	-647.474	2016317	0.50267	0.50497	-1238.26	0.54773	0.41258	-1236.56	0.53849	0.49721	-1238.07	0.5385	0.55311	0.41033	-1236.54	A00390	2016317	0.50267	0.46166	0.77717	-1851.36	0.36357	0.83132	0.50498	-1846.85
16.9526	3.83248e-05	I00334	5631298	0.33155	0.62252	-1120.3	0.52209	0.88012	-1111.83	5631298	0.33155	0.57194	-1450.93	0.58069	0.54661	-1450.82	0.65204	0.55072	-1449.94	0.65204	0.54461	0.55994	-1449.93	I00334	5631298	0.33155	0.55512	0.88369	-2519.67	0.51952	0.89231	0.57185	-2519.17
16.9512	3.83531e-05	B00808.B00809	4803765	0.89305	0.80386	-4417.95	0.86742	0.66949	-4409.48	4803765	0.89305	0.83696	-5209.64	0.85277	0.79913	-5208.78	0.81385	0.84341	-5209.35	0.81385	0.87564	0.79418	-5207.65	B00808.B00809	4803765	0.89305	0.84654	0.66859	-9510.6	0.86784	0.66441	0.83657	-9509.98
16.9508	3.83612e-05	H00345	2054612	0.73262	0.27505	-459.164	0.09922	0.96547	-450.689	2054612	0.73262	0.24912	-975.22	0.24042	0.27826	-975.162	0.17994	0.26851	-974.827	0.17989	0.27206	0.26254	-974.824	H00345	2054612	0.73262	0.21186	0.91462	-1427.7	0.09945	0.96568	0.24869	-1425.91
16.9476	3.84259e-05	L01150.L01151	21946679	0.34225	0.24731	-1080.98	0.1723	0.46779	-1072.5	21946679	0.34225	0.26771	-1965.41	0.23205	0.34635	-1963.24	0.19828	0.28605	-1963.81	0.19818	0.2502	0.34033	-1962.75	L01150.L01151	21946679	0.34225	0.23941	0.44982	-3001.34	0.17107	0.47261	0.26774	-2997.68
16.9474	3.84299e-05	H01636	17109380	0.57219	0.67977	-1291.15	0.58533	0.90486	-1282.68	17109380	0.57219	0.6144	-2320.19	0.60446	0.64371	-2319.97	0.59405	0.61944	-2320.11	0.59405	0.60461	0.64371	-2319.95	H01636	17109380	0.57219	0.60623	0.90014	-3603.06	0.58595	0.9047	0.61453	-3602.86
16.9438	3.85029e-05	F01533	14754976	0.7754	0.72337	-2829.86	0.79661	0.46996	-2821.39	14754976	0.7754	0.70816	-3822.25	0.73643	0.65266	-3821.43	0.68138	0.71352	-3822.14	0.68139	0.75998	0.64611	-3820.86	F01533	14754976	0.7754	0.73952	0.48081	-6645.87	0.79621	0.47008	0.70793	-6643.64
16.9394	3.85922e-05	K00121.K00122.K00123	561515	0.70053	0.80546	-6780.75	0.73205	0.9293	-6772.28	561515	0.70053	0.7267	-5817.25	0.7684	0.64755	-5814.81	0.72016	0.72874	-5817.24	0.72019	0.80082	0.64079	-5813.84	K00121.K00122.K00123	561515	0.70053	0.73275	0.92119	-11682.2	0.74442	0.9197	0.72668	-11682.1
16.9352	3.86777e-05	M01280.M01281	17757247	0.17112	0.14191	-2424.91	0.19357	0.03812	-2416.45	17757247	0.17112	0.14507	-3106.02	0.14388	0.14834	-3106.02	0.14653	0.14476	-3106.02	0.1465	0.14149	0.14923	-3106.01	M01280.M01281	17757247	0.17112	0.16109	0.04623	-5484.88	0.19359	0.04051	0.14506	-5483.21
16.935	3.86818e-05	B00528.B00529	2538382	0.78075	0.40218	-1276.16	0.51195	0.13127	-1267.69	2538382	0.78075	0.45982	-1860.97	0.46454	0.44799	-1860.94	0.31239	0.49791	-1858.02	0.31245	0.55641	0.41781	-1856.92	B00528.B00529	2538382	0.78075	0.4763	0.13907	-3129.1	0.51146	0.13184	0.45985	-3128.66
16.9338	3.87062e-05	F00810.F00811	3926008	0.95722	0.62002	-242.069	0.76107	0.01789	-233.602	3926008	0.95722	0.76278	-654.43	0.81503	0.65757	-653.481	0.48587	0.79535	-651.832	0.48586	0.89449	0.62682	-649.31	F00810.F00811	3926008	0.95722	0.76244	0.01699	-888.032	0.76116	0.01767	0.76279	-888.032
16.9256	3.88738e-05	I00152	1518459	0.52941	0.63664	-1115.36	0.54629	0.87327	-1106.9	1518459	0.52941	0.63648	-2463.32	0.6527	0.60252	-2462.98	0.64048	0.63544	-2463.31	0.64041	0.65909	0.60077	-2462.94	I00152	1518459	0.52941	0.61054	0.85544	-3572.27	0.54617	0.87297	0.63648	-3570.22
16.9106	3.91822e-05	L01152	21951034	0.76471	0.7248	-2498.8	0.66143	0.8542	-2490.35	21951034	0.76471	0.67013	-4277.87	0.664	0.68591	-4277.74	0.64288	0.67835	-4277.52	0.64292	0.67459	0.68366	-4277.5	L01152	21951034	0.76471	0.6676	0.85315	-6768.25	0.6612	0.85315	0.66985	-6768.22
16.9078	3.924e-05	E01397	17099408	0.70588	0.69592	-2061	0.77912	0.54748	-2052.54	17099408	0.70588	0.8069	-2684.77	0.81128	0.79646	-2684.7	0.76805	0.8168	-2684.15	0.76805	0.83935	0.78762	-2683.63	E01397	17099408	0.70588	0.79893	0.54517	-4656.57	0.77912	0.54996	0.80689	-4656.2
16.895	3.95055e-05	B01706	18009111	0.86631	0.38185	-183.527	0.5294	0	-175.08	18009111	0.86631	0.73854	-335.562	0.72314	0.77087	-335.398	0.48595	0.78435	-329.672	0.48594	0.81991	0.7279	-329.114	B01706	18009111	0.86631	0.68834	0	-515.825	0.52945	0	0.73843	-510.642
16.8916	3.95763e-05	F00884.F00885	4247908	0.64171	0.61329	-3208.74	0.68823	0.47131	-3200.3	4247908	0.64171	0.58496	-3921.19	0.57462	0.61065	-3920.92	0.52923	0.59854	-3920.32	0.52922	0.59341	0.60561	-3920.3	F00884.F00885	4247908	0.64171	0.61859	0.49039	-6967.02	0.68548	0.48127	0.58493	-6962.98
16.8882	3.96473e-05	L00177	1303321	0.44385	0.39807	-1592.06	0.32025	0.65667	-1583.62	1303321	0.44385	0.38059	-1792.3	0.35484	0.43062	-1791.88	0.37431	0.3819	-1792.3	0.37431	0.34492	0.43541	-1791.81	L00177	1303321	0.44385	0.35652	0.64804	-3376.84	0.32025	0.65646	0.38057	-3375.92
16.8864	3.96849e-05	A00725	4035700	0.93048	0.82443	-2184.46	0.9139	0.65964	-2176.02	4035700	0.93048	0.94554	-3012.37	0.94935	0.93419	-3012.3	0.97632	0.93624	-3011.83	0.97614	0.93538	0.93732	-3011.83	A00725	4035700	0.93048	0.93771	0.65698	-5188.78	0.91369	0.65933	0.94546	-5188.39
16.8842	3.97309e-05	D02194.D02195	18502598	0.77005	0.64696	-2337.15	0.72921	0.45679	-2328.71	18502598	0.77005	0.69542	-2652.66	0.69715	0.69071	-2652.65	0.66032	0.70553	-2652.33	0.66032	0.72094	0.68336	-2652.17	D02194.D02195	18502598	0.77005	0.70671	0.45785	-4947.64	0.7299	0.45256	0.69522	-4947.25
16.8762	3.98987e-05	D01215	6296944	0.8984	0.68252	-1767.72	0.81194	0.23023	-1759.28	6296944	0.8984	0.70221	-2356.44	0.76145	0.57089	-2355.24	0.47209	0.74982	-2353.46	0.47207	0.89035	0.51782	-2349.27	D01215	6296944	0.8984	0.74127	0.25351	-4116.97	0.81158	0.23118	0.70129	-4115.72
16.8754	3.99156e-05	C01366.C01367	18696024	0.32086	0.20695	-1625.07	0.1162	0.37224	-1616.64	18696024	0.32086	0.19192	-2437.37	0.19397	0.18558	-2437.36	0.14017	0.20745	-2436.21	0.1405	0.23519	0.16946	-2435.65	C01366.C01367	18696024	0.32086	0.17131	0.35025	-4056.45	0.1162	0.37237	0.19176	-4054.01
16.8662	4.01095e-05	M01307	17855283	0.16043	0.12283	-1662.62	0.17227	0.0308	-1654.19	17855283	0.16043	0.11895	-1864.91	0.13929	0.07876	-1863.48	0.14355	0.11157	-1864.45	0.14355	0.13748	0.07939	-1863.47	M01307	17855283	0.16043	0.13695	0.03532	-3391.25	0.1727	0.03003	0.11893	-3389
16.8652	4.01306e-05	B00699.B00700	3705133	0.43316	0.70599	-3061.32	0.63218	0.85133	-3052.89	3705133	0.43316	0.74152	-3775.62	0.74765	0.72868	-3775.55	0.82884	0.7187	-3773.32	0.82847	0.70002	0.74006	-3773.11	B00699.B00700	3705133	0.43316	0.70446	0.85543	-6783.94	0.63383	0.85996	0.74145	-6779.97
16.8488	4.04789e-05	J00120	533231	0.41711	0.70841	-148.702	0.86856	0.03319	-140.277	533231	0.41711	0.76745	-206.112	0.70025	0.90833	-205.168	0.68067	0.78458	-205.814	0.6805	0.70933	0.90373	-205.151	J00120	533231	0.41711	0.79972	0.06196	-347.144	0.86852	0.03367	0.76706	-346.389
16.8438	4.05857e-05	A01157	11435412	0.93583	0.89251	-3453.77	0.94141	0.80157	-3445.35	11435412	0.93583	0.9473	-4071.61	0.93405	0.97226	-4070.19	0.96051	0.94312	-4071.3	0.96046	0.91695	0.97444	-4068.93	A01157	11435412	0.93583	0.94531	0.80104	-7517.01	0.94153	0.80104	0.94729	-7516.96
16.843	4.06028e-05	B00836	4967930	0.55615	0.74681	-1286.54	0.67689	0.91585	-1278.12	4967930	0.55615	0.69835	-1828.26	0.69521	0.70788	-1828.24	0.73328	0.69169	-1828.04	0.73298	0.67566	0.71775	-1827.89	B00836	4967930	0.55615	0.69086	0.91344	-3106.54	0.67679	0.91606	0.69829	-3106.38
16.8328	4.08216e-05	D00907	4395834	0.45455	0.19517	-1081.18	0.11443	0.38971	-1072.76	4395834	0.45455	0.25747	-1614.66	0.22506	0.32556	-1613.44	0.14284	0.28458	-1611.89	0.14284	0.26529	0.31326	-1611.66	D00907	4395834	0.45455	0.20945	0.36265	-2694.25	0.11438	0.38901	0.25752	-2687.43
16.831	4.08604e-05	M01396	18207358	0.41176	0.44217	-1378.25	0.331	0.82086	-1369.84	18207358	0.41176	0.45056	-1886.35	0.45056	0.44865	-1886.35	0.49334	0.44054	-1886.23	0.49334	0.43184	0.4546	-1886.22	M01396	18207358	0.41176	0.4014	0.8071	-3257.83	0.33111	0.82037	0.45065	-3256.19
16.8264	4.09595e-05	C01156	17742521	0.31016	0.18343	-550.371	0.07015	0.41162	-541.958	17742521	0.31016	0.25385	-1597.55	0.28434	0.18188	-1596.38	0.37224	0.22319	-1594.38	0.37202	0.23554	0.20448	-1594.3	C01156	17742521	0.31016	0.21306	0.32364	-2148.62	0.0699	0.40945	0.25399	-2139.5
16.8222	4.10503e-05	B00771	4526859	0.28342	0.38246	-1601.78	0.48205	0.15252	-1593.36	4526859	0.28342	0.45537	-2305.22	0.43044	0.50527	-2304.74	0.40548	0.46897	-2304.8	0.40544	0.44433	0.5003	-2304.61	B00771	4526859	0.28342	0.46463	0.15217	-3859.81	0.4821	0.14719	0.45553	-3859.65
16.8188	4.11239e-05	F00594.F00595	2767866	0.65775	0.68175	-764.244	0.82865	0.25015	-755.835	2767866	0.65775	0.63634	-1672.53	0.64159	0.62259	-1672.51	0.58922	0.64386	-1672.4	0.58912	0.67017	0.60667	-1672.26	F00594.F00595	2767866	0.65775	0.69058	0.33637	-2433.11	0.82837	0.2507	0.63634	-2428.37
16.802	4.14896e-05	N00380.N00381	1826129	0.79144	0.8706	-1674.83	0.94859	0.65518	-1666.43	1826129	0.79144	0.88271	-2622.01	0.86616	0.9204	-2621.45	0.88603	0.88218	-2622.01	0.88591	0.85806	0.92335	-2621.32	N00380.N00381	1826129	0.79144	0.9006	0.67333	-4290.53	0.94873	0.65508	0.88279	-4288.44
16.7842	4.18806e-05	D00832	4026172	0.82353	0.4726	-651.075	0.61643	0.03385	-642.683	4026172	0.82353	0.43938	-1257.25	0.47809	0.36035	-1256.57	0.43675	0.44067	-1257.25	0.43677	0.5089	0.34813	-1256.3	D00832	4026172	0.82353	0.49018	0.09897	-1903.32	0.61584	0.03422	0.43985	-1899.94
16.7782	4.20132e-05	E00062.E00063	324414	0.89305	0.86402	-1742.57	0.79772	0.9795	-1734.18	324414	0.89305	0.84903	-2894.94	0.87076	0.80575	-2894.04	0.88107	0.83968	-2894.47	0.88088	0.86468	0.80821	-2893.97	E00062.E00063	324414	0.89305	0.83328	0.97657	-4597.19	0.79613	0.97916	0.84921	-4596.03
16.775	4.20841e-05	J01649	17962043	0.8877	0.94189	-1589.87	0.98927	0.77845	-1581.48	17962043	0.8877	0.91465	-2184.42	0.90275	0.94016	-2184.13	0.87883	0.92415	-2183.92	0.87879	0.91683	0.93524	-2183.87	J01649	17962043	0.8877	0.94279	0.79835	-3770.99	0.98928	0.77855	0.91461	-3765.91
16.7422	4.28179e-05	H01496	16344982	0.60428	0.7587	-2152.52	0.69622	0.91706	-2144.14	16344982	0.60428	0.74675	-3298.06	0.71811	0.80939	-3296.5	0.73566	0.74952	-3298.01	0.73621	0.70707	0.81303	-3296.35	H01496	16344982	0.60428	0.73016	0.91134	-5443.27	0.69591	0.91739	0.74679	-5442.2
16.742	4.28224e-05	L02034	26535319	0.3262	0.72288	-184.223	0.81906	0.11603	-175.852	26535319	0.3262	0.66944	-280.402	0.65613	0.69332	-280.356	0.52067	0.68841	-279.484	0.52067	0.70368	0.66527	-279.442	L02034	26535319	0.3262	0.72621	0.18262	-459.624	0.81905	0.11621	0.66914	-456.254
16.7374	4.29264e-05	F00260	1236864	0.25668	0.20097	-1439.14	0.11142	0.41591	-1430.77	1236864	0.25668	0.23033	-2337.1	0.25531	0.17175	-2336.05	0.22706	0.23126	-2337.1	0.22697	0.27232	0.16747	-2335.75	F00260	1236864	0.25668	0.19873	0.38089	-3772.66	0.1114	0.4164	0.23022	-3767.88
16.7216	4.32854e-05	H00931	6891954	0.73797	0.76695	-575.15	0.86845	0.44584	-566.79	6891954	0.73797	0.71675	-1510.76	0.73989	0.65811	-1510.18	0.68923	0.72534	-1510.6	0.68926	0.77094	0.64583	-1509.48	H00931	6891954	0.73797	0.76301	0.52265	-2083.51	0.86811	0.44644	0.71674	-2077.55
16.7062	4.36382e-05	N00701	3734796	0.12299	0.10116	-1594.66	0.14836	0	-1586.3	3734796	0.12299	0.11218	-1953.3	0.09154	0.15533	-1952.32	0.07097	0.12215	-1952.43	0.07119	0.10266	0.14941	-1952.03	N00701	3734796	0.12299	0.12432	0	-3484.08	0.14916	0	0.1122	-3483.29
16.7034	4.37026e-05	J01710.J01711	18307205	0.91979	0.85091	-1803.13	0.90797	0.658	-1794.78	18307205	0.91979	0.83396	-2678.62	0.84068	0.81297	-2678.42	0.85756	0.82695	-2678.36	0.85749	0.83474	0.81468	-2678.29	J01710.J01711	18307205	0.91979	0.85794	0.67308	-4476.68	0.90781	0.65787	0.83394	-4473.39
16.6938	4.39243e-05	D01666	13835892	0.49733	0.68377	-1438.99	0.59654	0.88356	-1430.64	13835892	0.49733	0.662	-2217.86	0.62405	0.73534	-2216.73	0.60841	0.67227	-2217.49	0.60936	0.62921	0.73334	-2216.7	D01666	13835892	0.49733	0.63916	0.87574	-3649.51	0.59603	0.88323	0.662	-3648.5
16.6768	4.43197e-05	N01644	14334512	0.27807	0.35105	-779.525	0.44803	0.06141	-771.187	14334512	0.27807	0.43598	-1104	0.43277	0.4446	-1103.99	0.40012	0.44448	-1103.84	0.4	0.44801	0.43946	-1103.84	N01644	14334512	0.27807	0.44012	0.06352	-1875.22	0.44779	0.06124	0.43603	-1875.19
16.6768	4.43197e-05	F00812	3931774	0.96257	0.88571	-1901.08	0.93359	0.606	-1892.74	3931774	0.96257	0.92046	-2537.13	0.91572	0.94057	-2537.01	0.88449	0.92915	-2536.74	0.88429	0.92626	0.93649	-2536.73	F00812	3931774	0.96257	0.92613	0.60869	-4429.97	0.93372	0.606	0.92041	-4429.87
16.6736	4.43945e-05	H01621	17037127	0.51337	0.32468	-1126.16	0.4376	0.0524	-1117.83	17037127	0.51337	0.40141	-2146.52	0.37994	0.4503	-2146.15	0.2897	0.43471	-2144.49	0.28968	0.43623	0.43156	-2144.49	H01621	17037127	0.51337	0.4126	0.05943	-3264.56	0.43713	0.0527	0.40131	-3264.34
16.6716	4.44414e-05	N02803.N02804	23461546	0.82888	0.54608	-680.478	0.71765	0.03977	-672.142	23461546	0.82888	0.64888	-1323.65	0.7653	0.38456	-1320.96	0.43964	0.6989	-1321.85	0.43964	0.94861	0.30647	-1315.35	N02803.N02804	23461546	0.82888	0.67187	0.04955	-1996.08	0.71745	0.03993	0.64831	-1995.8
16.662	4.46668e-05	I01086	14562916	0.60963	0.57447	-686.848	0.70417	0.19279	-678.517	14562916	0.60963	0.58689	-978.16	0.60892	0.53656	-977.914	0.67592	0.56953	-977.585	0.67575	0.58284	0.54612	-977.534	I01086	14562916	0.60963	0.62676	0.23302	-1622.2	0.70397	0.19597	0.58689	-1620.43
16.6584	4.47517e-05	C00003	200573	0.37433	0.22173	-943.773	0.34483	0	-935.444	200573	0.37433	0.23961	-1556.87	0.22138	0.27852	-1556.68	0	0.29943	-1545.94	0	0.35799	0.21061	-1545.01	C00003	200573	0.37433	0.27261	1e-05	-2494	0.34489	1e-05	0.23963	-2492.32
16.6526	4.48887e-05	D00843	4103387	0.79144	0.8945	-368.522	1	0.59666	-360.196	4103387	0.79144	0.91329	-570.202	0.88162	0.97996	-569.451	0.90205	0.91655	-570.172	0.90198	0.86642	0.98837	-569.341	D00843	4103387	0.79144	0.93754	0.64261	-933.675	1	0.59651	0.91329	-930.398
16.6522	4.48982e-05	J00852	5125344	0.94652	0.60856	-524.575	0.42107	0.99999	-516.249	5125344	0.94652	0.5986	-1264.89	0.63191	0.52715	-1264.53	0.71184	0.57405	-1264.06	0.71196	0.59143	0.54744	-1264.02	J00852	5125344	0.94652	0.5564	0.99997	-1783.44	0.42103	0.99999	0.5984	-1781.14
16.6438	4.50975e-05	B00685	3548773	0.24599	0.21199	-1962.18	0.27533	0.09517	-1953.86	3548773	0.24599	0.20687	-2915.49	0.23461	0.15711	-2913.7	0.23139	0.20009	-2915.18	0.23139	0.23637	0.15664	-2913.69	B00685	3548773	0.24599	0.22778	0.10275	-4820.84	0.27557	0.09598	0.20676	-4818.37
16.6338	4.53359e-05	F02072	19102044	0.67914	0.67311	-3805.88	0.73811	0.55604	-3797.56	19102044	0.67914	0.66709	-4248.48	0.67636	0.64592	-4248.21	0.64386	0.67348	-4248.26	0.64386	0.6973	0.6417	-4247.61	F02072	19102044	0.67914	0.69101	0.56046	-7998.3	0.73831	0.55593	0.66703	-7995.59
16.631	4.54028e-05	G00853	7777814	0.54545	0.92241	-384.982	1	0.7056	-376.667	7777814	0.54545	0.92501	-755.01	0.90552	0.95677	-754.733	0.87504	0.93206	-754.63	0.87515	0.91865	0.94883	-754.566	G00853	7777814	0.54545	0.94887	0.7333	-1134.98	0.99999	0.70524	0.92501	-1131.68
16.631	4.54028e-05	H01766	17860182	0.26203	0.47249	-265.947	0.67568	0	-257.632	17860182	0.26203	0.33352	-768.416	0.28738	0.40513	-768.199	0.29301	0.33881	-768.387	0.29427	0.28361	0.40513	-768.197	H01766	17860182	0.26203	0.43147	0	-1030.16	0.67575	0	0.33399	-1026.05
16.6294	4.54412e-05	H01220	14448527	0.78075	0.84009	-1518.23	0.77027	0.97632	-1509.92	14448527	0.78075	0.74594	-2825.82	0.74731	0.74188	-2825.82	0.74182	0.74687	-2825.82	0.74181	0.75045	0.74097	-2825.81	H01220	14448527	0.78075	0.75365	0.97712	-4302.55	0.76948	0.97605	0.74551	-4302.38
16.6282	4.54699e-05	N01515	13105290	0.63636	0.50739	-1580.25	0.60254	0.15575	-1571.94	13105290	0.63636	0.54652	-2504.88	0.539	0.56694	-2504.8	0.51554	0.55453	-2504.74	0.51549	0.54781	0.56431	-2504.72	N01515	13105290	0.63636	0.56391	0.16746	-4077.39	0.60203	0.15605	0.54657	-4076.82
16.626	4.55227e-05	F01764	17236625	0.64706	0.74364	-2748.09	0.68388	0.84922	-2739.77	17236625	0.64706	0.73285	-3109.76	0.70976	0.7814	-3108.41	0.72159	0.73631	-3109.69	0.72187	0.70161	0.78365	-3108.31	F01764	17236625	0.64706	0.71676	0.85029	-5810.27	0.68331	0.85322	0.73287	-5808.93
16.6236	4.55803e-05	L01049	20937477	0.2139	0.54507	-1604.56	0.45173	0.75019	-1596.25	20937477	0.2139	0.44952	-2782.39	0.45083	0.44718	-2782.39	0.39782	0.46279	-2781.88	0.39773	0.47827	0.43904	-2781.74	L01049	20937477	0.2139	0.45058	0.75025	-4378.64	0.45058	0.75024	0.4501	-4378.64
16.6226	4.56044e-05	A00643	3506738	0.59358	0.77863	-887.514	0.68253	0.96082	-879.203	3506738	0.59358	0.67033	-1516.53	0.70513	0.60456	-1515.82	0.7234	0.66014	-1516.18	0.72293	0.69586	0.60934	-1515.76	A00643	3506738	0.59358	0.67424	0.96165	-2395.76	0.68216	0.96065	0.67031	-2395.73
16.613	4.58358e-05	B00399	1852457	0.72193	0.86966	-1770.24	0.93767	0.68256	-1761.94	1852457	0.72193	0.90705	-2288.62	0.91738	0.88373	-2288.39	0.93213	0.89935	-2288.32	0.93205	0.90816	0.8859	-2288.25	B00399	1852457	0.72193	0.91781	0.68422	-3999.74	0.93751	0.67835	0.90664	-3999.2
16.608	4.59568e-05	J00326	1474913	0.96257	0.64881	-488.74	0.84865	0.20241	-480.436	1474913	0.96257	1	-854.277	1	1	-854.277	0.63945	1	-850.136	0.63944	1	1	-850.136	J00326	1474913	0.96257	0.99999	0.15926	-1336.6	0.84923	0.20207	0.99999	-1334.71
16.5892	4.64146e-05	G00292	1828125	0.64706	0.51994	-720.931	0.60872	0.27329	-712.636	1828125	0.64706	0.60732	-1432	0.60886	0.6016	-1432	0.5322	0.63025	-1430.54	0.53156	0.65959	0.58578	-1430.02	G00292	1828125	0.64706	0.6075	0.27376	-2144.64	0.60862	0.27362	0.60696	-2144.64
16.5802	4.66354e-05	B01403	16135121	0.79679	0.67461	-624.672	0.82541	0.06916	-616.382	16135121	0.79679	0.80889	-1229.59	0.80889	0.80691	-1229.59	0.71603	0.82203	-1229.05	0.71608	0.83758	0.79282	-1228.95	B01403	16135121	0.79679	0.81245	0.0775	-1846	0.82477	0.07085	0.80901	-1845.97
16.5792	4.666e-05	H01932	18778476	0.75401	0.8756	-570.614	0.81532	1	-562.325	18778476	0.75401	0.81343	-842.23	0.82593	0.78678	-842.062	0.8235	0.81115	-842.209	0.82359	0.82756	0.78585	-842.06	H01932	18778476	0.75401	0.81416	1	-1404.56	0.81535	1	0.81341	-1404.55
16.5742	4.67831e-05	B00341.B00342.B00343.B00344	1587705	0.59358	0.59165	-4504.38	0.51922	0.7313	-4496.1	1587705	0.59358	0.58611	-5596.52	0.5258	0.71397	-5589.02	0.54055	0.60009	-5595.76	0.54055	0.51705	0.71558	-5588.92	B00341.B00342.B00343.B00344	1587705	0.59358	0.56402	0.74721	-9717.19	0.51896	0.753	0.58611	-9715.42
16.5686	4.69215e-05	K00976	14011345	0.61497	0.60196	-1464.52	0.71623	0.38599	-1456.23	14011345	0.61497	0.62957	-2347.3	0.5997	0.68955	-2346.38	0.54624	0.65389	-2345.69	0.54621	0.63581	0.67771	-2345.54	K00976	14011345	0.61497	0.65316	0.40809	-3805.24	0.71593	0.38567	0.62941	-3803.53
16.5654	4.70007e-05	M00548	9961519	0.06417	0.10073	-728.323	0.15056	0.0048	-720.04	9961519	0.06417	0.09971	-1341.11	0.0994	0.10144	-1341.11	0.07669	0.10731	-1340.52	0.07669	0.11965	0.08978	-1340.34	M00548	9961519	0.06417	0.11486	0.01342	-2063.25	0.15041	0.00504	0.09971	-2061.15
16.5562	4.72293e-05	B01800.B01801	18464667	0.38503	0.53464	-3341.23	0.46293	0.68017	-3332.95	18464667	0.38503	0.52852	-4019.21	0.50465	0.57798	-4018.18	0.54985	0.52282	-4019.07	0.54963	0.48055	0.58287	-4017.41	B01800.B01801	18464667	0.38503	0.5073	0.67222	-7225.89	0.4656	0.67794	0.52846	-7224.34
16.5514	4.7349e-05	B00713	3858111	0.18182	0.07256	-631.555	0.02351	0.23053	-623.28	3858111	0.18182	0.05486	-1488.74	0.06569	0.02843	-1487.95	0.06587	0.05111	-1488.56	0.06601	0.06559	0.02843	-1487.95	B00713	3858111	0.18182	0.04668	0.2196	-2113.52	0.02348	0.23053	0.05483	-2112.02
16.5446	4.75191e-05	L01195	22242718	0.93583	0.768	-1431.86	0.84703	0.54227	-1423.59	22242718	0.93583	0.78798	-2019.04	0.80362	0.75571	-2018.75	0.79117	0.78759	-2019.04	0.79108	0.80839	0.75374	-2018.71	L01195	22242718	0.93583	0.80804	0.55659	-3443.89	0.84711	0.54223	0.7877	-3442.62
16.5416	4.75943e-05	M01209	17449111	0.61497	0.62605	-2031.89	0.55488	0.74009	-2023.62	17449111	0.61497	0.53876	-2944.13	0.51377	0.58807	-2942.97	0.54461	0.53696	-2944.12	0.54457	0.49318	0.59346	-2942.48	M01209	17449111	0.61497	0.54387	0.74077	-4967.86	0.55477	0.73971	0.53868	-4967.75
16.53	4.78864e-05	D02200.D02201	18541579	0.78075	0.82696	-1692.17	0.89954	0.68747	-1683.9	18541579	0.78075	0.85713	-2074.9	0.85785	0.85567	-2074.89	0.93661	0.83523	-2071.2	0.93674	0.80237	0.87782	-2070.28	D02200.D02201	18541579	0.78075	0.8703	0.69827	-3759.94	0.89943	0.68724	0.85715	-3758.8
16.5268	4.79673e-05	E01317	16576501	0.60428	0.7822	-2978.93	0.7102	0.94345	-2970.66	16576501	0.60428	0.7091	-4469.87	0.7091	0.70984	-4469.87	0.74704	0.69546	-4469.33	0.74703	0.67828	0.72088	-4469.16	E01317	16576501	0.60428	0.71021	0.93903	-7403.15	0.71021	0.93903	0.7091	-7403.15
16.5202	4.81345e-05	N00054	242046	0.71658	0.6501	-583.916	0.74824	0.32536	-575.656	242046	0.71658	0.80597	-891.292	0.78719	0.84317	-891.051	0.81962	0.80294	-891.26	0.81959	0.76644	0.85367	-890.822	N00054	242046	0.71658	0.78681	0.3126	-1467.7	0.74837	0.32496	0.80591	-1466.95
16.5202	4.81345e-05	E01148	14422422	0.72193	0.82026	-1065.71	0.90501	0.53141	-1057.45	14422422	0.72193	0.83434	-1767.77	0.86772	0.74934	-1766.45	0.84238	0.83235	-1767.76	0.84243	0.886	0.73879	-1766.17	E01148	14422422	0.72193	0.85605	0.55931	-2826.97	0.90514	0.53173	0.83431	-2825.23
16.5178	4.81955e-05	J01042	6527094	0.57219	0.65103	-401.305	0.53944	0.99306	-393.046	6527094	0.57219	0.56621	-502.498	0.59242	0.50994	-502.187	0.61836	0.55092	-502.2	0.61836	0.57475	0.51793	-502.091	J01042	6527094	0.57219	0.5564	0.9857	-895.644	0.5392	0.99363	0.56613	-895.545
16.5124	4.83329e-05	L00135	960516	0.85561	0.90089	-629.92	0.84575	1	-621.664	960516	0.85561	0.88035	-1167.35	0.8703	0.90258	-1167.2	0.93911	0.86544	-1165.83	0.9388	0.82677	0.92514	-1164.74	L00135	960516	0.85561	0.87035	1	-1789.49	0.84574	1	0.88023	-1789.01
16.5122	4.8338e-05	J00163	741701	0.56684	0.70867	-850.2	0.59177	1	-841.944	741701	0.56684	0.58249	-1365.74	0.63035	0.48725	-1364.94	0.71321	0.55861	-1364.7	0.71321	0.59447	0.50383	-1364.43	J00163	741701	0.56684	0.58548	0.99999	-2207.69	0.59174	1	0.58246	-2207.68
16.5064	4.84861e-05	C00427	10477302	0.63636	0.58097	-1242.52	0.67636	0.38853	-1234.27	10477302	0.63636	0.55525	-2144.82	0.55924	0.54505	-2144.79	0.58993	0.54557	-2144.5	0.58993	0.5422	0.54979	-2144.5	C00427	10477302	0.63636	0.59013	0.41176	-3383.13	0.67623	0.38863	0.55531	-3379.09
16.5048	4.85271e-05	E00329	1796578	0.62032	0.66893	-2820.08	0.58344	0.81794	-2811.83	1796578	0.62032	0.59641	-3705.06	0.59068	0.61032	-3705	0.62004	0.58962	-3704.92	0.61993	0.57041	0.61725	-3704.69	E00329	1796578	0.62032	0.5918	0.81607	-6516.94	0.58321	0.81745	0.59603	-6516.89
16.5006	4.86347e-05	F00049.F00050	243993	0.87166	0.92503	-3356.43	0.98781	0.80482	-3348.18	243993	0.87166	0.91434	-4281.87	0.93096	0.87993	-4281.16	0.96046	0.9054	-4281.08	0.96046	0.92046	0.88361	-4280.78	F00049.F00050	243993	0.87166	0.93675	0.82618	-7548.41	0.98709	0.81186	0.91459	-7544.56
16.4976	4.87117e-05	K01395	23768387	0.36364	0.27908	-3791.99	0.3451	0.14589	-3783.74	23768387	0.36364	0.28276	-4368.23	0.29292	0.2603	-4367.97	0.24762	0.29294	-4367.78	0.24762	0.32145	0.25592	-4367	K01395	23768387	0.36364	0.30375	0.14969	-8121.73	0.34519	0.14696	0.28319	-8120.16
16.4908	4.88867e-05	I01008	14110821	0.87166	0.76202	-1631.13	0.86771	0.52353	-1622.88	14110821	0.87166	0.8592	-2942.4	0.85624	0.86886	-2942.37	0.8955	0.84792	-2941.84	0.89545	0.83301	0.87497	-2941.57	I01008	14110821	0.87166	0.86106	0.52679	-4565.31	0.86736	0.52375	0.85918	-4565.29
16.4896	4.89177e-05	N00428	2084917	0.28342	0.33605	-2334.42	0.25375	0.53192	-2326.17	2084917	0.28342	0.32868	-3244.85	0.32155	0.34753	-3244.73	0.30907	0.33608	-3244.72	0.30909	0.328	0.34604	-3244.68	N00428	2084917	0.28342	0.30512	0.52298	-5514.89	0.25417	0.53166	0.3281	-5513.18
16.4892	4.8928e-05	B01036	10644317	0.31551	0.44539	-904.053	0.55762	0.11659	-895.808	10644317	0.31551	0.40162	-1557.79	0.4041	0.3945	-1557.78	0.27076	0.42672	-1556.11	0.27084	0.46357	0.37101	-1555.66	B01036	10644317	0.31551	0.45117	0.15069	-2457.3	0.55727	0.117	0.40152	-2453.6
16.4874	4.89745e-05	L01417.L01418.L01419	23542690	0.36364	0.35105	-4302.16	0.4351	0.18279	-4293.91	23542690	0.36364	0.32196	-5163.71	0.32803	0.30563	-5163.63	0.30658	0.32621	-5163.65	0.30655	0.34186	0.30237	-5163.46	L01417.L01418.L01419	23542690	0.36364	0.35919	0.18058	-9218.89	0.43498	0.17054	0.32198	-9215.34
16.4834	4.90779e-05	G00873	7913936	0.64171	0.66296	-4234.76	0.75799	0.50476	-4226.52	7913936	0.64171	0.68803	-4460.59	0.65181	0.75929	-4459.28	0.61448	0.70934	-4459.42	0.61442	0.67614	0.7525	-4458.91	G00873	7913936	0.64171	0.71038	0.49932	-8513.3	0.75444	0.49631	0.68802	-8512.16
16.482	4.91141e-05	I00884	13374771	0.96257	0.88814	-2743.14	0.95327	0.75932	-2734.9	13374771	0.96257	0.86852	-3583.36	0.87362	0.85277	-3583.24	0.84421	0.87366	-3583.15	0.84384	0.88975	0.84735	-3582.78	I00884	13374771	0.96257	0.89363	0.7672	-6207.95	0.95368	0.75664	0.86799	-6203.77
16.4806	4.91504e-05	N01458.N01459	12134225	0.94652	0.83831	-2541.73	0.90992	0.66894	-2533.49	12134225	0.94652	0.83482	-3163.5	0.87255	0.74844	-3161.19	0.84579	0.83085	-3163.45	0.84596	0.89317	0.7401	-3160.77	N01458.N01459	12134225	0.94652	0.86088	0.68645	-5699.64	0.90982	0.66889	0.83432	-5696.99
16.4776	4.92283e-05	E00334.E00335	1827481	0.85561	0.2653	-427.8	0.41037	0	-419.561	1827481	0.85561	0.47982	-1362.85	0.57512	0.26224	-1359.16	0.53692	0.46706	-1362.62	0.53692	0.59241	0.25529	-1359.04	E00334.E00335	1827481	0.85561	0.46394	0	-1782.77	0.41013	0	0.47964	-1782.41
16.47	4.9426e-05	B00043	207495	0.07487	0.12008	-1161.54	0.04248	0.5006	-1153.3	207495	0.07487	0.19607	-2019.72	0.19398	0.20255	-2019.71	0.29037	0.18107	-2018.9	0.29036	0.16338	0.21357	-2018.72	B00043	207495	0.07487	0.15381	0.47151	-3177.79	0.0418	0.50053	0.19627	-3173.02
16.4696	4.94364e-05	D01638	13367407	0.8877	0.72491	-1958.69	0.80838	0.53331	-1950.46	13367407	0.8877	0.7969	-1889.04	0.7818	0.82518	-1888.74	0.7589	0.80446	-1888.71	0.75912	0.79135	0.8223	-1888.6	D01638	13367407	0.8877	0.80008	0.52953	-3727.79	0.80716	0.52619	0.79666	-3727.74
16.4688	4.94573e-05	M00819	15454842	0.84492	0.89474	-2225.14	0.84559	0.99999	-2216.91	15454842	0.84492	0.85636	-2855.51	0.81789	0.92924	-2851.97	0.89396	0.84586	-2854.83	0.89396	0.77386	0.93579	-2849.01	M00819	15454842	0.84492	0.85272	0.99998	-5072.48	0.84549	0.99998	0.85616	-5072.42
16.4586	4.97241e-05	F01593	15765628	0.70053	0.65137	-757.468	0.75854	0.2801	-749.239	15765628	0.70053	0.67712	-1514.88	0.67116	0.69486	-1514.82	0.61646	0.69341	-1514.24	0.61646	0.70113	0.6822	-1514.21	F01593	15765628	0.70053	0.69951	0.31118	-2219.6	0.75814	0.28151	0.67713	-2218.31
16.457	4.97661e-05	J00956.J00957	5713226	0.21925	0.29842	-4004.96	0.38401	0.08423	-3996.73	5713226	0.21925	0.30706	-5184.42	0.35831	0.1715	-5180.8	0.3041	0.30798	-5184.42	0.30405	0.38952	0.1635	-5180.01	J00956.J00957	5713226	0.21925	0.33258	0.09531	-9182.61	0.38457	0.08536	0.3069	-9181.15
16.4568	4.97713e-05	E01218	15314559	0.63102	0.70295	-818.545	0.79821	0.48395	-810.317	15314559	0.63102	0.74891	-1357.69	0.78292	0.67325	-1356.26	0.77163	0.74043	-1357.51	0.77127	0.79401	0.66846	-1356.18	E01218	15314559	0.63102	0.76343	0.49541	-2168.71	0.79809	0.48415	0.74874	-2168.01
16.4472	5.0024e-05	D01920.D01921	16886067	0.95722	0.95611	-5536.05	0.98885	0.89986	-5527.83	16886067	0.95722	0.94182	-5633.52	0.93976	0.94551	-5633.49	0.9535	0.93861	-5633.35	0.95336	0.93289	0.94638	-5633.21	D01920.D01921	16886067	0.95722	0.95546	0.91374	-10409.2	0.98259	0.90796	0.94138	-10405.3
16.4462	5.00504e-05	M01251	17635912	0.58824	0.48182	-321.972	0.32852	0.9784	-313.749	17635912	0.58824	0.56477	-1096.85	0.5281	0.66108	-1096.04	0.46654	0.59192	-1095.8	0.46654	0.56266	0.64565	-1095.55	M01251	17635912	0.58824	0.50949	0.91438	-1415.61	0.32883	0.97766	0.56477	-1410.6
16.444	5.01085e-05	C01172	17815499	0.54011	0.59807	-1859.68	0.5345	0.77548	-1851.46	17815499	0.54011	0.5124	-2539.73	0.50779	0.52356	-2539.68	0.44539	0.52817	-2538.58	0.4454	0.53883	0.51382	-2538.5	C01172	17815499	0.54011	0.52019	0.77743	-4391.37	0.53427	0.77513	0.51232	-4391.19
16.4434	5.01244e-05	H00349.H00350	2080903	0.75936	0.73297	-5546.83	0.79895	0.62732	-5538.61	2080903	0.75936	0.72539	-6052.15	0.74595	0.68305	-6051.16	0.73956	0.72074	-6052.06	0.73912	0.74997	0.68212	-6051.14	H00349.H00350	2080903	0.75936	0.7493	0.62758	-11215.4	0.79731	0.62303	0.72481	-11212.4
16.4404	5.02038e-05	J00085.J00086	391764	0.81283	0.82971	-5594.3	0.78223	0.97414	-5586.08	391764	0.81283	0.79814	-6574.16	0.76745	0.8741	-6571.2	0.79695	0.79814	-6574.16	0.7975	0.75104	0.87661	-6570.76	J00085.J00086	391764	0.81283	0.79362	0.97198	-11749	0.7844	0.97261	0.79801	-11748.9
16.4386	5.02515e-05	F01144.F01145	5561333	0.6631	0.60352	-737.661	0.72645	0.02428	-729.441	5561333	0.6631	0.58461	-1876.45	0.58416	0.58688	-1876.45	0.49725	0.61098	-1875.54	0.49692	0.63561	0.56251	-1875.35	F01144.F01145	5561333	0.6631	0.62245	0.07782	-2608.13	0.72625	0.02411	0.58467	-2605.89
16.433	5.04001e-05	J00609.J00610	3407710	0.46524	0.35124	-1515.13	0.43073	0.18579	-1506.91	3407710	0.46524	0.44162	-2468.63	0.48071	0.36937	-2466.64	0.41994	0.44641	-2468.52	0.41994	0.50916	0.36308	-2465.67	J00609.J00610	3407710	0.46524	0.43825	0.18413	-3975.58	0.43117	0.1856	0.4416	-3975.54
16.4324	5.04161e-05	D01542	9997217	0.87166	0.72109	-324.403	0.81062	0.41092	-316.187	9997217	0.87166	0.8205	-476.662	0.81636	0.83032	-476.616	0.69695	0.83902	-474.102	0.69695	0.8513	0.82021	-473.928	D01542	9997217	0.87166	0.81781	0.40757	-792.88	0.81074	0.41084	0.82039	-792.848
16.43	5.048e-05	A00579	3083246	0.72727	0.65469	-449.986	0.8926	0.27703	-441.772	3083246	0.72727	0.66967	-955.006	0.67718	0.64093	-954.925	0.67549	0.66775	-955.001	0.67535	0.68789	0.63432	-954.903	A00579	3083246	0.72727	0.70764	0.40372	-1401.34	0.89259	0.27707	0.6693	-1396.78
16.4286	5.05173e-05	B01816	18548289	0.83957	0.57569	-287.447	0.40691	0.9754	-279.232	18548289	0.83957	0.61118	-584.019	0.59371	0.64685	-583.926	0.51874	0.63341	-583.495	0.51858	0.63634	0.62879	-583.493	B01816	18548289	0.83957	0.54722	0.92786	-866.481	0.40737	0.97539	0.61124	-863.251
16.4242	5.06346e-05	K01128	18065137	0.90374	0.63265	-268.745	0.83191	0.15134	-260.533	18065137	0.90374	0.62262	-467.152	0.67904	0.51574	-466.627	0.47977	0.64959	-466.281	0.47977	0.7887	0.44884	-464.442	K01128	18065137	0.90374	0.68361	0.21063	-730.541	0.8316	0.15146	0.62274	-727.685
16.422	5.06934e-05	I00823	12997889	0.40642	0.76975	-1688.91	0.67536	0.99999	-1680.7	12997889	0.40642	0.74495	-2878.21	0.7465	0.74132	-2878.21	0.80682	0.72937	-2877.67	0.80685	0.71413	0.74989	-2877.59	I00823	12997889	0.40642	0.72005	0.99999	-4524.22	0.67067	0.99999	0.74496	-4523.27
16.4072	5.10908e-05	L01200	22265347	0.79144	0.84195	-1999.93	0.92142	0.6761	-1991.72	22265347	0.79144	0.83712	-2544.5	0.82352	0.86372	-2544.21	0.84122	0.83636	-2544.5	0.84063	0.81204	0.86706	-2544.08	L01200	22265347	0.79144	0.86265	0.69076	-4539.18	0.92151	0.67588	0.83733	-4536.23
16.4068	5.11016e-05	B00984	7877714	0.67914	0.56211	-320.184	0.72686	0.09754	-311.981	7877714	0.67914	0.70527	-640.514	0.76029	0.60325	-639.288	0.77152	0.69389	-640.125	0.77152	0.75439	0.60651	-639.271	B00984	7877714	0.67914	0.71094	0.11029	-952.557	0.72502	0.09915	0.70525	-952.495
16.3974	5.13556e-05	D01318	7649067	0.93583	0.84562	-4263.12	0.80391	0.99943	-4254.93	7649067	0.93583	0.87525	-5034.15	0.83858	0.95199	-5029.15	0.86293	0.87788	-5034.07	0.86375	0.82514	0.95441	-5028.75	D01318	7649067	0.93583	0.85163	0.99574	-9191.71	0.80384	0.99737	0.87493	-9188.5
16.3968	5.13719e-05	M00076	418661	0.74866	0.78806	-1972.71	0.73498	0.92353	-1964.51	418661	0.74866	0.76922	-2792.07	0.77638	0.75282	-2791.89	0.83024	0.75345	-2790.39	0.83033	0.7494	0.75801	-2790.37	M00076	418661	0.74866	0.75763	0.92022	-4757.23	0.73482	0.92351	0.76914	-4756.59
16.3898	5.1562e-05	L00512.L00513	6623352	0.86096	0.85318	-1319.67	0.902	0.67103	-1311.47	6623352	0.86096	0.85824	-1664.59	0.87342	0.82955	-1664.13	0.88301	0.85242	-1664.33	0.88301	0.86804	0.8324	-1664.09	L00512.L00513	6623352	0.86096	0.87443	0.68178	-2977.53	0.90214	0.67085	0.85813	-2976.06
16.3808	5.18074e-05	M00462	6978232	0.82353	0.85313	-2690.6	0.90675	0.72078	-2682.41	6978232	0.82353	0.80794	-3412.24	0.82088	0.77668	-3411.74	0.79631	0.81183	-3412.17	0.79658	0.83814	0.77176	-3411.25	M00462	6978232	0.82353	0.84017	0.72458	-6053.51	0.90933	0.70823	0.80796	-6046.29
16.372	5.20485e-05	F00783	3760420	0.94118	0.87362	-1876.38	0.92727	0.60762	-1868.19	3760420	0.94118	0.8904	-2149.86	0.88709	0.90493	-2149.81	0.83592	0.899	-2149.33	0.83592	0.899	0.899	-2149.33	F00783	3760420	0.94118	0.90497	0.60737	-3981.67	0.92738	0.59939	0.89039	-3980.95
16.3682	5.21529e-05	L01896.L01897	25852310	0.91979	0.89156	-3812.26	0.93875	0.81085	-3804.08	25852310	0.91979	0.87354	-3982.26	0.86629	0.89167	-3981.94	0.85714	0.87857	-3982.04	0.85726	0.86945	0.89101	-3981.88	L01896.L01897	25852310	0.91979	0.89501	0.81916	-7655.66	0.93862	0.81473	0.8735	-7650.89
16.3666	5.2197e-05	A00063.A00064	251330	0.95722	0.90415	-1669.95	0.97923	0.67284	-1661.77	251330	0.95722	0.87803	-2142.51	0.93187	0.78833	-2139.95	0.91852	0.86989	-2142.25	0.91874	0.93665	0.78648	-2139.92	A00063.A00064	251330	0.95722	0.91198	0.67702	-3769.33	0.97951	0.65639	0.8778	-3765.63
16.3584	5.24233e-05	A01082	8707895	0.64171	0.62631	-2343.44	0.69417	0.47724	-2335.26	8707895	0.64171	0.65732	-3247.05	0.65638	0.65931	-3247.05	0.65016	0.65926	-3247.03	0.65016	0.65984	0.65833	-3247.03	A01082	8707895	0.64171	0.66972	0.48016	-5582.91	0.69383	0.47743	0.65712	-5582.31
16.3538	5.25507e-05	I00568	11345793	0.44385	0.22825	-807.145	0.3492	0	-798.968	11345793	0.44385	0.26249	-1260.81	0.26616	0.25021	-1260.79	0.14767	0.29397	-1258.5	0.14761	0.35038	0.20381	-1257.54	I00568	11345793	0.44385	0.28876	0.01167	-2061.06	0.3493	1e-05	0.26238	-2059.78
16.3446	5.28064e-05	I00748.I00749	12573849	0.73797	0.90167	-1876.1	0.85588	0.9789	-1867.93	12573849	0.73797	0.87663	-2561.62	0.86404	0.90082	-2561.22	0.97524	0.85274	-2555.11	0.97524	0.80345	0.91743	-2552.27	I00748.I00749	12573849	0.73797	0.86925	0.97769	-4429.85	0.85544	0.97889	0.87649	-4429.55
16.3398	5.29403e-05	M01409	18250674	0.55615	0.68138	-417.72	0.81115	0.45663	-409.55	18250674	0.55615	0.74792	-529.858	0.76643	0.70691	-529.644	0.84288	0.72428	-528.281	0.84254	0.71483	0.74172	-528.24	M01409	18250674	0.55615	0.76634	0.47553	-940.24	0.81091	0.45669	0.74761	-939.408
16.3388	5.29683e-05	I00173	1883515	0.31016	0.22877	-1771	0.28836	0.09695	-1762.83	1883515	0.31016	0.30386	-2338.63	0.33015	0.25242	-2337.6	0.29953	0.30495	-2338.62	0.29945	0.34959	0.24619	-2337.21	I00173	1883515	0.31016	0.2987	0.08647	-4055.29	0.28855	0.08788	0.304	-4055.19
16.3266	5.33104e-05	M01165.M01166	17235607	0.87166	0.8639	-2878.69	0.91891	0.68773	-2870.53	17235607	0.87166	0.87817	-3589.19	0.88215	0.86814	-3589.14	0.89727	0.87416	-3589.07	0.89743	0.8776	0.86886	-3589.06	M01165.M01166	17235607	0.87166	0.89267	0.70057	-6422.58	0.919	0.69464	0.87796	-6421.59
16.3066	5.3876e-05	K00425.K00426.K00427	2054894	0.51872	0.51641	-4102.06	0.61221	0.35905	-4093.9	2054894	0.51872	0.51872	-5113.28	0.54482	0.46428	-5112.37	0.59505	0.49465	-5111.58	0.59484	0.51044	0.47262	-5111.42	K00425.K00426.K00427	2054894	0.51872	0.54639	0.36794	-8929.37	0.60957	0.35529	0.51876	-8927.05
16.2914	5.43099e-05	D01859	16019148	0.85027	0.82483	-2023.39	0.73842	0.95826	-2015.25	16019148	0.85027	0.84337	-2604.49	0.82052	0.88998	-2603.48	0.8112	0.85251	-2604.08	0.8112	0.82629	0.88835	-2603.45	D01859	16019148	0.85027	0.81252	0.93556	-4623.81	0.73891	0.95788	0.84335	-4619.73
16.284	5.45224e-05	I00166	1849115	0.62032	0.53698	-1483.86	0.64252	0.2517	-1475.71	1849115	0.62032	0.55574	-2626.21	0.59463	0.47957	-2625.18	0.54272	0.55795	-2626.19	0.54266	0.61627	0.47133	-2624.83	I00166	1849115	0.62032	0.5819	0.26737	-4103.3	0.64281	0.2519	0.55565	-4101.92
16.2792	5.46607e-05	M00402	6500970	0.66845	0.52896	-426.358	0.40757	0.93807	-418.218	6500970	0.66845	0.61724	-1052.75	0.57752	0.69843	-1052	0.59799	0.6204	-1052.72	0.59793	0.56782	0.70304	-1051.96	M00402	6500970	0.66845	0.55375	0.8669	-1476.72	0.40804	0.93765	0.61669	-1470.97
16.2726	5.48514e-05	F01519	14393889	0.39037	0.33343	-1343.91	0.24498	0.55357	-1335.77	14393889	0.39037	0.35836	-1696.32	0.33455	0.40894	-1695.87	0.3062	0.37074	-1695.8	0.30638	0.35174	0.39917	-1695.67	F01519	14393889	0.39037	0.32014	0.53349	-2976.07	0.24431	0.56223	0.35815	-2972.44
16.272	5.48688e-05	A00350	1786856	0.70053	0.7471	-2388.8	0.82295	0.54923	-2380.67	1786856	0.70053	0.7321	-3801.85	0.76984	0.64292	-3800.23	0.73829	0.72927	-3801.83	0.73829	0.80344	0.62283	-3799.61	A00350	1786856	0.70053	0.76107	0.54535	-6032.46	0.82183	0.52877	0.73202	-6029.56
16.2686	5.49673e-05	G00138	858176	0.63102	0.23716	-939.448	0.14218	0.41754	-931.314	858176	0.63102	0.22198	-1416.95	0.21845	0.23419	-1416.91	0.19073	0.23078	-1416.62	0.19074	0.23364	0.22579	-1416.61	G00138	858176	0.63102	0.20039	0.39361	-2350.55	0.14233	0.41724	0.22218	-2348.26
16.268	5.49847e-05	N02775	23273980	0.62032	0.72811	-847.247	0.8057	0.49061	-839.113	23273980	0.62032	0.7902	-1076.56	0.84626	0.67194	-1072.59	0.81175	0.78543	-1076.44	0.81175	0.86557	0.66214	-1072.09	N02775	23273980	0.62032	0.79497	0.49355	-1915.77	0.80573	0.49053	0.79022	-1915.67
16.2618	5.5165e-05	F00086	435464	0.71658	0.19103	-200.453	0	0.88179	-192.322	435464	0.71658	0.37898	-503.065	0.4639	0.17911	-501.874	0.54968	0.34847	-502.345	0.54953	0.43171	0.19533	-501.651	F00086	435464	0.71658	0.26489	0.76332	-702.097	0	0.88145	0.37866	-695.387
16.2546	5.5375e-05	H02341	23554214	0.8877	0.69962	-1992.22	0.87723	0.28258	-1984.09	23554214	0.8877	0.83209	-2911.24	0.81839	0.87549	-2911.07	0.85119	0.82328	-2911.19	0.85119	0.77927	0.88828	-2910.8	H02341	23554214	0.8877	0.84319	0.30209	-4864.36	0.8741	0.28982	0.83143	-4864.18
16.2456	5.56387e-05	L00906	16912661	0.03209	0.18695	-565.611	3e-05	0.71707	-557.488	16912661	0.03209	0.23438	-718.967	0.16938	0.35967	-718.376	0.46022	0.20303	-717.643	0.46022	0.07107	0.41735	-715.911	L00906	16912661	0.03209	0.16126	0.66389	-1279.42	5e-05	0.71637	0.23442	-1276.46
16.2456	5.56387e-05	N00776	4424532	0.73262	0.71231	-266.889	0.7864	0.24363	-258.766	4424532	0.73262	0.73479	-446.113	0.75234	0.69152	-445.843	0.73463	0.73479	-446.113	0.73443	0.76412	0.68616	-445.765	N00776	4424532	0.73262	0.75308	0.26175	-705.525	0.7865	0.24365	0.73452	-704.879
16.2438	5.56915e-05	C01307.C01308	18449908	0.5615	0.28755	-1589.64	0.20908	0.47009	-1581.52	18449908	0.5615	0.33884	-2206.25	0.33378	0.35356	-2206.19	0.31231	0.34522	-2206.09	0.3125	0.34074	0.35127	-2206.08	C01307.C01308	18449908	0.5615	0.29567	0.44352	-3793.78	0.2091	0.47035	0.33913	-3787.77
16.2364	5.59095e-05	M01950.M01951.M01952	20879476	0.90374	0.87172	-4766.85	0.92364	0.7549	-4758.73	20879476	0.90374	0.91578	-5809	0.90409	0.94498	-5808.26	0.89887	0.92012	-5808.8	0.89931	0.90617	0.94466	-5808.24	M01950.M01951.M01952	20879476	0.90374	0.91813	0.75369	-10518.7	0.92302	0.75302	0.91569	-10518.6
16.23	5.60987e-05	L02042	26571944	0.70588	0.87782	-462.974	0.82617	0.99596	-454.859	26571944	0.70588	0.89766	-1031.22	0.89506	0.907	-1031.15	0.92614	0.88645	-1030.23	0.92593	0.86418	0.92041	-1029.49	L02042	26571944	0.70588	0.87715	0.98512	-1489.59	0.82636	0.99585	0.89759	-1486.08
16.2272	5.61817e-05	N02419.N02420	21369997	0.72727	0.67649	-1766.72	0.75754	0.46417	-1758.6	21369997	0.72727	0.70567	-2914.36	0.67581	0.76739	-2912.93	0.63868	0.72305	-2913.12	0.63867	0.69555	0.76255	-2912.48	N02419.N02420	21369997	0.72727	0.72164	0.4769	-4673.89	0.75717	0.46434	0.70566	-4672.96
16.2158	5.65207e-05	D01909	16756962	0.97861	0.92918	-2931.88	0.96768	0.78589	-2923.77	16756962	0.97861	0.91747	-4169.25	0.89543	0.96738	-4167.47	0.88658	0.92559	-4168.61	0.88658	0.90088	0.96538	-4167.42	D01909	16756962	0.97861	0.9346	0.79359	-7041.69	0.96795	0.7829	0.91707	-7038.64
16.21	5.66941e-05	M00871	15798970	0.39037	0.65372	-895.075	0.57526	0.89507	-886.97	15798970	0.39037	0.60656	-1627.72	0.63224	0.55655	-1627.18	0.66632	0.59245	-1627.13	0.66632	0.61344	0.56313	-1626.94	M00871	15798970	0.39037	0.59556	0.89007	-2514.93	0.57565	0.8946	0.60678	-2514.69
16.2086	5.6736e-05	D02144	18161944	0.83422	0.65358	-950.708	0.85766	0.1651	-942.604	18161944	0.83422	0.66927	-1430.1	0.77499	0.44849	-1427.57	0.80256	0.64	-1429.37	0.80256	0.7641	0.45221	-1427.54	D02144	18161944	0.83422	0.72505	0.20613	-2374.77	0.85744	0.16654	0.66886	-2372.71
16.1954	5.71327e-05	I00311	4198413	0.7754	0.85404	-2435.45	0.91216	0.65254	-2427.36	4198413	0.7754	0.79661	-2561.65	0.79043	0.81421	-2561.56	0.76853	0.80211	-2561.49	0.76816	0.79579	0.81171	-2561.47	I00311	4198413	0.7754	0.8393	0.67388	-4995.04	0.91236	0.65278	0.79645	-4989
16.1764	5.77086e-05	I00336	5897784	0.62032	0.56197	-2092.19	0.48037	0.7892	-2084.11	5897784	0.62032	0.52129	-2741.52	0.54317	0.48222	-2741.1	0.51056	0.52359	-2741.5	0.51056	0.55809	0.4789	-2740.91	I00336	5897784	0.62032	0.50763	0.78154	-4699.06	0.48241	0.78488	0.5212	-4698.7
16.1726	5.78245e-05	B00353	1636919	0.51337	0.63483	-1054.51	0.54169	0.84052	-1046.43	1636919	0.51337	0.63944	-1652.48	0.65827	0.60472	-1652.13	0.75756	0.61604	-1649.84	0.75743	0.61262	0.62112	-1649.84	B00353	1636919	0.51337	0.61072	0.82028	-2701.35	0.54175	0.84057	0.6394	-2698.91
16.131	5.91086e-05	E00725	4558753	0.86096	0.79473	-1251.93	0.72702	0.97481	-1243.86	4558753	0.86096	0.76544	-1549.84	0.76084	0.77876	-1549.79	0.71639	0.78064	-1549.14	0.71641	0.79114	0.76447	-1549.07	E00725	4558753	0.86096	0.75183	0.96923	-2794.18	0.7266	0.97471	0.76509	-2793.7
16.12	5.94529e-05	N02962	24315020	0.93048	0.93283	-2909.43	0.89315	0.99825	-2901.37	24315020	0.93048	0.93395	-3746.92	0.90769	0.97869	-3742.6	0.89529	0.9459	-3745.27	0.89529	0.91546	0.97807	-3742.43	N02962	24315020	0.93048	0.92156	0.99767	-6545.97	0.89351	0.9983	0.93358	-6544.35
16.1154	5.95974e-05	D00990	4874625	0.40642	0.39077	-1701.08	0.49127	0.21416	-1693.02	4874625	0.40642	0.41805	-2530.94	0.44516	0.36333	-2530.32	0.45669	0.40876	-2530.7	0.45669	0.43871	0.36564	-2530.29	D00990	4874625	0.40642	0.44132	0.22159	-4225.09	0.49039	0.21442	0.41814	-4223.96
16.1126	5.96856e-05	A00521	2720612	0.24599	0.14829	-1346.95	0.08634	0.41155	-1338.89	2720612	0.24599	0.12875	-2031.42	0.12325	0.14512	-2031.29	0.1145	0.13263	-2031.33	0.11363	0.12474	0.14472	-2031.26	A00521	2720612	0.24599	0.11648	0.3973	-3371.28	0.08609	0.41085	0.12875	-3370.31
16.11	5.97676e-05	L01601	24548178	0.50802	0.29596	-1003.06	0.40279	0	-995.002	24548178	0.50802	0.42593	-1731.42	0.36307	0.54976	-1729.28	0.11677	0.4784	-1721.69	0.11689	0.46224	0.50039	-1721.63	L01601	24548178	0.50802	0.41939	0	-2726.5	0.40283	0	0.42634	-2726.42
16.1068	5.98687e-05	C00880	16134823	0.70588	0.47224	-395.671	0.62808	0.1484	-387.618	16134823	0.70588	0.49061	-593.75	0.47639	0.52133	-593.671	0.45381	0.49933	-593.63	0.4538	0.48755	0.51503	-593.614	C00880	16134823	0.70588	0.53062	0.19094	-983.464	0.62754	0.14852	0.49078	-981.368
16.0964	6.01984e-05	L01888	25812333	0.96791	0.86699	-982.032	0.93041	0.63964	-973.984	25812333	0.96791	0.92333	-2235.16	0.93727	0.88156	-2234.19	0.94739	0.91425	-2234.44	0.94739	0.92926	0.88593	-2234	L01888	25812333	0.96791	0.92509	0.64214	-3209.18	0.92999	0.6398	0.92349	-3209.14
16.0884	6.04532e-05	H01939	18828035	0.61497	0.62598	-3123.92	0.55231	0.74781	-3115.87	18828035	0.61497	0.63887	-3863.38	0.62751	0.66428	-3863.01	0.65615	0.63444	-3863.28	0.65611	0.60609	0.66882	-3862.53	H01939	18828035	0.61497	0.6123	0.72786	-6843.9	0.55359	0.73824	0.63887	-6840.69
16.08	6.0722e-05	A00590	3150597	0.72193	0.6098	-4840	0.68601	0.48193	-4831.96	3150597	0.72193	0.67008	-6340.56	0.67071	0.66758	-6340.56	0.68464	0.665	-6340.46	0.68464	0.66224	0.66953	-6340.45	A00590	3150597	0.72193	0.67654	0.48673	-10819.7	0.69009	0.48533	0.66982	-10819.5
16.0772	6.08118e-05	I00129	1131542	0.7754	0.83231	-2387.19	0.73823	0.99996	-2379.15	1131542	0.7754	0.78658	-3645	0.80788	0.74348	-3644.56	0.78363	0.78703	-3644.99	0.78363	0.82074	0.73985	-3644.43	I00129	1131542	0.7754	0.77135	0.99985	-5989.66	0.73796	0.99996	0.78667	-5989.15
16.0664	6.11596e-05	J00988	6134632	0.87701	0.88018	-1786.7	0.83241	0.98021	-1778.66	6134632	0.87701	0.83276	-2370.92	0.76289	0.94792	-2363.79	0.75911	0.84857	-2369.35	0.75942	0.76429	0.94747	-2363.79	J00988	6134632	0.87701	0.83271	0.97999	-4149.59	0.83268	0.97999	0.83271	-4149.59
16.0602	6.13602e-05	M01822	20287295	0.94652	0.8641	-2611.72	0.91876	0.76393	-2603.69	20287295	0.94652	0.836	-3105.51	0.87648	0.76087	-3101.42	0.86026	0.82875	-3105.17	0.86026	0.8878	0.75727	-3101.17	M01822	20287295	0.94652	0.86315	0.77261	-5714.65	0.91868	0.76356	0.83581	-5709.2
16.0574	6.1451e-05	B01450	16437111	0.79679	0.5203	-1614.53	0.36124	0.79332	-1606.5	16437111	0.79679	0.50512	-2708.41	0.51554	0.47813	-2708.32	0.57563	0.48669	-2707.94	0.57563	0.48669	0.48626	-2707.94	B01450	16437111	0.79679	0.46305	0.7659	-4317.23	0.36106	0.79222	0.50524	-4314.91
16.0566	6.1477e-05	G00631	4230591	0.86631	0.91261	-4852.89	0.87316	0.99471	-4844.86	4230591	0.86631	0.86162	-5549.27	0.84307	0.89462	-5548.02	0.82341	0.87185	-5548.33	0.82341	0.85428	0.89295	-5547.74	G00631	4230591	0.86631	0.8663	0.99354	-10136.7	0.87552	0.9931	0.86174	-10136.5
16.0526	6.1607e-05	H00928.H00929	6880883	0.7754	0.80964	-2244.55	0.74355	0.94261	-2236.53	6880883	0.7754	0.80289	-3140.75	0.81621	0.77088	-3140.38	0.8278	0.79587	-3140.49	0.82764	0.81019	0.77355	-3140.31	H00928.H00929	6880883	0.7754	0.78415	0.93509	-5378.81	0.74359	0.94207	0.80288	-5377.27
16.0422	6.19463e-05	D02301	19302756	0.68449	0.85258	-1465.94	0.80304	0.97186	-1457.92	19302756	0.68449	0.78344	-2051.3	0.7558	0.83944	-2049.86	0.76182	0.78778	-2051.16	0.76202	0.75352	0.84071	-2049.85	D02301	19302756	0.68449	0.78991	0.97249	-3472.9	0.8021	0.97203	0.7834	-3472.72
16.0418	6.19594e-05	A00028	129284	0.75936	0.59823	-1990.57	0.69155	0.36179	-1982.55	129284	0.75936	0.64647	-2600.23	0.5971	0.73799	-2598.2	0.43869	0.69921	-2593.76	0.43877	0.68467	0.71713	-2593.67	A00028	129284	0.75936	0.66207	0.36786	-4583.24	0.69137	0.36184	0.64607	-4582.78
16.0366	6.21298e-05	N02316.N02317	20734336	0.86096	0.57607	-1710.27	0.41698	0.81214	-1702.25	20734336	0.86096	0.55391	-2690.25	0.50947	0.65257	-2689.4	0.59795	0.54157	-2690.02	0.59787	0.44134	0.69243	-2688.11	N02316.N02317	20734336	0.86096	0.51488	0.78591	-4323.52	0.41001	0.81236	0.55325	-4321.16
16.0362	6.21429e-05	M01919.M01920	20766789	0.26203	0.29015	-6138.25	0.21587	0.42612	-6130.23	20766789	0.26203	0.26202	-5787.4	0.25649	0.27372	-5787.34	0.22014	0.27353	-5786.79	0.22013	0.27683	0.26805	-5786.78	M01919.M01920	20766789	0.26203	0.2461	0.41751	-11558.2	0.21671	0.422	0.26111	-11557.3
16.0354	6.21692e-05	G00491	3184429	0.51872	0.70455	-648.926	0.60767	0.95564	-640.908	3184429	0.51872	0.59557	-1090.75	0.61123	0.56588	-1090.61	0.82542	0.55541	-1084.54	0.82542	0.51999	0.60788	-1084.09	G00491	3184429	0.51872	0.5998	0.95754	-1731.68	0.60717	0.95578	0.59555	-1731.66
16.0298	6.23533e-05	I01049	14362953	0.87701	0.866	-2531.86	0.80882	0.99998	-2523.85	14362953	0.87701	0.91761	-3162.88	0.91268	0.93364	-3162.74	0.92254	0.91654	-3162.87	0.92256	0.90327	0.93669	-3162.64	I01049	14362953	0.87701	0.88057	0.99997	-5692.23	0.80868	1	0.91772	-5686.73
16.0242	6.2538e-05	G00267.G00268	1537482	0.41711	0.37594	-316.353	0.2456	1	-308.341	1537482	0.41711	0.4674	-899.766	0.4038	0.58448	-898.597	0.35717	0.47748	-899.423	0.35723	0.41095	0.57993	-898.529	G00267.G00268	1537482	0.41711	0.40733	0.99996	-1212.47	0.24617	0.99996	0.46764	-1208.11
16.0198	6.26835e-05	L00898	16690372	0.31016	0.24424	-851.87	0.12451	0.47772	-843.86	16690372	0.31016	0.15634	-1269.38	0.13985	0.19216	-1269.08	0.15371	0.15695	-1269.38	0.15363	0.12787	0.19946	-1268.97	L00898	16690372	0.31016	0.14858	0.46438	-2113.55	0.12395	0.47631	0.15596	-2113.24
16.0182	6.27365e-05	J01464	16302388	0.97326	0.69946	-764.434	0.82951	0.40409	-756.425	16302388	0.97326	0.95078	-1337.82	0.9566	0.93435	-1337.77	0.63408	0.99999	-1326.63	0.63342	1	0.91376	-1325.51	J01464	16302388	0.97326	0.91453	0.36771	-2096.52	0.82985	0.4039	0.95031	-2094.24
16.0176	6.27564e-05	B00860	5313888	0.80214	0.85763	-2105.93	0.78256	1	-2097.92	5313888	0.80214	0.78027	-3037.99	0.76244	0.82888	-3037.54	0.76041	0.78516	-3037.89	0.76041	0.7628	0.82858	-3037.54	B00860	5313888	0.80214	0.78108	0.99999	-5135.91	0.7828	1	0.77992	-5135.91
16.0146	6.28559e-05	L00193	1422174	0.83422	0.62275	-683.293	0.73127	0.2012	-675.285	1422174	0.83422	0.78365	-964.95	0.81969	0.70631	-964.53	0.70025	0.79836	-964.539	0.70024	0.87063	0.67857	-963.48	L00193	1422174	0.83422	0.76435	0.19218	-1640.57	0.73204	0.20101	0.78363	-1640.24
16.0136	6.28891e-05	B01625	17587312	0.80749	0.87844	-1629.45	0.82901	0.97684	-1621.44	17587312	0.80749	0.86763	-2565.93	0.84886	0.90295	-2565.06	0.84348	0.87214	-2565.71	0.84371	0.8505	0.90261	-2565.05	B01625	17587312	0.80749	0.85475	0.97566	-4116.04	0.82889	0.97751	0.86756	-4115.06
16.0122	6.29356e-05	J01143	8969113	0.38503	0.42697	-1114.51	0.32497	0.74002	-1106.5	8969113	0.38503	0.42032	-1966.61	0.44303	0.36014	-1966.06	0.43179	0.41736	-1966.58	0.43179	0.44929	0.35692	-1966.03	J01143	8969113	0.38503	0.39469	0.71771	-3074.87	0.32484	0.73944	0.42014	-3073.11
16.0114	6.29622e-05	E01516	17874156	0.34759	0.27008	-1088.82	0.34556	0.13054	-1080.82	17874156	0.34759	0.20607	-1554.45	0.18418	0.25118	-1553.57	0.18365	0.21161	-1554.25	0.18333	0.18377	0.2508	-1553.57	E01516	17874156	0.34759	0.24973	0.15146	-2643.37	0.34546	0.13101	0.20614	-2635.27
16.0038	6.32155e-05	A01016	7295997	0.90374	0.8804	-497.016	0.92772	0.49624	-489.014	7295997	0.90374	0.89824	-874.341	0.89401	0.90762	-874.299	0.94538	0.89317	-874.042	0.94538	0.88065	0.91138	-873.893	A01016	7295997	0.90374	0.90874	0.50267	-1363.77	0.9276	0.49627	0.8982	-1363.36
15.999	6.3376e-05	I01124	14735314	0.68984	0.79763	-1026.96	0.87279	0.56518	-1018.96	14735314	0.68984	0.84047	-1678.08	0.82261	0.87373	-1677.67	0.74292	0.85736	-1676.44	0.74246	0.85214	0.86463	-1676.42	I01124	14735314	0.68984	0.85109	0.57054	-2697.44	0.87294	0.56494	0.84044	-2697.05
15.9756	6.41642e-05	N01829	15447079	0.62032	0.7089	-1531.98	0.79655	0.53076	-1524	15447079	0.62032	0.7445	-2556.43	0.75282	0.71983	-2556.19	0.74824	0.74334	-2556.42	0.74812	0.76317	0.71495	-2556.14	N01829	15447079	0.62032	0.75871	0.54778	-4081.5	0.79596	0.53147	0.74414	-4080.43
15.9718	6.42931e-05	N01394	10478045	0.85561	0.80395	-350.18	0.72749	1	-342.194	10478045	0.85561	0.76934	-572.87	0.7493	0.81356	-572.572	0.71714	0.7775	-572.625	0.71714	0.76005	0.80875	-572.472	N01394	10478045	0.85561	0.7558	1	-915.374	0.72758	1	0.76913	-915.064
15.9594	6.47156e-05	B00406	1893127	0.65241	0.79742	-896.702	0.85689	0.63536	-888.722	1893127	0.65241	0.77734	-1150.81	0.78553	0.76023	-1150.69	0.80501	0.77007	-1150.51	0.80463	0.77398	0.76514	-1150.5	B00406	1893127	0.65241	0.8043	0.65354	-2043.27	0.85692	0.63519	0.77726	-2039.54
15.957	6.47977e-05	N02467	21649862	0.54011	0.57967	-1548.75	0.48094	0.81697	-1540.77	21649862	0.54011	0.52406	-2559.85	0.45636	0.65885	-2554.3	0.45017	0.54038	-2558.84	0.45017	0.45915	0.65825	-2554.29	N02467	21649862	0.54011	0.51209	0.8053	-4101.07	0.48101	0.81642	0.52404	-4100.63
15.9536	6.49142e-05	D01198.D01199	6168405	0.51337	0.56439	-1748.86	0.46105	0.852	-1740.89	6168405	0.51337	0.58669	-2526.05	0.54305	0.67398	-2524.95	0.59405	0.58504	-2526.05	0.59306	0.51637	0.68241	-2524.61	D01198.D01199	6168405	0.51337	0.54356	0.83348	-4269.42	0.46081	0.8524	0.58677	-4266.94
15.9502	6.50309e-05	H00879	6642005	0.52941	0.43657	-832.346	0.54385	0.21038	-824.371	6642005	0.52941	0.57932	-1321.61	0.65981	0.42442	-1316.93	0.63852	0.56516	-1321.09	0.63851	0.67159	0.4204	-1316.85	H00879	6642005	0.52941	0.56813	0.20373	-2146.22	0.54388	0.21014	0.57932	-2145.98
15.9494	6.50584e-05	N02026	17562058	0.80749	0.68284	-766.715	0.80343	0.37231	-758.74	17562058	0.80749	0.67962	-1451.7	0.72523	0.5774	-1450.15	0.71869	0.67288	-1451.56	0.71855	0.7282	0.57622	-1450.15	N02026	17562058	0.80749	0.71365	0.4092	-2212.98	0.80305	0.37239	0.67943	-2210.44
15.9492	6.50653e-05	B01116.B01117	12875582	0.65241	0.74571	-5286.97	0.68391	0.86321	-5278.99	12875582	0.65241	0.7187	-7232.38	0.72073	0.7143	-7232.37	0.73909	0.71198	-7232.17	0.73875	0.70983	0.71571	-7232.16	B01116.B01117	12875582	0.65241	0.70802	0.87128	-11660.7	0.68357	0.87368	0.71903	-11660.1
15.9468	6.51478e-05	F01987	18565968	0.65775	0.64944	-2050.59	0.57926	0.81732	-2042.61	18565968	0.65775	0.61648	-2436.45	0.61739	0.6107	-2436.44	0.6322	0.61131	-2436.37	0.63208	0.61019	0.61419	-2436.37	F01987	18565968	0.65775	0.60262	0.80761	-4407.16	0.57929	0.81261	0.61587	-4406.68
15.9464	6.51616e-05	I00499	10671634	0.28342	0.30424	-753.07	0.13543	0.81599	-745.097	10671634	0.28342	0.19825	-1129.79	0.15391	0.29671	-1129.18	0.06409	0.22995	-1128.39	0.06403	0.20816	0.2632	-1128.33	I00499	10671634	0.28342	0.18075	0.79193	-1875.25	0.13492	0.81506	0.1982	-1874.89
15.9458	6.51822e-05	H00119	571609	0.3369	0.57962	-566.765	0.70857	0.24094	-558.793	571609	0.3369	0.58044	-997.002	0.60044	0.54096	-996.784	0.5323	0.58905	-996.806	0.5322	0.62846	0.52932	-996.307	H00119	571609	0.3369	0.61768	0.28235	-1558.16	0.70837	0.24102	0.58044	-1555.79
15.9396	6.53961e-05	H01489.H01490	16323700	0.80214	0.83171	-2716.49	0.89383	0.66037	-2708.52	16323700	0.80214	0.83555	-3524.36	0.85243	0.79973	-3523.86	0.81075	0.84161	-3524.16	0.81078	0.87646	0.79059	-3523.09	H01489.H01490	16323700	0.80214	0.85583	0.66762	-6197.6	0.89413	0.65648	0.83552	-6195.79
15.936	6.55206e-05	K01003	14601526	0.94652	0.85983	-1544.23	0.92873	0.72021	-1536.26	14601526	0.94652	0.90091	-1774.04	0.92154	0.86481	-1773.28	0.93549	0.89425	-1773.68	0.93552	0.91643	0.86643	-1773.21	K01003	14601526	0.94652	0.91022	0.72425	-3310.78	0.92859	0.71996	0.90065	-3310.3
15.9356	6.55344e-05	N01194	8553289	0.79144	0.85604	-1354.53	0.80818	1	-1346.57	8553289	0.79144	0.89277	-2212.41	0.89276	0.89037	-2212.41	0.86544	0.89878	-2212.07	0.86515	0.91005	0.88406	-2211.91	N01194	8553289	0.79144	0.86388	1	-3515.36	0.80817	1	0.89277	-3511.31
15.9328	6.56314e-05	C00135	3519696	0.49198	0.48311	-1004.25	0.37159	0.73441	-996.279	3519696	0.49198	0.37539	-1291.99	0.3821	0.36012	-1291.94	0.41185	0.36716	-1291.79	0.41185	0.36716	0.36624	-1291.79	C00135	3519696	0.49198	0.37469	0.73325	-2288.27	0.37166	0.73325	0.37579	-2288.27
15.9326	6.56384e-05	D00794	3819373	0.71123	0.83278	-2463.11	0.77587	0.94714	-2455.14	3819373	0.71123	0.85347	-3066.9	0.85126	0.85862	-3066.88	0.94177	0.83008	-3063.06	0.94157	0.79456	0.87381	-3061.92	D00794	3819373	0.71123	0.82654	0.94374	-5525.03	0.77602	0.94729	0.85361	-5522.04
15.932	6.56592e-05	A00032	146659	0.93048	0.85718	-1054.12	0.99999	0.49022	-1046.16	146659	0.93048	0.82504	-1060.19	0.79424	0.89607	-1059.94	0.68202	0.8567	-1058.91	0.68202	0.858	0.85165	-1058.9	A00032	146659	0.93048	0.87698	0.52205	-2109.85	0.99999	0.49048	0.82427	-2106.34
15.932	6.56592e-05	F00426	1983818	0.86631	0.75572	-2050.65	0.66376	0.99997	-2042.68	1983818	0.86631	0.78991	-3240.22	0.7653	0.84161	-3239.38	0.75455	0.79619	-3239.97	0.75422	0.76941	0.84029	-3239.35	F00426	1983818	0.86631	0.75418	0.95736	-5249.38	0.66164	0.99978	0.78944	-5245.12
15.9302	6.57217e-05	M01090.M01091.M01092	16862985	0.20321	0.24851	-1367.62	0.18483	0.40417	-1359.66	16862985	0.20321	0.2609	-2097.15	0.27769	0.22556	-2096.63	0.3309	0.24622	-2095.77	0.33071	0.25455	0.2329	-2095.7	M01090.M01091.M01092	16862985	0.20321	0.23566	0.39102	-3459.77	0.18455	0.40391	0.26085	-3456.81
15.926	6.58677e-05	A00327	1646351	0.92513	0.9077	-1639.63	0.8702	1	-1631.66	1646351	0.92513	0.9305	-2766.66	0.96274	0.86297	-2761.33	0.96268	0.91989	-2765.38	0.96266	0.96284	0.86295	-2761.33	A00327	1646351	0.92513	0.91131	1	-4366.11	0.87001	1	0.93036	-4363.03
15.9194	6.60977e-05	L01116	21595246	0.80749	0.93068	-2873.26	0.88766	0.99999	-2865.3	21595246	0.80749	0.87129	-3624.92	0.81908	0.96886	-3618.22	0.80478	0.88705	-3623.1	0.80478	0.82645	0.96753	-3618.14	L01116	21595246	0.80749	0.87768	0.99999	-6373.01	0.88944	0.99999	0.87131	-6372.8
15.911	6.63917e-05	H00466	2834916	0.49733	0.63767	-647.563	0.74179	0.26321	-639.608	2834916	0.49733	0.64654	-1003.43	0.64654	0.64732	-1003.43	0.84698	0.62779	-1001.58	0.84698	0.58887	0.68615	-1001.26	H00466	2834916	0.49733	0.6802	0.29686	-1644.63	0.74167	0.2635	0.64655	-1643.04
15.9064	6.65533e-05	C00893	16205521	0.83422	0.84362	-3679.79	0.79021	0.93855	-3671.84	16205521	0.83422	0.82988	-4572.36	0.83923	0.80553	-4571.98	0.84678	0.82524	-4572.21	0.84651	0.83917	0.80553	-4571.96	C00893	16205521	0.83422	0.8151	0.94113	-8129.72	0.78696	0.94362	0.82964	-8128.63
15.9048	6.66096e-05	F00645	2999706	0.87166	0.60675	-694.901	0.48137	0.89849	-686.949	2999706	0.87166	0.63247	-1067.18	0.59689	0.71658	-1066.11	0.50059	0.6695	-1064.21	0.50059	0.65685	0.68868	-1064.16	F00645	2999706	0.87166	0.59169	0.84521	-1757.81	0.48259	0.89766	0.63245	-1754.13
15.8892	6.71609e-05	H01321	15460773	0.89305	0.8296	-1007.31	0.88109	0.63043	-999.361	15460773	0.89305	0.85318	-1667.54	0.83518	0.89064	-1666.67	0.86823	0.84994	-1667.45	0.86823	0.82146	0.89335	-1666.22	H01321	15460773	0.89305	0.86294	0.63546	-2667.41	0.8812	0.6302	0.85316	-2666.9
15.8872	6.72319e-05	K00459	2296736	0.57754	0.80737	-367.269	1	0.10339	-359.325	2296736	0.57754	0.66218	-747.821	0.61306	0.75213	-747.539	0.64231	0.66509	-747.814	0.64231	0.60227	0.75753	-747.519	K00459	2296736	0.57754	0.78384	0.22934	-1112.79	0.99998	0.10314	0.66207	-1107.15
15.872	6.7774e-05	N00554	2765978	0.81818	0.90484	-782.839	0.8312	1	-774.903	2765978	0.81818	0.88304	-1135.48	0.90911	0.82941	-1134.74	0.87777	0.88414	-1135.48	0.87799	0.93213	0.81744	-1134.31	N00554	2765978	0.81818	0.86891	1	-1911.07	0.83113	1	0.88296	-1910.39
15.8472	6.86681e-05	A00638	3485959	0.76471	0.66377	-3497.74	0.59467	0.77291	-3489.81	3485959	0.76471	0.6495	-3585.36	0.65604	0.63513	-3585.24	0.67277	0.64295	-3585.15	0.67276	0.64846	0.63654	-3585.13	A00638	3485959	0.76471	0.63139	0.77141	-6867.6	0.59417	0.77446	0.64937	-6866.26
15.8382	6.89954e-05	C00526	13178279	0.77005	0.84408	-857.251	0.77108	0.9756	-849.332	13178279	0.77005	0.83397	-1208.25	0.83866	0.82105	-1208.19	0.90501	0.81872	-1206.76	0.90533	0.806	0.83632	-1206.65	C00526	13178279	0.77005	0.8141	0.96981	-2058.98	0.77114	0.97569	0.83405	-2057.58
15.823	6.95519e-05	F00436	2035416	0.82353	0.73102	-1188.34	0.80864	0.46016	-1180.42	2035416	0.82353	0.82346	-1865.52	0.8075	0.85827	-1865.17	0.81223	0.82569	-1865.49	0.81186	0.80524	0.85908	-1865.16	F00436	2035416	0.82353	0.81833	0.45644	-3046.01	0.80846	0.46026	0.82336	-3045.94
15.8148	6.9854e-05	B00504.B00505	2414859	0.71658	0.70528	-3417.33	0.62636	0.84708	-3409.42	2414859	0.71658	0.72133	-4141.36	0.73309	0.68908	-4140.99	0.81299	0.69259	-4138.25	0.81401	0.68643	0.70172	-4138.22	B00504.B00505	2414859	0.71658	0.69137	0.85079	-7267.26	0.62698	0.86	0.7212	-7264.28
15.8122	6.995e-05	J01530	17104307	0.62032	0.68891	-1298.36	0.599	0.93695	-1290.45	17104307	0.62032	0.58563	-1908.83	0.58037	0.60165	-1908.78	0.62426	0.57752	-1908.64	0.62406	0.55604	0.6125	-1908.46	J01530	17104307	0.62032	0.59014	0.93896	-3199.31	0.59864	0.93732	0.58545	-3199.28
15.7872	7.08804e-05	H00384	2349809	0.65241	0.8277	-1086.99	0.77725	1	-1079.1	2349809	0.65241	0.78666	-2119.67	0.78158	0.80148	-2119.61	0.82877	0.7756	-2119.24	0.82877	0.75212	0.80899	-2118.88	H00384	2349809	0.65241	0.78386	1	-3198.8	0.7772	1	0.78694	-3198.77
15.7862	7.09179e-05	K00461	2305789	0.76471	0.87506	-2978.93	0.81861	0.94935	-2971.03	2305789	0.76471	0.85221	-3369.74	0.8271	0.8924	-3368.29	0.82337	0.86007	-3369.27	0.82337	0.8298	0.89176	-3368.29	K00461	2305789	0.76471	0.8425	0.95231	-5788.74	0.82062	0.95378	0.85219	-5788.11
15.771	7.14899e-05	D02543.D02544.D02545.D02546.D02547	20934447	0.85561	0.75803	-2892.2	0.684	0.87191	-2884.31	20934447	0.85561	0.74493	-3895.59	0.72859	0.77478	-3895.17	0.725	0.74966	-3895.46	0.72471	0.73054	0.7742	-3895.16	D02543.D02544.D02545.D02546.D02547	20934447	0.85561	0.72611	0.86656	-6781.38	0.68362	0.87143	0.74452	-6779.91
15.7594	7.19296e-05	N03116	25013801	0.70588	0.76464	-1398	0.8454	0.57461	-1390.12	25013801	0.70588	0.75788	-2346.48	0.8201	0.62956	-2341.57	0.86682	0.7204	-2341.18	0.86694	0.77379	0.65287	-2339.91	N03116	25013801	0.70588	0.78352	0.60031	-3739.61	0.84537	0.57453	0.75792	-3736.59
15.7514	7.22345e-05	B00994	8133425	0.50267	0.5081	-2885.61	0.43751	0.65086	-2877.74	8133425	0.50267	0.47294	-3897.53	0.47393	0.47026	-3897.53	0.4436	0.48138	-3897.23	0.44355	0.49276	0.46584	-3897.11	B00994	8133425	0.50267	0.46129	0.64736	-6775.78	0.43763	0.65076	0.47289	-6775.27
15.7502	7.22803e-05	B00726	4037538	0.82353	0.8782	-581.245	0.96653	0.72052	-573.37	4037538	0.82353	0.8848	-1111.48	0.87087	0.90993	-1111.15	0.89187	0.8835	-1111.46	0.89239	0.86197	0.91228	-1111.02	B00726	4037538	0.82353	0.90646	0.7504	-1688.19	0.96663	0.7208	0.8848	-1684.85
15.7244	7.32729e-05	M01226	17509003	0.68449	0.68095	-800.962	0.59094	0.96791	-793.1	17509003	0.68449	0.70005	-1671.28	0.67528	0.76996	-1670.67	0.66018	0.71327	-1670.96	0.66018	0.68532	0.76562	-1670.62	M01226	17509003	0.68449	0.66592	0.95468	-2466.59	0.59074	0.96689	0.69992	-2464.38
15.7242	7.32806e-05	L01583	24441506	0.18182	0.48525	-762.43	0.36649	0.85653	-754.567	24441506	0.18182	0.54016	-1006.19	0.4812	0.64551	-1005.24	0.62757	0.52737	-1005.87	0.62756	0.42836	0.66665	-1004.18	L01583	24441506	0.18182	0.47399	0.8316	-1763.95	0.36643	0.85647	0.54024	-1760.76
15.7158	7.36067e-05	G00635.G00636	4250520	0.25668	0.2315	-4872.15	0.28788	0.09687	-4864.29	4250520	0.25668	0.20989	-4933.53	0.20718	0.21724	-4933.51	0.21759	0.20787	-4933.51	0.21759	0.20031	0.21888	-4933.44	G00635.G00636	4250520	0.25668	0.23871	0.10208	-9602.99	0.28999	0.09756	0.20983	-9599.96
15.7076	7.39265e-05	C00590	13852664	0.74332	0.81934	-1319.17	0.88422	0.70374	-1311.32	13852664	0.74332	0.83423	-1989.38	0.83619	0.83001	-1989.36	0.79533	0.84377	-1988.61	0.79533	0.85952	0.82377	-1988.25	C00590	13852664	0.74332	0.84909	0.71334	-3302.43	0.88413	0.7038	0.83401	-3300.7
15.703	7.41065e-05	H00926.H00927	6873891	0.90374	0.73527	-2178.99	0.80595	0.55376	-2171.14	6873891	0.90374	0.78589	-3409.57	0.79127	0.76895	-3409.47	0.83476	0.77111	-3408.57	0.83478	0.767	0.77753	-3408.55	H00926.H00927	6873891	0.90374	0.79202	0.55841	-5547.04	0.80451	0.55531	0.78604	-5546.89
15.7024	7.41301e-05	H00193	1033225	0.92513	0.81532	-999.705	0.93983	0.46164	-991.854	1033225	0.92513	0.95344	-1653.42	1	0.86475	-1651.46	0.89982	0.95778	-1653.23	0.89981	1	0.86521	-1650.83	H00193	1033225	0.92513	0.94867	0.4573	-2645.31	0.94006	0.46163	0.9532	-2645.27
15.6998	7.4232e-05	H02002	19353675	0.65241	0.55163	-2134.58	0.6243	0.4074	-2126.73	19353675	0.65241	0.5834	-2883.85	0.60143	0.54742	-2883.32	0.69856	0.55357	-2879.8	0.69855	0.54875	0.55982	-2879.78	H02002	19353675	0.65241	0.59708	0.41162	-5011.23	0.62418	0.40742	0.58322	-5010.58
15.6982	7.42948e-05	M00173	1473784	0.76471	0.79514	-3506.64	0.99997	0.33254	-3498.79	1473784	0.76471	0.92584	-4795.18	0.85797	0.99994	-4794.56	0.77804	0.96585	-4794.59	0.7771	0.90309	0.99994	-4794.34	M00173	1473784	0.76471	0.97236	0.34269	-8212.44	0.99992	0.33853	0.92662	-8212.02
15.6838	7.48626e-05	N01992	17068758	0.70053	0.62129	-1172.21	0.69205	0.44273	-1164.36	17068758	0.70053	0.73778	-1819.03	0.7151	0.79274	-1818.14	0.72344	0.74288	-1818.94	0.72327	0.70675	0.79694	-1818.09	N01992	17068758	0.70053	0.7229	0.43741	-2984.24	0.69186	0.44269	0.73786	-2983.4
15.6826	7.49101e-05	J00184	860574	0.60963	0.60462	-620.45	0.52545	0.81233	-612.609	860574	0.60963	0.59275	-1083.37	0.59544	0.58286	-1083.35	0.5806	0.59705	-1083.32	0.58057	0.6105	0.57579	-1083.23	J00184	860574	0.60963	0.5707	0.80235	-1697.21	0.52544	0.81231	0.59274	-1695.98
15.6796	7.50291e-05	M00671	14368279	0.80749	0.70551	-565.319	0.76176	0.37774	-557.479	14368279	0.80749	0.74087	-1308.96	0.74033	0.74087	-1308.96	0.83131	0.72587	-1307.6	0.83131	0.70704	0.75845	-1307.38	M00671	14368279	0.80749	0.74823	0.38138	-1866.59	0.76164	0.37792	0.74072	-1866.44
15.6782	7.50846e-05	E00998	11997188	0.68984	0.77211	-698.243	0.85906	0.53127	-690.404	11997188	0.68984	0.80287	-1442.17	0.76219	0.88135	-1439.95	0.7723	0.80839	-1441.99	0.7723	0.75678	0.88315	-1439.92	E00998	11997188	0.68984	0.81897	0.55316	-2133.75	0.85919	0.53162	0.80306	-2132.58
15.6656	7.55865e-05	A00582.A00583	3099690	0.79144	0.94233	-1830.89	0.98342	0.68845	-1823.06	3099690	0.79144	0.93963	-2464.83	0.92043	0.99995	-2463.7	0.78453	0.96262	-2461.19	0.78453	0.95354	0.99995	-2460.74	A00582.A00583	3099690	0.79144	0.96039	0.69407	-4289.22	0.98313	0.68852	0.93858	-4287.89
15.6656	7.55865e-05	A00473	2489163	0.78075	0.75855	-780.359	0.64658	0.99998	-772.526	2489163	0.78075	0.67235	-1299.76	0.67438	0.66568	-1299.76	0.69901	0.66485	-1299.66	0.6983	0.66211	0.67093	-1299.65	A00473	2489163	0.78075	0.66431	0.99546	-2072.41	0.64757	0.99947	0.67238	-2072.29
15.661	7.57706e-05	M01987	21055162	0.64706	0.61127	-1621	0.72453	0.3739	-1613.17	21055162	0.64706	0.63401	-2554.73	0.62991	0.64727	-2554.7	0.62195	0.63777	-2554.71	0.62191	0.63224	0.64717	-2554.69	M01987	21055162	0.64706	0.66121	0.38621	-4169.31	0.72371	0.37415	0.63397	-4167.9
15.6582	7.58828e-05	H02205	22008241	0.80214	0.89023	-5484.76	0.82691	0.99999	-5476.93	22008241	0.80214	0.875	-5024.02	0.87283	0.88487	-5024	0.79144	0.90098	-5022.39	0.79066	0.91785	0.86595	-5022.16	H02205	22008241	0.80214	0.85211	0.99999	-9961.26	0.81578	0.99997	0.87512	-9960.26
15.6564	7.59551e-05	H00087	421916	0.39037	0.22929	-1574.3	0.31516	0.03608	-1566.47	421916	0.39037	0.20763	-2313.7	0.15461	0.3153	-2310.26	0.13994	0.22179	-2312.73	0.14022	0.16009	0.31346	-2310.2	H00087	421916	0.39037	0.24153	0.05885	-3883.42	0.31511	0.03547	0.20763	-3880.17
15.6436	7.64709e-05	D02240	18767875	0.72727	0.74126	-1339.5	0.81817	0.59905	-1331.68	18767875	0.72727	0.75407	-2326.14	0.73834	0.78415	-2325.7	0.73579	0.75905	-2326.02	0.73565	0.73926	0.78392	-2325.69	D02240	18767875	0.72727	0.77354	0.60793	-3627	0.81842	0.59785	0.75394	-3625.11
15.6386	7.66734e-05	E01796	24122563	0.63636	0.56999	-3060.4	0.63723	0.40568	-3052.58	24122563	0.63636	0.63034	-3577.06	0.66486	0.54922	-3574.61	0.62516	0.63169	-3577.06	0.62516	0.68805	0.54388	-3573.9	E01796	24122563	0.63636	0.6325	0.40663	-6598.13	0.63712	0.40612	0.63043	-6598.11
15.6224	7.73331e-05	H01526	16537649	0.65241	0.51379	-2157.98	0.59642	0.36388	-2150.17	16537649	0.65241	0.51226	-2825.39	0.50431	0.53599	-2825.22	0.4273	0.5381	-2823.12	0.42674	0.55475	0.51477	-2822.96	H01526	16537649	0.65241	0.53961	0.37617	-4977.93	0.59636	0.36405	0.51234	-4975.56
15.6054	7.80314e-05	D00464.D00465	2188676	0.7754	0.86854	-2262.3	0.91853	0.6245	-2254.5	2188676	0.7754	0.82289	-3319.26	0.83393	0.7955	-3319.03	0.70954	0.84191	-3317.45	0.70983	0.88281	0.78107	-3316.17	D00464.D00465	2188676	0.7754	0.86067	0.63784	-5577.76	0.91844	0.62438	0.82251	-5573.76
15.5988	7.83043e-05	N02881	23937528	0.28877	0.49923	-1202.14	0.61408	0.27175	-1194.34	23937528	0.28877	0.42398	-2048.66	0.4457	0.37548	-2048.18	0.52101	0.39537	-2046.55	0.52101	0.39493	0.39537	-2046.55	N02881	23937528	0.28877	0.47628	0.33584	-3213.31	0.61253	0.27742	0.42425	-3205.85
15.5948	7.84701e-05	H00163	789840	0.5615	0.69321	-867.223	0.77581	0.42981	-859.426	789840	0.5615	0.68589	-1680.41	0.7043	0.65147	-1680.11	0.8015	0.66556	-1678.52	0.8015	0.66649	0.66352	-1678.52	H00163	789840	0.5615	0.71558	0.44946	-2542	0.77545	0.42885	0.68586	-2539.84
15.5916	7.8603e-05	D00345	1575618	0.73797	0.62632	-945.68	0.49751	0.90523	-937.885	1575618	0.73797	0.60821	-1541.86	0.54828	0.71558	-1539.75	0.59866	0.61006	-1541.85	0.59865	0.52229	0.72324	-1539.41	D00345	1575618	0.73797	0.57775	0.87985	-2481.41	0.49765	0.90453	0.60792	-2479.75
15.5912	7.86196e-05	K00501	2523378	0.43316	0.50367	-907.63	0.61441	0.15752	-899.834	2523378	0.43316	0.50655	-1568.09	0.54899	0.43226	-1566.98	0.49239	0.50894	-1568.07	0.49183	0.57202	0.42409	-1566.59	K00501	2523378	0.43316	0.53719	0.18782	-2469.92	0.61417	0.15807	0.5063	-2467.92
15.5842	7.89112e-05	G00510	3318994	0.95722	0.7427	-763.615	0.59855	0.99999	-755.823	3318994	0.95722	0.72712	-1365.12	0.76676	0.64627	-1364.14	0.6521	0.74202	-1364.62	0.6521	0.81286	0.63349	-1362.72	G00510	3318994	0.95722	0.69276	0.99055	-2122.9	0.59848	0.99991	0.72694	-2120.94
15.5842	7.89112e-05	A00924	5720502	0.66845	0.50426	-1377.67	0.637	0.23495	-1369.88	5720502	0.66845	0.51645	-2085.65	0.49443	0.5631	-2085.39	0.39997	0.55252	-2084.13	0.39983	0.55737	0.54577	-2084.12	A00924	5720502	0.66845	0.55611	0.26339	-3406.22	0.63623	0.24353	0.51619	-3404.34
15.5814	7.90282e-05	J00405	1810751	0.50802	0.41085	-791.606	0.29154	0.65214	-783.816	1810751	0.50802	0.44259	-1422.36	0.44193	0.44536	-1422.36	0.40667	0.45041	-1422.17	0.40668	0.45943	0.437	-1422.13	J00405	1810751	0.50802	0.40176	0.60345	-2210.67	0.29204	0.65186	0.44273	-2206.17
15.5776	7.91872e-05	N02376	21160518	0.67914	0.55406	-633.687	0.64595	0.26653	-625.898	21160518	0.67914	0.61647	-1452.68	0.62016	0.6046	-1452.65	0.5619	0.62575	-1452.31	0.56188	0.64348	0.59458	-1452.12	N02376	21160518	0.67914	0.62513	0.27353	-2078.76	0.64547	0.26685	0.61635	-2078.57
15.5676	7.96071e-05	A00714	3965353	0.82353	0.64592	-139.895	0.8868	0.00734	-132.112	3965353	0.82353	0.79239	-252.644	0.83815	0.70948	-252.238	0.63454	0.80999	-251.844	0.63454	0.91631	0.64712	-250.203	A00714	3965353	0.82353	0.81556	0.07021	-385.614	0.88634	0.00771	0.79249	-384.756
15.5658	7.96829e-05	K00771	9483018	0.3262	0.52646	-775.024	0.42815	0.79475	-767.241	9483018	0.3262	0.37621	-1233.62	0.28823	0.55288	-1228.2	0.1925	0.4217	-1228.17	0.1929	0.34624	0.52835	-1226.22	K00771	9483018	0.3262	0.39208	0.80585	-2001.39	0.42808	0.79439	0.37632	-2000.87
15.5454	8.05474e-05	L01726	25100942	0.13904	0.27199	-562.12	0.36032	0	-554.347	25100942	0.13904	0.22948	-1246.98	0.21513	0.26728	-1246.79	0.31287	0.21843	-1246.44	0.31283	0.19084	0.27753	-1245.94	L01726	25100942	0.13904	0.27243	0	-1804.3	0.36036	0	0.22978	-1801.33
15.5436	8.06241e-05	C00758	15309985	0.80214	0.31668	-605.71	0.418	0.12068	-597.938	15309985	0.80214	0.50813	-1410.58	0.50697	0.51221	-1410.57	0.34053	0.53458	-1407.61	0.34053	0.55997	0.49616	-1407.27	C00758	15309985	0.80214	0.48287	0.10822	-2010.03	0.41804	0.11987	0.50841	-2008.51
15.5424	8.06753e-05	L00457	6069816	0.39037	0.24659	-1615.75	0.32718	0.05861	-1607.98	6069816	0.39037	0.27734	-2170.55	0.30936	0.21608	-2169.44	0.29768	0.27203	-2170.45	0.29859	0.31556	0.21424	-2169.41	L00457	6069816	0.39037	0.29327	0.06669	-3779.22	0.32721	0.05858	0.27741	-3778.52
15.5416	8.07095e-05	C01227.C01228	18108364	0.94118	0.90454	-3896.11	0.9496	0.82405	-3888.34	18108364	0.94118	0.91662	-5113.28	0.92317	0.89944	-5112.92	0.95853	0.90343	-5110.98	0.95849	0.90246	0.90445	-5110.97	C01227.C01228	18108364	0.94118	0.92642	0.83246	-8578.58	0.9494	0.82918	0.91634	-8577.07
15.5308	8.11719e-05	G00052	370606	0.75401	0.50193	-514.637	0.36102	0.79988	-506.871	370606	0.75401	0.48093	-1045.91	0.4373	0.5686	-1044.38	0.46978	0.48354	-1045.9	0.46978	0.42001	0.57511	-1044.18	G00052	370606	0.75401	0.45306	0.74596	-1555.15	0.36223	0.79915	0.48115	-1552.79
15.5288	8.12578e-05	J00532.J00533	2797691	0.31016	0.38484	-1142.64	0.29646	0.62799	-1134.87	2797691	0.31016	0.29719	-1643.37	0.26271	0.37876	-1642.03	0.21553	0.32317	-1641.74	0.21541	0.29451	0.36773	-1641.33	J00532.J00533	2797691	0.31016	0.2971	0.62807	-2778.25	0.29608	0.62807	0.2971	-2778.25
15.5274	8.1318e-05	H01680	17344154	0.71658	0.51653	-2008.91	0.43722	0.70667	-2001.15	17344154	0.71658	0.52932	-3524.52	0.46781	0.65926	-3519.25	0.41864	0.56658	-3520.4	0.41942	0.50474	0.64788	-3518.21	H01680	17344154	0.71658	0.5013	0.69412	-5528.24	0.43703	0.7065	0.52936	-5525.66
15.5196	8.16542e-05	F00465	2139205	0.86096	0.86795	-709.295	0.97255	0.60854	-701.536	2139205	0.86096	0.91154	-1713.82	0.91335	0.90505	-1713.82	0.93065	0.90761	-1713.75	0.93033	0.90672	0.9094	-1713.75	F00465	2139205	0.86096	0.9278	0.63721	-2416.49	0.9726	0.60906	0.91116	-2415.36
15.5192	8.16715e-05	M01109.M01110	16961504	0.59893	0.65974	-3310.01	0.59472	0.77851	-3302.25	16961504	0.59893	0.61497	-4145.9	0.60908	0.62797	-4145.81	0.59229	0.62125	-4145.71	0.59227	0.61744	0.62681	-4145.69	M01109.M01110	16961504	0.59893	0.60832	0.77374	-7373.84	0.59463	0.77556	0.6149	-7373.65
15.5168	8.17752e-05	D01673	14006266	0.41711	0.467	-1086.44	0.5665	0.24496	-1078.68	14006266	0.41711	0.39788	-1564.3	0.36908	0.45085	-1563.65	0.37534	0.4021	-1564.23	0.37533	0.36523	0.45228	-1563.64	D01673	14006266	0.41711	0.4491	0.27958	-2649.29	0.56629	0.24479	0.39736	-2642.98
15.5126	8.19571e-05	F00529.F00530	2485132	0.51872	0.85077	-704.793	0.99999	0.37514	-697.037	2485132	0.51872	0.95465	-1069.22	0.96843	0.91444	-1068.85	0.99999	0.94974	-1068.83	0.99999	0.96395	0.91693	-1068.59	F00529.F00530	2485132	0.51872	0.96033	0.39799	-1766.68	0.99999	0.37551	0.9542	-1766.26
15.4972	8.26276e-05	H01408	15935765	0.22995	0.2285	-5016.29	0.16575	0.32757	-5008.54	15935765	0.22995	0.27155	-4734.54	0.27619	0.25951	-4734.46	0.30247	0.26268	-4734.18	0.30247	0.26268	0.26268	-4734.18	H01408	15935765	0.22995	0.23403	0.32197	-9562.61	0.16543	0.32809	0.27101	-9556.53
15.4952	8.2715e-05	H00066.H00067	299728	0.6738	0.58723	-1590.04	0.66642	0.3386	-1582.29	299728	0.6738	0.66391	-2397.34	0.63636	0.73799	-2396.34	0.58575	0.6895	-2395.78	0.58582	0.66926	0.72489	-2395.54	H00066.H00067	299728	0.6738	0.66478	0.33911	-3979.63	0.66644	0.33877	0.66389	-3979.63
15.4934	8.27938e-05	I00135	1259553	0.62032	0.82857	-468.359	0.92238	0.4399	-460.612	1259553	0.62032	0.80536	-829.486	0.83043	0.75792	-829.21	0.6649	0.82794	-828.054	0.66489	0.89827	0.72285	-826.654	I00135	1259553	0.62032	0.84671	0.4773	-1292.67	0.92224	0.43918	0.80523	-1290.1
15.49	8.29429e-05	J01523	16848238	0.4492	0.53406	-761.91	0.44363	0.85597	-754.165	16848238	0.4492	0.61537	-1864.33	0.5619	0.76303	-1860.66	0.61149	0.61734	-1864.33	0.61149	0.51963	0.77663	-1859.72	J01523	16848238	0.4492	0.56415	0.80493	-2624.68	0.44385	0.8559	0.61564	-2618.5
15.4828	8.32594e-05	F01465	12837951	0.73797	0.66724	-1576.05	0.76307	0.40588	-1568.3	12837951	0.73797	0.65812	-2192.41	0.65996	0.65359	-2192.4	0.6158	0.67279	-2192.05	0.6159	0.69486	0.64004	-2191.88	F01465	12837951	0.73797	0.69262	0.42553	-3762.96	0.76273	0.40607	0.65835	-3760.71
15.4794	8.34093e-05	D00774.D00775.D00776	3749098	0.70588	0.52464	-5163.25	0.44997	0.63913	-5155.51	3749098	0.70588	0.50194	-5600.55	0.47976	0.54369	-5599.69	0.42734	0.52358	-5598.56	0.4274	0.51236	0.53776	-5598.46	D00774.D00775.D00776	3749098	0.70588	0.48346	0.63939	-10308.4	0.44345	0.64229	0.50166	-10307.1
15.4634	8.41184e-05	N00687	3653297	0.93583	0.81109	-910.901	0.8807	0.56946	-903.169	3653297	0.93583	0.90357	-1414.47	0.90281	0.90564	-1414.46	0.91425	0.90103	-1414.42	0.91425	0.89669	0.90832	-1414.4	N00687	3653297	0.93583	0.8954	0.56466	-2317.89	0.88082	0.5693	0.9033	-2317.64
15.4526	8.46005e-05	E00189	1010568	0.78075	0.75664	-2518.34	0.6883	0.90106	-2510.61	1010568	0.78075	0.76642	-3342.62	0.76937	0.75859	-3342.6	0.73758	0.77428	-3342.37	0.73765	0.7901	0.75106	-3342.17	E00189	1010568	0.78075	0.73916	0.89065	-5855.61	0.68769	0.90078	0.76617	-5853.24
15.4448	8.49504e-05	I00075	652586	0.31551	0.36978	-1044.42	0.27682	0.59439	-1036.7	652586	0.31551	0.30315	-2019.04	0.27364	0.35824	-2018.13	0.18125	0.33325	-2015.33	0.18095	0.32929	0.33888	-2015.32	I00075	652586	0.31551	0.29548	0.58739	-3055.93	0.27771	0.59412	0.30307	-3055.74
15.4432	8.50223e-05	D01567	10523356	0.6631	0.65271	-733.622	0.56041	0.94173	-725.9	10523356	0.6631	0.68013	-1059.6	0.69973	0.63996	-1059.34	0.59721	0.70139	-1058.66	0.59733	0.76218	0.61549	-1057.43	D01567	10523356	0.6631	0.63705	0.91195	-1788.18	0.56061	0.9411	0.68013	-1785.5
15.4428	8.50403e-05	L01060	21026424	0.91979	0.75205	-2125.56	0.66838	0.94252	-2117.84	21026424	0.91979	0.78262	-2694.88	0.76105	0.82625	-2694.42	0.82627	0.77094	-2694.46	0.82627	0.71994	0.84158	-2693.26	L01060	21026424	0.91979	0.7433	0.91731	-4740.97	0.66715	0.93641	0.78227	-4737.43
15.4374	8.52836e-05	J00368	1650377	0.66845	0.63347	-1862.35	0.72533	0.39772	-1854.64	1650377	0.66845	0.64303	-2543.89	0.66596	0.59242	-2543.34	0.68522	0.62871	-2543.44	0.68507	0.6531	0.59711	-2543.22	J00368	1650377	0.66845	0.66921	0.41913	-4400.3	0.72504	0.39802	0.64251	-4398.53
15.437	8.53017e-05	N02762	23230195	0.81818	0.86529	-2191.96	0.81209	0.94851	-2184.24	23230195	0.81818	0.82507	-2828.53	0.80188	0.86842	-2827.26	0.83142	0.82347	-2828.51	0.83142	0.7843	0.87274	-2826.74	N02762	23230195	0.81818	0.82106	0.94792	-5012.86	0.81152	0.94833	0.82508	-5012.77
15.436	8.53468e-05	F00438	2042467	0.47594	0.287	-1036.16	0.36461	0	-1028.44	2042467	0.47594	0.35288	-1447.46	0.32734	0.40312	-1447.05	0.28422	0.36448	-1447.04	0.28413	0.34231	0.39803	-1446.86	F00438	2042467	0.47594	0.35726	2e-05	-2475.93	0.3647	2e-05	0.35273	-2475.9
15.4312	8.55639e-05	C00513	12924089	0.64171	0.90712	-1053.36	0.85394	1	-1045.64	12924089	0.64171	0.89444	-1107.31	0.87986	0.92197	-1106.87	0.93581	0.88361	-1106.47	0.93579	0.84558	0.93044	-1105.13	C00513	12924089	0.64171	0.88127	1	-2082.04	0.85354	1	0.89451	-2081.23
15.4308	8.5582e-05	N01013.N01014	7337759	0.6631	0.58725	-966.621	0.6949	0.30762	-958.905	7337759	0.6631	0.5281	-1600.72	0.52874	0.52783	-1600.72	0.48791	0.53806	-1600.49	0.48797	0.5539	0.5168	-1600.41	N01013.N01014	7337759	0.6631	0.5804	0.35656	-2564.69	0.69448	0.30808	0.52852	-2559.62
15.4296	8.56364e-05	N02985.N02986.N02987	24417403	0.88235	0.92792	-8421.29	0.9724	0.86034	-8413.57	24417403	0.88235	0.95242	-7862.84	0.94079	0.97279	-7862.03	0.93382	0.95778	-7862.42	0.93342	0.94472	0.9723	-7861.97	N02985.N02986.N02987	24417403	0.88235	0.95888	0.86124	-15030.9	0.97345	0.85996	0.95209	-15030.1
15.4296	8.56364e-05	J01382.J01383	15384380	0.83422	0.66771	-3202.16	0.77871	0.42466	-3194.45	15384380	0.83422	0.64983	-3947.17	0.65114	0.64383	-3947.16	0.54094	0.68052	-3945.48	0.54094	0.73152	0.6038	-3944.76	J01382.J01383	15384380	0.83422	0.69254	0.45065	-7144.56	0.77934	0.4246	0.64944	-7141.61
15.428	8.57089e-05	N02366	21086163	0.08556	0.24014	-278.762	0.32091	0	-271.048	21086163	0.08556	0.13159	-705.38	0.13494	0.12025	-705.346	0.108	0.13707	-705.245	0.108	0.15001	0.11367	-705.112	N02366	21086163	0.08556	0.19205	0	-984.889	0.32105	0	0.13162	-976.428
15.4166	8.62275e-05	J01729.J01730	18408200	0.69519	0.52757	-2890.9	0.60149	0.38933	-2883.19	18408200	0.69519	0.5859	-4255.02	0.58733	0.58203	-4255.02	0.59599	0.58289	-4254.99	0.59536	0.5827	0.58289	-4254.99	J01729.J01730	18408200	0.69519	0.5911	0.38942	-7138.3	0.60086	0.38942	0.58591	-7138.21
15.41	8.65292e-05	E00064	331527	0.83957	0.8857	-1791.26	0.8467	0.99236	-1783.55	331527	0.83957	0.87619	-2588	0.87419	0.8834	-2587.97	0.88284	0.87394	-2587.96	0.88265	0.8654	0.88694	-2587.85	E00064	331527	0.83957	0.86631	0.99099	-4372.21	0.84654	0.99238	0.87615	-4371.56
15.4082	8.66116e-05	N02450	21552967	0.86096	0.93059	-1434.87	0.97993	0.67428	-1427.16	21552967	0.86096	0.91673	-2570.34	0.89278	0.96644	-2569.48	0.82947	0.92596	-2569.47	0.82885	0.90708	0.96087	-2569.01	N02450	21552967	0.86096	0.9397	0.68788	-4000.07	0.97983	0.67413	0.91668	-3997.51
15.3986	8.70528e-05	N01703.N01704	14702891	0.83957	0.92343	-1704.72	1	0.6961	-1697.02	14702891	0.83957	0.95144	-2583.06	0.95176	0.95144	-2583.06	0.87963	0.95865	-2582.48	0.87964	0.96687	0.94316	-2582.4	N01703.N01704	14702891	0.83957	0.96584	0.70487	-4281.86	1	0.69642	0.9515	-4280.08
15.3952	8.72095e-05	I00329	5014201	0.85561	0.61263	-2403.04	0.70541	0.40445	-2395.34	5014201	0.85561	0.65219	-3884.85	0.66699	0.61628	-3884.47	0.67792	0.6443	-3884.69	0.67793	0.66585	0.61628	-3884.45	I00329	5014201	0.85561	0.66791	0.41082	-6190.59	0.70292	0.40172	0.65199	-6189.94
15.393	8.73111e-05	L01880	25777516	0.76471	0.90224	-2529.12	0.96045	0.81858	-2521.42	25777516	0.76471	0.82957	-2969.81	0.82498	0.84223	-2969.72	0.82312	0.8316	-2969.79	0.82329	0.82326	0.84223	-2969.72	L01880	25777516	0.76471	0.86871	0.83414	-5321.75	0.95564	0.81765	0.82933	-5310.91
15.3916	8.73758e-05	C00913.C00914	16358545	0.85027	0.81524	-4430.4	0.76056	0.92381	-4422.7	16358545	0.85027	0.8189	-4587.92	0.79118	0.87508	-4586.11	0.75867	0.83473	-4586.32	0.75847	0.81018	0.86892	-4585.57	C00913.C00914	16358545	0.85027	0.79793	0.93509	-8714.29	0.75776	0.93921	0.81867	-8712.32
15.3892	8.74869e-05	E00249	1281489	0.18717	0.30132	-2194.29	0.22628	0.45225	-2186.59	1281489	0.18717	0.28918	-3594.44	0.25547	0.36112	-3592.1	0.2452	0.30381	-3593.52	0.2452	0.26258	0.35902	-3592.04	E00249	1281489	0.18717	0.27105	0.44182	-5782.75	0.22665	0.45206	0.28946	-5781.03
15.3864	8.76166e-05	L01454	23780426	0.70588	0.86053	-1965.11	0.80231	0.96533	-1957.42	23780426	0.70588	0.84684	-3008.72	0.86681	0.80683	-3007.93	0.89304	0.83305	-3007.57	0.89309	0.84783	0.81469	-3007.41	L01454	23780426	0.70588	0.83239	0.9606	-4967.18	0.80155	0.96508	0.84678	-4966.14
15.3804	8.78953e-05	D00719	3513271	0.37433	0.58886	-788.329	0.49319	0.99007	-780.639	3513271	0.37433	0.65232	-1340.84	0.72444	0.48908	-1337.61	0.90234	0.58601	-1330.21	0.90238	0.60963	0.55116	-1330.08	D00719	3513271	0.37433	0.60342	0.93111	-2125.62	0.49335	0.98957	0.65232	-2121.48
15.3798	8.79232e-05	I00297	3885482	0.3262	0.55523	-2297.18	0.47739	0.70161	-2289.49	3885482	0.3262	0.47344	-3277.39	0.46303	0.50007	-3277.12	0.47292	0.47344	-3277.39	0.47297	0.45291	0.50273	-3277.06	I00297	3885482	0.3262	0.47474	0.69767	-5498.54	0.47752	0.69767	0.47344	-5498.53
15.3768	8.80629e-05	K00138.K00139	621658	0.93048	0.91887	-3036.83	0.9595	0.84134	-3029.15	621658	0.93048	0.94843	-4021.96	0.9414	0.96299	-4021.52	0.94246	0.95045	-4021.89	0.94253	0.94096	0.96299	-4021.52	K00138.K00139	621658	0.93048	0.95283	0.83926	-6911.54	0.96218	0.83894	0.94818	-6911.15
15.3712	8.83243e-05	D02079	17876583	0.58824	0.61815	-3229.96	0.54049	0.78097	-3222.27	17876583	0.58824	0.59128	-3456.42	0.59221	0.58916	-3456.42	0.61199	0.58567	-3456.32	0.61131	0.58115	0.59213	-3456.3	D02079	17876583	0.58824	0.57361	0.77409	-6602.7	0.53789	0.77984	0.59126	-6601.83
15.3644	8.86427e-05	L01412	23507466	0.49198	0.47962	-1789.87	0.40852	0.61529	-1782.19	23507466	0.49198	0.45522	-2533.09	0.44738	0.47725	-2532.9	0.42004	0.46524	-2532.66	0.41999	0.45968	0.47241	-2532.64	L01412	23507466	0.49198	0.43982	0.61038	-4316.17	0.40856	0.61518	0.45517	-4315.28
15.3572	8.89812e-05	N00849	5305445	0.60428	0.64584	-1153.65	0.5309	0.863	-1145.97	5305445	0.60428	0.57275	-1995.76	0.54792	0.62091	-1995.27	0.56219	0.57512	-1995.74	0.56227	0.53973	0.62392	-1995.23	N00849	5305445	0.60428	0.56142	0.85331	-3142.06	0.53098	0.86244	0.5726	-3141.74
15.3548	8.90943e-05	N00556	2781670	0.80214	0.83079	-1154.01	0.90827	0.64988	-1146.33	2781670	0.80214	0.86004	-1927.83	0.85566	0.87742	-1927.72	0.84378	0.86541	-1927.7	0.84414	0.85847	0.87611	-1927.66	N00556	2781670	0.80214	0.87354	0.6677	-3008.32	0.90809	0.65343	0.86002	-3007.16
15.3518	8.92359e-05	K01427	23910540	0.68449	0.50157	-1011.81	0.39973	0.78869	-1004.13	23910540	0.68449	0.61635	-2127.96	0.65358	0.5354	-2126.35	0.63867	0.61057	-2127.86	0.63858	0.66168	0.53254	-2126.28	K01427	23910540	0.68449	0.5596	0.71812	-3141.9	0.40013	0.78835	0.61628	-3132.1
15.351	8.92737e-05	H02464	24410130	0.96791	0.81368	-1443.63	0.91313	0.49965	-1435.95	24410130	0.96791	0.84404	-2062.69	0.85095	0.82627	-2062.64	0.72722	0.86468	-2061.65	0.72722	0.90766	0.80254	-2061.14	H02464	24410130	0.96791	0.86522	0.49548	-3426.69	0.90309	0.48775	0.84381	-3426.14
15.3426	8.96715e-05	N00338	1600978	0.94652	0.7624	-722.741	0.88627	0.33515	-715.07	1600978	0.94652	0.84725	-1470.2	0.88863	0.77127	-1469.32	0.7146	0.86265	-1469.22	0.71461	0.93776	0.7513	-1467.21	N00338	1600978	0.94652	0.85799	0.34963	-2185.5	0.88593	0.33582	0.84671	-2185.27
15.3424	8.9681e-05	E00194.E00195	1027297	0.8984	0.86736	-1618.79	0.97786	0.56546	-1611.12	1027297	0.8984	0.81807	-2493.2	0.82917	0.78866	-2492.99	0.80539	0.81964	-2493.18	0.8053	0.84465	0.78184	-2492.86	E00194.E00195	1027297	0.8984	0.85153	0.61242	-4109.15	0.97794	0.5656	0.8173	-4104.32
15.3386	8.98615e-05	N02237	20117532	0.83957	0.84644	-1781.3	0.79311	0.96559	-1773.63	20117532	0.83957	0.86289	-2075.6	0.82014	0.95488	-2071.83	0.85695	0.86485	-2075.58	0.85721	0.78932	0.96539	-2070.86	N02237	20117532	0.83957	0.83881	0.96112	-3651.21	0.78994	0.96453	0.86292	-3648.43
15.3294	9.03002e-05	M01728	19828599	0.88235	0.87799	-1041.73	0.93289	0.5081	-1034.06	19828599	0.88235	0.91479	-1958.68	0.87249	0.98268	-1956.77	0.81578	0.92793	-1957.28	0.81617	0.88933	0.97653	-1956.32	M01728	19828599	0.88235	0.9209	0.5121	-2992.88	0.93249	0.50825	0.91457	-2992.74
15.329	9.03193e-05	K00478	2399149	0.45989	0.34795	-1591.71	0.23609	0.56666	-1584.04	2399149	0.45989	0.26069	-2603.06	0.22112	0.34766	-2601.17	0.2344	0.26917	-2602.88	0.23431	0.212	0.35007	-2601.11	K00478	2399149	0.45989	0.25408	0.56222	-4187.22	0.23688	0.56669	0.26047	-4187.1
15.3288	9.03289e-05	C01056	17199986	0.90374	0.85964	-1202.34	0.98214	0.54989	-1194.67	17199986	0.90374	0.81859	-2356.46	0.82298	0.80301	-2356.41	0.77623	0.82613	-2356.23	0.77653	0.84201	0.7955	-2356.05	C01056	17199986	0.90374	0.85651	0.65679	-3556.96	0.98083	0.55163	0.81805	-3551.13
15.316	9.0943e-05	I00615.I00616	11758687	0.55615	0.58946	-3628.28	0.51958	0.6982	-3620.63	11758687	0.55615	0.60635	-3723.5	0.55972	0.69649	-3719.24	0.60435	0.60688	-3723.5	0.60436	0.53408	0.70191	-3718.33	I00615.I00616	11758687	0.55615	0.57771	0.6939	-7148.65	0.5195	0.70085	0.60634	-7145.24
15.313	9.10875e-05	A01029	7555440	0.86631	0.79695	-3365.6	0.86993	0.67676	-3357.95	7555440	0.86631	0.85808	-4538.08	0.86512	0.84184	-4537.89	0.87056	0.85482	-4538	0.87052	0.86512	0.84184	-4537.87	A01029	7555440	0.86631	0.86167	0.68093	-7768.01	0.87017	0.67789	0.85827	-7767.92
15.3126	9.11068e-05	H01688.H01689	17377195	0.83422	0.63911	-2607.66	0.72324	0.49435	-2600	17377195	0.83422	0.71081	-3182.25	0.69547	0.74172	-3181.9	0.65745	0.72782	-3181.27	0.65769	0.72261	0.73457	-3181.25	H01688.H01689	17377195	0.83422	0.71459	0.49599	-5782.31	0.72316	0.4939	0.71042	-5782.26
15.3096	9.12516e-05	B01514.B01515.B01516.B01517	16882250	0.91979	0.77173	-3268.98	0.84881	0.61245	-3261.33	16882250	0.91979	0.78351	-4643.55	0.79405	0.75166	-4643.24	0.81083	0.77398	-4643.29	0.81071	0.78937	0.75333	-4643.16	B01514.B01515.B01516.B01517	16882250	0.91979	0.80503	0.61891	-7868.19	0.84797	0.61082	0.78311	-7866.64
15.3072	9.13676e-05	E01399	17114090	0.64171	0.60552	-598.344	0.53648	0.99999	-590.69	17114090	0.64171	0.64155	-1049	0.68432	0.55787	-1047.64	0.71068	0.62847	-1048.41	0.71107	0.67465	0.56152	-1047.53	E01399	17114090	0.64171	0.6053	0.98974	-1642.02	0.53641	0.99998	0.64171	-1639.69
15.303	9.1571e-05	E00622	3668343	0.3262	0.47189	-842.112	0.38894	0.75027	-834.46	3668343	0.3262	0.41008	-1510.25	0.34557	0.54441	-1506.83	0.34514	0.42319	-1509.66	0.34514	0.34577	0.54434	-1506.82	E00622	3668343	0.3262	0.40326	0.74552	-2344.81	0.38942	0.7502	0.41012	-2344.71
15.2954	9.19401e-05	L00657	9377156	0.42246	0.71157	-1649.98	0.61167	0.92595	-1642.34	9377156	0.42246	0.72643	-1760.54	0.72106	0.74283	-1760.48	0.67567	0.74076	-1760.05	0.67566	0.74549	0.73256	-1760.03	L00657	9377156	0.42246	0.69066	0.89422	-3175.6	0.61512	0.91706	0.72641	-3173.02
15.2914	9.2135e-05	A00798	4587367	0.91444	0.91759	-2113.36	0.87808	0.98097	-2105.72	4587367	0.91444	0.89515	-2885.57	0.86777	0.94741	-2881.99	0.84598	0.90842	-2883.64	0.84624	0.88034	0.94526	-2881.58	A00798	4587367	0.91444	0.88941	0.97981	-4949.81	0.87742	0.98093	0.89472	-4949.52
15.2842	9.24869e-05	F01798.F01799	17503507	0.8877	0.78677	-674.8	0.96724	0.15386	-667.158	17503507	0.8877	0.59982	-1293.55	0.50884	0.82437	-1291.19	0.2626	0.69739	-1286.62	0.2626	0.65979	0.7607	-1286.43	F01798.F01799	17503507	0.8877	0.6986	0.22842	-1967.52	0.96716	0.15385	0.59926	-1960.71
15.2762	9.28794e-05	I00952	13777965	0.4385	0.73593	-1647.19	0.6563	0.93611	-1639.55	13777965	0.4385	0.68742	-2952.06	0.65979	0.74131	-2951.06	0.67236	0.69086	-2952.02	0.67212	0.65492	0.7424	-2951.02	I00952	13777965	0.4385	0.67815	0.92847	-4591.9	0.65744	0.9355	0.68775	-4591.62
15.2746	9.29581e-05	J01020.J01021	6416920	0.39037	0.23721	-961.695	0.32072	0.0545	-954.058	6416920	0.39037	0.37119	-1708.9	0.43364	0.23894	-1704.08	0.44323	0.34597	-1707.4	0.44329	0.42759	0.24058	-1704.05	J01020.J01021	6416920	0.39037	0.3558	0.04614	-2663.61	0.32096	0.05427	0.37105	-2662.95
15.2702	9.31749e-05	H01693	17404393	0.52406	0.50613	-989.813	0.58674	0.21752	-982.178	17404393	0.52406	0.55829	-1326.5	0.50507	0.66767	-1324.72	0.45457	0.58338	-1324.76	0.45457	0.53918	0.64787	-1324.17	H01693	17404393	0.52406	0.56826	0.22459	-2308.87	0.58624	0.21769	0.5583	-2308.68
15.2684	9.32638e-05	F00820	3968904	0.54011	0.55452	-947.12	0.41454	0.87439	-939.486	3968904	0.54011	0.46414	-1709.23	0.46833	0.45274	-1709.21	0.54173	0.44674	-1708.6	0.54173	0.43166	0.46866	-1708.54	F00820	3968904	0.54011	0.45098	0.85946	-2649.03	0.41482	0.87372	0.4641	-2648.72
15.266	9.33823e-05	M01799	20197711	0.60963	0.66849	-231.86	0.88358	0.17745	-224.227	20197711	0.60963	0.6669	-583.388	0.71241	0.52847	-581.881	0.76279	0.64898	-582.66	0.76243	0.69595	0.53505	-581.642	M01799	20197711	0.60963	0.70353	0.30393	-811.523	0.88283	0.17835	0.66681	-807.615
15.2336	9.49981e-05	I00966	13853847	0.91444	0.72323	-490.094	0.86576	0.32792	-482.477	13853847	0.91444	0.80944	-1133.04	0.83793	0.73999	-1132.15	0.76348	0.8208	-1132.66	0.76314	0.87996	0.72269	-1130.69	I00966	13853847	0.91444	0.82117	0.35704	-1616.08	0.86601	0.32829	0.80929	-1615.52
15.2178	9.57962e-05	J01772	18683353	0.69519	0.85929	-1421.86	0.94106	0.71597	-1414.26	18683353	0.69519	0.87907	-1853.74	0.8756	0.89323	-1853.68	0.90041	0.87281	-1853.55	0.90042	0.84924	0.91023	-1853.22	J01772	18683353	0.69519	0.89704	0.73173	-3269.94	0.94087	0.71576	0.87899	-3268
15.2174	9.58165e-05	F01893	18080557	0.30481	0.27718	-1765.25	0.33911	0.14079	-1757.64	18080557	0.30481	0.30226	-2493.9	0.29402	0.32522	-2493.69	0.25464	0.31374	-2493.21	0.25453	0.30959	0.31992	-2493.2	F01893	18080557	0.30481	0.31522	0.14397	-4252.1	0.33903	0.14052	0.30241	-4251.54
15.2104	9.61723e-05	N00182	840302	0.8984	0.68324	-1646.58	0.77519	0.44567	-1638.97	840302	0.8984	0.71874	-2366.43	0.72267	0.70374	-2366.39	0.74094	0.71324	-2366.35	0.74026	0.71803	0.70632	-2366.35	N00182	840302	0.8984	0.73691	0.44743	-3892.1	0.7731	0.43682	0.71836	-3891.39
15.208	9.62946e-05	K00969	13832793	0.83957	0.76241	-2783.44	0.90209	0.49448	-2775.84	13832793	0.83957	0.68981	-2936.86	0.69857	0.6649	-2936.81	0.70891	0.68359	-2936.83	0.70976	0.6969	0.6649	-2936.81	K00969	13832793	0.83957	0.76923	0.5304	-5682	0.90389	0.5032	0.68835	-5677.04
15.2028	9.65601e-05	F01271	6749748	0.65775	0.56444	-1027.71	0.46968	0.81758	-1020.11	6749748	0.65775	0.55253	-1492.21	0.58271	0.49361	-1491.55	0.5122	0.5602	-1491.98	0.51205	0.61738	0.47836	-1490.66	F01271	6749748	0.65775	0.52612	0.795	-2513.81	0.46979	0.81719	0.55211	-2512.32
15.2026	9.65704e-05	N02323	20775505	0.72193	0.66726	-1281.57	0.74767	0.50923	-1273.97	20775505	0.72193	0.73357	-2001.63	0.73123	0.74083	-2001.61	0.75946	0.72444	-2001.32	0.75945	0.70688	0.74937	-2001.08	N02323	20775505	0.72193	0.73844	0.52033	-3205.71	0.74984	0.5173	0.73373	-3205.59
15.2014	9.66318e-05	E00927	10217395	0.09091	0.3818	-530.739	0.21602	0.73619	-523.139	10217395	0.09091	0.28534	-957.275	0.25676	0.33675	-956.982	0.52917	0.24893	-953.821	0.52917	0.15651	0.37861	-951.768	E00927	10217395	0.09091	0.26667	0.71051	-1480.93	0.21609	0.73592	0.28513	-1480.41
15.2012	9.6642e-05	C00706.C00707	14910625	0.63102	0.73749	-4234.69	0.67927	0.8309	-4227.09	14910625	0.63102	0.671	-5424.27	0.6693	0.67564	-5424.25	0.61039	0.68862	-5422.67	0.61044	0.70316	0.66971	-5422.41	C00706.C00707	14910625	0.63102	0.67371	0.83487	-9537.63	0.67889	0.83487	0.67118	-9537.6
15.1936	9.70317e-05	H00652	3735744	0.74866	0.60887	-1371.5	0.49966	0.86758	-1363.9	3735744	0.74866	0.6599	-1778.61	0.70365	0.56016	-1777.33	0.74839	0.63615	-1777.53	0.74839	0.67815	0.57073	-1776.98	H00652	3735744	0.74866	0.60863	0.84338	-3146.5	0.49912	0.8673	0.65974	-3142.51
15.1904	9.71963e-05	B00506.B00507	2420539	0.06417	0.06464	-7131.94	0.09848	0.00809	-7124.35	2420539	0.06417	0.06442	-6630.58	0.06552	0.06169	-6630.57	0.04712	0.06991	-6630.13	0.04705	0.07661	0.05886	-6629.94	B00506.B00507	2420539	0.06417	0.07515	0.00946	-13178.8	0.09803	0.00922	0.0644	-13177.3
15.188	9.73199e-05	N01187	8520765	0.74332	0.74225	-2286.15	0.81701	0.61512	-2278.56	8520765	0.74332	0.74148	-3123.68	0.73861	0.74727	-3123.67	0.7862	0.72921	-3122.95	0.78599	0.70778	0.75681	-3122.6	N01187	8520765	0.74332	0.76477	0.62443	-5371.96	0.8157	0.61401	0.74125	-5369.45
15.1828	9.75883e-05	A01115	10763231	0.24599	0.19111	-814.696	0.06074	0.44574	-807.104	10763231	0.24599	0.18857	-1120.15	0.17299	0.21873	-1120.01	0.20604	0.18466	-1120.1	0.20704	0.15169	0.22938	-1119.81	A01115	10763231	0.24599	0.15343	0.39809	-1930.44	0.06051	0.44591	0.18845	-1927.25
15.1758	9.79507e-05	N01090	7868807	0.61497	0.5843	-5310.8	0.48329	0.75795	-5303.21	7868807	0.61497	0.63693	-5067.21	0.64429	0.61743	-5067.13	0.56028	0.65603	-5066.32	0.56028	0.69332	0.60255	-5065.72	N01090	7868807	0.61497	0.58533	0.72557	-9743.46	0.48358	0.7412	0.63687	-9738.72
15.1728	9.81065e-05	H01369	15766180	0.82353	0.67071	-4360.21	0.59844	0.78356	-4352.63	15766180	0.82353	0.69436	-5275.35	0.70321	0.67245	-5275.13	0.66943	0.70341	-5275.08	0.66943	0.73282	0.66523	-5274.36	H01369	15766180	0.82353	0.66435	0.76585	-9290.12	0.60216	0.77286	0.69437	-9286.71
15.1684	9.83353e-05	H01928	18760024	0.1123	0.10289	-1269.7	0.02989	0.28029	-1262.12	18760024	0.1123	0.11477	-2557.74	0.10816	0.13752	-2557.57	0.04334	0.13211	-2556.05	0.04334	0.13674	0.12423	-2556.03	H01928	18760024	0.1123	0.08982	0.26061	-3823.07	0.02969	0.28032	0.11473	-3819.86
15.1664	9.84396e-05	C00906	16298000	0.78075	0.8453	-667.747	0.76987	1	-660.163	16298000	0.78075	0.73568	-1013.54	0.70503	0.79496	-1012.73	0.7526	0.7316	-1013.49	0.75264	0.68197	0.80144	-1012.34	C00906	16298000	0.78075	0.74674	0.99999	-1673.98	0.76994	1	0.73503	-1673.7
15.1638	9.85752e-05	C00835	15909421	0.92513	0.86663	-1311.23	0.96975	0.56496	-1303.65	15909421	0.92513	0.90664	-2064.54	0.94646	0.81669	-2062.86	0.96612	0.90178	-2064.33	0.96556	0.94475	0.81669	-2062.84	C00835	15909421	0.92513	0.92328	0.5832	-3369.25	0.96899	0.56453	0.90612	-3368.19
15.1598	9.87843e-05	L01829	25554577	0.08556	0.15429	-676.308	0	0.69817	-668.728	25554577	0.08556	0.24688	-868.17	0.10623	0.53366	-865.522	0.1929	0.26139	-868.078	0.19333	0.00678	0.57921	-864.927	L01829	25554577	0.08556	0.12995	0.63724	-1541.14	0	0.69806	0.24697	-1536.9
15.1424	9.96988e-05	F02089.F02090	19190674	0.8877	0.86854	-1413.79	0.99996	0.49532	-1406.21	19190674	0.8877	0.86356	-1911.02	0.8871	0.81188	-1910.74	0.69553	0.89464	-1908.96	0.69583	0.95237	0.77576	-1907.45	F02089.F02090	19190674	0.8877	0.90122	0.54019	-3319.77	0.99968	0.49547	0.86308	-3317.24
15.1312	0.000100292	F01161	5674116	0.74866	0.78408	-1114.86	0.71515	0.91175	-1107.3	5674116	0.74866	0.74916	-2253.91	0.7326	0.78075	-2253.44	0.69717	0.7638	-2252.86	0.69688	0.7559	0.77318	-2252.82	F01161	5674116	0.74866	0.73915	0.90753	-3361.67	0.71511	0.91168	0.74896	-3361.21
15.131	0.000100303	M00400	6476314	0.45989	0.55225	-2501.65	0.47925	0.71159	-2494.09	6476314	0.45989	0.4414	-3624.56	0.40766	0.51987	-3622.66	0.3298	0.47912	-3620.18	0.32976	0.4613	0.50532	-3619.95	M00400	6476314	0.45989	0.45408	0.72141	-6082.92	0.4796	0.71799	0.44141	-6082.42
15.125	0.000100622	M01556.M01557.M01558	19020220	0.23529	0.37658	-3673.41	0.28742	0.53814	-3665.85	19020220	0.23529	0.36318	-4902.36	0.34137	0.41584	-4901.68	0.40669	0.34827	-4901.84	0.40676	0.2958	0.42675	-4900.15	M01556.M01557.M01558	19020220	0.23529	0.33973	0.53894	-8444.33	0.28999	0.54563	0.36314	-8442.89
15.1096	0.000101446	C00197	4308310	0.85561	0.87447	-1244.56	0.99287	0.66181	-1237.01	4308310	0.85561	0.91244	-2035.63	0.90456	0.93658	-2035.47	0.90986	0.91294	-2035.62	0.90963	0.89535	0.94103	-2035.43	C00197	4308310	0.85561	0.9297	0.68625	-3274.2	0.99272	0.66177	0.91239	-3272.63
15.1088	0.000101489	J00761	4503047	0.58824	0.65273	-589.247	0.53152	0.91261	-581.693	4503047	0.58824	0.64859	-1111.91	0.61908	0.71419	-1111.22	0.59744	0.65749	-1111.62	0.59743	0.62652	0.71115	-1111.17	J00761	4503047	0.58824	0.61669	0.87536	-1695.86	0.5323	0.91177	0.64868	-1693.6
15.1008	0.00010192	M00915	16036771	0.84492	0.89224	-1706.8	0.94864	0.77098	-1699.25	16036771	0.84492	0.89059	-2331.33	0.87841	0.91264	-2330.98	0.89322	0.88994	-2331.33	0.89322	0.86976	0.91569	-2330.84	M00915	16036771	0.84492	0.90804	0.78255	-4033.34	0.94857	0.77062	0.89056	-4030.59
15.0986	0.000102039	E01513.E01514	17858482	0.59893	0.61672	-2453.61	0.55272	0.74164	-2446.06	17858482	0.59893	0.62304	-3609.37	0.62521	0.61743	-3609.35	0.67427	0.60744	-3608.26	0.6743	0.59436	0.62527	-3608.1	E01513.E01514	17858482	0.59893	0.60055	0.73589	-5970.95	0.55474	0.74025	0.62304	-5968.89
15.0968	0.000102136	J00792.J00793	4723211	0.96791	0.9198	-4930.13	0.95641	0.83949	-4922.58	4723211	0.96791	0.95955	-5634.07	0.94287	0.99784	-5630.22	0.92424	0.97159	-5631.53	0.92424	0.95501	0.99607	-5629.53	J00792.J00793	4723211	0.96791	0.95813	0.84042	-10273.4	0.95621	0.83985	0.9594	-10273.4
15.0962	0.000102169	N00495.N00496	2456077	0.65775	0.81658	-1461.36	0.89096	0.59178	-1453.81	2456077	0.65775	0.82468	-2051.03	0.84942	0.77608	-2050.31	0.80367	0.82832	-2050.95	0.80385	0.86912	0.76793	-2049.8	N00495.N00496	2456077	0.65775	0.8452	0.61218	-3387.23	0.88933	0.59638	0.82407	-3385.7
15.0932	0.000102331	H02522.H02523	24734062	0.11765	0.3287	-1581.77	0.22393	0.55795	-1574.22	24734062	0.11765	0.16251	-2116.22	0.19537	0.08954	-2115.22	0.253	0.13822	-2114.78	0.25293	0.16225	0.10167	-2114.51	H02522.H02523	24734062	0.11765	0.1813	0.56786	-3691.18	0.22361	0.55785	0.16242	-3690.44
15.091	0.000102451	G01254	16432174	0.54011	0.83004	-457.464	0.94474	0.49126	-449.919	16432174	0.54011	0.60754	-628.737	0.59899	0.63407	-628.678	0.78817	0.57875	-627.043	0.78816	0.51384	0.68101	-626.312	G01254	16432174	0.54011	0.7239	0.60846	-1093.58	0.94416	0.49143	0.60753	-1078.66
15.0892	0.000102548	M01387	18171246	0.89305	0.87675	-1515.35	0.81079	1	-1507.81	18171246	0.89305	0.84255	-2349.38	0.81434	0.89346	-2348.41	0.80933	0.85196	-2349.06	0.80927	0.81661	0.89287	-2348.4	M01387	18171246	0.89305	0.83284	1	-3857.49	0.8104	1	0.84255	-3857.19
15.088	0.000102614	L01246	22500229	0.88235	0.91041	-2541.35	0.8456	0.99999	-2533.8	22500229	0.88235	0.89252	-2875.25	0.92354	0.84251	-2874	0.90392	0.89028	-2875.22	0.90347	0.93304	0.83995	-2873.87	L01246	22500229	0.88235	0.87691	0.99999	-5409.9	0.84522	0.99999	0.89253	-5409.05
15.0774	0.000103191	L00860	15298589	0.5615	0.5513	-1817.95	0.67167	0.30588	-1810.41	15298589	0.5615	0.62259	-2687.47	0.6635	0.54822	-2686.6	0.71329	0.60222	-2686.66	0.7135	0.63848	0.55536	-2686.3	L00860	15298589	0.5615	0.63856	0.31307	-4498.23	0.67229	0.30589	0.62263	-4497.88
15.0758	0.000103279	A00587	3133732	0.48128	0.45315	-1044.66	0.54369	0.19653	-1037.13	3133732	0.48128	0.45996	-1471.43	0.4424	0.49296	-1471.25	0.36425	0.4727	-1470.71	0.36417	0.46657	0.48148	-1470.7	A00587	3133732	0.48128	0.48804	0.20896	-2509.93	0.54339	0.19703	0.45999	-2508.56
15.0746	0.000103345	B00891	5908533	0.7754	0.76771	-3595.6	0.8439	0.64135	-3588.07	5908533	0.7754	0.73469	-4195.91	0.74136	0.72061	-4195.82	0.68444	0.74749	-4195.16	0.68443	0.77653	0.71289	-4194.52	B00891	5908533	0.7754	0.7687	0.65726	-7577.35	0.84284	0.64465	0.73452	-7572.7
15.0716	0.000103509	C00050	1515220	0.62032	0.87715	-246.366	1	0.54952	-238.83	1515220	0.62032	0.85811	-367.503	0.86055	0.84875	-367.494	0.91876	0.84004	-366.882	0.91871	0.77739	0.92457	-366.551	C00050	1515220	0.62032	0.89386	0.61541	-610.824	1	0.54942	0.85804	-606.333
15.0702	0.000103586	L01135.L01136	21737137	0.88235	0.51857	-795.233	0.64938	0.14428	-787.698	21737137	0.88235	0.67927	-1531.78	0.65809	0.71961	-1531.53	0.28992	0.72959	-1523.3	0.28992	0.75451	0.68984	-1523.04	L01135.L01136	21737137	0.88235	0.67041	0.13389	-2319.59	0.65105	0.14375	0.6791	-2319.48
15.07	0.000103597	A00208	1006547	0.82888	0.63617	-1074.44	0.50888	1	-1066.9	1006547	0.82888	0.85849	-1802.44	0.85355	0.87358	-1802.41	0.71268	0.87586	-1801.25	0.71266	0.88443	0.85924	-1801.22	A00208	1006547	0.82888	0.75985	0.96119	-2882.09	0.50895	0.99998	0.85824	-2869.34
15.07	0.000103597	F01247	6552843	0.41176	0.28481	-1063.56	0.37542	0.09939	-1056.03	6552843	0.41176	0.29489	-1575.63	0.32338	0.2425	-1574.82	0.35925	0.27817	-1574.71	0.35897	0.30112	0.25036	-1574.47	F01247	6552843	0.41176	0.31863	0.11452	-2633.26	0.37536	0.10026	0.29501	-2631.65
15.0694	0.00010363	N00947	6443892	0.5615	0.45186	-2004.87	0.54379	0.25637	-1997.33	6443892	0.5615	0.537	-3148.34	0.55378	0.49636	-3147.91	0.53083	0.53889	-3148.33	0.53083	0.56926	0.49158	-3147.69	N00947	6443892	0.5615	0.53877	0.25505	-5058.51	0.54484	0.2533	0.53687	-5058.49
15.0608	0.000104103	L01309.L01310	22885396	0.57754	0.7302	-1025.45	0.83017	0.50788	-1017.92	22885396	0.57754	0.66883	-1524.09	0.70035	0.60362	-1523.32	0.71861	0.6557	-1523.61	0.71861	0.68792	0.60971	-1523.23	L01309.L01310	22885396	0.57754	0.71542	0.5506	-2548.1	0.82959	0.50806	0.66865	-2542.01
15.0606	0.000104114	D01831.D01832	15814638	0.68984	0.82799	-2579.4	0.90828	0.64686	-2571.87	15814638	0.68984	0.80095	-3138.14	0.76746	0.8757	-3136.94	0.6952	0.83127	-3135.8	0.6952	0.81148	0.8599	-3135.61	D01831.D01832	15814638	0.68984	0.83928	0.66394	-5713.54	0.90797	0.64687	0.80095	-5710.01
15.0538	0.00010449	H01089	9285762	0.81283	0.94409	-159.461	1	0.66358	-151.934	9285762	0.81283	0.94145	-314.904	0.9588	0.90046	-314.304	0.85076	0.94849	-314.112	0.85089	0.97802	0.88859	-312.675	H01089	9285762	0.81283	0.95749	0.69284	-470.337	1	0.66328	0.94152	-466.838
15.053	0.000104534	J01802	18831103	0.11765	0.12235	-513.021	0.05193	0.3688	-505.495	18831103	0.11765	0.11545	-847.855	0.10044	0.15005	-847.513	0.13921	0.10878	-847.667	0.13924	0.07327	0.16514	-846.731	J01802	18831103	0.11765	0.09697	0.34826	-1355.29	0.05203	0.36941	0.11539	-1353.35
15.0508	0.000104656	F00830	4041992	0.67914	0.65219	-782.006	0.77564	0.37755	-774.48	4041992	0.67914	0.65165	-1537.36	0.65673	0.63389	-1537.31	0.7521	0.62467	-1535.83	0.7521	0.59411	0.66987	-1535.6	F00830	4041992	0.67914	0.68717	0.41719	-2314.48	0.77556	0.37763	0.65124	-2311.84
15.044	0.000105034	F01957	18373849	0.45455	0.42263	-1681.84	0.51512	0.23578	-1674.32	18373849	0.45455	0.46125	-2338.08	0.49715	0.3841	-2337.11	0.48203	0.45493	-2337.97	0.48203	0.51093	0.3757	-2337.03	F01957	18373849	0.45455	0.47818	0.24545	-4013.12	0.51509	0.23653	0.46098	-4012.4
15.0298	0.000105827	E01277	16053676	0.82353	0.61237	-1746.95	0.55264	0.80366	-1739.43	16053676	0.82353	0.62344	-3033.1	0.61563	0.64737	-3032.9	0.66516	0.61137	-3032.51	0.66494	0.58356	0.65585	-3031.78	E01277	16053676	0.82353	0.60031	0.79678	-4774.38	0.55253	0.80314	0.62351	-4772.53
15.0268	0.000105995	H02131	20873955	0.53476	0.60763	-615.182	0.47952	0.84589	-607.668	20873955	0.53476	0.59714	-690.472	0.57152	0.64277	-690.191	0.67419	0.57747	-689.706	0.67419	0.49267	0.67887	-688.348	H02131	20873955	0.53476	0.56114	0.81631	-1300.1	0.48	0.84532	0.59714	-1298.14
15.0254	0.000106074	F01567	15313810	0.68984	0.43339	-566.137	0.57552	0.16201	-558.624	15313810	0.68984	0.59306	-996.419	0.62046	0.54144	-995.926	0.54183	0.60319	-996.117	0.54183	0.65688	0.52801	-995.047	F01567	15313810	0.68984	0.58863	0.15655	-1555.09	0.57683	0.16137	0.59307	-1555.04
15.0228	0.00010622	D01629	13234656	0.91979	0.87246	-1554.78	0.94482	0.58479	-1547.27	13234656	0.91979	0.8965	-2432.59	0.9024	0.88005	-2432.51	0.83431	0.90617	-2432.03	0.83431	0.93174	0.86649	-2431.57	D01629	13234656	0.91979	0.91041	0.59426	-3980.61	0.9446	0.58485	0.89608	-3979.86
15.0104	0.00010692	F00792.F00793	3814798	0.93583	0.87185	-1948.92	0.95988	0.67228	-1941.41	3814798	0.93583	0.87957	-2679.13	0.887	0.8553	-2678.91	0.86055	0.88578	-2678.98	0.86148	0.90804	0.84811	-2678.44	F00792.F00793	3814798	0.93583	0.89783	0.68931	-4471.11	0.95961	0.6662	0.87959	-4468.67
15.0094	0.000106977	M01264	17690830	0.93048	0.91524	-1060.72	0.95888	0.61618	-1053.21	17690830	0.93048	0.96166	-1992.48	0.96059	0.96856	-1992.45	0.96944	0.95768	-1992.38	0.96944	0.95198	0.9728	-1992.28	M01264	17690830	0.93048	0.96071	0.61598	-3045.7	0.95885	0.61598	0.96161	-3045.69
15.0018	0.000107409	G00754	5631522	0.68984	0.81436	-1191.84	0.75317	0.9352	-1184.34	5631522	0.68984	0.81189	-1802.54	0.78481	0.85935	-1801.1	0.83028	0.80763	-1802.41	0.83014	0.76099	0.86478	-1800.18	G00754	5631522	0.68984	0.79382	0.92972	-2988.48	0.75341	0.93508	0.81192	-2986.88
15.0016	0.00010742	L01947	26193993	0.60428	0.77524	-748.657	0.70687	0.98522	-741.156	26193993	0.60428	0.71798	-1173.47	0.7468	0.65614	-1172.62	0.70161	0.72163	-1173.41	0.70142	0.77516	0.64188	-1171.96	L01947	26193993	0.60428	0.71447	0.98243	-1914.66	0.70758	0.9852	0.71792	-1914.62
14.9998	0.000107523	C00673	14652426	0.67914	0.75255	-1044.91	0.67359	0.95478	-1037.41	14652426	0.67914	0.76936	-1643.33	0.80745	0.68751	-1641.62	0.81034	0.75939	-1642.98	0.81012	0.80701	0.68751	-1641.61	C00673	14652426	0.67914	0.73924	0.94375	-2683.13	0.67335	0.9545	0.76899	-2680.74
14.9966	0.000107705	M01421	18315386	0.81283	0.73372	-589.71	0.61039	0.99999	-582.211	18315386	0.81283	0.78312	-958.43	0.82452	0.70467	-957.674	0.78412	0.78279	-958.43	0.78409	0.85635	0.68383	-957.343	M01421	18315386	0.81283	0.73141	0.97172	-1545.26	0.6103	0.99999	0.78274	-1540.64
14.9928	0.000107922	D01775	15293413	0.31551	0.52613	-793.197	0.61161	0.24259	-785.701	15293413	0.31551	0.50029	-1063.2	0.49377	0.51802	-1063.15	0.42973	0.51336	-1062.72	0.43005	0.51696	0.50793	-1062.71	D01775	15293413	0.31551	0.54202	0.26604	-1851.44	0.61158	0.24264	0.50023	-1848.9
14.9924	0.000107945	H01552	16673861	0.31551	0.22283	-305.055	0.10887	0.73438	-297.559	16673861	0.31551	0.17874	-575.078	0.15391	0.22831	-574.941	0.23514	0.16491	-574.801	0.23498	0.06332	0.30479	-573.733	H01552	16673861	0.31551	0.15483	0.71202	-873.36	0.10862	0.73423	0.17845	-872.637
14.9854	0.000108346	D01973	17224521	0.45989	0.7626	-2400.23	0.89397	0.51857	-2392.74	17224521	0.45989	0.76501	-2001.01	0.8078	0.65916	-1999.32	0.84414	0.74111	-1999.37	0.84414	0.77963	0.67747	-1998.82	D01973	17224521	0.45989	0.79648	0.55291	-3900.45	0.90071	0.48909	0.76504	-3896.23
14.9846	0.000108392	L00684	9918830	0.64706	0.77732	-1593.71	0.70643	0.93755	-1586.22	9918830	0.64706	0.79103	-2085.06	0.76951	0.83117	-2084.5	0.74828	0.79929	-2084.69	0.74867	0.77905	0.82749	-2084.4	L00684	9918830	0.64706	0.76368	0.92514	-3641.99	0.70561	0.93587	0.79104	-3639.61
14.9834	0.000108461	N00854	5328487	0.71658	0.54019	-365.888	0.66664	0.26361	-358.396	5328487	0.71658	0.71658	-989.617	0.71902	0.70946	-989.606	0.66712	0.72897	-989.124	0.66729	0.74739	0.6959	-988.909	N00854	5328487	0.71658	0.70584	0.24883	-1348.47	0.66673	0.26363	0.7169	-1348.01
14.9812	0.000108588	I00961	13828131	0.48128	0.45882	-702.59	0.37541	0.80755	-695.1	13828131	0.48128	0.51707	-1561.7	0.51749	0.51579	-1561.7	0.55579	0.50772	-1561.43	0.55578	0.49834	0.52265	-1561.38	I00961	13828131	0.48128	0.47628	0.75926	-2261.27	0.37554	0.80726	0.51711	-2256.8
14.979	0.000108714	F02134.F02135	19391157	0.49198	0.60198	-1699.51	0.52813	0.74283	-1692.02	19391157	0.49198	0.53151	-3141.35	0.53151	0.53125	-3141.35	0.5266	0.53304	-3141.34	0.52659	0.53505	0.53009	-3141.33	F02134.F02135	19391157	0.49198	0.53066	0.74023	-4755.68	0.52869	0.74023	0.53152	-4755.68
14.9738	0.000109014	L01647.L01648.L01649	24750724	0.91444	0.71115	-3278.73	0.82157	0.48363	-3271.25	24750724	0.91444	0.7584	-4686.75	0.822	0.62102	-4683.49	0.85654	0.72751	-4684.99	0.85687	0.80075	0.62852	-4683.19	L01647.L01648.L01649	24750724	0.91444	0.77749	0.49445	-7958.76	0.82095	0.48375	0.75771	-7958
14.9738	0.000109014	F01915	18165376	0.31551	0.29803	-737.322	0.1637	0.64381	-729.835	18165376	0.31551	0.30474	-1151.03	0.26763	0.3796	-1150.61	0.35596	0.29401	-1150.85	0.35595	0.21549	0.40965	-1149.86	F01915	18165376	0.31551	0.25886	0.60375	-1883.22	0.16351	0.64365	0.3047	-1880.87
14.9674	0.000109385	N00912	5940407	0.20856	0.35937	-2903.35	0.29521	0.49583	-2895.86	5940407	0.20856	0.32269	-4034.9	0.31879	0.33375	-4034.85	0.24408	0.34478	-4032.34	0.24365	0.35953	0.32348	-4032.11	N00912	5940407	0.20856	0.31378	0.49234	-6931.14	0.29548	0.49579	0.32292	-6930.77
14.9652	0.000109512	J01537	17171833	0.79144	0.70591	-892.612	0.62448	0.89181	-885.129	17171833	0.79144	0.697	-1592.39	0.70058	0.68166	-1592.33	0.68765	0.69892	-1592.37	0.68773	0.71129	0.6753	-1592.24	J01537	17171833	0.79144	0.6753	0.87681	-2479.11	0.62441	0.89112	0.69681	-2477.52
14.9644	0.000109559	K00625	3355060	0.93583	0.81904	-3100.3	0.88113	0.65647	-3092.82	3355060	0.93583	0.83233	-4176.43	0.83759	0.81769	-4176.35	0.78311	0.84748	-4175.58	0.7829	0.87374	0.80664	-4174.94	K00625	3355060	0.93583	0.84954	0.65765	-7237.64	0.88045	0.65308	0.83232	-7236.59
14.956	0.000110048	A01113	10742186	0.45455	0.53661	-3618.8	0.45754	0.69068	-3611.33	10742186	0.45455	0.51718	-4092.92	0.51036	0.5335	-4092.82	0.50663	0.52034	-4092.89	0.50657	0.50914	0.5335	-4092.82	A01113	10742186	0.45455	0.49705	0.67824	-7313.41	0.4556	0.68541	0.51745	-7312.18
14.954	0.000110164	D01148.D01149	5769755	0.64706	0.7666	-2249.68	0.6881	0.90117	-2242.2	5769755	0.64706	0.79601	-3085.04	0.79584	0.79441	-3085.04	0.84506	0.782	-3084.11	0.84511	0.76636	0.80295	-3083.9	D01148.D01149	5769755	0.64706	0.76271	0.88739	-5331.39	0.68713	0.90125	0.79603	-5327.25
14.9536	0.000110188	K01204	20978390	0.59893	0.39485	-832.779	0.28094	0.67362	-825.303	20978390	0.59893	0.38212	-1335.72	0.3587	0.43632	-1335.28	0.30657	0.40282	-1334.84	0.30666	0.38809	0.42623	-1334.76	K01204	20978390	0.59893	0.35241	0.64787	-2162.73	0.28098	0.67344	0.38218	-2161.03
14.9506	0.000110363	N02941.N02942	24205122	0.8984	0.86595	-1745.94	0.81356	0.99999	-1738.47	24205122	0.8984	0.84329	-2609.76	0.82371	0.88663	-2608.9	0.84288	0.84364	-2609.76	0.84221	0.81607	0.88916	-2608.77	N02941.N02942	24205122	0.8984	0.83425	0.99988	-4348.66	0.81315	0.99993	0.84333	-4348.23
14.9476	0.000110539	C01361.C01362	18679309	0.72193	0.81478	-1209.35	0.88184	0.56663	-1201.88	18679309	0.72193	0.86801	-1948.33	0.89002	0.81337	-1947.53	0.93933	0.84844	-1946.2	0.93928	0.85882	0.83232	-1946.14	C01361.C01362	18679309	0.72193	0.87247	0.57024	-3150.3	0.88163	0.56665	0.86824	-3150.21
14.9424	0.000110844	I00035.I00036	335382	0.59893	0.6387	-4316.79	0.57174	0.76523	-4309.32	335382	0.59893	0.58696	-5068.05	0.57651	0.61366	-5067.77	0.56855	0.59204	-5067.94	0.5685	0.57638	0.61366	-5067.75	I00035.I00036	335382	0.59893	0.58356	0.76779	-8920.64	0.57667	0.76779	0.58696	-8920.6
14.942	0.000110867	F00309	1454707	0.93048	0.82449	-1853.73	0.89443	0.63234	-1846.26	1454707	0.93048	0.8453	-2088.62	0.84284	0.85399	-2088.6	0.81699	0.85154	-2088.44	0.81699	0.85266	0.84895	-2088.44	F00309	1454707	0.93048	0.86275	0.64072	-3935.76	0.89472	0.63224	0.84491	-3934.88
14.9412	0.000110914	F00610	2850844	0.80749	0.86428	-1917.74	0.81744	0.96869	-1910.26	2850844	0.80749	0.86172	-3373.45	0.8735	0.83661	-3372.94	0.86936	0.85932	-3373.4	0.86975	0.87604	0.83586	-3372.93	F00610	2850844	0.80749	0.84763	0.96343	-5285.08	0.81757	0.96858	0.86164	-5283.71
14.9394	0.00011102	K00410	1955125	0.90909	0.8353	-523.601	0.92037	0.44616	-516.131	1955125	0.90909	0.82197	-1228.13	0.81569	0.84431	-1228.05	0.70925	0.84898	-1226.21	0.70925	0.86672	0.81556	-1226.04	K00410	1955125	0.90909	0.85179	0.4842	-1746.73	0.92092	0.44777	0.82168	-1744.26
14.92	0.000112168	K01008	14661605	0.3262	0.35857	-3647.28	0.42879	0.25009	-3639.82	14661605	0.3262	0.35541	-4204.41	0.34576	0.37753	-4204.13	0.30797	0.36845	-4203.57	0.30793	0.36324	0.37525	-4203.55	K01008	14661605	0.3262	0.37918	0.24663	-7723.09	0.42701	0.24226	0.35591	-7720.94
14.918	0.000112286	M01360	18047843	0.68449	0.82127	-2484.41	0.75216	0.98214	-2476.95	18047843	0.68449	0.70094	-3739.47	0.66171	0.78658	-3737.48	0.63746	0.71626	-3738.64	0.63746	0.67376	0.78348	-3737.34	M01360	18047843	0.68449	0.71622	0.98839	-6217.1	0.75013	0.98228	0.70061	-6216.42
14.9086	0.000112847	H02118	20701263	0.94118	0.80864	-1615.15	0.91231	0.50306	-1607.69	20701263	0.94118	0.92047	-2707.63	0.92271	0.9106	-2707.61	0.90218	0.92553	-2707.5	0.90161	0.93648	0.90246	-2707.35	H02118	20701263	0.94118	0.91837	0.50167	-4264.71	0.91178	0.50434	0.92021	-4264.68
14.9072	0.000112931	F02071	19098892	0.73797	0.91223	-2627.94	0.85744	1	-2620.48	19098892	0.73797	0.89462	-3086.1	0.88478	0.9167	-3085.88	0.88435	0.89668	-3086.07	0.88457	0.87892	0.91856	-3085.86	F02071	19098892	0.73797	0.8822	0.99999	-5673.49	0.85695	1	0.89433	-5672.99
14.904	0.000113123	F02032	18880340	0.68449	0.73166	-681.139	0.64596	0.94341	-673.687	18880340	0.68449	0.65351	-1136.58	0.63466	0.69307	-1136.17	0.55377	0.68665	-1133.59	0.55369	0.70211	0.66558	-1133.47	F02032	18880340	0.68449	0.65124	0.94146	-1810.28	0.64646	0.94326	0.65301	-1810.26
14.9026	0.000113207	K00380	1798861	0.59893	0.27977	-363.155	0.13268	0.95564	-355.704	1798861	0.59893	0.26256	-621.623	0.33394	0.12946	-620.875	0.90125	0.15799	-609.066	0.90125	0.13039	0.21329	-608.926	K00380	1798861	0.59893	0.21034	0.92407	-978.327	0.13252	0.95602	0.26245	-977.327
14.89	0.000113966	J00090	414861	0.16578	0.5783	-521.271	0.72808	3e-05	-513.826	414861	0.16578	0.53269	-1477.22	0.50763	0.61106	-1476.72	0.7392	0.46875	-1471.4	0.73894	0.37692	0.66309	-1468.17	J00090	414861	0.16578	0.57508	0.09492	-1994.85	0.72796	6e-05	0.53269	-1991.05
14.8838	0.000114341	F01340	8126516	0.81283	0.495	-1288.06	0.59203	0.21344	-1280.62	8126516	0.81283	0.50867	-1761.65	0.53685	0.44742	-1761	0.5331	0.50324	-1761.58	0.5331	0.53861	0.44701	-1761	F01340	8126516	0.81283	0.53767	0.23735	-3010.46	0.59599	0.21895	0.50851	-3009.1
14.879	0.000114632	K00325	1497843	0.47594	0.25264	-649.506	0.37186	0.02828	-642.067	1497843	0.47594	0.27107	-975.676	0.29479	0.22515	-975.441	0.2103	0.28732	-975.1	0.2103	0.36849	0.17771	-973.895	K00325	1497843	0.47594	0.30245	0.0518	-1619.39	0.37117	0.02866	0.27156	-1617.74
14.872	0.000115058	B00284.B00285	1290736	0.78075	0.77074	-5270.73	0.85198	0.64243	-5263.3	1290736	0.78075	0.7906	-5193.88	0.83539	0.71467	-5191.45	0.90456	0.76137	-5190.31	0.90472	0.79385	0.72443	-5189.69	B00284.B00285	1290736	0.78075	0.81194	0.63804	-10090.7	0.85443	0.63284	0.79033	-10089.2
14.8678	0.000115315	D01885	16506512	0.59893	0.44578	-3997.9	0.53542	0.26548	-3990.46	16506512	0.59893	0.42914	-4600.72	0.42451	0.43997	-4600.69	0.30964	0.46352	-4597.78	0.30964	0.5005	0.41828	-4597.25	D01885	16506512	0.59893	0.46363	0.29634	-8334.82	0.5309	0.28596	0.42917	-8332.46
14.8582	0.000115903	C00312	8748967	0.39572	0.36762	-1730.37	0.44179	0.1678	-1722.94	8748967	0.39572	0.32766	-2493.82	0.32449	0.33803	-2493.8	0.26384	0.3472	-2492.61	0.2638	0.36492	0.32052	-2492.44	C00312	8748967	0.39572	0.36586	0.18875	-4220.75	0.44228	0.16801	0.32777	-4216.77
14.8526	0.000116248	M00104	630016	0.94652	0.7946	-1173.42	0.92034	0.30585	-1166	630016	0.94652	0.8833	-1778.02	0.92533	0.73753	-1777.17	0.76323	0.93079	-1776.57	0.76323	1	0.68587	-1773.25	M00104	630016	0.94652	0.89628	0.31368	-2944.16	0.92034	0.30608	0.88261	-2944.01
14.8382	0.000117139	G00287	1699767	0.48128	0.84993	-161.443	0.96834	0.21124	-154.024	1699767	0.48128	0.9044	-270.117	0.86884	0.97096	-269.646	0.93717	0.90003	-270.029	0.93717	0.84027	0.99068	-269.243	G00287	1699767	0.48128	0.92201	0.24702	-424.959	0.96842	0.21118	0.90445	-424.141
14.8344	0.000117375	H01701	17439691	0.28342	0.22657	-2620.71	0.29888	0.09218	-2613.29	17439691	0.28342	0.2234	-3107.35	0.2049	0.26014	-3106.79	0.13692	0.24803	-3104.31	0.13689	0.25083	0.24414	-3104.3	H01701	17439691	0.28342	0.24745	0.09466	-5677.93	0.29939	0.08458	0.22339	-5675.68
14.8316	0.000117549	G01292	17013730	0.39572	0.54376	-3775.06	0.47713	0.67459	-3767.65	17013730	0.39572	0.54678	-5048.5	0.54381	0.55377	-5048.47	0.56964	0.5406	-5048.31	0.56997	0.52994	0.55601	-5048.18	G01292	17013730	0.39572	0.52552	0.66253	-8649.98	0.47997	0.66649	0.54675	-8648.15
14.8298	0.000117662	L01970	26278737	0.90909	0.92457	-1539.99	0.88209	0.99131	-1532.57	26278737	0.90909	0.91086	-2450.66	0.90206	0.92649	-2450.35	0.8478	0.92746	-2447.55	0.8477	0.93825	0.91493	-2447.3	L01970	26278737	0.90909	0.90228	0.98962	-3984	0.88194	0.99135	0.91093	-3983.23
14.8244	0.000117999	H00097	458571	0.59358	0.69903	-858.083	0.79233	0.47652	-850.671	458571	0.59358	0.68024	-1955.45	0.65631	0.73626	-1954.59	0.65038	0.69138	-1955.13	0.65036	0.66007	0.73496	-1954.57	H00097	458571	0.59358	0.71052	0.51704	-2809.76	0.7919	0.47704	0.68037	-2806.12
14.813	0.000118714	M01082	16824934	0.6631	0.41482	-1343.4	0.50096	0.20419	-1335.99	16824934	0.6631	0.44006	-1995.06	0.47167	0.37461	-1994.16	0.40481	0.44848	-1994.86	0.4046	0.5059	0.36336	-1993.3	M01082	16824934	0.6631	0.4606	0.21171	-3331.88	0.50117	0.20452	0.44033	-3331.05
14.8	0.000119536	L00430	5808137	0.31551	0.57612	-1997.11	0.46995	0.78785	-1989.71	5808137	0.31551	0.56912	-2970.23	0.50868	0.67898	-2967.98	0.69075	0.54524	-2968.65	0.69043	0.42633	0.70427	-2963.65	L00430	5808137	0.31551	0.53621	0.77433	-4961.71	0.46927	0.78781	0.56903	-4959.94
14.7876	0.000120324	J01281	13752976	0.64171	0.54661	-1931.98	0.63025	0.35495	-1924.58	13752976	0.64171	0.58948	-2716.55	0.60796	0.55473	-2716.18	0.56997	0.59405	-2716.47	0.56996	0.62779	0.54915	-2715.82	J01281	13752976	0.64171	0.60317	0.36122	-4641.6	0.62993	0.35496	0.58945	-4641.13
14.7874	0.000120337	C00445	11156289	0.80749	0.69326	-662.225	0.60661	0.90926	-654.831	11156289	0.80749	0.71665	-1386.48	0.69521	0.7584	-1385.88	0.57975	0.74673	-1383.01	0.57974	0.74571	0.7482	-1383.01	C00445	11156289	0.80749	0.68368	0.88201	-2044.35	0.60671	0.90921	0.71652	-2041.31
14.7728	0.000121272	M00486	7210274	0.87166	0.80174	-1375.44	0.86021	0.62108	-1368.06	7210274	0.87166	0.86001	-1689.18	0.8731	0.83769	-1688.91	0.81808	0.86774	-1688.7	0.81808	0.89799	0.82929	-1687.83	M00486	7210274	0.87166	0.86	0.62131	-3057.24	0.86	0.62131	0.86	-3057.24
14.769	0.000121517	C00650	14430086	0.83957	0.78525	-2233.11	0.7178	0.90595	-2225.73	14430086	0.83957	0.73659	-3071.29	0.72093	0.76959	-3070.92	0.70856	0.74442	-3071.03	0.70871	0.7287	0.76698	-3070.85	C00650	14430086	0.83957	0.73043	0.90489	-5297.13	0.71762	0.90478	0.73589	-5297.02
14.7642	0.000121827	J00739.J00740	4391546	0.56684	0.67776	-346.309	0.83115	0.31867	-338.926	4391546	0.56684	0.82871	-702.783	0.84479	0.79232	-702.548	0.76871	0.84261	-702.221	0.76873	0.88466	0.77488	-701.358	J00739.J00740	4391546	0.56684	0.82906	0.31973	-1041.71	0.83114	0.3188	0.82869	-1041.71
14.7632	0.000121891	G00339	2151682	0.39572	0.43496	-2384.89	0.36114	0.55885	-2377.51	2151682	0.39572	0.4679	-2826.92	0.44586	0.51168	-2826.15	0.39198	0.49079	-2824.78	0.39199	0.4836	0.4998	-2824.75	G00339	2151682	0.39572	0.43379	0.54416	-5167.83	0.36115	0.55579	0.46815	-5163.28
14.756	0.000122358	F01048.F01049	5053854	0.77005	0.84476	-3434.73	0.78009	0.99998	-3427.36	5053854	0.77005	0.77256	-4770.13	0.79537	0.71644	-4769.39	0.83518	0.74937	-4768.92	0.83523	0.76626	0.7241	-4768.76	F01048.F01049	5053854	0.77005	0.7751	0.99998	-8197.5	0.77991	0.99998	0.7725	-8197.48
14.7542	0.000122474	B00364	1699794	0.89305	0.90059	-750.319	1	0.60847	-742.942	1699794	0.89305	0.92821	-1425.88	0.95292	0.85253	-1424.51	1	0.90276	-1422.14	1	0.91916	0.87021	-1421.91	B00364	1699794	0.89305	0.94119	0.63492	-2170.54	0.99999	0.60852	0.92818	-2168.82
14.7392	0.000123453	D01147	5765768	0.52406	0.5998	-2453.21	0.68536	0.43182	-2445.84	5765768	0.52406	0.60972	-3502.82	0.62953	0.5718	-3502.42	0.50346	0.6358	-3500.32	0.50332	0.70562	0.5424	-3497.78	D01147	5765768	0.52406	0.63361	0.43443	-5904.91	0.68556	0.42199	0.60972	-5903.23
14.7378	0.000123544	N01235	8811329	0.75401	0.79592	-2098.05	0.87601	0.51492	-2090.68	8811329	0.75401	0.78134	-2276.79	0.81853	0.7076	-2275.85	0.73704	0.79148	-2276.56	0.73704	0.85796	0.69224	-2274.77	N01235	8811329	0.75401	0.81591	0.52995	-4369.59	0.87524	0.51434	0.78135	-4367.48
14.7372	0.000123584	A00635	3461071	0.53476	0.63044	-336.082	0.53928	0.99573	-328.714	3461071	0.53476	0.60608	-589.672	0.60655	0.604	-589.672	0.61795	0.60298	-589.656	0.61793	0.60124	0.60854	-589.654	A00635	3461071	0.53476	0.58273	0.98356	-919.052	0.53929	0.99578	0.60608	-918.385
14.7308	0.000124004	F00444	2060094	0.58824	0.54839	-401.918	0.76312	0.11888	-394.553	2060094	0.58824	0.6349	-1032.51	0.58438	0.73253	-1031.81	0.43756	0.66822	-1030.33	0.43705	0.65178	0.68955	-1030.3	F00444	2060094	0.58824	0.66054	0.1728	-1428.3	0.76284	0.11887	0.63488	-1427.07
14.7298	0.00012407	E00273	1430599	0.60963	0.61851	-640.496	0.53674	0.9485	-633.131	1430599	0.60963	0.6659	-1345.11	0.66006	0.68506	-1345.03	0.66229	0.66667	-1345.1	0.66236	0.6523	0.68988	-1345.01	E00273	1430599	0.60963	0.62667	0.89719	-1982.08	0.53726	0.94789	0.66598	-1978.24
14.728	0.000124188	E01773	23946888	0.68984	0.83964	-1204.58	0.77806	0.99999	-1197.21	23946888	0.68984	0.81865	-2077.11	0.87066	0.70316	-2074.17	0.83616	0.81397	-2077.03	0.8359	0.89614	0.69314	-2073.64	E01773	23946888	0.68984	0.80395	1	-3274.82	0.77813	1	0.81865	-3274.32
14.726	0.00012432	I00552	11110068	0.72727	0.57759	-416.013	0.40269	1	-408.65	11110068	0.72727	0.57699	-646.01	0.5647	0.60555	-645.964	0.61388	0.56889	-645.962	0.61461	0.52181	0.62487	-645.81	I00552	11110068	0.72727	0.51368	0.99996	-1056.43	0.40283	1	0.57688	-1054.66
14.7256	0.000124346	J01863	19157393	0.62032	0.4515	-676.631	0.61887	0.07157	-669.268	19157393	0.62032	0.55046	-830.3	0.55969	0.52267	-830.248	0.56956	0.54437	-830.274	0.5696	0.56209	0.52157	-830.242	J01863	19157393	0.62032	0.57321	0.08588	-1499.93	0.61873	0.07262	0.55029	-1499.57
14.7178	0.000124862	J01235	12888870	0.52941	0.46095	-1390.19	0.53027	0.24934	-1382.83	12888870	0.52941	0.60385	-2199.13	0.61799	0.5739	-2198.79	0.54701	0.62046	-2198.08	0.547	0.6606	0.56373	-2196.72	J01235	12888870	0.52941	0.58062	0.24094	-3535.34	0.52949	0.2537	0.60385	-3533.43
14.716	0.000124981	E01107	13667506	0.39037	0.69587	-412.568	0.8159	0.18828	-405.21	13667506	0.39037	0.65888	-748.927	0.66166	0.64895	-748.918	0.73658	0.64323	-748.469	0.73658	0.62953	0.6652	-748.427	E01107	13667506	0.39037	0.7083	0.26973	-1157.42	0.81569	0.18843	0.65867	-1154.14
14.7148	0.000125061	G00928	8534854	0.80214	0.3009	-189.852	0.0998	0.71727	-182.495	8534854	0.80214	0.37685	-343.238	0.36309	0.40556	-343.182	0.27138	0.39699	-342.586	0.2714	0.40592	0.38243	-342.571	G00928	8534854	0.80214	0.31559	0.6029	-531.452	0.10028	0.71696	0.37698	-525.732
14.7128	0.000125194	C00919	16387080	0.20321	0.25739	-2227.92	0.19435	0.39015	-2220.56	16387080	0.20321	0.1989	-3043.05	0.20241	0.18944	-3042.99	0.22851	0.19065	-3042.6	0.22851	0.18895	0.19336	-3042.59	C00919	16387080	0.20321	0.19743	0.38698	-5263.62	0.19444	0.39001	0.19902	-5263.61
14.7126	0.000125207	E01802	24166676	0.65241	0.58763	-395.195	0.69633	0.08166	-387.839	24166676	0.65241	0.61849	-687.945	0.60193	0.65219	-687.863	0.3771	0.66092	-684.82	0.3771	0.70521	0.58969	-684.466	E01802	24166676	0.65241	0.64532	0.10426	-1076.51	0.69599	0.08186	0.61808	-1075.78
14.7074	0.000125553	E00049.E00050	273932	0.96791	0.89667	-2766.12	0.95251	0.78469	-2758.77	273932	0.96791	0.96959	-4034.38	0.95984	0.99999	-4032.87	0.96719	0.9704	-4034.37	0.96719	0.95513	1	-4032.79	E00049.E00050	273932	0.96791	0.96373	0.78142	-6760.53	0.95232	0.78142	0.96963	-6760.16
14.7042	0.000125766	F00175.F00176.F00177	785163	0.82888	0.8791	-4820.5	0.83252	0.99999	-4813.15	785163	0.82888	0.87523	-5242.15	0.84978	0.92364	-5240.39	0.86353	0.8778	-5242.1	0.86372	0.84405	0.92364	-5240.32	F00175.F00176.F00177	785163	0.82888	0.86085	0.99995	-10022.8	0.83193	0.99998	0.87503	-10021.8
14.697	0.000126247	A00094.A00095	429403	0.90374	0.83039	-1192.4	0.90856	0.57079	-1185.05	429403	0.90374	0.86879	-1830.79	0.87585	0.84991	-1830.66	0.69916	0.89829	-1825.96	0.69915	0.96048	0.80347	-1822.82	A00094.A00095	429403	0.90374	0.88161	0.5756	-2982.04	0.9096	0.56043	0.86861	-2981.39
14.6954	0.000126354	D02169	18362014	0.19251	0.26019	-2607.31	0.15599	0.54758	-2599.96	18362014	0.19251	0.3971	-3476.34	0.39044	0.41621	-3476.29	0.25964	0.43047	-3474.43	0.25957	0.44792	0.40189	-3474.32	D02169	18362014	0.19251	0.32155	0.49788	-5984.75	0.15422	0.52598	0.3973	-5976.35
14.694	0.000126448	B00557	2694293	0.70588	0.75136	-1241	0.8453	0.39792	-1233.65	2694293	0.70588	0.77903	-1856.99	0.78117	0.77266	-1856.98	0.81456	0.77294	-1856.84	0.81409	0.77083	0.77617	-1856.84	B00557	2694293	0.70588	0.79892	0.42086	-3091.58	0.84499	0.3981	0.77867	-3090.64
14.6856	0.000127013	K01014	14735333	0.83957	0.69116	-973.502	0.77292	0.42916	-966.159	14735333	0.83957	0.78264	-1642.29	0.78335	0.77896	-1642.29	0.70423	0.80084	-1640.89	0.70387	0.83047	0.75075	-1640.36	K01014	14735333	0.83957	0.77964	0.42743	-2608.48	0.77264	0.4297	0.78258	-2608.45
14.6832	0.000127175	F00468	2163560	0.04813	0.07375	-2601.91	0.02932	0.1473	-2594.56	2163560	0.04813	0.0902	-3195.48	0.09317	0.0809	-3195.41	0.08835	0.09073	-3195.47	0.08839	0.09819	0.07876	-3195.36	F00468	2163560	0.04813	0.07	0.13494	-5759.63	0.02773	0.14464	0.09016	-5754.48
14.6818	0.000127269	K01077.K01078	16396997	0.35294	0.37023	-5306.24	0.44168	0.25068	-5298.9	16396997	0.35294	0.40101	-5845.43	0.4115	0.37196	-5845.12	0.36031	0.41381	-5844.83	0.36144	0.45643	0.35722	-5843.63	K01077.K01078	16396997	0.35294	0.41419	0.25278	-10952.5	0.44129	0.25041	0.40111	-10951.9
14.6782	0.000127513	H02213	22142392	0.87166	0.70694	-1290.82	0.85541	0.20163	-1283.48	22142392	0.87166	0.7435	-2201.84	0.707	0.82637	-2201.41	0.61537	0.78159	-2200.79	0.61428	0.76391	0.80862	-2200.74	H02213	22142392	0.87166	0.77873	0.22505	-3486.27	0.85626	0.20193	0.74274	-3485.33
14.6732	0.000127851	C00412	10062516	0.44385	0.59593	-198.124	0.39868	1	-190.787	10062516	0.44385	0.42094	-746.318	0.40857	0.4504	-746.229	0.46292	0.41582	-746.219	0.46292	0.3956	0.45694	-746.045	C00412	10062516	0.44385	0.41716	1	-937.145	0.39883	1	0.42093	-937.106
14.673	0.000127865	N01702	14701141	0.85561	0.80601	-1406.46	0.73529	0.94572	-1399.13	14701141	0.85561	0.77908	-1972.02	0.78669	0.75632	-1971.84	0.81537	0.77037	-1971.64	0.81557	0.77742	0.76064	-1971.61	N01702	14701141	0.85561	0.76527	0.94024	-3371.84	0.73484	0.94564	0.779	-3371.15
14.6646	0.000128436	A00110	486728	0.44385	0.39387	-2908.59	0.32632	0.51721	-2901.25	486728	0.44385	0.37631	-3264.15	0.39641	0.33715	-3263.47	0.37499	0.37683	-3264.14	0.37499	0.40966	0.3334	-3263.26	A00110	486728	0.44385	0.35974	0.51347	-6075	0.32648	0.51698	0.37613	-6073.9
14.663	0.000128545	D02066	17798789	0.48128	0.43595	-3193.49	0.51716	0.30156	-3186.16	17798789	0.48128	0.38739	-3522.52	0.42239	0.31956	-3520.94	0.38501	0.38842	-3522.52	0.38509	0.44926	0.31264	-3520.38	D02066	17798789	0.48128	0.43005	0.31516	-6646.76	0.51595	0.30422	0.38788	-6641.56
14.6626	0.000128572	K01338	23405110	0.90909	0.82708	-2406.61	0.87766	0.6851	-2399.27	23405110	0.90909	0.92039	-3221.7	0.92039	0.92039	-3221.7	0.88907	0.92745	-3221.06	0.88917	0.93554	0.91696	-3220.91	K01338	23405110	0.90909	0.90586	0.68083	-5622.6	0.87783	0.68489	0.9203	-5620.97
14.6618	0.000128627	I01123	14731996	0.22995	0.33937	-470.467	0.17501	0.68401	-463.136	14731996	0.22995	0.28183	-710.134	0.23733	0.3778	-709.574	0.16285	0.30043	-709.056	0.16261	0.27252	0.34451	-708.986	I01123	14731996	0.22995	0.2546	0.63256	-1174.77	0.17544	0.68319	0.28189	-1173.27
14.6602	0.000128736	I00967.I00968	13860986	0.78075	0.70886	-4047.46	0.77387	0.59297	-4040.13	13860986	0.78075	0.74589	-5172.76	0.7372	0.76667	-5172.51	0.64659	0.77449	-5168.61	0.64614	0.78621	0.75806	-5168.43	I00967.I00968	13860986	0.78075	0.75441	0.59489	-8841.12	0.77201	0.59313	0.74534	-8840.77
14.6596	0.000128777	M01478	18596287	0.79679	0.61482	-1468.07	0.77715	0.18993	-1460.74	18596287	0.79679	0.59214	-1572.45	0.59678	0.57235	-1572.43	0.65726	0.57464	-1572.23	0.65726	0.56406	0.59201	-1572.22	M01478	18596287	0.79679	0.65438	0.2375	-2933.09	0.77682	0.19427	0.59143	-2930.69
14.6576	0.000128914	L01163	22036856	0.47059	0.1794	-1443.69	0.24409	0	-1436.36	22036856	0.47059	0.25097	-2327.18	0.30868	0.13691	-2323.88	0.27803	0.24378	-2327.04	0.27803	0.32469	0.13302	-2323.69	L01163	22036856	0.47059	0.24841	0	-3763.55	0.24407	0	0.25084	-3763.54
14.6552	0.000129078	K00836	10227935	0.81818	0.88653	-3129.04	0.83361	0.95017	-3121.71	10227935	0.81818	0.902	-3291.54	0.88047	0.93886	-3290.03	0.90027	0.9025	-3291.54	0.9002	0.86964	0.94139	-3289.74	K00836	10227935	0.81818	0.88098	0.94582	-6037.87	0.83786	0.94899	0.90211	-6034.75
14.6542	0.000129147	N02340	20907320	0.70053	0.58894	-2036.1	0.65411	0.41034	-2028.77	20907320	0.70053	0.63127	-2241.82	0.63008	0.63355	-2241.82	0.66517	0.62229	-2241.5	0.66518	0.60898	0.64055	-2241.38	N02340	20907320	0.70053	0.639	0.41267	-4270.8	0.65403	0.41034	0.63098	-4270.6
14.6528	0.000129243	A00916	5634613	0.19786	0.12179	-3202.41	0.07712	0.20554	-3195.08	5634613	0.19786	0.11437	-3940.38	0.1164	0.10917	-3940.35	0.13311	0.10901	-3940.08	0.13322	0.1073	0.11166	-3940.07	A00916	5634613	0.19786	0.10189	0.19768	-6933.43	0.07639	0.20137	0.11428	-6931.74
14.6494	0.000129476	K00224	1030355	0.42246	0.34754	-636.646	0.45253	0.1264	-629.321	1030355	0.42246	0.46362	-1483.4	0.45891	0.47757	-1483.37	0.46553	0.46331	-1483.4	0.46559	0.45216	0.48071	-1483.36	K00224	1030355	0.42246	0.46028	0.12468	-2112.74	0.45284	0.1262	0.46367	-2112.72
14.6456	0.000129737	K00351	1645522	0.76471	0.81137	-1511.76	0.89832	0.64043	-1504.43	1645522	0.76471	0.8807	-1841.05	0.88427	0.87019	-1841.01	0.82055	0.89728	-1839.78	0.82111	0.93014	0.84719	-1838.88	K00351	1645522	0.76471	0.88558	0.64517	-3345.61	0.89779	0.64073	0.88068	-3345.49
14.6428	0.00012993	C00797.C00798	15627600	0.5615	0.51396	-2006.32	0.44702	0.66073	-1999	15627600	0.5615	0.47263	-3252.17	0.4581	0.50433	-3251.8	0.4409	0.4814	-3251.83	0.44085	0.46801	0.50162	-3251.68	C00797.C00798	15627600	0.5615	0.46377	0.66	-5212.25	0.44696	0.66314	0.4726	-5211.99
14.641	0.000130054	D00113	512130	0.70053	0.487	-380.482	0.27845	0.97802	-373.161	512130	0.70053	0.53434	-530.727	0.53588	0.5292	-530.726	0.43409	0.55344	-530.377	0.43409	0.59024	0.49311	-530.253	D00113	512130	0.70053	0.458	0.87875	-907.58	0.27928	0.97754	0.53442	-903.889
14.6368	0.000130344	F01821	17629307	0.29947	0.18767	-3446.65	0.29588	0.0331	-3439.34	17629307	0.29947	0.15522	-4296.22	0.15232	0.16389	-4296.2	0.11094	0.16645	-4295.93	0.11094	0.17065	0.15879	-4295.92	F01821	17629307	0.29947	0.19812	0.03568	-7703.18	0.29593	0.03391	0.15526	-7700.05
14.6336	0.000130566	D00023	130089	0.86096	0.84473	-1634.62	0.90894	0.62587	-1627.3	130089	0.86096	0.7896	-2376.44	0.79563	0.76885	-2376.35	0.78378	0.79083	-2376.44	0.78389	0.80662	0.76413	-2376.28	D00023	130089	0.86096	0.8305	0.64427	-4008.62	0.90858	0.62587	0.78908	-4003.75
14.6326	0.000130635	H00546	3241683	0.26203	0.16138	-744.124	0.04031	0.70202	-736.808	3241683	0.26203	0.11281	-1288.62	0.11539	0.10592	-1288.61	0.34968	0.08753	-1286.77	0.34968	0.06981	0.12347	-1286.63	H00546	3241683	0.26203	0.0874	0.67572	-2026.18	0.04025	0.70139	0.1128	-2025.43
14.6298	0.000130829	F00427	1987991	0.19251	0.18046	-804.749	0.11765	0.40242	-797.434	1987991	0.19251	0.16062	-1132.56	0.14225	0.19621	-1132.12	0.16062	0.16062	-1132.56	0.1604	0.1334	0.19943	-1132.01	F00427	1987991	0.19251	0.14506	0.39019	-1930.88	0.11709	0.40149	0.16062	-1930
14.6292	0.000130871	C00699	14861824	0.60963	0.49702	-997.48	0.41178	0.72476	-990.166	14861824	0.60963	0.46563	-1558.97	0.46827	0.45771	-1558.96	0.53741	0.44412	-1557.79	0.53741	0.41732	0.48147	-1557.52	C00699	14861824	0.60963	0.44856	0.71312	-2549.84	0.41178	0.72448	0.46558	-2549.14
14.629	0.000130885	A00209	1009290	0.80749	0.86212	-2733.82	0.81809	0.95067	-2726.51	1009290	0.80749	0.82558	-3015.16	0.8291	0.8174	-3015.11	0.86621	0.81563	-3014.34	0.86623	0.80982	0.82242	-3014.3	A00209	1009290	0.80749	0.8225	0.94923	-5652.45	0.81693	0.94999	0.82537	-5652.4
14.623	0.000131302	N02255	20282806	0.47594	0.34025	-3824.18	0.26341	0.49784	-3816.87	20282806	0.47594	0.28419	-4237.92	0.23972	0.36573	-4235.05	0.28633	0.28405	-4237.92	0.28608	0.21461	0.37168	-4234.27	N02255	20282806	0.47594	0.27693	0.4907	-7859.77	0.26063	0.4935	0.28419	-7859.56
14.6206	0.00013147	J00444	2068678	0.89305	0.91931	-1517.46	0.87337	1	-1510.15	2068678	0.89305	0.91078	-1970.73	0.92606	0.88466	-1969.95	0.95583	0.89874	-1968.97	0.95595	0.90702	0.8894	-1968.87	J00444	2068678	0.89305	0.89835	1	-3482.04	0.87353	1	0.91068	-3480.88
14.6202	0.000131497	K00087	413564	0.49198	0.38728	-1618.03	0.46595	0.20513	-1610.72	413564	0.49198	0.43211	-1968.46	0.43533	0.4221	-1968.44	0.44442	0.42858	-1968.43	0.44443	0.43234	0.42331	-1968.43	K00087	413564	0.49198	0.44346	0.20831	-3579.48	0.46575	0.20507	0.43216	-3579.18
14.618	0.000131651	H00023	127678	0.24599	0.28375	-925.62	0.37359	0.08051	-918.311	127678	0.24599	0.30943	-1139.43	0.29181	0.34636	-1139.23	0.20397	0.33549	-1137.57	0.20384	0.34761	0.31585	-1137.51	H00023	127678	0.24599	0.33108	0.09014	-2058.62	0.37347	0.08047	0.30974	-2057.74
14.6166	0.000131749	I00791	12804649	0.38503	0.42644	-3195.37	0.33622	0.5813	-3188.06	12804649	0.38503	0.4014	-3859.68	0.37967	0.44438	-3859.19	0.36289	0.41166	-3859.34	0.36291	0.38876	0.44111	-3859.11	I00791	12804649	0.38503	0.38136	0.57629	-6807.95	0.33613	0.58577	0.40114	-6806.83
14.6094	0.000132253	M00406	6555345	0.71658	0.91351	-955.91	0.98032	0.80656	-948.606	6555345	0.71658	0.87286	-1845.67	0.87714	0.85779	-1845.58	0.87359	0.87285	-1845.67	0.87362	0.88487	0.85301	-1845.54	M00406	6555345	0.71658	0.90199	0.84906	-2802.2	0.97997	0.80695	0.87302	-2794.28
14.6008	0.000132858	M01087	16841905	0.33155	0.40751	-1495.69	0.33555	0.54191	-1488.39	16841905	0.33155	0.41236	-2778.79	0.37286	0.49843	-2775.87	0.40517	0.41454	-2778.77	0.40504	0.34934	0.50532	-2775.27	M01087	16841905	0.33155	0.38865	0.53222	-4269.59	0.33566	0.54185	0.41179	-4267.18
14.5996	0.000132943	N01139	8156433	0.7754	0.82364	-2284.3	0.75854	0.97497	-2277	8156433	0.7754	0.78731	-2801.63	0.78483	0.79387	-2801.61	0.84778	0.77031	-2800.55	0.84778	0.74145	0.80736	-2800.08	N01139	8156433	0.7754	0.7774	0.97227	-5078.91	0.75854	0.97229	0.7873	-5078.64
14.5986	0.000133013	E01047	12853253	0.72727	0.94161	-3625.13	0.90698	1	-3617.83	12853253	0.72727	0.92204	-3872.49	0.90134	0.96158	-3870.48	0.855	0.94032	-3869.47	0.85496	0.92598	0.95892	-3868.91	E01047	12853253	0.72727	0.91731	0.99999	-7411.16	0.90726	1	0.92189	-7410.97
14.5966	0.000133155	H00423	2585160	0.77005	0.69148	-2336.47	0.83406	0.33268	-2329.17	2585160	0.77005	0.68494	-3281.99	0.68089	0.69897	-3281.98	0.63737	0.69863	-3281.78	0.63724	0.70231	0.69077	-3281.77	H00423	2585160	0.77005	0.72751	0.36602	-5613.45	0.83368	0.33294	0.68505	-5611.16
14.5952	0.000133254	B00271	1214332	0.91979	0.88366	-1654.91	0.82436	0.99996	-1647.61	1214332	0.91979	0.87154	-3117.98	0.84384	0.92281	-3116.34	0.87843	0.86958	-3117.96	0.87843	0.82245	0.92851	-3115.72	B00271	1214332	0.91979	0.85665	0.99356	-4766.6	0.82318	0.99961	0.87152	-4765.59
14.5928	0.000133423	J00794	4726605	0.63636	0.37984	-1534.03	0.26658	0.65513	-1526.74	4726605	0.63636	0.27289	-1910.65	0.29608	0.22748	-1910.25	0.43578	0.24388	-1907.62	0.43506	0.23808	0.25358	-1907.6	J00794	4726605	0.63636	0.27142	0.65308	-3437.39	0.26666	0.65523	0.27269	-3437.38
14.5872	0.00013382	B00537	2575000	0.82353	0.94294	-833.591	0.98531	0.77515	-826.297	2575000	0.82353	0.94954	-1376.6	0.94087	0.96511	-1376.4	0.96508	0.94716	-1376.51	0.96497	0.93329	0.96744	-1376.16	B00537	2575000	0.82353	0.96303	0.786	-2204.6	0.98511	0.77487	0.94953	-2202.9
14.5862	0.000133891	M01351.M01352	18033527	0.91444	0.88416	-1469.9	0.9349	0.72485	-1462.61	18033527	0.91444	0.87981	-1764.15	0.86868	0.90401	-1763.9	0.87169	0.88185	-1764.13	0.87169	0.86584	0.90538	-1763.9	M01351.M01352	18033527	0.91444	0.89972	0.73872	-3228.93	0.93494	0.72455	0.87959	-3226.76
14.5834	0.000134091	M00452	6890724	0.59893	0.59998	-3327.52	0.52037	0.77178	-3320.23	6890724	0.59893	0.61459	-4342.28	0.60249	0.64705	-4342	0.65611	0.60315	-4341.9	0.65504	0.55769	0.66294	-4340.96	M00452	6890724	0.59893	0.58062	0.7683	-7555.86	0.51486	0.78029	0.61447	-7553.12
14.5804	0.000134304	D00253.D00254	1153701	0.44385	0.38792	-2850.41	0.46168	0.24038	-2843.12	1153701	0.44385	0.40628	-3501.3	0.4438	0.32941	-3499.46	0.38287	0.41286	-3501.15	0.38255	0.48242	0.31818	-3498.18	D00253.D00254	1153701	0.44385	0.42583	0.23782	-6274.2	0.46259	0.23153	0.40632	-6273.14
14.5746	0.000134718	M00503.M00504	7721110	0.55615	0.74483	-1697.78	0.66444	0.9967	-1690.49	7721110	0.55615	0.68756	-2722.66	0.71119	0.64524	-2722.13	0.67719	0.68983	-2722.64	0.67718	0.73032	0.63779	-2721.82	M00503.M00504	7721110	0.55615	0.68113	0.98945	-4413.29	0.66561	0.99602	0.68768	-4413.15
14.564	0.000135478	L00429	5802521	0.3369	0.51555	-813.034	0.41895	0.71854	-805.752	5802521	0.3369	0.46155	-1110.04	0.48185	0.41998	-1109.65	0.47124	0.45887	-1110.02	0.47124	0.48848	0.41717	-1109.62	L00429	5802521	0.3369	0.44867	0.70818	-1916.22	0.41904	0.71804	0.46152	-1915.79
14.562	0.000135622	E00207	1093994	0.44385	0.4768	-801.037	0.37364	0.72232	-793.756	1093994	0.44385	0.40043	-1652.94	0.3107	0.59082	-1645.75	0.30973	0.42116	-1651.77	0.30973	0.31045	0.59102	-1645.75	E00207	1093994	0.44385	0.39279	0.7172	-2446.82	0.37415	0.72199	0.40041	-2446.7
14.5498	0.000136503	B01273	14926599	0.2246	0.17237	-2824.53	0.08254	0.40064	-2817.26	14926599	0.2246	0.15958	-3391.36	0.14709	0.19779	-3391.1	0.12319	0.16971	-3391.12	0.12288	0.15163	0.19576	-3391.01	B01273	14926599	0.2246	0.13274	0.37714	-6140.98	0.08297	0.39078	0.15958	-6139.5
14.5418	0.000137084	C01330.C01331	18550384	0.91979	0.89321	-1513.34	0.96294	0.71042	-1506.06	18550384	0.91979	0.90162	-2612.67	0.89903	0.90883	-2612.64	0.89937	0.90213	-2612.67	0.89903	0.89685	0.91004	-2612.64	C01330.C01331	18550384	0.91979	0.9182	0.72662	-4120.69	0.96248	0.71063	0.90122	-4118.73
14.5378	0.000137375	K00698	5274202	0.92513	0.81485	-1524.13	0.87637	0.65741	-1516.86	5274202	0.92513	0.85964	-2244.32	0.88859	0.79821	-2242.04	0.8891	0.85044	-2243.75	0.8892	0.88859	0.79821	-2242.04	K00698	5274202	0.92513	0.86451	0.6664	-3721.48	0.87598	0.66289	0.85974	-3721.31
14.5372	0.000137419	E00298	1548619	0.74332	0.45287	-1425.7	0.61357	0.08044	-1418.43	1548619	0.74332	0.50323	-2221.8	0.57139	0.36274	-2220.14	0.49975	0.50323	-2221.8	0.50058	0.60363	0.35331	-2219.8	E00298	1548619	0.74332	0.53407	0.10063	-3641.11	0.61368	0.08055	0.50317	-3640.23
14.5312	0.000137857	L01198.L01199	22256763	0.96791	0.83058	-2804.64	0.92249	0.64603	-2797.37	22256763	0.96791	0.93009	-3652.17	0.92908	0.93347	-3652.17	0.98613	0.9222	-3651.63	0.98588	0.90934	0.94039	-3651.5	L01198.L01199	22256763	0.96791	0.92795	0.64735	-6365.19	0.92232	0.64895	0.9301	-6365.17
14.5278	0.000138106	H00723	4559430	0.86096	0.84013	-1340.72	0.92194	0.65908	-1333.45	4559430	0.86096	0.89351	-2154.34	0.92955	0.82307	-2152.38	0.9522	0.88021	-2153.23	0.9526	0.9191	0.82859	-2152.17	H00723	4559430	0.86096	0.90148	0.66667	-3488.13	0.92128	0.65922	0.89331	-3487.79
14.5274	0.000138136	D01790	15416565	0.75936	0.55793	-1314.29	0.63813	0.37409	-1307.02	15416565	0.75936	0.55812	-1457.99	0.5623	0.54478	-1457.95	0.59125	0.55093	-1457.8	0.59125	0.55129	0.55022	-1457.8	D01790	15416565	0.75936	0.58687	0.39033	-2766.92	0.63785	0.37467	0.55789	-2765.01
14.5274	0.000138136	K00538	2786062	0.58289	0.52183	-1101.3	0.60526	0.30053	-1094.04	2786062	0.58289	0.5771	-2036.01	0.56997	0.6016	-2035.88	0.45571	0.61033	-2032.54	0.45571	0.63411	0.57169	-2032.22	K00538	2786062	0.58289	0.58568	0.30617	-3130.26	0.60497	0.30055	0.57711	-3130.05
14.5126	0.000139225	A00593	3173868	0.27273	0.53033	-549.299	0.71649	0.04863	-542.043	3173868	0.27273	0.67934	-878.04	0.70996	0.60734	-877.839	0.86663	0.63379	-876.403	0.86657	0.61924	0.66132	-876.371	A00593	3173868	0.27273	0.69018	0.05869	-1420.17	0.71504	0.0499	0.67949	-1420.08
[truncated: 13,954 more rows]

## Sheet: male2014
LRT	P-value	gene	pos	qLines	Q0 2013	LL0 2013	q adult 2013	q male 2013	LL1 2013	pos again	qLines	Q0 2014	LL0 2014	q adult 2014	q male 2014	LL1 2014	q loser 2014	q winner 2014	LL2 2014	q loser 2014	q winner 2014	q male	LL3 2014	gene	pos	qLines	Qa 13	Qm 13	LL0	Qa13	qm13	qz14	LL1
[truncated: 15,360 more rows]

[truncated: 2 more sheets: viability2014, Change2013-2014]
