# Supplementary material for: Predicting evolutionary change at the DNA level in a natural Mimulus population
Source: PLoS Genet. 2021 Jan 13;17(1):e1008945. doi: 10.1371/journal.pgen.1008945 (PMC7837469; doi:10.1371/journal.pgen.1008945)
Supplement: S7 Table — (XLSX) [file pgen.1008945.s007.xlsx]

## Sheet: Sheet1
Posterior probabilities for offspring as outcrossed.								Posterior probabilities for maternal inbreeding history (0=fully outcrossed, 1 = 1st generation selfed, etc)
Blue highlight indicates called as selfed.
year	Offspring name	family number	offspring ID within maternal family	loci called	Probability outcrossed			year	plant name	family	loci	IH=0	IH=1	IH=2	IH=3	IH=4	IH=5	IH=6	IH=7+
2014	progeny.1-11-4.3	218	3	2772	1			2013	336	144	2763	1	0	0	0	0	0	0	0
2014	progeny.1-2-5.2	224	2	2771	1			2013	327	135	2752	1	0	0	0	0	0	0	0
2014	progeny.2-11-4.3	274	3	2771	1			2014	par.2-13-5	285	2751	1	0	0	0	0	0	0	0
2014	progeny.1-10-1.1	213	1	2770	1			2013	298	106	2748	1	0	0	0	0	0	0	0
2014	progeny.1-9-1.1	256	1	2770	1			2013	320	128	2747	1	0	0	0	0	0	0	0
2014	progeny.3-2-5.1	365	1	2769	1			2013	328	136	2746	1	0	0	0	0	0	0	0
2014	progeny.3-4-2.2	372	2	2768	0			2013	306	114	2742	1	0	0	0	0	0	0	0
2014	progeny.1-10-4.1	216	1	2768	1			2013	209	17	2738	1	0	0	0	0	0	0	0
2014	progeny.2-4-3.1	313	1	2768	1			2013	361	169	2736	1	0	0	0	0	0	0	0
2014	progeny.1-9-5.2	260	2	2765	1			2013	294	102	2734	1	0	0	0	0	0	0	0
2014	progeny.1-8-2.3	252	3	2764	1			2013	350	158	2733	1	0	0	0	0	0	0	0
2014	progeny.2-6-4.3	324	3	2762	1			2013	266	74	2731	1	0	0	0	0	0	0	0
2013	progeny253.4	61	4	2760	1			2013	242	50	2730	1	0	0	0	0	0	0	0
2014	progeny.2-15-1.3	291	3	2760	1			2014	par.2-6-5	325	2730	1	0	0	0	0	0	0	0
2014	progeny.2-15-5.1	295	1	2760	1			2013	337	145	2728	1	0	0	0	0	0	0	0
2013	progeny328.2	136	2	2759	1			2013	241	49	2725	1	0	0	0	0	0	0	0
2014	progeny.3-4-4.3	374	3	2759	1			2013	270	78	2725	1	0	0	0	0	0	0	0
2014	progeny.2-9-5.3	340	3	2758	1			2014	par.2-13-4	284	2720	1	0	0	0	0	0	0	0
2014	progeny.1-10-1.3	213	3	2756	1			2013	291	99	2714	1	0	0	0	0	0	0	0
2014	progeny.2-7-2.4	327	4	2755	1			2014	par.3-7-5	390	2714	1	0	0	0	0	0	0	0
2014	progeny.2-10-5.2	270	2	2754	1			2013	351	159	2709	1	0	0	0	0	0	0	0
2014	progeny.2-11-5.2	275	2	2753	1			2013	353	161	2709	1	0	0	0	0	0	0	0
2014	progeny.2-11-5.3	275	3	2751	0			2014	par.3-3-1	366	2709	1	0	0	0	0	0	0	0
2014	progeny.2-1-1.1	261	1	2751	1			2013	359	167	2701	1	0	0	0	0	0	0	0
2014	progeny.3-11-1.1	351	1	2751	1			2013	323	131	2700	1	0	0	0	0	0	0	0
2014	progeny.3-2-3.4	363	4	2751	1			2014	par.1-3-3	227	2698	1	0	0	0	0	0	0	0
2014	progeny.3-5-3.4	378	4	2751	1			2014	par.2-14-5	290	2695	1	0	0	0	0	0	0	0
2014	progeny.3-15-3.3	360	3	2749	1			2013	255	63	2693	1	0	0	0	0	0	0	0
2014	progeny.2-8-1.1	331	1	2748	1			2013	371	179	2692	1	0	0	0	0	0	0	0
2014	progeny.3-2-2.4	362	4	2748	1			2013	198	6	2681	1	0	0	0	0	0	0	0
2014	progeny.1-10-3.4	215	4	2747	1			2013	245	53	2678	1	0	0	0	0	0	0	0
2014	progeny.2-15-1.1	291	1	2746	1			2013	356	164	2672	1	0	0	0	0	0	0	0
2014	progeny.2-6-4.1	324	1	2746	1			2013	317	125	2670	1	0	0	0	0	0	0	0
2013	progeny355.4	163	4	2745	1			2014	par.2-16-5	300	2669	1	0	0	0	0	0	0	0
2014	progeny.3-11-3.2	353	2	2745	1			2013	348	156	2667	1	0	0	0	0	0	0	0
2014	progeny.3-15-2.3	359	3	2745	1			2014	par.1-4-1	230	2667	1	0	0	0	0	0	0	0
2014	progeny.2-15-1.2	291	2	2743	0			2013	259	67	2646	1	0	0	0	0	0	0	0
2014	progeny.1-9-5.1	260	1	2743	1			2013	292	100	2640	1	0	0	0	0	0	0	0
2014	progeny.3-10-1.4	346	4	2742	1			2013	308	116	2636	1	0	0	0	0	0	0	0
2014	progeny.3-8-5.3	395	3	2742	1			2013	366	174	2634	1	0	0	0	0	0	0	0
2014	progeny.2-15-3.4	293	4	2741	1			2013	249	57	2632	1	0	0	0	0	0	0	0
2013	progeny362.2	170	2	2737	1			2013	282	90	2632	1	0	0	0	0	0	0	0
2014	progeny.1-10-4.2	216	2	2736	1			2013	246	54	2631	1	0	0	0	0	0	0	0
2014	progeny.2-2-2.4	302	4	2735	1			2013	313	121	2626	1	0	0	0	0	0	0	0
2014	progeny.3-4-2.3	372	3	2730	0			2013	296	104	2623	1	0	0	0	0	0	0	0
2014	progeny.2-11-5.1	275	1	2729	1			2013	324	132	2619	1	0	0	0	0	0	0	0
2014	progeny.2-3-2.1	307	1	2729	1			2013	200	8	2614	1	0	0	0	0	0	0	0
2014	progeny.1-11-4.2	218	2	2728	1			2013	230	38	2607	1	0	0	0	0	0	0	0
2014	progeny.3-12-1.4	356	4	2727	1			2013	329	137	2606	1	0	0	0	0	0	0	0
2013	progeny384.2	192	2	2726	1			2013	284	92	2604	1	0	0	0	0	0	0	0
2014	progeny.1-9-5.3	260	3	2726	1			2013	377	185	2597	1	0	0	0	0	0	0	0
2014	progeny.2-14-2.1	287	1	2721	1			2013	250	58	2591	1	0	0	0	0	0	0	0
2014	progeny.3-12-2.2	357	2	2719	1			2013	334	142	2583	1	0	0	0	0	0	0	0
2014	progeny.3-6-1.1	381	1	2718	1			2013	364	172	2578	1	0	0	0	0	0	0	0
2014	progeny.3-4-4.2	374	2	2717	1			2013	221	29	2570	1	0	0	0	0	0	0	0
2014	progeny.2-9-2.4	337	4	2714	1			2013	243	51	2561	1	0	0	0	0	0	0	0
2013	progeny361.4	169	4	2709	1			2013	293	101	2557	1	0	0	0	0	0	0	0
2014	progeny.3-8-5.1	395	1	2708	1			2014	par.1-10-5	217	2534	1	0	0	0	0	0	0	0
2013	progeny271.4	79	4	2707	1			2014	par.2-3-4	309	2534	1	0	0	0	0	0	0	0
2013	progeny372.4	180	4	2707	1			2014	par.2-4-1	311	2530	1	0	0	0	0	0	0	0
2014	progeny.2-15-2.4	292	4	2706	1			2013	326	134	2529	1	0	0	0	0	0	0	0
2014	progeny.3-10-1.3	346	3	2704	1			2013	331	139	2520	1	0	0	0	0	0	0	0
2013	progeny319.4	127	4	2703	1			2013	283	91	2517	1	0	0	0	0	0	0	0
2013	progeny330.3	138	3	2696	1			2013	232	40	2510	1	0	0	0	0	0	0	0
2014	progeny.1-11-4.4	218	4	2695	1			2013	357	165	2505	1	0	0	0	0	0	0	0
2013	progeny398.2	206	2	2691	1			2013	267	75	2500	1	0	0	0	0	0	0	0
2014	progeny.3-6-1.2	381	2	2690	0			2013	305	113	2490	1	0	0	0	0	0	0	0
2013	progeny303.3	111	3	2687	1			2014	par.1-9-5	260	2486	0	1	0	0	0	0	0	0
2014	progeny.3-10-1.1	346	1	2683	1			2013	197	5	2484	1	0	0	0	0	0	0	0
2014	progeny.3-4-4.4	374	4	2682	1			2014	par.2-4-4	314	2483	1	0	0	0	0	0	0	0
2013	progeny251.4	59	4	2680	1			2013	208	16	2482	1	0	0	0	0	0	0	0
2014	progeny.2-3-4.4	309	4	2680	1			2013	330	138	2478	1	0	0	0	0	0	0	0
2014	progeny.2-16-4.1	299	1	2679	1			2013	238	46	2477	1	0	0	0	0	0	0	0
2014	progeny.1-9-1.3	256	3	2678	1			2013	297	105	2477	1	0	0	0	0	0	0	0
2014	progeny.3-6-4.4	384	4	2676	1			2013	304	112	2477	1	0	0	0	0	0	0	0
2013	progeny366.4	174	4	2672	1			2013	344	152	2473	1	0	0	0	0	0	0	0
2014	progeny.1-10-1.2	213	2	2672	1			2013	338	146	2472	1	0	0	0	0	0	0	0
2013	progeny303.2	111	2	2671	1			2014	par.1-2-2	221	2470	1	0	0	0	0	0	0	0
2013	progeny248.2	56	2	2669	1			2014	par.2-6-1	321	2470	1	0	0	0	0	0	0	0
2014	progeny.3-8-5.2	395	2	2669	1			2013	360	168	2467	1	0	0	0	0	0	0	0
2014	progeny.3-2-2.3	362	3	2665	1			2013	289	97	2453	1	0	0	0	0	0	0	0
2014	progeny.2-7-2.3	327	3	2663	1			2013	195	3	2447	1	0	0	0	0	0	0	0
2013	progeny226.2	34	2	2662	0			2013	199	7	2446	1	0	0	0	0	0	0	0
2014	progeny.1-3-2.2	226	2	2660	1			2013	285	93	2432	1	0	0	0	0	0	0	0
2014	progeny.1-4-3.4	232	4	2660	1			2013	276	84	2428	1	0	0	0	0	0	0	0
2014	progeny.2-4-2.4	312	4	2656	1			2013	381	189	2423	1	0	0	0	0	0	0	0
2013	progeny248.4	56	4	2654	1			2013	314	122	2421	1	0	0	0	0	0	0	0
2014	progeny.3-2-3.2	363	2	2652	1			2013	228	36	2416	1	0	0	0	0	0	0	0
2014	progeny.2-10-1.3	266	3	2651	1			2014	par.2-9-3	338	2384	1	0	0	0	0	0	0	0
2013	progeny246.1	54	1	2649	1			2014	par.1-6-2	242	2383	1	0	0	0	0	0	0	0
2014	progeny.3-4-2.1	372	1	2649	1			2014	par.2-5-5	320	2358	1	0	0	0	0	0	0	0
2014	progeny.2-16-3.2	298	2	2646	1			2013	223	31	2346	1	0	0	0	0	0	0	0
2013	progeny367.1	175	1	2644	1			2013	254	62	2340	1	0	0	0	0	0	0	0
2014	progeny.2-11-1.3	271	3	2643	1			2013	310	118	2337	1	0	0	0	0	0	0	0
2014	progeny.2-6-3.1	323	1	2642	1			2014	par.1-1-4	211	2323	1	0	0	0	0	0	0	0
2014	progeny.3-2-3.1	363	1	2642	1			2014	par.2-8-5	335	2322	1	0	0	0	0	0	0	0
2013	progeny255.1	63	1	2641	0			2013	345	153	2317	1	0	0	0	0	0	0	0
2014	progeny.1-10-1.4	213	4	2638	1			2013	212	20	2308	1	0	0	0	0	0	0	0
2014	progeny.2-10-2.4	267	4	2635	1			2014	par.1-8-5	255	2308	1	0	0	0	0	0	0	0
2014	progeny.3-8-2.3	392	3	2634	0			2013	341	149	2302	1	0	0	0	0	0	0	0
2014	progeny.3-7-4.1	389	1	2634	1			2013	281	89	2301	1	0	0	0	0	0	0	0
2013	progeny350.1	158	1	2632	1			2013	257	65	2297	1	0	0	0	0	0	0	0
2014	progeny.1-8-2.4	252	4	2632	1			2013	373	181	2296	1	0	0	0	0	0	0	0
2013	Progeny.270.1	78	1	2631	1			2014	par.3-8-3	393	2296	1	0	0	0	0	0	0	0
2013	progeny359.4	167	4	2631	1			2013	244	52	2289	1	0	0	0	0	0	0	0
2013	progeny240.3	48	3	2626	1			2013	290	98	2289	1	0	0	0	0	0	0	0
2014	progeny.3-5-2.2	377	2	2626	1			2013	375	183	2288	1	0	0	0	0	0	0	0
2013	progeny324.3	132	3	2625	1			2013	376	184	2274	1	0	0	0	0	0	0	0
2014	progeny.2-10-4.4	269	4	2625	1			2013	222	30	2271	1	0	0	0	0	0	0	0
2013	progeny359.2	167	2	2616	1			2013	287	95	2248	1	0	0	0	0	0	0	0
2013	progeny256.4	64	4	2615	1			2014	par.3-1-2	342	2241	1	0	0	0	0	0	0	0
2014	progeny.2-6-3.4	323	4	2615	1			2013	262	70	2232	1	0	0	0	0	0	0	0
2013	progeny259.4	67	4	2614	1			2013	312	120	2232	1	0	0	0	0	0	0	0
2013	progeny290.3	98	3	2611	1			2013	374	182	2227	1	0	0	0	0	0	0	0
2013	progeny356.3	164	3	2611	1			2013	362	170	2220	1	0	0	0	0	0	0	0
2014	progeny.1-8-2.2	252	2	2611	1			2013	206	14	2218	1	0	0	0	0	0	0	0
2014	progeny.3-7-4.4	389	4	2610	1			2013	301	109	2211	1	0	0	0	0	0	0	0
2014	progeny.1-3-4.2	228	2	2609	0			2013	260	68	2174	1	0	0	0	0	0	0	0
2014	progeny.2-16-3.4	298	4	2609	1			2013	318	126	2162	1	0	0	0	0	0	0	0
2013	progeny378.4	186	4	2608	1			2013	321	129	2162	1	0	0	0	0	0	0	0
2014	progeny.2-6-3.2	323	2	2603	1			2014	par.3-5-2	377	2162	1	0	0	0	0	0	0	0
2014	progeny.2-6-4.2	324	2	2603	1			2013	235	43	2157	1	0	0	0	0	0	0	0
2014	progeny.3-4-4.1	374	1	2600	1			2013	370	178	2155	1	0	0	0	0	0	0	0
2014	progeny.3-11-1.4	351	4	2597	1			2014	par.1-4-5	234	2152	1	0	0	0	0	0	0	0
2013	progeny332.4	140	4	2596	1			2013	302	110	2147	1	0	0	0	0	0	0	0
2014	progeny.3-5-1.2	376	2	2587	1			2013	231	39	2132	1	0	0	0	0	0	0	0
2013	progeny260.3	68	3	2586	1			2013	372	180	2132	1	0	0	0	0	0	0	0
2013	progeny342.3	150	3	2586	1			2013	378	186	2131	1	0	0	0	0	0	0	0
2014	progeny.3-4-1.2	371	2	2586	1			2014	par.2-11-2	272	2129	1	0	0	0	0	0	0	0
2014	progeny.2-10-3.4	268	4	2584	1			2013	367	175	2116	1	0	0	0	0	0	0	0
2013	progeny.214.2	22	2	2583	0			2013	349	157	2097	1	0	0	0	0	0	0	0
2014	progeny.3-11-3.1	353	1	2582	1			2013	204	12	2082	1	0	0	0	0	0	0	0
2014	progeny.3-10-1.2	346	2	2580	1			2014	par.2-2-5	305	2082	1	0	0	0	0	0	0	0
2014	progeny.2-10-3.3	268	3	2579	1			2013	343	151	2075	1	0	0	0	0	0	0	0
2013	progeny220.4	28	4	2571	1			2013	379	187	2070	1	0	0	0	0	0	0	0
2014	progeny.2-11-4.2	274	2	2566	0			2013	307	115	2067	1	0	0	0	0	0	0	0
2014	progeny.3-15-2.4	359	4	2563	1			2014	par.2-6-4	324	2066	1	0	0	0	0	0	0	0
2014	progeny.1-7-3.4	248	4	2561	1			2013	220	28	2056	1	0	0	0	0	0	0	0
2014	progeny.3-6-4.1	384	1	2561	1			2013	300	108	2053	1	0	0	0	0	0	0	0
2013	progeny281.4	89	4	2560	1			2013	274	82	2035	1	0	0	0	0	0	0	0
2014	progeny.1-3-2.3	226	3	2560	1			2014	par.1-2-1	220	2011	1	0	0	0	0	0	0	0
2013	progeny.270.3	78	3	2558	1			2014	par.1-10-1	213	1989	1	0	0	0	0	0	0	0
2013	progeny241.3	49	3	2551	1			2013	202	10	1984	1	0	0	0	0	0	0	0
2013	progeny325.4	133	4	2550	0			2013	346	154	1983	1	0	0	0	0	0	0	0
2014	progeny.2-14-3.3	288	3	2544	1			2013	295	103	1980	1	0	0	0	0	0	0	0
2014	progeny.3-5-2.4	377	4	2542	0			2014	par.1-4-2	231	1973	1	0	0	0	0	0	0	0
2014	progeny.2-1-4.3	264	3	2541	1			2014	par.1-3-5	229	1969	1	0	0	0	0	0	0	0
2014	progeny.3-10-4.1	349	1	2535	1			2014	par.2-14-2	287	1959	1	0	0	0	0	0	0	0
2013	progeny367.4	175	4	2533	1			2013	322	130	1944	1	0	0	0	0	0	0	0
2014	progeny.3-15-1.2	358	2	2531	1			2013	271	79	1942	1	0	0	0	0	0	0	0
2013	progeny268.3	76	3	2530	1			2013	355	163	1924	1	0	0	0	0	0	0	0
2013	progeny274.3	82	3	2524	0			2013	365	173	1897	1	0	0	0	0	0	0	0
2014	progeny.2-15-5.2	295	2	2524	0			2013	226	34	1892	1	0	0	0	0	0	0	0
2013	progeny350.3	158	3	2522	1			2014	par.1-2-5	224	1890	1	0	0	0	0	0	0	0
2014	progeny.2-5-4.3	319	3	2521	1			2014	par.2-13-3	283	1880	1	0	0	0	0	0	0	0
2013	progeny359.3	167	3	2516	1			2014	par.3-6-2	382	1873	1	0	0	0	0	0	0	0
2014	progeny.2-1-4.2	264	2	2514	0			2013	335	143	1835	1	0	0	0	0	0	0	0
2014	progeny.2-13-2.2	282	2	2514	1			2014	par.3-4-1	371	1829	0	1	0	0	0	0	0	0
2013	progeny324.2	132	2	2512	1			2013	299	107	1828	1	0	0	0	0	0	0	0
2013	progeny240.1	48	1	2509	1			2013	303	111	1810	1	0	0	0	0	0	0	0
2013	progeny241.4	49	4	2507	1			2014	par.2-3-5	310	1796	1	0	0	0	0	0	0	0
2014	progeny.3-7-5.3	390	3	2507	1			2014	par.3-2-4	364	1791	1	0	0	0	0	0	0	0
2014	progeny.2-16-3.3	298	3	2504	1			2014	par.2-15-5	295	1782	0	1	0	0	0	0	0	0
2013	progeny292.1	100	1	2502	1			2013	380	188	1778	1	0	0	0	0	0	0	0
2014	progeny.2-10-4.1	269	1	2500	1			2013	347	155	1777	1	0	0	0	0	0	0	0
2013	progeny292.3	100	3	2499	0			2014	par.2-10-5	270	1746	1	0	0	0	0	0	0	0
2014	progeny.2-13-3.4	283	4	2496	1			2013	227	35	1743	1	0	0	0	0	0	0	0
2014	progeny.2-6-4.4	324	4	2496	1			2013	325	133	1737	1	0	0	0	0	0	0	0
2013	progeny289.3	97	3	2493	0			2013	247	55	1716	1	0	0	0	0	0	0	0
2013	progeny263.4	71	4	2490	0			2014	par.3-12-1	356	1713	1	0	0	0	0	0	0	0
2014	progeny.3-1-2.1	342	1	2489	1			2013	263	71	1704	1	0	0	0	0	0	0	0
2014	progeny.2-13-3.2	283	2	2484	1			2014	par.1-6-4	244	1703	1	0	0	0	0	0	0	0
2013	progeny282.2	90	2	2482	1			2013	280	88	1700	1	0	0	0	0	0	0	0
2013	progeny235.4	43	4	2480	1			2014	par.3-10-1	346	1668	1	0	0	0	0	0	0	0
2013	progeny335.4	143	4	2479	1			2014	par.2-3-3	308	1666	1	0	0	0	0	0	0	0
2013	progeny.338.1	146	1	2474	0			2013	358	166	1629	1	0	0	0	0	0	0	0
2013	progeny236.3	44	3	2469	1			2014	par.1-6-3	243	1620	1	0	0	0	0	0	0	0
2013	progeny261.1	69	1	2468	1			2014	par.2-5-3	318	1613	1	0	0	0	0	0	0	0
2014	progeny.3-5-2.3	377	3	2466	1			2014	par.2-8-1	331	1609	1	0	0	0	0	0	0	0
2014	progeny.2-10-1.2	266	2	2465	1			2013	205	13	1598	1	0	0	0	0	0	0	0
2014	progeny.1-3-4.4	228	4	2463	0			2014	par.2-14-1	286	1546	1	0	0	0	0	0	0	0
2013	progeny232.4	40	4	2462	1			2013	261	69	1541	0	1	0	0	0	0	0	0
2014	progeny.3-5-3.2	378	2	2460	1			2014	par.1-6-1	241	1528	1	0	0	0	0	0	0	0
2014	progeny.3-7-4.3	389	3	2455	1			2014	par.2-5-4	319	1519	1	0	0	0	0	0	0	0
2013	progeny289.4	97	4	2453	1			2014	par.3-5-1	376	1492	1	0	0	0	0	0	0	0
2014	progeny.3-4-1.4	371	4	2452	1			2013	286	94	1488	1	0	0	0	0	0	0	0
2013	progeny336.2	144	2	2450	1			2013	225	33	1478	1	0	0	0	0	0	0	0
2014	progeny.3-7-3.3	388	3	2449	1			2013	229	37	1477	1	0	0	0	0	0	0	0
2013	progeny333.4	141	4	2446	0			2014	par.2-7-2	327	1473	0	1	0	0	0	0	0	0
2014	progeny.2-1-2.2	262	2	2444	1			2014	par.1-3-4	228	1464	1	0	0	0	0	0	0	0
2014	progeny.3-4-1.3	371	3	2444	1			2013	288	96	1448	1	0	0	0	0	0	0	0
2013	progeny259.3	67	3	2443	1			2013	354	162	1447	1	0	0	0	0	0	0	0
2014	progeny.2-2-4.1	304	1	2438	1			2014	par.1-2-4	223	1443	1	0	0	0	0	0	0	0
2014	progeny.1-4-2.3	231	3	2437	1			2013	340	148	1439	1	0	0	0	0	0	0	0
2014	progeny.1-6-2.3	242	3	2434	1			2013	233	41	1433	1	0	0	0	0	0	0	0
2014	progeny.3-6-4.3	384	3	2434	1			2014	par.1-6-5	245	1433	0.998889	0.00111111	0	0	0	0	0	0
2014	progeny.3-6-2.2	382	2	2432	1			2014	par.1-3-1	225	1430	1	0	0	0	0	0	0	0
2013	progeny383.3	191	3	2431	1			2013	248	56	1428	1	0	0	0	0	0	0	0
2013	progeny246.4	54	4	2427	1			2013	268	76	1425	1	0	0	0	0	0	0	0
2014	progeny.3-10-5.4	350	4	2426	1			2014	par.1-3-2	226	1417	1	0	0	0	0	0	0	0
2013	progeny258.4	66	4	2418	1			2013	279	87	1406	1	0	0	0	0	0	0	0
2013	progeny327.2	135	2	2418	1			2013	383	191	1389	1	0	0	0	0	0	0	0
2014	progeny.3-7-1.1	386	1	2418	1			2014	par.2-12-1	276	1389	1	0	0	0	0	0	0	0
2013	progeny238.3	46	3	2417	1			2014	par.2-1-4	264	1377	1	0	0	0	0	0	0	0
2013	progeny329.3	137	3	2416	0			2014	par.2-5-1	316	1376	1	0	0	0	0	0	0	0
2013	progeny239.1	47	1	2411	1			2014	par.2-3-1	306	1367	1	0	0	0	0	0	0	0
2014	progeny.1-10-5.3	217	3	2411	1			2013	210	18	1364	1	0	0	0	0	0	0	0
2013	progeny274.4	82	4	2408	1			2013	315	123	1355	1	0	0	0	0	0	0	0
2014	progeny.1-2-3.3	222	3	2408	1			2013	236	44	1349	1	0	0	0	0	0	0	0
2013	progeny288.1	96	1	2402	1			2013	207	15	1333	1	0	0	0	0	0	0	0
2014	progeny.1-7-5.4	250	4	2400	1			2014	par.2-7-4	329	1332	0	1	0	0	0	0	0	0
2014	progeny.3-9-1.4	396	4	2396	1			2013	240	48	1330	1	0	0	0	0	0	0	0
2013	progeny235.1	43	1	2394	1			2014	par.2-2-1	301	1317	1	0	0	0	0	0	0	0
2013	progeny231.3	39	3	2391	1			2014	par.1-5-4	238	1305	0	1	0	0	0	0	0	0
2013	progeny277.4	85	4	2390	1			2014	par.1-11-5	219	1303	1	0	0	0	0	0	0	0
2014	progeny.1-9-3.1	258	1	2387	1			2013	319	127	1302	1	0	0	0	0	0	0	0
2013	progeny334.3	142	3	2386	1			2013	253	61	1295	1	0	0	0	0	0	0	0
2013	progeny381.3	189	3	2384	1			2013	309	117	1271	1	0	0	0	0	0	0	0
2014	progeny.3-2-1.3	361	3	2384	1			2014	par.1-5-3	237	1254	1	0	0	0	0	0	0	0
2013	progeny235.2	43	2	2377	1			2014	par.2-2-2	302	1248	1	0	0	0	0	0	0	0
2013	progeny283.4	91	4	2376	1			2014	par.2-7-1	326	1238	1	0	0	0	0	0	0	0
2013	progeny275.2	83	2	2371	1			2014	par.3-3-5	370	1221	0	1	0	0	0	0	0	0
2013	progeny246.3	54	3	2369	1			2013	278	86	1220	0	1	0	0	0	0	0	0
2013	progeny319.2	127	2	2367	0			2013	234	42	1216	1	0	0	0	0	0	0	0
2013	progeny227.4	35	4	2365	1			2013	252	60	1213	1	0	0	0	0	0	0	0
2013	progeny389.4	197	4	2361	1			2013	339	147	1212	1	0	0	0	0	0	0	0
2014	progeny.3-7-4.2	389	2	2360	1			2013	352	160	1212	1	0	0	0	0	0	0	0
2014	progeny.1-4-3.3	232	3	2357	1			2014	par.2-16-4	299	1205	1	0	0	0	0	0	0	0
2013	progeny335.2	143	2	2354	1			2014	par.3-2-2	362	1197	1	0	0	0	0	0	0	0
2013	progeny313.3	121	3	2353	1			2014	par.2-1-1	261	1179	1	0	0	0	0	0	0	0
2013	progeny391.4	199	4	2353	1			2014	par.3-5-5	380	1178	0.998611	0.00138889	0	0	0	0	0	0
2014	progeny.2-4-5.3	315	3	2351	1			2014	par.3-1-3	343	1177	1	0	0	0	0	0	0	0
2013	progeny269.3	77	3	2350	1			2013	237	45	1175	1	0	0	0	0	0	0	0
2014	progeny.2-7-2.1	327	1	2347	1			2014	par.2-11-5	275	1161	1	0	0	0	0	0	0	0
2014	progeny.2-6-5.2	325	2	2340	1			2013	363	171	1147	1	0	0	0	0	0	0	0
2013	progeny303.4	111	4	2339	1			2013	211	19	1137	1	0	0	0	0	0	0	0
2014	progeny.2-5-4.2	319	2	2333	1			2014	par.2-7-3	328	1117	0.994722	0.00527778	0	0	0	0	0	0
2014	progeny.3-2-2.1	362	1	2333	1			2013	213	21	1109	1	0	0	0	0	0	0	0
2013	progeny324.4	132	4	2332	1			2013	251	59	1107	1	0	0	0	0	0	0	0
2013	progeny266.4	74	4	2330	1			2014	par.2-2-4	304	1098	1	0	0	0	0	0	0	0
2013	progeny351.1	159	1	2330	1			2013	215	23	1097	1	0	0	0	0	0	0	0
2013	progeny323.1	131	1	2324	1			2014	par.3-1-5	345	1089	0.999722	0.000277778	0	0	0	0	0	0
2014	progeny.2-8-4.4	334	4	2322	1			2014	par.2-16-3	298	1086	0.000277778	0.999722	0	0	0	0	0	0
2013	progeny234.2	42	2	2321	1			2014	par.3-11-5	355	1068	0.999722	0.000277778	0	0	0	0	0	0
2013	progeny229.3	37	3	2318	1			2013	333	141	1056	1	0	0	0	0	0	0	0
2013	progeny348.3	156	3	2318	1			2014	par.2-13-2	282	1041	0	1	0	0	0	0	0	0
2014	progeny.3-11-2.1	352	1	2318	1			2014	par.3-1-4	344	1022	1	0	0	0	0	0	0	0
2014	progeny.2-10-2.3	267	3	2316	1			2014	par.2-2-3	303	1015	0.970278	0.0297222	0	0	0	0	0	0
2013	progeny388.3	196	3	2315	1			2014	par.1-9-2	257	1001	0	0.996667	0.00333333	0	0	0	0	0
2014	progeny.1-9-1.2	256	2	2315	1			2014	par.2-14-3	288	999	1	0	0	0	0	0	0	0
2014	progeny.2-12-4.3	279	3	2315	1			2014	par.3-11-1	351	995	1	0	0	0	0	0	0	0
2013	progeny268.4	76	4	2314	1			2014	par.2-4-2	312	990	1	0	0	0	0	0	0	0
2013	progeny388.4	196	4	2313	1			2014	par.2-15-3	293	965	1	0	0	0	0	0	0	0
2013	progeny387.2	195	2	2312	1			2013	201	9	961	1	0	0	0	0	0	0	0
2014	progeny.1-8-3.2	253	2	2310	1			2013	256	64	951	1	0	0	0	0	0	0	0
2013	progeny321.1	129	1	2307	1			2014	par.3-3-4	369	941	0	1	0	0	0	0	0	0
2014	progeny.2-13-1.3	281	3	2302	1			2014	par.1-8-3	253	935	1	0	0	0	0	0	0	0
2013	progeny349.3	157	3	2298	1			2013	265	73	928	1	0	0	0	0	0	0	0
2014	progeny.2-2-4.4	304	4	2298	1			2014	par.2-9-1	336	928	1	0	0	0	0	0	0	0
2013	progeny381.4	189	4	2297	1			2014	par.3-2-5	365	928	1	0	0	0	0	0	0	0
2014	progeny.1-2-3.1	222	1	2297	1			2014	par.3-1-1	341	922	1	0	0	0	0	0	0	0
2013	progeny286.3	94	3	2296	1			2014	par.2-10-4	269	921	0	1	0	0	0	0	0	0
2013	progeny392.3	200	3	2287	1			2014	par.2-9-2	337	920	1	0	0	0	0	0	0	0
2014	progeny.1-7-3.2	248	2	2287	1			2014	par.3-6-1	381	919	1	0	0	0	0	0	0	0
2014	progeny.2-11-1.1	271	1	2285	1			2013	196	4	914	1	0	0	0	0	0	0	0
2014	progeny.2-10-4.2	269	2	2280	1			2013	272	80	899	1	0	0	0	0	0	0	0
2013	progeny233.4	41	4	2278	1			2014	par.3-7-2	387	878	0.510833	0.489167	0	0	0	0	0	0
2014	progeny.3-2-4.3	364	3	2278	1			2014	par.2-6-3	323	877	0	1	0	0	0	0	0	0
2014	progeny.2-14-1.4	286	4	2273	1			2013	273	81	849	1	0	0	0	0	0	0	0
2014	progeny.1-8-5.2	255	2	2271	1			2014	par.2-13-1	281	846	1	0	0	0	0	0	0	0
2014	progeny.2-12-1.3	276	3	2271	1			2014	par.1-1-5	212	843	0	1	0	0	0	0	0	0
2013	progeny220.2	28	2	2270	1			2013	382	190	831	1	0	0	0	0	0	0	0
2014	progeny.2-4-5.7	315	7	2264	1			2014	par.3-12-2	357	812	1	0	0	0	0	0	0	0
2013	progeny389.3	197	3	2260	1			2014	par.1-10-3	215	803	1	0	0	0	0	0	0	0
2014	progeny.3-7-3.1	388	1	2257	1			2014	par.1-1-2	209	796	1	0	0	0	0	0	0	0
2013	progeny247.4	55	4	2255	1			2014	par.2-9-5	340	786	1	0	0	0	0	0	0	0
2014	progeny.3-10-4.2	349	2	2255	1			2014	par.2-11-1	271	784	1	0	0	0	0	0	0	0
2014	progeny.1-7-4.3	249	3	2250	1			2014	par.2-9-4	339	782	1	0	0	0	0	0	0	0
2014	progeny.1-4-4.4	233	4	2249	1			2013	332	140	773	1	0	0	0	0	0	0	0
2014	progeny.3-8-3.2	393	2	2249	1			2014	par.2-11-3	273	766	0.173056	0.826944	0	0	0	0	0	0
2013	progeny339.2	147	2	2248	1			2014	par.3-6-5	385	757	0	0.488889	0.511111	0	0	0	0	0
2013	progeny298.2	106	2	2247	1			2014	par.2-11-4	274	756	1	0	0	0	0	0	0	0
2013	progeny372.1	180	1	2245	1			2013	217	25	747	1	0	0	0	0	0	0	0
2014	progeny.2-9-5.1	340	1	2243	1			2013	277	85	726	0.945	0.055	0	0	0	0	0	0
2013	progeny304.2	112	2	2235	1			2014	par.2-7-5	330	720	0	0.879167	0.120833	0	0	0	0	0
2013	progeny290.1	98	1	2230	1			2013	264	72	714	1	0	0	0	0	0	0	0
2014	progeny.3-11-1.2	351	2	2229	0			2013	214	22	703	1	0	0	0	0	0	0	0
2013	progeny372.2	180	2	2229	1			2014	par.3-15-1	358	702	1	0	0	0	0	0	0	0
2014	progeny.2-5-1.4	316	4	2228	1			2013	239	47	695	1	0	0	0	0	0	0	0
2014	progeny.2-9-1.4	336	4	2225	1			2014	par.1-1-3	210	692	0.973611	0.0263889	0	0	0	0	0	0
2013	progeny275.4	83	4	2223	1			2014	par.2-12-3	278	689	1	0	0	0	0	0	0	0
2014	progeny.3-3-2.1	367	1	2223	1			2014	par.2-15-4	294	681	0.0163889	0.983611	0	0	0	0	0	0
2013	progeny288.2	96	2	2217	1			2014	par.2-1-3	263	680	0.922778	0.0772222	0	0	0	0	0	0
2013	progeny327.4	135	4	2217	1			2013	216	24	661	1	0	0	0	0	0	0	0
2013	progeny282.3	90	3	2212	0			2014	par.1-5-5	239	641	0.0463889	0.953333	0.000277778	0	0	0	0	0
2013	progeny375.2	183	2	2207	1			2013	384	192	616	1	0	0	0	0	0	0	0
2014	progeny.2-6-5.3	325	3	2204	1			2014	par.1-8-1	251	609	0.999722	0.000277778	0	0	0	0	0	0
2013	progeny335.3	143	3	2196	1			2013	316	124	605	1	0	0	0	0	0	0	0
2014	progeny.3-2-1.2	361	2	2194	1			2014	par.3-7-3	388	597	0.00138889	0.998611	0	0	0	0	0	0
2013	progeny339.3	147	3	2192	1			2013	218	26	589	1	0	0	0	0	0	0	0
2013	progeny399.4	207	4	2185	0			2014	par.1-9-4	259	580	0.0472222	0.946667	0.00611111	0	0	0	0	0
2014	progeny.2-11-4.1	274	1	2181	0			2013	275	83	577	0	1	0	0	0	0	0	0
2014	progeny.2-2-4.3	304	3	2181	1			2014	par.3-4-2	372	573	1	0	0	0	0	0	0	0
2013	progeny287.4	95	4	2172	1			2014	par.3-4-4	374	554	1	0	0	0	0	0	0	0
2013	progeny226.4	34	4	2171	1			2014	par.2-4-5	315	552	1	0	0	0	0	0	0	0
2014	progeny.2-3-3.3	308	3	2171	1			2013	269	77	550	1	0	0	0	0	0	0	0
2014	progeny.2-10-3.1	268	1	2170	1			2014	par.1-7-2	247	531	0	0.0819444	0.896667	0.0213889	0	0	0	0
2013	progeny387.3	195	3	2164	0			2014	par.3-10-3	348	518	0	1	0	0	0	0	0	0
2013	progeny262.2	70	2	2162	1			2013	258	66	513	1	0	0	0	0	0	0	0
2013	progeny260.4	68	4	2159	1			2013	224	32	501	0.636389	0.361667	0.00194444	0	0	0	0	0
2014	progeny.3-8-2.2	392	2	2159	1			2014	par.3-15-2	359	497	1	0	0	0	0	0	0	0
2014	progeny.1-6-2.1	242	1	2158	1			2013	194	2	495	0.663611	0.335	0.00138889	0	0	0	0	0
2014	progeny.3-1-4.1	344	1	2155	1			2014	par.1-10-4	216	488	1	0	0	0	0	0	0	0
2014	progeny.1-4-5.1	234	1	2152	1			2014	par.1-1-1	208	478	0.00638889	0.985278	0.00833333	0	0	0	0	0
2014	progeny.2-5-2.2	317	2	2152	1			2014	par.2-15-1	291	464	1	0	0	0	0	0	0	0
2014	progeny.3-9-2.1	397	1	2152	1			2014	par.2-10-3	268	437	1	0	0	0	0	0	0	0
2013	progeny288.4	96	4	2151	1			2014	par.3-5-4	379	432	0.998889	0.00111111	0	0	0	0	0	0
2013	progeny355.2	163	2	2149	1			2014	par.3-11-2	352	373	0.925833	0.0741667	0	0	0	0	0	0
2013	progeny250.2	58	2	2148	1			2013	219	27	362	0.993889	0.00611111	0	0	0	0	0	0
2014	progeny.3-1-4.3	344	3	2148	1			2014	par.3-9-4	399	335	1	0	0	0	0	0	0	0
2014	progeny.3-5-2.1	377	1	2146	1			2014	par.3-2-3	363	327	1	0	0	0	0	0	0	0
2013	progeny237.3	45	3	2144	1			2014	par.1-9-1	256	321	1	0	0	0	0	0	0	0
2014	progeny.1-4-3.1	232	1	2137	1			2013	193	1	317	0.958611	0.0405556	0.000833333	0	0	0	0	0
2014	progeny.1-11-4.1	218	1	2134	1			2014	par.1-2-3	222	317	0.868333	0.131667	0	0	0	0	0	0
2013	progeny238.1	46	1	2132	1			2013	342	150	307	1	0	0	0	0	0	0	0
2013	progeny392.4	200	4	2129	0			2013	369	177	304	0.983889	0.0161111	0	0	0	0	0	0
2013	progeny391.3	199	3	2126	1			2014	par.3-8-5	395	293	0	1	0	0	0	0	0	0
2013	progeny333.3	141	3	2124	1			2013	368	176	287	0.998056	0.00194444	0	0	0	0	0	0
2014	progeny.1-3-4.1	228	1	2123	0			2014	par.2-12-4	279	274	0.120278	0.879722	0	0	0	0	0	0
2013	progeny231.4	39	4	2123	1			2014	par.2-6-2	322	266	0.577222	0.4075	0.0138889	0.00138889	0	0	0	0
2013	progeny263.2	71	2	2116	1			2014	par.2-12-2	277	257	0.981667	0.0183333	0	0	0	0	0	0
2014	progeny.3-10-3.3	348	3	2105	1			2014	par.2-1-5	265	218	0.0733333	0.430833	0.346667	0.118333	0.0269444	0.00388889	0	0
2014	progeny.1-4-2.2	231	2	2099	1			2014	par.3-6-3	383	204	1	0	0	0	0	0	0	0
2014	progeny.3-8-1.2	391	2	2099	1			2014	par.2-8-3	333	202	0	1	0	0	0	0	0	0
2013	progeny398.3	206	3	2097	1			2013	203	11	198	0.543889	0.311944	0.125	0.0119444	0.00666667	0	0.000555556	0
2013	progeny377.3	185	3	2095	1			2014	par.3-3-3	368	187	0.289444	0.694167	0.0152778	0.00111111	0	0	0	0
2014	progeny.3-7-5.4	390	4	2094	1			2014	par.1-5-2	236	172	1	0	0	0	0	0	0	0
2014	progeny.3-6-2.1	382	1	2092	1			2014	par.2-16-1	296	172	0.591389	0.3925	0.0161111	0	0	0	0	0
2014	progeny.1-5-1.2	235	2	2085	0			2014	par.1-9-3	258	171	0.111389	0.888056	0.000555556	0	0	0	0	0
2014	progeny.2-5-1.3	316	3	2084	1			2014	par.3-11-3	353	164	1	0	0	0	0	0	0	0
2013	progeny288.3	96	3	2078	1			2014	par.1-7-1	246	162	1	0	0	0	0	0	0	0
2014	progeny.3-6-3.3	383	3	2078	1			2014	par.2-12-5	280	162	1	0	0	0	0	0	0	0
2014	progeny.2-8-3.2	333	2	2077	1			2014	par.3-3-2	367	155	1	0	0	0	0	0	0	0
2014	progeny.3-11-3.3	353	3	2074	1			2014	par.2-16-2	297	148	0	0.991111	0.00888889	0	0	0	0	0
2013	progeny364.4	172	4	2071	1			2014	par.3-8-2	392	148	0	1	0	0	0	0	0	0
2013	progeny267.4	75	4	2069	1			2014	par.3-5-3	378	143	0.998889	0.00111111	0	0	0	0	0	0
2014	progeny.2-16-3.1	298	1	2069	1			2014	par.1-4-4	233	118	0.0997222	0.900278	0	0	0	0	0	0
2013	progeny379.3	187	3	2066	1			2014	par.3-4-3	373	115	0.523056	0.351944	0.103056	0.0219444	0	0	0	0
2013	progeny302.2	110	2	2060	1			2014	par.2-15-2	292	110	0.774722	0.0105556	0.196389	0.0183333	0	0	0	0
2014	progeny.2-4-1.1	311	1	2060	1			2014	par.3-10-4	349	110	1	0	0	0	0	0	0	0
2013	progeny271.2	79	2	2056	1			2014	par.2-10-1	266	109	1	0	0	0	0	0	0	0
2013	progeny251.3	59	3	2050	0			2014	par.3-8-1	391	102	1	0	0	0	0	0	0	0
2013	progeny223.3	31	3	2050	1			2014	par.3-9-5	400	100	0.963333	0.035	0.00138889	0.000277778	0	0	0	0
2013	progeny397.2	205	2	2045	1			2014	par.3-9-3	398	92	0.673889	0.312778	0.0116667	0	0.00166667	0	0	0
2013	progeny232.3	40	3	2044	1			2014	par.2-5-2	317	91	0	0.104444	0.843889	0.0516667	0	0	0	0
2014	progeny.3-2-2.2	362	2	2044	1			2014	par.2-8-4	334	91	1	0	0	0	0	0	0	0
2013	progeny234.4	42	4	2043	1			2014	par.1-5-1	235	89	1	0	0	0	0	0	0	0
2013	progeny267.3	75	3	2040	1			2014	par.3-15-3	360	77	1	0	0	0	0	0	0	0
2014	progeny.3-10-4.4	349	4	2039	1			2014	par.3-2-1	361	73	0	0	0.963611	0.0363889	0	0	0	0
2013	progeny397.3	205	3	2030	1			2014	par.2-14-4	289	69	0.661944	0.306111	0.0291667	0.0025	0.000277778	0	0	0
2014	progeny.3-2-3.3	363	3	2028	1			2014	par.3-10-2	347	66	0	1	0	0	0	0	0	0
2013	progeny346.4	154	4	2020	0			2014	par.2-1-2	262	65	1	0	0	0	0	0	0	0
2013	progeny388.1	196	1	2019	1			2014	par.1-7-5	250	63	1	0	0	0	0	0	0	0
2014	progeny.1-5-1.1	235	1	2017	0			2014	par.3-11-4	354	61	0.9975	0.0025	0	0	0	0	0	0
2013	progeny227.3	35	3	2014	1			2014	par.3-9-2	397	57	1	0	0	0	0	0	0	0
2013	progeny.338.4	146	4	2013	1			2014	par.3-6-4	384	52	0	1	0	0	0	0	0	0
2014	progeny.3-10-5.3	350	3	2009	1			2014	par.3-9-1	396	47	1	0	0	0	0	0	0	0
2013	progeny237.2	45	2	2007	1			2014	par.3-8-4	394	41	0.723056	0.214444	0.0511111	0.0075	0.00194444	0.00194444	0	0
2013	progeny334.1	142	1	2006	1			2014	par.1-8-2	252	30	1	0	0	0	0	0	0	0
2013	progeny362.4	170	4	2005	1			2013	311	119	29	0.836389	0.138333	0.02	0.00472222	0.000555556	0	0	0
2013	progeny385.3	193	3	2004	0			2014	par.2-10-2	267	17	0	0.887778	0.112222	0	0	0	0	0
2013	progeny282.4	90	4	2000	0			2014	par.2-3-2	307	14	0	0.893333	0.106667	0	0	0	0	0
2013	progeny379.4	187	4	2000	1			2014	par.3-4-5	375	14	0.802222	0.161111	0.0305556	0.005	0.000833333	0.000277778	0	0
2014	progeny.3-10-2.3	347	3	1998	1			2014	par.1-11-4	218	12	1	0	0	0	0	0	0	0
2013	progeny257.2	65	2	1996	1			2014	par.3-10-5	350	12	1	0	0	0	0	0	0	0
2014	progeny.3-5-1.3	376	3	1991	1			2014	par.3-7-1	386	9	1	0	0	0	0	0	0	0
2013	progeny352.4	160	4	1990	0			2014	par.1-10-2	214	8	1	0	0	0	0	0	0	0
2014	progeny.2-2-1.2	301	2	1989	1			2014	par.3-7-4	389	7	1	0	0	0	0	0	0	0
2014	progeny.3-15-2.2	359	2	1989	1			2014	par.2-8-2	332	6	0.836667	0.134444	0.025	0.00333333	0.000555556	0	0	0
2014	progeny.2-8-3.3	333	3	1986	1			2014	par.2-4-3	313	5	0.991389	0.00861111	0	0	0	0	0	0
2014	progeny.3-3-2.3	367	3	1984	1			2014	par.1-4-3	232	2	1	0	0	0	0	0	0	0
2013	progeny250.1	58	1	1982	1			2014	par.1-8-4	254	2	0.810833	0.148056	0.0347222	0.00555556	0.000277778	0.000555556	0	0
2014	progeny.2-5-2.3	317	3	1981	1			2014	unseen1989	193	0	1	0	0	0	0	0	0	0
2013	progeny398.1	206	1	1979	1			2014	unseen1986	194	0	1	0	0	0	0	0	0	0
2013	progeny269.2	77	2	1977	1			2014	unseen1984	195	0	1	0	0	0	0	0	0	0
2014	progeny.2-7-1.2	326	2	1972	0			2014	unseen1982	196	0	0.999167	0.000833333	0	0	0	0	0	0
2013	progeny280.2	88	2	1969	1			2014	unseen1981	197	0	1	0	0	0	0	0	0	0
2014	progeny.1-2-3.4	222	4	1965	1			2014	unseen1979	198	0	0.954167	0.0458333	0	0	0	0	0	0
2013	progeny387.4	195	4	1964	1			2014	unseen1977	199	0	1	0	0	0	0	0	0	0
2014	progeny.2-12-2.1	277	1	1963	1			2014	unseen1972	200	0	1	0	0	0	0	0	0	0
2014	progeny.1-9-1.6	256	6	1960	1			2014	unseen1969	201	0	0.374167	0.625833	0	0	0	0	0	0
2013	progeny293.2	101	2	1959	1			2014	unseen1965	202	0	1	0	0	0	0	0	0	0
2013	progeny358.4	166	4	1957	1			2014	unseen1964	203	0	0.933889	0.0661111	0	0	0	0	0	0
2013	progeny322.1	130	1	1955	1			2014	unseen1963	204	0	0.834167	0.139167	0.0216667	0.00416667	0.000833333	0	0	0
2014	progeny.2-13-4.2	284	2	1952	1			2014	unseen1960	205	0	0.999722	0.000277778	0	0	0	0	0	0
2014	progeny.2-1-1.2	261	2	1951	1			2014	unseen1959	206	0	1	0	0	0	0	0	0	0
2014	progeny.2-8-3.4	333	4	1949	1			2014	unseen1957	207	0	1	0	0	0	0	0	0	0
2013	progeny398.4	206	4	1948	1			2014	par.1-5-6	240	0	0.0872222	0.735556	0.161944	0.0127778	0.0025	0	0	0
2013	progeny386.2	194	2	1947	1			2014	par.1-7-3	248	0	0.999444	0.000555556	0	0	0	0	0	0
2014	progeny.1-10-4.4	216	4	1943	1			2014	par.1-7-4	249	0	0.999444	0.000555556	0	0	0	0	0	0
2014	progeny.3-10-2.2	347	2	1942	1
2013	progeny232.2	40	2	1939	1
2013	progeny241.2	49	2	1935	1
2013	progeny238.2	46	2	1934	1
2014	progeny.1-1-4.1	211	1	1934	1
2014	progeny.1-7-1.1	246	1	1931	1
2013	progeny305.1	113	1	1925	1
2014	progeny.1-5-2.2	236	2	1923	0
2014	progeny.2-6-3.3	323	3	1921	1
2014	progeny.3-5-5.1	380	1	1913	1
2014	progeny.1-8-2.1	252	1	1906	0
2013	progeny298.4	106	4	1905	1
2013	progeny233.1	41	1	1903	1
2013	progeny275.3	83	3	1895	1
2014	progeny.1-10-3.1	215	1	1895	1
2013	progeny267.2	75	2	1888	1
2013	progeny373.3	181	3	1886	1
2014	progeny.2-5-4.1	319	1	1884	1
2014	progeny.2-12-5.2	280	2	1878	0
2013	progeny352.3	160	3	1877	0
2014	progeny.1-7-5.2	250	2	1877	0
2014	progeny.3-4-1.1	371	1	1871	1
2014	progeny.2-13-4.1	284	1	1868	1
2013	progeny250.3	58	3	1867	0
2013	progeny386.1	194	1	1867	1
2014	progeny.3-15-1.4	358	4	1867	1
2013	progeny379.2	187	2	1865	1
2014	progeny.3-5-5.3	380	3	1863	1
2013	progeny262.1	70	1	1860	1
2013	progeny262.4	70	4	1858	1
2013	progeny264.2	72	2	1857	1
2013	progeny300.2	108	2	1854	1
2013	progeny366.3	174	3	1853	1
2014	progeny.3-15-2.1	359	1	1853	1
2014	progeny.3-5-1.4	376	4	1850	1
2013	progeny385.2	193	2	1845	1
2014	progeny.1-4-3.2	232	2	1845	1
2014	progeny.2-5-2.1	317	1	1843	1
2014	progeny.3-3-5.3	370	3	1843	1
2013	progeny257.3	65	3	1839	1
2013	progeny286.4	94	4	1838	1
2014	progeny.2-10-4.3	269	3	1837	1
2013	progeny234.3	42	3	1832	1
2014	progeny.2-14-2.4	287	4	1830	1
2013	progeny237.4	45	4	1822	1
2014	progeny.2-4-3.3	313	3	1820	1
2013	progeny240.2	48	2	1816	1
2014	progeny.1-1-4.4	211	4	1809	1
2013	progeny266.1	74	1	1805	1
2013	progeny387.1	195	1	1798	1
2014	progeny.2-12-2.3	277	3	1797	1
2014	progeny.2-5-5.2	320	2	1796	1
2014	progeny.3-12-2.1	357	1	1796	1
2013	progeny211.1	19	1	1787	1
2013	progeny314.3	122	3	1787	1
2013	progeny269.4	77	4	1785	1
2014	progeny.2-12-2.2	277	2	1780	1
2014	progeny.2-10-5.4	270	4	1778	1
2013	progeny263.3	71	3	1773	1
2014	progeny.2-3-2.2	307	2	1772	1
2013	progeny358.2	166	2	1765	1
2014	progeny.2-1-4.4	264	4	1764	0
2014	progeny.2-13-4.3	284	3	1759	0
2014	progeny.3-9-2.3	397	3	1758	1
2013	progeny233.3	41	3	1757	1
2013	progeny236.1	44	1	1756	1
2013	progeny298.3	106	3	1748	1
2013	progeny377.1	185	1	1748	1
2014	progeny.3-10-4.3	349	3	1747	1
2014	progeny.1-11-5.3	219	3	1745	1
2014	progeny.2-13-2.3	282	3	1743	1
2014	progeny.2-12-4.2	279	2	1739	1
2013	progeny262.3	70	3	1735	1
2014	progeny.2-1-4.1	264	1	1735	1
2013	progeny373.4	181	4	1733	1
2014	progeny.2-9-1.1	336	1	1733	1
2014	progeny.1-7-3.3	248	3	1732	1
2014	progeny.2-5-4.4	319	4	1732	1
2013	progeny280.3	88	3	1721	1
2014	progeny.2-5-5.3	320	3	1716	1
2014	progeny.3-3-2.4	367	4	1716	1
2013	progeny258.1	66	1	1715	1
2013	progeny392.1	200	1	1715	1
2014	progeny.2-11-1.2	271	2	1714	1
2014	progeny.2-5-1.2	316	2	1713	1
2013	progeny353.3	161	3	1711	1
2013	progeny213.1	21	1	1709	1
2014	progeny.2-12-3.3	278	3	1708	1
2014	progeny.3-8-1.3	391	3	1707	1
2013	progeny.214.3	22	3	1704	0
2014	progeny.3-9-3.3	398	3	1701	1
2014	progeny.1-2-2.2	221	2	1698	1
2013	progeny352.1	160	1	1697	0
2014	progeny.3-3-2.2	367	2	1695	0
2013	progeny290.4	98	4	1690	1
2013	progeny259.2	67	2	1685	1
2014	progeny.1-3-3.1	227	1	1684	1
2013	progeny393.4	201	4	1677	1
2014	progeny.2-9-2.1	337	1	1676	1
2013	progeny231.2	39	2	1674	1
2013	progeny271.3	79	3	1673	1
2013	progeny393.2	201	2	1673	1
2014	progeny.1-7-4.1	249	1	1670	1
2013	progeny372.3	180	3	1666	1
2014	progeny.1-6-4.2	244	2	1664	1
2013	progeny261.3	69	3	1658	1
2013	progeny386.3	194	3	1658	1
2014	progeny.2-16-2.2	297	2	1657	1
2014	progeny.1-6-4.3	244	3	1655	1
2014	progeny.2-8-4.2	334	2	1653	0
2014	progeny.2-4-5.8	315	8	1649	1
2014	progeny.3-2-4.1	364	1	1649	1
2014	progeny.2-13-3.3	283	3	1646	1
2013	progeny397.1	205	1	1642	1
2013	progeny308.3	116	3	1641	1
2014	progeny.3-11-4.1	354	1	1640	1
2014	progeny.1-5-1.4	235	4	1636	0
2014	progeny.1-1-4.2	211	2	1636	1
2014	progeny.3-6-4.2	384	2	1634	1
2013	progeny382.4	190	4	1632	1
2014	progeny.2-12-5.4	280	4	1630	1
2014	progeny.1-7-4.2	249	2	1628	1
2014	progeny.1-7-1.3	246	3	1625	1
2014	progeny.2-2-1.4	301	4	1623	0
2013	progeny223.4	31	4	1612	1
2014	progeny.1-7-5.1	250	1	1610	1
2014	progeny.1-5-2.3	236	3	1603	1
2013	progeny357.3	165	3	1598	0
2013	progeny227.2	35	2	1597	1
2013	progeny247.3	55	3	1596	1
2014	progeny.3-3-1.3	366	3	1593	1
2013	progeny348.2	156	2	1592	1
2014	progeny.3-10-3.1	348	1	1591	1
2013	progeny388.2	196	2	1588	1
2014	progeny.1-1-5.2	212	2	1580	1
2013	progeny228.2	36	2	1579	1
2013	progeny366.2	174	2	1577	1
2014	progeny.2-4-5.2	315	2	1577	1
2014	progeny.2-8-1.2	331	2	1577	1
2013	progeny241.1	49	1	1575	1
2013	progeny234.1	42	1	1574	1
2013	progeny264.4	72	4	1570	1
2014	progeny.2-11-3.1	273	1	1569	1
2013	progeny226.1	34	1	1566	1
2013	progeny280.4	88	4	1562	0
2013	progeny226.3	34	3	1560	0
2014	progeny.2-10-5.3	270	3	1560	1
2014	progeny.1-1-5.3	212	3	1559	1
2014	progeny.1-2-2.1	221	1	1558	0
2014	progeny.2-11-3.4	273	4	1557	1
2013	progeny285.2	93	2	1555	1
2013	progeny283.2	91	2	1551	1
2013	progeny213.4	21	4	1550	1
2014	progeny.2-5-5.4	320	4	1543	1
2013	progeny213.3	21	3	1538	1
2013	progeny283.3	91	3	1538	1
2013	progeny394.3	202	3	1537	0
2013	progeny363.4	171	4	1537	1
2014	progeny.3-6-3.1	383	1	1532	1
2013	progeny314.1	122	1	1531	0
2013	progeny336.3	144	3	1531	1
2013	progeny279.2	87	2	1521	1
2014	progeny.1-2-1.3	220	3	1520	0
2014	progeny.3-9-2.4	397	4	1520	1
2014	progeny.3-10-5.2	350	2	1518	1
2014	progeny.2-2-2.2	302	2	1516	1
2013	progeny237.1	45	1	1515	1
2014	progeny.3-12-1.3	356	3	1512	1
2014	progeny.2-13-1.2	281	2	1508	1
2013	progeny326.3	134	3	1505	1
2013	progeny395.1	203	1	1501	1
2014	progeny.2-4-1.2	311	2	1496	1
2014	progeny.1-9-3.3	258	3	1494	1
2013	progeny278.3	86	3	1487	0
2014	progeny.2-1-2.3	262	3	1485	0
2014	progeny.2-9-4.4	339	4	1484	1
2014	progeny.2-12-3.2	278	2	1481	0
2014	progeny.3-1-1.2	341	2	1479	1
2013	progeny236.2	44	2	1473	1
2013	progeny383.2	191	2	1472	1
2014	progeny.2-9-1.3	336	3	1464	1
2014	progeny.2-13-4.4	284	4	1461	1
2013	progeny399.3	207	3	1458	0
2013	progeny229.2	37	2	1452	1
2014	progeny.3-5-4.4	379	4	1446	1
2014	progeny.2-8-5.2	335	2	1444	1
2013	progeny289.2	97	2	1443	1
2014	progeny.2-4-5.6	315	6	1441	1
2014	progeny.2-10-5.1	270	1	1437	1
2014	progeny.2-8-5.1	335	1	1433	1
2014	progeny.1-3-4.3	228	3	1430	0
2014	progeny.2-1-2.1	262	1	1430	1
2014	progeny.2-15-3.2	293	2	1429	1
2013	progeny327.1	135	1	1427	1
2014	progeny.1-2-2.3	221	3	1423	1
2013	progeny367.2	175	2	1422	1
2014	progeny.3-7-5.1	390	1	1422	1
2013	progeny313.1	121	1	1421	1
2013	progeny396.1	204	1	1419	1
2013	progeny247.1	55	1	1417	0
2013	progeny325.1	133	1	1411	1
2013	progeny227.1	35	1	1409	1
2014	progeny.3-6-2.3	382	3	1409	1
2014	progeny.3-10-5.1	350	1	1404	1
2013	progeny229.1	37	1	1399	1
2014	progeny.1-8-5.1	255	1	1396	1
2013	progeny235.3	43	3	1395	1
2014	progeny.2-12-1.2	276	2	1395	1
2013	progeny208.1	16	1	1386	1
2014	progeny.1-7-1.4	246	4	1386	1
2013	progeny392.2	200	2	1385	1
2013	progeny248.3	56	3	1384	1
2014	progeny.2-11-4.4	274	4	1380	0
2013	progeny297.3	105	3	1380	1
2014	progeny.1-10-5.2	217	2	1379	1
2013	progeny394.2	202	2	1369	1
2013	progeny249.2	57	2	1365	1
2014	progeny.2-7-2.2	327	2	1365	1
2013	progeny306.4	114	4	1356	1
2013	progeny274.1	82	1	1355	1
2014	progeny.1-2-1.2	220	2	1344	0
2013	progeny342.1	150	1	1340	1
2013	progeny320.3	128	3	1337	1
2014	progeny.3-1-1.1	341	1	1334	1
2014	progeny.2-6-1.2	321	2	1332	1
2014	progeny.3-5-1.1	376	1	1331	1
2014	progeny.2-11-2.3	272	3	1329	1
2014	progeny.1-7-3.1	248	1	1327	1
2013	progeny303.1	111	1	1326	1
2013	progeny358.1	166	1	1322	1
2014	progeny.2-15-2.3	292	3	1318	0.225556
2014	progeny.2-11-1.4	271	4	1317	1
2014	progeny.2-12-4.1	279	1	1317	1
2013	progeny250.4	58	4	1316	1
2013	progeny246.2	54	2	1315	1
2014	progeny.1-6-3.2	243	2	1310	1
2014	progeny.2-7-4.4	329	4	1310	1
2013	progeny366.1	174	1	1304	1
2014	progeny.1-8-3.4	253	4	1303	1
2014	progeny.3-1-1.4	341	4	1302	1
2013	progeny260.1	68	1	1295	1
2013	progeny306.2	114	2	1289	1
2014	progeny.3-9-2.2	397	2	1289	1
2013	progeny232.1	40	1	1287	1
2013	progeny281.2	89	2	1287	1
2014	progeny.2-16-2.4	297	4	1287	1
2013	progeny332.1	140	1	1284	1
2013	progeny349.4	157	4	1282	1
2014	progeny.1-4-4.1	233	1	1279	1
2013	progeny314.2	122	2	1272	1
2013	progeny302.3	110	3	1271	1
2014	progeny.1-1-5.1	212	1	1270	1
2013	progeny391.2	199	2	1269	1
2014	progeny.2-12-5.1	280	1	1266	0
2013	progeny365.4	173	4	1266	1
2013	progeny228.1	36	1	1265	1
2013	progeny279.3	87	3	1264	1
2014	progeny.3-15-3.4	360	4	1263	1
2013	progeny220.3	28	3	1253	0
2013	progeny261.2	69	2	1245	1
2013	progeny272.4	80	4	1242	1
2014	progeny.2-2-4.2	304	2	1227	1
2013	progeny248.1	56	1	1226	1
2013	progeny360.1	168	1	1223	1
2013	progeny334.2	142	2	1214	0
2014	progeny.1-10-2.1	214	1	1208	1
2013	progeny381.2	189	2	1205	1
2014	progeny.3-1-1.3	341	3	1205	1
2013	progeny349.2	157	2	1200	1
2014	progeny.2-16-2.3	297	3	1189	1
2014	progeny.1-5-1.3	235	3	1186	0
2013	progeny326.2	134	2	1177	1
2013	progeny301.4	109	4	1174	0
2014	progeny.1-1-4.3	211	3	1172	1
2013	progeny375.1	183	1	1170	0
2013	progeny280.1	88	1	1167	1
2013	progeny358.3	166	3	1167	1
2013	progeny346.3	154	3	1163	1
2013	progeny393.3	201	3	1162	1
2014	progeny.2-14-4.1	289	1	1158	1
2013	progeny304.4	112	4	1155	1
2013	progeny229.4	37	4	1152	1
2014	progeny.1-11-5.2	219	2	1152	1
2014	progeny.3-5-3.1	378	1	1151	1
2014	progeny.2-9-4.3	339	3	1149	1
2014	progeny.2-12-2.4	277	4	1148	1
2013	progeny247.2	55	2	1146	1
2014	progeny.2-12-5.3	280	3	1144	0
2013	progeny376.4	184	4	1144	1
2013	progeny330.2	138	2	1140	1
2013	progeny251.2	59	2	1139	1
2014	progeny.3-8-3.4	393	4	1139	1
2014	progeny.2-3-3.2	308	2	1135	1
2014	progeny.1-5-6.3	240	3	1131	1
2014	progeny.3-9-1.3	396	3	1128	1
2014	progeny.1-10-2.2	214	2	1124	1
2014	progeny.2-16-2.1	297	1	1124	1
2013	progeny385.4	193	4	1121	1
2014	progeny.3-8-1.1	391	1	1119	1
2013	progeny293.3	101	3	1117	1
2013	progeny340.2	148	2	1103	1
2014	progeny.1-8-1.1	251	1	1099	1
2013	progeny350.2	158	2	1094	1
2013	progeny377.4	185	4	1086	1
2014	progeny.3-15-1.1	358	1	1084	1
2013	progeny293.4	101	4	1082	1
2013	progeny375.3	183	3	1080	0
2014	progeny.1-6-2.2	242	2	1075	1
2013	progeny231.1	39	1	1073	1
2014	progeny.1-11-5.4	219	4	1068	1
2013	progeny394.4	202	4	1064	0
2014	progeny.2-8-3.1	333	1	1063	1
2013	progeny257.1	65	1	1061	1
2013	Progeny.270.2	78	2	1061	1
2013	progeny233.2	41	2	1058	1
2013	progeny251.1	59	1	1054	1
2013	progeny209.2	17	2	1051	1
2013	progeny344.3	152	3	1051	1
2013	progeny319.3	127	3	1049	0
2013	progeny379.1	187	1	1047	1
2014	progeny.1-4-4.3	233	3	1044	1
2013	progeny228.4	36	4	1038	1
2013	progeny343.2	151	2	1035	1
2014	progeny.2-5-1.1	316	1	1031	1
2014	progeny.2-12-1.1	276	1	1030	1
2013	progeny285.1	93	1	1027	1
2013	progeny326.1	134	1	1026	1
2014	progeny.2-4-4.2	314	2	1026	1
2014	progeny.3-10-2.4	347	4	1026	1
2014	progeny.2-10-1.1	266	1	1023	1
2014	progeny.2-4-5.5	315	5	1022	1
2014	progeny.2-11-3.3	273	3	1017	1
2013	progeny281.1	89	1	1015	1
2013	progeny378.1	186	1	1008	1
2014	progeny.2-15-2.1	292	1	1006	1
2013	progeny359.1	167	1	1005	1
2013	progeny386.4	194	4	1001	1
2013	progeny228.3	36	3	997	1
2014	progeny.2-15-4.4	294	4	997	1
2014	progeny.2-13-5.1	285	1	996	1
2013	progeny283.1	91	1	994	1
2013	progeny300.1	108	1	987	1
2013	progeny362.3	170	3	985	1
2014	progeny.3-7-5.2	390	2	983	1
2013	progeny.338.3	146	3	977	1
2014	progeny.2-14-1.1	286	1	971	1
2013	progeny256.2	64	2	970	1
2014	progeny.2-6-5.1	325	1	966	1
2014	progeny.3-2-1.1	361	1	961	1
2013	progeny279.4	87	4	955	1
2014	progeny.1-4-4.2	233	2	953	0.978333
2013	progeny383.1	191	1	953	1
2013	progeny313.2	121	2	950	0
2014	progeny.1-9-1.8	256	8	947	1
2014	progeny.1-11-5.1	219	1	945	1
2013	progeny218.1	26	1	938	1
2013	progeny368.1	176	1	937	1
2014	progeny.2-8-4.1	334	1	934	1
2013	progeny213.2	21	2	932	1
2014	progeny.3-7-3.4	388	4	931	1
2013	progeny266.3	74	3	929	1
2014	progeny.2-4-5.4	315	4	917	1
2014	progeny.2-10-2.2	267	2	916	1
2014	progeny.2-13-1.1	281	1	916	1
2014	progeny.3-1-4.4	344	4	915	1
2013	progeny216.1	24	1	914	0.999722
2013	progeny349.1	157	1	914	1
2014	progeny.2-2-2.1	302	1	911	0
2013	progeny382.2	190	2	905	1
2013	progeny297.1	105	1	903	1
2014	progeny.1-4-2.1	231	1	897	1
2013	progeny320.1	128	1	895	1
2014	progeny.3-5-4.1	379	1	895	1
2013	progeny383.4	191	4	894	1
2013	progeny357.2	165	2	892	1
2013	progeny297.4	105	4	873	1
2013	progeny307.3	115	3	873	1
2013	progeny292.2	100	2	868	1
2014	progeny.3-1-2.2	342	2	865	1
2014	progeny.2-12-3.4	278	4	862	1
2013	progeny325.3	133	3	861	1
2014	progeny.1-2-3.2	222	2	853	1
2014	progeny.3-12-2.3	357	3	843	1
2014	progeny.1-10-5.1	217	1	841	1
2014	progeny.1-6-4.1	244	1	841	1
2014	progeny.1-10-4.3	216	3	840	0.999722
2014	progeny.2-9-1.2	336	2	837	1
2013	progeny255.2	63	2	835	1
2013	progeny373.2	181	2	832	1
2014	progeny.1-7-5.3	250	3	831	1
2013	progeny367.3	175	3	825	1
2013	progeny356.2	164	2	824	1
2013	progeny254.3	62	3	821	1
2013	progeny395.2	203	2	819	0
2013	progeny377.2	185	2	816	1
2013	progeny334.4	142	4	814	1
2013	progeny397.4	205	4	800	1
2013	progeny353.2	161	2	798	1
2014	progeny.3-9-5.2	400	2	796	1
2013	progeny326.4	134	4	795	1
2013	progeny344.1	152	1	795	1
2013	progeny253.3	61	3	794	0.433611
2014	progeny.1-5-2.1	236	1	793	0.996667
2013	progeny279.1	87	1	792	1
2013	progeny320.4	128	4	786	1
2013	progeny357.1	165	1	785	0
2013	progeny395.3	203	3	785	1
2013	progeny.214.1	22	1	779	1
2014	progeny.3-9-3.1	398	1	767	0.400833
2013	progeny269.1	77	1	767	0.500833
2014	progeny.2-13-3.1	283	1	766	1
2014	progeny.1-7-1.2	246	2	765	1
2013	progeny389.1	197	1	762	1
2014	progeny.1-7-2.1	247	1	762	1
2013	progeny208.2	16	2	756	1
2014	progeny.1-3-3.4	227	4	754	1
2013	progeny274.2	82	2	750	1
2013	progeny340.4	148	4	747	1
2013	progeny328.4	136	4	745	1
2014	progeny.1-8-1.2	251	2	739	1
2013	progeny336.1	144	1	732	1
2014	progeny.1-10-5.4	217	4	728	1
2014	progeny.2-12-3.1	278	1	719	1
2013	progeny271.1	79	1	718	1
2014	progeny.2-16-1.2	296	2	712	0.894722
2013	progeny212.3	20	3	712	1
2014	progeny.3-8-3.3	393	3	710	1
2013	progeny314.4	122	4	708	1
2014	progeny.2-8-5.4	335	4	708	1
2013	progeny239.2	47	2	707	1
2014	progeny.3-3-3.4	368	4	703	1
2013	progeny390.3	198	3	698	0.995278
2013	progeny327.3	135	3	696	1
2013	progeny281.3	89	3	687	1
2013	progeny302.1	110	1	674	1
2014	progeny.1-8-3.3	253	3	664	1
2013	progeny310.3	118	3	661	1
2014	progeny.1-10-2.3	214	3	658	0
2013	progeny390.4	198	4	655	0.000555556
2013	progeny258.3	66	3	649	0.5
2014	progeny.2-4-1.3	311	3	649	1
2013	progeny330.4	138	4	644	1
2014	progeny.2-10-3.2	268	2	637	1
2013	progeny360.2	168	2	635	1
2013	progeny275.1	83	1	628	1
2014	progeny.1-8-3.1	253	1	625	1
2013	progeny376.2	184	2	615	1
2013	progeny308.2	116	2	614	1
2013	progeny290.2	98	2	612	1
2014	progeny.1-4-2.4	231	4	610	1
2014	progeny.3-2-1.4	361	4	607	1
2013	progeny318.3	126	3	595	1
2013	progeny331.2	139	2	588	1
2014	progeny.3-1-4.2	344	2	585	1
2014	progeny.3-12-1.1	356	1	578	1
2013	progeny261.4	69	4	577	1
2013	progeny323.2	131	2	574	1
2013	progeny.338.2	146	2	573	1
2014	progeny.1-5-6.4	240	4	572	1
2014	progeny.1-3-3.2	227	2	568	1
2014	progeny.2-11-3.2	273	2	566	0.998889
2014	progeny.3-8-3.1	393	1	565	1
2013	progeny307.4	115	4	562	1
2014	progeny.3-9-4.4	399	4	558	1
2013	progeny256.3	64	3	555	1
2013	progeny292.4	100	4	553	1
2013	progeny385.1	193	1	552	1
2014	progeny.2-14-3.2	288	2	552	1
2013	progeny272.3	80	3	550	0.999444
2013	progeny278.4	86	4	547	0
2014	progeny.3-11-1.3	351	3	547	0
2013	progeny264.3	72	3	547	1
2013	progeny306.3	114	3	543	1
2013	progeny376.3	184	3	535	1
2014	progeny.3-9-4.2	399	2	530	0
2014	progeny.1-5-4.1	238	1	530	1
2014	progeny.2-15-3.1	293	1	529	1
2014	progeny.3-5-3.3	378	3	523	0.998056
2013	progeny331.3	139	3	522	1
2013	progeny320.2	128	2	520	1
2014	progeny.2-2-2.3	302	3	518	0.0961111
2014	progeny.2-15-4.3	294	3	517	0.985278
2013	progeny323.4	131	4	516	1
2014	progeny.3-10-3.2	348	2	509	1
2013	progeny257.4	65	4	507	1
2013	progeny362.1	170	1	507	1
2013	progeny329.1	137	1	506	1
2013	progeny378.3	186	3	502	1
2013	progeny306.1	114	1	500	1
2013	progeny240.4	48	4	497	1
2013	progeny346.2	154	2	488	0
2013	progeny365.1	173	1	487	0.276111
2013	progeny351.2	159	2	487	1
2013	progeny245.2	53	2	482	1
2013	progeny399.2	207	2	482	1
2013	progeny341.1	149	1	481	1
2014	progeny.2-14-4.2	289	2	479	0.6725
2014	progeny.2-4-3.2	313	2	476	0.323889
2014	progeny.1-5-6.1	240	1	473	0.986944
2014	progeny.2-4-2.3	312	3	465	0.465
2013	progeny221.4	29	4	458	1
2013	progeny263.1	71	1	454	1
2014	progeny.3-9-4.1	399	1	452	0
2013	progeny373.1	181	1	452	1
2013	progeny368.3	176	3	450	0.813611
2013	progeny350.4	158	4	443	1
2014	progeny.2-3-3.1	308	1	437	1
2013	progeny368.2	176	2	434	0.570556
2013	progeny212.1	20	1	428	1
2013	progeny220.1	28	1	428	1
2013	progeny206.3	14	3	426	1
2014	progeny.3-8-2.4	392	4	424	1
2014	progeny.2-4-5.1	315	1	421	1
2013	progeny343.1	151	1	419	1
2014	progeny.2-14-2.3	287	3	416	1
2013	progeny212.2	20	2	415	1
2014	progeny.1-3-3.3	227	3	414	1
2014	progeny.1-7-2.4	247	4	410	0.991111
2013	progeny207.3	15	3	408	1
2013	progeny249.1	57	1	398	1
2014	progeny.3-2-4.2	364	2	398	1
2013	progeny342.4	150	4	389	0.300278
2013	progeny307.2	115	2	388	1
2014	progeny.1-3-2.4	226	4	388	1
2013	progeny309.3	117	3	383	1
2013	progeny244.2	52	2	381	1
2013	progeny294.3	102	3	378	1
2013	progeny331.4	139	4	371	1
2013	progeny361.1	169	1	368	1
2014	progeny.2-9-5.2	340	2	359	1
2014	progeny.1-9-1.5	256	5	357	1
2013	progeny391.1	199	1	356	0
2013	progeny289.1	97	1	356	1
2013	progeny202.1	10	1	355	1
2013	progeny230.1	38	1	355	1
2013	progeny331.1	139	1	355	1
2014	progeny.3-5-5.2	380	2	350	0.355833
2013	progeny330.1	138	1	343	1
2013	progeny335.1	143	1	342	1
2014	progeny.1-8-5.3	255	3	336	1
2014	progeny.2-14-3.1	288	1	328	1
2014	progeny.1-3-2.1	226	1	327	0.878056
2013	progeny348.4	156	4	317	1
2013	progeny313.4	121	4	316	0
2013	progeny310.2	118	2	313	1
2013	progeny339.1	147	1	306	0.960556
2014	progeny.2-13-5.2	285	2	302	1
2013	progeny260.2	68	2	298	1
2014	progeny.2-11-2.2	272	2	296	1
2014	progeny.3-3-5.1	370	1	296	1
2013	progeny309.4	117	4	293	0.999444
2013	progeny211.3	19	3	291	0.5
2014	progeny.1-8-1.3	251	3	289	0.896944
2013	progeny206.2	14	2	288	0.992222
2014	progeny.2-4-3.4	313	4	282	0.495278
2014	progeny.2-2-1.3	301	3	281	0
2014	progeny.2-16-1.3	296	3	280	0.789722
2013	progeny361.2	169	2	279	1
2014	progeny.1-7-2.3	247	3	278	1
2014	progeny.2-4-2.1	312	1	275	0.554167
2014	progeny.2-14-2.2	287	2	274	1
2013	progeny353.4	161	4	273	1
2013	progeny352.2	160	2	268	1
2013	progeny221.2	29	2	267	1
2013	progeny328.1	136	1	267	1
2014	progeny.3-10-2.1	347	1	266	1
2013	progeny207.2	15	2	265	1
2014	progeny.2-6-1.4	321	4	265	1
2014	progeny.1-10-3.3	215	3	264	0.0669444
2013	progeny291.1	99	1	262	1
2013	progeny380.1	188	1	256	1
2013	progeny278.2	86	2	254	0
2014	progeny.2-15-4.1	294	1	252	1
2013	progeny202.3	10	3	249	0.999444
2013	progeny355.3	163	3	240	0.0341667
2014	progeny.2-15-3.3	293	3	239	0.00194444
2013	progeny307.1	115	1	232	1
2013	progeny370.3	178	3	231	0.687222
2013	progeny254.1	62	1	226	1
2013	progeny337.1	145	1	224	1
2013	progeny356.4	164	4	220	1
2013	progeny223.1	31	1	219	1
2013	progeny317.4	125	4	218	1
2014	progeny.1-6-3.1	243	1	217	0.998611
2013	progeny224.1	32	1	216	0.698333
2014	progeny.2-7-4.2	329	2	216	1
2013	progeny376.1	184	1	214	0.973056
2013	progeny266.2	74	2	210	1
2013	progeny355.1	163	1	209	0.015
2014	progeny.2-13-5.3	285	3	208	1
2013	progeny254.2	62	2	207	0.725833
2014	progeny.1-8-1.4	251	4	204	0.73
2013	progeny223.2	31	2	204	1
2014	progeny.3-3-5.4	370	4	204	1
2013	progeny340.1	148	1	199	0.816667
2014	progeny.2-15-2.2	292	2	197	0.995556
2014	progeny.3-8-5.4	395	4	196	1
2013	progeny378.2	186	2	193	1
2014	progeny.3-11-2.2	352	2	192	0.777222
2013	progeny265.1	73	1	192	0.943889
2014	progeny.2-7-3.3	328	3	191	0.503333
2013	progeny210.4	18	4	190	0.967222
2014	progeny.2-14-3.4	288	4	190	0.981667
2013	progeny265.2	73	2	188	0.5
2014	progeny.2-6-1.1	321	1	184	1
2013	progeny393.1	201	1	181	0.813056
2014	progeny.3-6-5.1	385	1	178	0.764444
2013	progeny382.3	190	3	177	0.698056
2013	progeny308.1	116	1	177	1
2014	progeny.2-8-4.3	334	3	171	0.0991667
2013	progeny301.3	109	3	169	0.0263889
2013	progeny259.1	67	1	165	1
2013	progeny333.2	141	2	165	1
2013	progeny342.2	150	2	164	0.5275
2014	progeny.3-15-1.3	358	3	163	0.999444
2013	progeny333.1	141	1	162	0.998611
2014	progeny.1-10-3.2	215	2	161	0.959722
2013	progeny222.2	30	2	159	1
2013	progeny244.1	52	1	159	1
2013	progeny297.2	105	2	157	1
2013	progeny390.1	198	1	150	0.0625
2013	progeny302.4	110	4	150	0.848056
2014	progeny.3-15-3.1	360	1	145	0.806111
2013	progeny361.3	169	3	143	1
2013	progeny395.4	203	4	142	0.531389
2014	progeny.1-2-1.1	220	1	142	1
2014	progeny.3-12-1.2	356	2	140	1
2013	progeny389.2	197	2	133	0.960278
2013	progeny343.3	151	3	131	0.00388889
2013	progeny258.2	66	2	124	0.5
2014	progeny.2-6-1.3	321	3	123	1
2013	progeny322.2	130	2	119	0.896667
2013	progeny210.1	18	1	118	0.500833
2013	progeny242.1	50	1	116	1
2013	progeny310.4	118	4	116	1
2013	progeny364.1	172	1	116	1
2013	progeny285.3	93	3	112	0.985
2013	progeny381.1	189	1	110	1
2013	progeny282.1	90	1	109	1
2013	progeny.214.4	22	4	107	1
2013	progeny245.3	53	3	106	1
2013	progeny277.3	85	3	105	0.449167
2014	progeny.3-3-5.2	370	2	105	0.991944
2014	progeny.1-6-2.4	242	4	95	0.891667
2014	progeny.3-11-4.2	354	2	94	0.520556
2013	progeny268.1	76	1	93	0.255556
2013	progeny354.2	162	2	87	0.25
2013	progeny211.2	19	2	87	0.998611
2014	progeny.3-1-2.3	342	3	87	1
2014	progeny.3-6-2.4	382	4	86	0.983611
2013	progeny318.2	126	2	85	0.976389
2014	progeny.2-5-2.4	317	4	83	0.907778
2014	progeny.1-2-2.4	221	4	83	0.999167
2014	progeny.1-2-5.3	224	3	83	1
2014	progeny.3-10-3.4	348	4	81	0.251944
2013	progeny202.2	10	2	80	0.996944
2014	progeny.2-8-1.4	331	4	79	0.624167
2013	progeny346.1	154	1	76	0.999722
2014	progeny.2-4-2.2	312	2	75	0.6075
2013	progeny370.2	178	2	74	0.473611
2013	progeny222.1	30	1	74	0.946111
2013	progeny286.1	94	1	68	0.468333
2014	progeny.2-7-3.2	328	2	68	0.503056
2013	progeny277.1	85	1	68	0.5225
2014	progeny.3-9-5.1	400	1	67	0.504444
2013	progeny323.3	131	3	66	1
2013	progeny210.3	18	3	64	0.5
2014	progeny.1-6-3.3	243	3	64	0.5
2014	progeny.3-9-1.2	396	2	62	0.5
2014	progeny.1-2-1.4	220	4	60	0.2
2013	progeny253.2	61	2	60	0.391389
2013	progeny305.2	113	2	60	0.999722
2014	progeny.2-16-1.4	296	4	59	0.3025
2014	progeny.3-11-3.4	353	4	59	0.5
2014	progeny.1-5-6.2	240	2	58	0.500278
2013	progeny370.1	178	1	57	0.995278
2013	progeny332.2	140	2	56	0.5
2013	progeny299.3	107	3	55	0.173611
2013	progeny221.3	29	3	55	0.981389
2014	progeny.1-10-2.4	214	4	54	0.5
2014	progeny.3-9-3.4	398	4	53	0.505556
2013	progeny340.3	148	3	52	0.708333
2014	progeny.2-11-2.1	272	1	51	0.493056
2013	progeny291.2	99	2	50	0.760833
2013	progeny207.4	15	4	49	0.5
2014	progeny.3-11-4.3	354	3	49	0.5
2013	progeny364.2	172	2	48	0.985278
2013	progeny319.1	127	1	47	0.838056
2014	progeny.1-9-1.7	256	7	46	0.453333
2014	progeny.1-8-4.1	254	1	46	0.5
2014	progeny.2-11-2.4	272	4	46	0.904722
2014	progeny.3-3-3.2	368	2	45	0.500556
2014	progeny.3-6-5.2	385	2	44	0.5
2014	progeny.3-5-4.3	379	3	44	0.500278
2013	progeny375.4	183	4	44	0.998333
2013	progeny325.2	133	2	42	0.5
2014	progeny.1-7-2.2	247	2	39	0.44
2013	progeny365.2	173	2	38	0.806389
2013	progeny394.1	202	1	37	0.993333
2013	progeny341.2	149	2	36	0.423611
2014	progeny.1-9-3.2	258	2	36	0.734444
2014	progeny.2-6-2.4	322	4	35	0.4925
2013	progeny254.4	62	4	35	0.954444
2014	progeny.2-9-2.2	337	2	34	0.5
2013	progeny348.1	156	1	34	0.525278
2013	progeny298.1	106	1	33	1
2013	progeny301.1	109	1	31	0.204444
2013	progeny299.4	107	4	31	0.5
2013	progeny328.3	136	3	31	0.579167
2014	progeny.3-6-3.4	383	4	31	0.670556
2014	progeny.1-1-5.4	212	4	31	0.998611
2014	progeny.2-4-4.1	314	1	31	1
2013	progeny272.1	80	1	30	0.5
2014	progeny.3-9-1.1	396	1	30	0.5
2014	progeny.3-9-5.4	400	4	30	0.504167
2014	progeny.1-4-5.2	234	2	30	0.978611
2013	progeny268.2	76	2	28	0.5
2014	progeny.1-9-3.4	258	4	27	0.5
2013	progeny364.3	172	3	26	0.453056
2014	progeny.3-2-5.2	365	2	26	0.605
2014	progeny.2-4-4.3	314	3	26	0.904167
2013	progeny209.1	17	1	26	1
2014	progeny.2-4-4.4	314	4	25	0.506667
2014	progeny.2-16-1.1	296	1	24	0.5
2013	progeny286.2	94	2	23	0.501389
2013	progeny353.1	161	1	23	0.698056
2013	progeny399.1	207	1	23	0.996389
2013	progeny337.2	145	2	21	0.515278
2013	progeny369.4	177	4	20	0.5
2013	progeny206.1	14	1	19	0.5
2014	progeny.2-4-1.4	311	4	19	0.5
2014	progeny.2-7-4.1	329	1	19	0.764444
2014	progeny.2-8-1.3	331	3	18	0.563056
2013	progeny253.1	61	1	17	0.5
2013	progeny315.2	123	2	17	0.5
2014	progeny.3-11-4.4	354	4	17	0.501389
2014	progeny.2-5-5.1	320	1	17	1
2013	progeny309.1	117	1	16	0.5
2014	progeny.2-14-4.3	289	3	15	0.5
2014	progeny.3-15-3.2	360	2	15	0.5
2014	progeny.3-11-2.3	352	3	15	0.507778
2013	progeny294.4	102	4	15	0.843889
2013	progeny382.1	190	1	14	0.5
2014	progeny.3-4-2.4	372	4	14	0.5
2013	progeny329.4	137	4	14	0.983611
2014	progeny.2-1-1.4	261	4	13	0.5
2014	progeny.2-9-2.3	337	3	13	0.5
2014	progeny.3-1-3.3	343	3	13	0.5
2013	progeny210.2	18	2	13	0.579167
2014	progeny.1-6-4.4	244	4	13	0.673611
2013	progeny371.1	179	1	13	0.997778
2013	progeny294.1	102	1	13	1
2013	progeny299.2	107	2	12	0.5
2013	progeny293.1	101	1	12	0.579167
2013	progeny304.1	112	1	12	0.8075
2013	progeny356.1	164	1	12	0.9375
2013	progeny301.2	109	2	11	0.496944
2014	progeny.2-2-1.1	301	1	11	0.497778
2013	progeny341.3	149	3	11	0.5
2013	progeny390.2	198	2	11	0.509167
2013	progeny206.4	14	4	11	0.791944
2014	progeny.3-3-1.1	366	1	11	0.806667
2013	progeny242.4	50	4	11	1
2013	progeny219.1	27	1	10	0.5
2013	progeny370.4	178	4	10	0.5
2013	progeny384.4	192	4	10	0.5
2014	progeny.3-7-3.2	388	2	10	0.5
2014	progeny.3-9-5.3	400	3	10	0.5
2013	progeny347.1	155	1	10	0.810556
2014	progeny.3-1-2.4	342	4	10	0.905
2013	progeny305.4	113	4	9	0.5
2013	progeny369.2	177	2	9	0.5
2013	progeny369.3	177	3	9	0.5
2014	progeny.2-6-2.3	322	3	9	0.5
2014	progeny.2-7-1.1	326	1	9	0.5
2014	progeny.3-8-1.4	391	4	9	0.557222
2013	progeny207.1	15	1	8	0.5
2013	progeny316.1	124	1	8	0.5
2013	progeny316.4	124	4	8	0.5
2013	progeny317.1	125	1	8	0.5
2014	progeny.1-3-1.3	225	3	8	0.5
2014	progeny.1-6-1.1	241	1	8	0.5
2014	progeny.2-8-5.3	335	3	8	0.5
2014	progeny.3-1-3.1	343	1	8	0.5
2013	progeny317.2	125	2	8	0.521667
2014	progeny.2-13-2.4	282	4	8	0.856111
2013	progeny341.4	149	4	8	0.977778
2013	progeny287.3	95	3	7	0.5
2013	progeny309.2	117	2	7	0.5
2014	progeny.2-9-4.2	339	2	7	0.537222
2013	progeny222.3	30	3	7	0.593889
2014	progeny.2-13-5.4	285	4	7	1
2013	progeny221.1	29	1	6	0.5
2013	progeny315.3	123	3	6	0.5
2013	progeny344.2	152	2	6	0.5
2013	progeny354.4	162	4	6	0.5
2014	progeny.1-1-1.2	208	2	6	0.5
2014	progeny.2-6-2.2	322	2	6	0.5
2014	progeny.3-1-3.2	343	2	6	0.5
2014	progeny.3-3-3.1	368	1	6	0.5
2013	progeny278.1	86	1	6	0.744167
2013	progeny242.2	50	2	5	0.5
2013	progeny305.3	113	3	5	0.5
2013	progeny365.3	173	3	5	0.5
2014	progeny.2-1-5.1	265	1	5	0.5
2014	progeny.2-10-2.1	267	1	5	0.5
2014	progeny.2-7-4.3	329	3	5	0.5
2014	progeny.3-12-2.4	357	4	5	0.5
2013	progeny264.1	72	1	5	0.504444
2013	progeny267.1	75	1	5	0.504444
2013	progeny256.1	64	1	4	0.5
2013	progeny272.2	80	2	4	0.5
2013	progeny294.2	102	2	4	0.5
2013	progeny315.1	123	1	4	0.5
2013	progeny363.3	171	3	4	0.5
2014	progeny.1-1-1.1	208	1	4	0.5
2014	progeny.1-1-1.3	208	3	4	0.5
2014	progeny.2-1-5.4	265	4	4	0.5
2014	progeny.2-12-4.4	279	4	4	0.5
2014	progeny.3-11-2.4	352	4	4	0.5
2014	progeny.3-3-1.2	366	2	4	0.5
2014	progeny.3-3-3.3	368	3	4	0.5
2014	progeny.3-8-2.1	392	1	4	0.5
2014	progeny.3-9-3.2	398	2	4	0.5
2014	progeny.2-15-1.4	291	4	4	0.779444
2014	progeny.2-3-4.1	309	1	4	0.818333
2013	progeny324.1	132	1	4	0.9725
2013	progeny242.3	50	3	3	0.5
2013	progeny245.4	53	4	3	0.5
2013	progeny287.1	95	1	3	0.5
2013	progeny315.4	123	4	3	0.5
2013	progeny354.1	162	1	3	0.5
2013	progeny354.3	162	3	3	0.5
2013	progeny384.3	192	3	3	0.5
2014	progeny.1-2-5.1	224	1	3	0.5
2014	progeny.1-3-1.2	225	2	3	0.5
2014	progeny.1-3-1.4	225	4	3	0.5
2014	progeny.1-6-3.4	243	4	3	0.5
2014	progeny.2-13-2.1	282	1	3	0.5
2014	progeny.2-14-1.2	286	2	3	0.5
2014	progeny.2-14-4.4	289	4	3	0.5
2014	progeny.2-7-3.1	328	1	3	0.5
2014	progeny.3-1-5.1	345	1	3	0.5
2014	progeny.3-5-4.2	379	2	3	0.5
2014	progeny.2-15-5.3	295	3	3	0.691389
2014	progeny.1-8-5.4	255	4	3	0.978889
2013	progeny245.1	53	1	2	0.5
2013	progeny277.2	85	2	2	0.5
2013	progeny285.4	93	4	2	0.5
2013	progeny287.2	95	2	2	0.5
2013	progeny304.3	112	3	2	0.5
2013	progeny310.1	118	1	2	0.5
2013	progeny316.3	124	3	2	0.5
2013	progeny317.3	125	3	2	0.5
2013	progeny318.1	126	1	2	0.5
2013	progeny344.4	152	4	2	0.5
2013	progeny363.1	171	1	2	0.5
2013	progeny363.2	171	2	2	0.5
2013	progeny371.3	179	3	2	0.5
2014	progeny.1-1-1.4	208	4	2	0.5
2014	progeny.1-7-4.4	249	4	2	0.5
2014	progeny.1-9-1.4	256	4	2	0.5
2014	progeny.2-1-5.2	265	2	2	0.5
2014	progeny.2-9-4.1	339	1	2	0.5
2014	progeny.3-9-4.3	399	3	2	0.5
2014	progeny.3-6-5.4	385	4	2	0.508056
2013	progeny371.2	179	2	2	0.982778
2013	progeny222.4	30	4	1	0.5
2013	progeny273.1	81	1	1	0.5
2013	progeny299.1	107	1	1	0.5
2013	progeny316.2	124	2	1	0.5
2013	progeny318.4	126	4	1	0.5
2013	progeny329.2	137	2	1	0.5
2013	progeny332.3	140	3	1	0.5
2013	progeny369.1	177	1	1	0.5
2013	progeny371.4	179	4	1	0.5
2013	progeny384.1	192	1	1	0.5
2014	progeny.1-2-5.4	224	4	1	0.5
2014	progeny.1-3-1.1	225	1	1	0.5
2014	progeny.2-1-1.3	261	3	1	0.5
2014	progeny.2-1-5.3	265	3	1	0.5
2014	progeny.2-10-1.4	266	4	1	0.5
2014	progeny.2-14-1.3	286	3	1	0.5
2014	progeny.2-15-4.2	294	2	1	0.5
2014	progeny.2-15-5.4	295	4	1	0.5
2014	progeny.2-16-4.2	299	2	1	0.5
2014	progeny.2-3-2.3	307	3	1	0.5
2014	progeny.2-3-4.2	309	2	1	0.5
2014	progeny.2-3-4.3	309	3	1	0.5
2014	progeny.2-6-2.1	322	1	1	0.5
2014	progeny.3-3-1.4	366	4	1	0.5
2014	progeny.3-6-3.2	383	2	1	0.5
2014	progeny.3-6-5.3	385	3	1	0.5
2013	progeny219.2	27	2	0
2013	progeny236.4	44	4	0
2013	progeny273.2	81	2	0
2013	progeny276.1	84	1	0
2013	progeny295.1	103	1	0
2013	progeny321.2	129	2	0
2013	progeny322.3	130	3	0
2013	progeny347.2	155	2	0
2013	progeny374.1	182	1	0
2014	progeny.1-5-4.2	238	2	0
2014	progeny.1-6-1.2	241	2	0
2014	progeny.1-8-4.2	254	2	0
2014	progeny.1-9-5.4	260	4	0
2014	progeny.2-1-2.4	262	4	0
2014	progeny.2-11-5.4	275	4	0
2014	progeny.2-12-1.4	276	4	0
2014	progeny.2-16-4.3	299	3	0
2014	progeny.2-3-2.4	307	4	0
2014	progeny.2-7-3.4	328	4	0
2014	progeny.3-1-3.4	343	4	0
2014	progeny.3-1-5.2	345	2	0
2014	progeny.3-2-4.4	364	4	0
2014	progeny.3-2-5.3	365	3	0
2014	progeny.3-5-5.4	380	4	0
2014	progeny.3-6-1.3	381	3	0
2014	progeny.3-7-1.2	386	2	0
